# Supplementary material for: Kindlin-1 regulates IL-6 secretion and modulates the immune environment in breast cancer models
Source: eLife. 2023 Mar 8;12:e85739. doi: 10.7554/eLife.85739 (PMC10023156; doi:10.7554/eLife.85739)
Supplement: Figure 1—figure supplement 2—source data 1. [file elife-85739-fig1-figsupp2-data1.xlsx]

## Sheet: MET-01-Kindlin-1-WT-and-NULL-in
NanoString PanCancer panel analysis of Met-1 Kin1-WT and NULL cells in vitro (normalised expression)
Name	Gene ID	Alias	Description	null 1	null 2	null 3	null 4	wt 1	wt 2	wt 3	wt 4
Abl1	11350	AI325092|Abl|E430008G22Rik|c-Abl	c-abl oncogene 1, non-receptor tyrosine kinase	8.22625	8.33402	8.04026	8.32933	8.86006	9.15398	8.54041	8.88385
Acvr1b	11479	6820432J04|ActR-IB|ActRIB|Acvrlk4|Alk4|SKR2	activin A receptor, type 1B	7.2152	7.1758	7.19896	7.15649	7.1585	7.58694	6.96037	6.82331
Acvr2a	11480	ActrIIa|Acvr2|TactrII	activin receptor IIA	7.53268	7.44429	7.80382	7.38636	8.10657	8.87019	7.77192	8.5969
Angpt1	11600	1110046O21Rik|Ang-1|Ang1	angiopoietin 1	6.09972	8.37458	8.90401	7.88293	5.11411	6.27262	4.59358	6.15346
Angpt2	11601	Agpt2|Ang-2|Ang2	angiopoietin 2	4.00019	4.39444	4.78392	4.07557	4.98858	5.11216	4.43312	5.35699
Akt1	11651	Akt|PKB|PKB/Akt|PKBalpha|Rac	thymoma viral proto-oncogene 1	10.6577	10.0633	9.8936	10.079	10.7028	10.6255	10.5256	10.4287
Akt2	11652	2410016A19Rik|AW554154|PKB|PKBbeta	thymoma viral proto-oncogene 2	8.80016	8.73429	8.87374	8.92972	9.36519	9.63018	9.10054	9.43549
Alk	11682	CD246|Tcrz	anaplastic lymphoma kinase	3.19283	3.30134	2.78392	3.37513	1.52914	3.34662	2.93062	3.56849
Amh	11705	MIS	anti-Mullerian hormone	1.9298	2.39444	3.07343	2.69706	2.85107	3.0247	2.66758	2.91642
Apc	11789	AI047805|AU020952|AW124434|CC1|Min|mAPC	adenomatosis polyposis coli	9.67933	9.36742	9.19519	9.11323	9.22958	9.1095	9.45418	9.45114
Birc3	11796	AW107670|Api1|Api2|Birc2|HIAP2|IAP1|IAP2|MIAP1|MIAP2|MIHB|MIHC|RNF49|cIAP-1|cIAP-2|cIAP1|cIAP2	baculoviral IAP repeat-containing 3	5.30831	6.12237	5.95384	5.8014	6.43604	7.11216	6.36802	6.64822
Ar	11835	AW320017|Tfm	androgen receptor	1.9298	2.39444	1.93592	1.37513	2.52914	2.83205	3.15301	2.69402
Rhoa	11848	Arha|Arha1|Arha2	ras homolog gene family, member A	12.079	11.9836	12.006	12.2459	12.0448	11.8588	12.0842	11.8941
Arnt2	11864	Hif-2b|bHLHe1|mKIAA0307	aryl hydrocarbon receptor nuclear translocator 2	4.96542	4.43884	3.78392	3.18249	3.85107	3.93159	4.59358	4.35699
Atm	11920	AI256621|C030026E19Rik	ataxia telangiectasia mutated	8.29437	8.54419	8.16858	8.4626	7.87787	7.90121	8.20984	8.21235
Axin1	12005	AI316800|Axin|Fu|Kb|Ki|fused|kinky|knobbly	axin 1	8.33579	8.28014	8.14147	8.20168	8.47751	8.20957	8.4278	8.15346
Axin2	12006	Axi1|Axil|Conductin	axin2	3.69533	3.97941	5.07343	4.28202	3.69907	4.11216	3.51558	2.91642
B2m	12010	Ly-m11|beta2-m|beta2m	beta-2 microglobulin	12.5914	12.5637	13.0598	12.3968	12.9009	14.0394	12.7342	13.4691
Bad	12015	AI325008|Bbc2	BCL2-associated agonist of cell death	9.13143	9.31331	9.47663	9.28802	9.19092	9.45932	9.12373	9.44222
Bax	12028	-	BCL2-associated X protein	9.20406	9.71299	9.78892	9.7653	10.0933	9.92858	9.81733	9.86228
Bcl2	12043	AW986256|Bcl-2|C430015F12Rik|D630044D05Rik|D830018M01Rik	B cell leukemia/lymphoma 2	6.75762	6.69823	6.59127	6.56496	6.75796	6.95543	6.82139	6.9917
Bcl2a1a	12044	A1|BB218357|Bcl2a1|Bfl-1|Hbpa1	B cell leukemia/lymphoma 2 related protein A1a	1.60787	2.39444	3.19896	1.37513	1.52914	2.60966	3.51558	2.69402
Bcl2l1	12048	Bcl(X)L|Bcl-XL|Bcl2l|BclX|bcl-x|bcl2-L-1	BCL2-like 1	8.72421	8.94519	8.76374	8.91429	10.0566	10.0609	9.37632	9.87061
Bdnf	12064	-	brain derived neurotrophic factor	4.36276	3.56437	3.52088	4.54506	6.59523	6.39974	6.32294	6.37585
Bid	12122	2700049M22Rik|AI875481|AU022477	BH3 interacting domain death agonist	8.69533	9.37744	9.49816	9.31765	9.661	10.012	9.0972	9.65788
Prdm1	12142	Blimp-1|Blimp1|PRDI-BF1|ZNFPR1A1|b2b1765Clo	PR domain containing 1, with ZNF domain	2.19283	3.48191	3.70146	2.9601	2.85107	3.19462	3.80509	3.27899
Blm	12144	-	Bloom syndrome, RecQ helicase-like	7.38923	7.41125	7.49664	7.55504	6.93854	6.68291	7.21602	6.87725
Bmp2	12156	AI467020|Bmp2a	bone morphogenetic protein 2	1.9298	0.979407	1.93592	1.9601	2.85107	2.0247	3.34566	1.10906
Bmp4	12159	Bmp-4|Bmp2b|Bmp2b-1|Bmp2b1	bone morphogenetic protein 4	5.8558	5.91801	5.82345	5.01899	6.61661	5.69712	6.34566	5.94195
Bmp5	12160	AU023399|se	bone morphogenetic protein 5	2.19283	1.97941	1.19896	2.69706	2.52914	2.83205	1.93062	2.10906
Bmp6	12161	D13Wsu115e|Vgr1	bone morphogenetic protein 6	-0.392131	1.39444	2.61399	1.9601	0.529144	1.0247	1.93062	1.10906
Bmp7	12162	OP1	bone morphogenetic protein 7	5.28029	4.94903	5.10585	5.58459	3.11411	3.60966	3.34566	3.10906
Bmp8a	12163	Bmp7r1|OP-2|OP2	bone morphogenetic protein 8a	2.77779	2.56437	3.42135	2.9601	3.85107	3.72514	3.93062	3.8095
Bmpr1b	12167	AI385617|ALK-6|AV355320|Acvrlk6|Alk6|BMPR-1B|BMPR-IB|CFK-43a|SKR6	bone morphogenetic protein receptor, type 1B	5.03413	3.91801	3.93592	4.18249	3.85107	3.19462	4.34566	3.27899
Bnip3	12176	Nip3	BCL2/adenovirus E1B interacting protein 3	11.5338	10.221	10.4766	10.4824	11.2537	11.3014	11.3464	10.8547
Brca1	12189	-	breast cancer 1	8.719	8.79319	8.51184	8.50442	8.64289	8.32848	8.8455	8.76011
Brca2	12190	Fancd1|RAB163	breast cancer 2	7.63024	7.79959	7.18385	7.62306	7.72882	7.19462	7.66758	7.63262
Cacna1c	12288	Cav1.2|Cchl1a1|D930026N18Rik|MBC|MELC-CC	calcium channel, voltage-dependent, L type, alpha 1C subunit	1.60787	2.56437	2.42135	1.9601	0.529144	2.83205	3.51558	3.10906
Cacna1d	12289	8430418G19Rik|C79217|Cach3|Cacn4|Cacnl1a2|Cav1.3|Cchl1a|Cchl1a2|D-LTCC	calcium channel, voltage-dependent, L type, alpha 1D subunit	1.19283	2.2018	2.19896	1.9601	2.11411	2.60966	2.34566	2.10906
Cacna1e	12290	A430040I15|BII|Cach6|Cacnl1a6|Cav2.3|Cchra1|alpha1E	calcium channel, voltage-dependent, R type, alpha 1E subunit	2.41522	1.39444	-0.386006	1.37513	2.85107	2.34662	1.34566	2.10906
Cacna1g	12291	Cav3.1d|[a]1G|a1G|alpha-1G|mKIAA1123	calcium channel, voltage-dependent, T type, alpha 1G subunit	4.73715	4.43884	4.47197	2.9601	4.92146	4.19462	4.80509	4.50138
Cacna2d1	12293	Ca(v)alpha2delta1|Cacna2|Cchl2a	calcium channel, voltage-dependent, alpha2/delta subunit 1	1.9298	2.56437	1.93592	3.37513	1.52914	0.0246963	2.66758	2.10906
Cacna2d3	12294	Cacnad3	calcium channel, voltage-dependent, alpha2/delta subunit 3	9.10172	9.16593	9.22686	9.20168	9.0409	9.15655	9.14979	9.10624
Cacnb2	12296	AW060387|CAB2|Cavbeta2|Cchb2	calcium channel, voltage-dependent, beta 2 subunit	1.9298	2.39444	2.19896	2.37513	3.52914	3.19462	2.34566	2.10906
Cacnb3	12297	Beta3|CAB3|Ca(v)beta3|Cchb3	calcium channel, voltage-dependent, beta 3 subunit	9.80509	10.6752	11.0595	10.6443	10.3023	10.6522	10.1336	10.5777
Cacnb4	12298	3110038O15Rik|Cchb4|lh	calcium channel, voltage-dependent, beta 4 subunit	3.60787	3.2018	3.19896	3.54506	3.69907	3.60966	4.0461	3.8095
Cacng1	12299	-	calcium channel, voltage-dependent, gamma subunit 1	2.77779	2.56437	2.42135	3.37513	2.52914	2.83205	3.66758	3.27899
Camk2b	12323	-	calcium/calmodulin-dependent protein kinase II, beta	3.30831	2.2018	3.70146	2.69706	3.98858	4.54826	4.25255	4.50138
Capn2	12334	AI326419|Capa-2|Capa2|m-calpain|m-calpin	calpain 2	11.7301	11.0238	11.0543	11.1267	11.5376	11.417	11.5181	11.5259
Casp12	12364	-	caspase 12	9.15669	9.31777	9.7199	9.18892	8.947	10.0732	8.55997	9.59489
Casp3	12367	A830040C14Rik|AC-3|Apopain|CASP-3|CC3|CPP-32|CPP32|Caspase-3|Lice|SCA-1|Yama|mldy	caspase 3	9.04041	9.59412	9.89128	9.57481	9.08373	9.5463	9.0599	9.38519
Casp7	12369	AI314680|CMH-1|ICE-IAP3|Mch3|caspase-7|mCASP-7	caspase 7	8.73457	9.75858	9.95718	9.66515	9.39951	10.0894	8.96771	9.53951
Casp8	12370	CASP-8|FLICE|MACH|Mch5	caspase 8	8.79274	8.62326	8.77134	8.73708	8.97623	9.20461	8.71198	8.93878
Casp9	12371	AI115399|APAF-3|AW493809|CASP-9|Caspase-9|ICE-LAP6|Mch6	caspase 9	4.96542	4.64237	5.28642	4.62306	5.173	5.83205	4.43312	5.15346
Ctnnb1	12387	Bfc|Catnb|Mesc	catenin (cadherin associated protein), beta 1	12.8802	12.7516	13.0181	12.7583	12.7759	13.4588	12.3628	13.1409
Runx1	12394	AML1|CBF-alpha-2|Cbfa2|Pebp2a2|Pebpa2b	runt related transcription factor 1	9.28029	9.98503	9.70939	9.39472	10.3949	10.5404	9.87509	9.98558
Runx1t1	12395	Cbfa2t1h|ETO|MTG8	runt-related transcription factor 1; translocated to, 1 (cyclin D-related)	4.13143	3.85388	4.56819	2.9601	3.85107	4.54826	4.51558	3.91642
Cbl	12402	4732447J05Rik|Cbl-2|c-Cbl|cbl	Casitas B-lineage lymphoma	9.16438	8.52887	8.17624	8.23932	8.81455	8.80606	8.74226	8.7744
Ccna1	12427	-	cyclin A1	1.60787	2.56437	2.42135	1.9601	2.11411	2.34662	1.34566	3.43099
Ccna2	12428	AA408589|Ccn-1|Ccn1|Ccna|CycA2|Cyca	cyclin A2	11.4072	11.4179	11.2762	11.4365	11.6878	11.2827	11.7834	11.4589
Ccnd1	12443	AI327039|CycD1|Cyl-1|PRAD1|bcl-1|cD1	cyclin D1	12.4342	13.4594	13.213	13.4018	13.1406	12.3743	13.1105	12.4174
Ccnd2	12444	2600016F06Rik|AI256817|BF642806|C86853|Vin-1|Vin1|cD2	cyclin D2	9.74486	8.28623	8.58841	8.46789	9.30063	9.45096	9.31432	9.4906
Ccnd3	12445	9230106B05Rik|AA682053|AL024085|AW146355|C78795	cyclin D3	7.50874	7.36023	7.33509	7.41953	7.57354	7.31932	7.78028	7.27899
Ccne1	12447	AW538188|CycE1	cyclin E1	7.38923	7.50819	7.60268	7.54506	7.87787	7.7458	7.80509	7.60891
Ccne2	12448	-	cyclin E2	9.46585	9.53655	9.20832	9.35241	9.39333	8.64308	9.62178	9.05743
Cd14	12475	-	CD14 antigen	7.79274	8.24931	8.47197	8.23312	6.59523	6.53249	6.96037	6.66365
Cd19	12478	AW495831	CD19 antigen	-0.392131	0.979407	-0.386006	0.375134	0.529144	1.60966	1.34566	1.10906
Cdc25a	12530	D9Ertd393e	cell division cycle 25A	8.67933	9.01099	8.65565	8.69255	9.09139	8.86075	8.88093	8.97015
Cdc25b	12531	AI604853	cell division cycle 25B	8.17392	8.61603	8.75354	8.68347	8.71897	8.73894	8.84151	8.56849
Cdc25c	12532	Cdc25	cell division cycle 25C	7.56207	7.26481	7.36219	7.30587	7.98036	7.8256	7.42247	7.57667
Cdc7	12545	AI597260|Cdc7l1|muCdc7	cell division cycle 7 (S. cerevisiae)	7.17011	7.3888	6.91777	7.23312	6.52914	6.76616	7.16583	6.67892
Cdh1	12550	AA960649|E-cad|Ecad|L-CAM|UVO|Um	cadherin 1	2.77779	1.97941	1.93592	2.37513	3.11411	0.0246963	0.345656	2.91642
Cdk2	12566	A630093N05Rik	cyclin-dependent kinase 2	8.55624	8.86001	8.70939	8.78876	8.56806	8.33758	8.53053	8.50567
Cdk4	12567	Crk3	cyclin-dependent kinase 4	11.677	11.8054	11.8837	11.7272	11.9166	12.1462	11.7556	12.0144
Cdk6	12571	AI504062|Crk2	cyclin-dependent kinase 6	8.28735	9.10525	8.65017	8.83457	8.7239	8.29148	8.85345	8.39908
Cdkn1a	12575	CAP20|CDKI|CIP1|Cdkn1|P21|SDI1|Waf1|mda6|p21Cip1|p21WAF	cyclin-dependent kinase inhibitor 1A (P21)	10.565	11.0124	10.8601	10.9898	10.689	11.3055	11.0365	10.3112
Cdkn1b	12576	AA408329|AI843786|Kip1|p27|p27Kip1	cyclin-dependent kinase inhibitor 1B	10.2472	9.68216	9.71597	9.53501	9.77232	10.4447	9.65854	10.3735
Cdkn1c	12577	AL024410|CDKI|Kip2|p57(kip2)|p57Kip2	cyclin-dependent kinase inhibitor 1C (P57)	2.77779	2.2018	3.07343	2.69706	3.11411	3.34662	3.93062	3.10906
Cdkn2a	12578	ARF-INK4a|Arf|INK4a-ARF|Ink4a/Arf|MTS1|Pctr1|p16|p16(INK4a)|p16INK4a|p19<ARF>|p19ARF	cyclin-dependent kinase inhibitor 2A	-0.392131	1.97941	1.61399	1.37513	2.52914	1.60966	1.34566	2.69402
Cdkn2b	12579	AV083695|INK4b|MTS2|p15|p15(INK4b)|p15INK4b	cyclin-dependent kinase inhibitor 2B (p15, inhibits CDK4)	0.607869	0.979407	-0.386006	0.375134	0.529144	1.0247	1.93062	2.10906
Cdkn2c	12580	C77269|INK4c|p18|p18-INK4c|p18-INK6|p18INK4c	cyclin-dependent kinase inhibitor 2C (p18, inhibits CDK4)	10.821	10.5874	10.8094	10.3933	10.652	10.6311	10.294	10.7238
Cdkn2d	12581	INK4d|p19|p19INK4d	cyclin-dependent kinase inhibitor 2D (p19, inhibits CDK4)	8.00447	7.66123	7.56236	7.62306	7.12906	7.45096	7.24047	7.27899
Cebpa	12606	C/ebpalpha|CBF-A|Cebp	CCAAT/enhancer binding protein (C/EBP), alpha	7.65772	7.97941	8.31443	8.05461	7.87787	8.01338	7.64028	7.70152
Chad	12643	SLRR4A	chondroadherin	2.41522	1.39444	1.61399	2.69706	2.11411	2.34662	3.93062	4.63262
Chek1	12649	C85740|Chk1|rad27	checkpoint kinase 1	9.20592	8.56186	8.33509	8.57971	8.7239	8.36455	8.8964	8.73842
Chuk	12675	AI256658|Chuk1|Fbx24|Fbxo24|IKBKA|IKK1|Ikka|NFKBIKA	conserved helix-loop-helix ubiquitous kinase	10.2544	10.0879	9.97922	10.019	10.5093	10.4008	10.3244	10.2727
Socs3	12702	Cis3|Cish3|EF-10|Ef10|SSI-3|Ssi3	suppressor of cytokine signaling 3	6.83669	6.25243	5.88078	6.3975	4.43604	5.54826	4.86922	5.39446
Socs1	12703	Cish1|Cish7|JAB|SOCS-1|SSI-1	suppressor of cytokine signaling 1	7.26608	7.4872	7.00631	7.31765	7.36203	6.75262	6.77192	6.19652
Ccr7	12775	CC-CKR-7|CCR-7|CD197|Cdw197|Cmkbr7|EBI1|Ebi1h	chemokine (C-C motif) receptor 7	-0.392131	2.39444	-0.386006	1.9601	2.52914	2.0247	1.93062	1.69402
Cntfr	12804	Cntfralpha	ciliary neurotrophic factor receptor	1.19283	1.71637	1.93592	2.37513	2.52914	3.83205	2.34566	2.91642
Col11a1	12814	C530001D20Rik|cho	collagen, type XI, alpha 1	5.77779	5.0383	5.13756	4.9601	6.75796	7.37342	5.66758	7.27899
Col11a2	12815	-	collagen, type XI, alpha 2	2.60787	2.71637	2.78392	2.37513	2.52914	2.34662	3.51558	2.69402
Col2a1	12824	Col2|Col2a|Col2a-1|Del1|Dmm|Lpk|M100856|Rgsc856	collagen, type II, alpha 1	4.81732	4.67985	5.04026	4.69706	5.05271	5.3101	5.15301	5.23834
Col3a1	12825	AW550625|Col3a-1|MMS10-W|Ms10w|mKIAA4231	collagen, type III, alpha 1	8.18152	8.38029	8.84761	8.49407	6.52914	6.43409	6.17855	6.21759
Col4a3	12828	[a]3(IV)|alpha3(IV)	collagen, type IV, alpha 3	3.0673	3.56437	1.19896	1.37513	5.05271	5.57929	4.15301	4.86395
Col4a4	12829	E130010M05Rik|[a]4(IV)	collagen, type IV, alpha 4	3.19283	3.30134	3.07343	1.9601	3.85107	3.48413	3.15301	3.56849
Col4a5	12830	-	collagen, type IV, alpha 5	8.31868	8.65183	9.19896	8.30587	8.30393	8.91344	7.68551	8.64434
Col5a1	12831	AI413331	collagen, type V, alpha 1	8.17772	7.43336	7.23605	7.294	7.21564	7.15398	7.35688	7.29889
Col5a2	12832	1110014L14Rik|D230017N05	collagen, type V, alpha 2	6.40229	5.25243	4.8994	5.69706	6.05271	5.0247	6.10054	5.69402
Col1a1	12842	Col1a-1|Cola-1|Cola1|Mov-13|Mov13	collagen, type I, alpha 1	12.1591	11.3895	11.5205	11.1065	11.3268	11.3002	11.4364	11.5787
Col1a2	12843	AA960264|AI325291|Col1a-2|Cola-2|Cola2|oim	collagen, type I, alpha 2	7.8558	8.9605	8.51788	8.33514	5.95541	5.11216	6.94557	6.15346
Comp	12845	TSP5	cartilage oligomeric matrix protein	2.60787	1.71637	1.93592	1.37513	2.11411	2.34662	1.34566	2.10906
Crebbp	12914	AW558298|CBP|CBP/p300|KAT3A|p300/CBP	CREB binding protein	10.2679	9.86714	9.50274	9.62306	9.75556	9.66675	9.7614	9.90834
Csf1r	12978	AI323359|CD115|CSF-1R|Csfmr|Fim-2|Fms|M-CSF-R|M-CSFR	colony stimulating factor 1 receptor	2.9298	1.97941	1.61399	1.9601	2.85107	3.0247	2.93062	1.10906
Csf2	12981	Csfgm|GMCSF|Gm-CSf|MGI-IGM	colony stimulating factor 2 (granulocyte-macrophage)	-0.392131	1.97941	2.93592	2.37513	0.529144	2.34662	2.34566	0.109062
Csf2rb	12983	AI848964|AIC2B|Bc|CDw131|Csf2rb1|Csfgmrb|Il3r|Il3rb|Il3rb1|Il5rb	colony stimulating factor 2 receptor, beta, low-affinity (granulocyte-macrophage)	1.19283	1.39444	2.61399	1.37513	1.52914	2.0247	1.34566	0.109062
Csf3	12985	Csfg|G-CSF|MGI-IG	colony stimulating factor 3 (granulocyte)	1.9298	1.71637	3.42135	0.375134	3.85107	3.0247	3.51558	3.10906
Csf3r	12986	Cd114|Csfgr|G-CSF-R|G-CSFR	colony stimulating factor 3 receptor (granulocyte)	2.19283	2.56437	2.42135	3.18249	4.77707	3.34662	3.80509	3.69402
Smc3	13006	Bamacan|Cspg6|HCAP|Mmip1|SMC-3|SmcD	structural maintenance of chromosomes 3	11.5237	11.5464	11.293	11.4154	11.5284	11.2317	11.46	11.4666
Daxx	13163	-	Fas death domain-associated protein	6.33579	6.14933	6.16858	6.10305	5.98858	7.24387	6.32294	6.43099
Gadd45a	13197	AA545191|Ddit1|GADD45	growth arrest and DNA-damage-inducible 45 alpha	8.72421	9.27556	10.2008	9.27902	9.69907	10.6357	8.34566	10.053
Ddit3	13198	CHOP-10|CHOP10|chop|gadd153	DNA-damage inducible transcript 3	7.91165	8.11554	8.92006	8.43583	8.27734	9.96868	7.65854	8.98251
Dkk1	13380	mdkk-1	dickkopf homolog 1 (Xenopus laevis)	2.9298	3.56437	1.61399	2.9601	3.69907	3.19462	3.34566	3.27899
Dll1	13388	Delta1	delta-like 1 (Drosophila)	3.77779	4.2018	4.00631	3.9601	4.3365	4.93159	3.51558	4.43099
Dll3	13389	pu|pudgy	delta-like 3 (Drosophila)	2.19283	0.979407	-0.386006	0.375134	0.529144	1.60966	3.66758	1.69402
Dnmt1	13433	Cxxc9|Dnmt|Dnmt1o|MCMT|MTase|Met-1|Met1|MommeD2|m.MmuI	DNA methyltransferase (cytosine-5) 1	8.82946	8.51339	8.39535	8.40856	8.99267	8.47178	8.7076	8.82674
Dnmt3a	13435	MmuIIIA	DNA methyltransferase 3A	4.77779	4.56437	4.00631	3.9601	4.22958	5.27262	4.34566	4.19652
Dusp2	13537	PAC1	dual specificity phosphatase 2	-0.392131	-0.605555	1.61399	1.9601	3.69907	2.60966	0.345656	3.10906
Dvl1	13542	Dvl|mKIAA4029	dishevelled, dsh homolog 1 (Drosophila)	9.46118	9.4726	9.38052	9.41405	9.45692	9.74409	9.29402	9.59891
Dvl2	13543	-	dishevelled 2, dsh homolog (Drosophila)	7.76774	7.97565	8.20645	8.05461	8.3365	8.41701	7.69438	8.56027
Dvl3	13544	-	dishevelled 3, dsh homolog (Drosophila)	7.33579	7.12915	7.01487	7.22062	7.099	7.59455	7.21602	7.63262
E2f1	13555	E2F-1|mKIAA4009	E2F transcription factor 1	8.22625	8.24619	7.97155	8.34668	8.47751	8.05812	8.48008	8.46661
E2f5	13559	AU024671|E2F-5	E2F transcription factor 5	7.94326	7.50819	7.39535	7.49408	7.97209	8.56773	8.44369	7.9917
Lefty1	13590	AI450052|Ebaf|Leftb|Stra3|Tgfb4|lefty|lefty-1	left right determination factor 1	2.41522	2.2018	3.31443	2.37513	3.69907	2.83205	2.93062	3.10906
Efna1	13636	AI325262|B61|Efl1|Epl1|Eplg1|Lerk1	ephrin A1	9.45022	9.33696	9.73034	9.41405	9.81223	10.0091	9.40094	9.8986
Efna2	13637	CEK7L|Elf1|Epl6|Eplg6|Lerk6	ephrin A2	3.19283	2.85388	3.07343	2.69706	1.52914	2.83205	2.66758	2.91642
Efna3	13638	AW494418|EFL-2|Ehk1-L|Epl3|LERK-3	ephrin A3	3.51476	4.94903	4.93592	4.4626	4.92146	5.41701	4.73797	5.60091
Efna5	13640	AL-1|AV158822|EFL-5|Ephrin-A5|Epl7|LERK-7|RAGS	ephrin A5	7.9343	7.62806	7.76881	7.38636	8.3105	8.93159	7.93811	8.552
Egf	13645	AI790464	epidermal growth factor	4.41522	4.67985	4.13756	3.83457	3.69907	4.0247	4.98951	3.91642
Egfr	13649	9030024J15Rik|AI552599|Erbb|Errb1|Errp|Wa5|wa-2|wa2	epidermal growth factor receptor	4.60787	5.2018	4.8994	4.69706	4.69907	4.83205	5.43312	5.27899
Eif4ebp1	13685	4e-bp1|AA959816|PHAS-I	eukaryotic translation initiation factor 4E binding protein 1	12.3598	12.3419	12.5749	12.6948	12.5925	12.551	12.2477	12.4313
Elk1	13712	Elk-1	ELK1, member of ETS oncogene family	3.8558	3.71637	3.31443	2.9601	4.22958	3.34662	4.0461	3.91642
Endog	13804	-	endonuclease G	4.81732	5.2018	5.28642	5.32933	6.50642	6.75262	6.34566	6.64822
Epha2	13836	AW545284|Eck|Myk2|Sek-2|Sek2	Eph receptor A2	8.01726	8.13591	7.63636	7.92972	8.1585	7.31932	7.68551	7.06326
Epo	13856	-	erythropoietin	3.41522	2.85388	2.61399	2.69706	3.3365	3.60966	3.66758	2.91642
Epor	13857	-	erythropoietin receptor	2.41522	1.71637	2.42135	1.37513	3.52914	2.83205	2.34566	2.43099
Erbb2	13866	Erbb-2|HER-2|HER2|Neu|c-erbB2|c-neu|mKIAA3023	v-erb-b2 erythroblastic leukemia viral oncogene homolog 2, neuro/glioblastoma derived oncogene homolog (avian)	8.22992	8.16593	8.12179	8.15649	8.22263	8.18457	8.1722	8.33788
Erbb3	13867	C76256|Erbb-3|Erbb3r|Her3	v-erb-b2 erythroblastic leukemia viral oncogene homolog 3 (avian)	2.60787	1.71637	2.42135	1.9601	2.52914	2.83205	2.66758	3.27899
Ercc2	13871	AA407812|AU020867|AW240756|CXPD|Ercc-2|XPD	excision repair cross-complementing rodent repair deficiency, complementation group 2	7.93879	8.46053	8.15315	8.28802	8.38713	8.47178	8.27047	8.12587
Ercc3	13872	BTF2 p89|Ercc-3|XPB	excision repair cross-complementing rodent repair deficiency, complementation group 3	9.09972	8.99622	8.97813	9.04047	9.36203	9.27973	9.2283	9.26388
Etv1	14009	ER81|Etsrp81	ets variant 1	6.51476	7.08095	7.6419	7.04756	7.021	7.8639	6.36802	7.53533
Mecom	14013	D630039M04Rik|Evi-1|Evi1|Jbo|Mds|Mds1|Mds1-Evi1|Prdm3|Znfpr1b1	MDS1 and EVI1 complex locus	8.22992	7.1758	6.91777	7.01899	7.57354	7.30082	7.32294	7.36645
Eya1	14048	bor	eyes absent 1 homolog (Drosophila)	7.28029	7.97565	7.87138	7.31765	8.77232	9.08539	7.34566	9.00993
Ezh2	14056	Enx-1|Enx1h|KMT6|mKIAA4065	enhancer of zeste homolog 2 (Drosophila)	10.1872	10.0356	9.93592	10.0738	10.2121	10.2145	10.26	10.1778
Ptk2	14083	FAK|FRNK|Fadk|mKIAA4203|p125FAK	PTK2 protein tyrosine kinase 2	10.2571	10.3281	10.274	10.3337	10.2417	10.1591	10.0391	10.1161
Fanca	14087	AW208693|FACA	Fanconi anemia, complementation group A	6.93879	6.65183	6.63636	6.71498	7.08373	6.76616	6.80509	6.85053
Fancc	14088	Facc|mir-3074-1	Fanconi anemia, complementation group C	6.22258	6.14933	6.02338	6.07557	5.05271	4.88268	5.93062	4.91642
Fas	14102	AI196731|APO1|APT1|CD95|TNFR6|Tnfrsf6|lpr	Fas (TNF receptor superfamily member 6)	8.02993	7.62806	8.17241	7.76745	8.60061	8.67933	7.64028	8.90672
Fasl	14103	APT1LG1|CD178|CD95-L|CD95L|Fas-L|Faslg|Tnfsf6|gld	Fas ligand (TNF superfamily, member 6)	1.19283	0.979407	2.19896	1.37513	2.52914	0.0246963	0.345656	2.69402
Fen1	14156	AW538437|FEN-1	flap structure specific endonuclease 1	10.5722	10.4518	10.5088	10.5375	10.6597	10.2219	10.6195	10.4197
Fgf1	14164	Dffrx|Fam|Fgf-1|Fgfa	fibroblast growth factor 1	1.19283	1.71637	2.42135	0.375134	2.11411	2.0247	2.34566	2.10906
Fgf10	14165	AEY17|BB213776|Fgf-10|Gsfaey17	fibroblast growth factor 10	1.60787	2.2018	3.07343	2.9601	3.11411	2.34662	3.15301	2.69402
Fgf11	14166	Fgf-11|Fhf-3|Fhf3	fibroblast growth factor 11	1.9298	2.2018	2.19896	2.37513	2.52914	2.34662	1.34566	1.69402
Fgf12	14167	AV114868|B230343J05Rik|FGF-12|FHF-1|Fhf1	fibroblast growth factor 12	2.41522	1.71637	1.61399	1.9601	2.11411	1.60966	2.93062	2.10906
Fgf13	14168	Fhf2	fibroblast growth factor 13	2.41522	2.2018	1.93592	2.69706	4.11411	3.48413	3.93062	3.56849
Fgf14	14169	FHF-4|Fhf4|mFHF-4(1B)	fibroblast growth factor 14	4.30831	2.97941	3.07343	2.69706	3.52914	3.60966	4.34566	3.69402
Fgf15	14170	FGF19	fibroblast growth factor 15	2.9298	2.2018	2.42135	0.375134	3.3365	2.83205	1.34566	1.69402
Fgf17	14171	-	fibroblast growth factor 17	1.9298	2.56437	2.61399	1.37513	2.11411	3.0247	0.345656	0.109062
Fgf18	14172	D130055P09Rik|FGF-18	fibroblast growth factor 18	1.9298	2.56437	1.61399	1.37513	2.85107	2.34662	1.93062	2.69402
Fgf2	14173	Fgf-2|Fgfb|bFGF	fibroblast growth factor 2	3.60787	2.71637	3.42135	3.37513	4.11411	2.60966	3.66758	3.91642
Fgf3	14174	Fgf-3|Int-2|Int-P	fibroblast growth factor 3	-0.392131	-0.605555	0.613994	0.375134	1.52914	0.0246963	2.34566	0.109062
Fgf4	14175	Fgf-4|Fgfk|Hst1|Hstf-1|KS3|hst|hst-1|kFGF	fibroblast growth factor 4	3.19283	3.30134	2.93592	1.9601	3.98858	3.19462	4.15301	4.10906
Fgf5	14176	Fgf-5|HBGF-5|angora|go	fibroblast growth factor 5	2.77779	2.2018	3.19896	2.69706	3.52914	2.34662	2.93062	1.69402
Fgf6	14177	Fgf-6|HSTF-2	fibroblast growth factor 6	2.41522	1.39444	2.19896	1.9601	0.529144	2.0247	2.34566	2.69402
Fgf7	14178	Kgf	fibroblast growth factor 7	2.41522	2.39444	2.78392	2.9601	2.85107	3.19462	0.345656	3.27899
Fgf8	14179	Aigf|Fgf-8	fibroblast growth factor 8	3.69533	3.39444	3.31443	3.37513	3.69907	2.60966	3.15301	3.56849
Fgf9	14180	Eks	fibroblast growth factor 9	2.19283	2.2018	2.78392	1.37513	0.529144	2.34662	2.93062	2.43099
Fgfr1	14182	AW208770|Eask|FLG|Fgfr-1|Flt-2|Hspy|MFR|bFGF-R-1|c-fgr	fibroblast growth factor receptor 1	9.59513	9.56687	9.56382	9.52488	9.65068	9.84647	9.54041	9.46
Fgfr2	14183	AU043015|AW556123|Bek|Fgfr-2|Fgfr-7|Fgfr7|KGFR|KGFRTr|svs	fibroblast growth factor receptor 2	8.04666	6.55432	5.80382	6.32933	7.7386	7.45096	7.4646	7.97325
Fgfr3	14184	CD333|FR3|Fgfr-3|Flg-2|HBGFR|Mfr3|sam3	fibroblast growth factor receptor 3	4.00019	3.09488	4.00631	3.9601	3.11411	3.72514	3.51558	2.69402
Fgfr4	14186	Fgfr-4	fibroblast growth factor receptor 4	2.19283	1.39444	0.613994	2.69706	0.529144	2.60966	0.345656	0.109062
Figf	14205	AI325264|VEGF-D|Vegfd	c-fos induced growth factor	8.33238	8.23365	8.19519	8.18249	7.00488	6.53249	7.31144	7.01595
Flt1	14254	AI323757|Flt-1|VEGFR-1|VEGFR1|sFlt1	FMS-like tyrosine kinase 1	4.19283	2.71637	2.42135	2.37513	3.69907	3.48413	3.93062	4.10906
Flt3	14255	B230315G04|CD135|Flk-2|Flk2|Flt-3|Ly72|wmfl	FMS-like tyrosine kinase 3	1.19283	1.39444	0.613994	2.9601	1.52914	2.60966	0.345656	0.109062
Fn1	14268	E330027I09|Fn|Fn-1	fibronectin 1	12.9955	12.2717	12.3931	11.394	12.2622	13.563	11.6794	13.1437
Fos	14281	D12Rfj1|c-fos|cFos	FBJ osteosarcoma oncogene	4.36276	4.34864	3.86192	3.83457	3.69907	5.15398	5.0461	4.27899
Fosl1	14283	AW538199|Fra1|fra-1	fos-like antigen 1	9.26965	9.69136	9.52389	9.45994	10.6494	9.4923	9.73367	9.56233
Fst	14313	AL033346|FS	follistatin	6.00019	7.06687	6.63636	6.81808	5.7386	5.88268	6.27639	5.27899
Dtx1	14357	Fxit1|mKIAA4160	deltex 1 homolog (Drosophila)	2.77779	-0.605555	2.19896	0.375134	2.52914	2.34662	1.93062	3.10906
Fzd3	14365	AU020229|D930050A07Rik|Fz3	frizzled homolog 3 (Drosophila)	8.719	8.19534	8.11782	8.06862	8.02899	8.62461	8.25854	8.5142
Fzd7	14369	Fz7	frizzled homolog 7 (Drosophila)	7.39577	7.79105	8.07343	7.57481	7.21564	7.93159	7.31144	7.50994
Fzd8	14370	Fz8	frizzled homolog 8 (Drosophila)	4.73715	3.85388	3.61399	3.83457	4.22958	4.54826	3.51558	4.75292
Fzd9	14371	mfz9	frizzled homolog 9 (Drosophila)	5.25173	5.1758	5.56819	5.18249	5.43604	5.23415	5.0461	5.19652
Gas1	14451	AW554192|Gas-1	growth arrest specific 1	12.0323	9.78891	10.3136	9.26388	9.55705	10.3216	10.1674	10.2005
Gata1	14460	Gata-1|Gf-1|eryf1	GATA binding protein 1	2.19283	1.71637	3.07343	2.69706	3.11411	3.0247	3.34566	2.91642
Gata2	14461	Gata-2	GATA binding protein 2	5.38923	3.97941	5.04026	3.9601	3.85107	4.27262	4.15301	3.69402
Gata3	14462	Gata-3|jal	GATA binding protein 3	7.28029	7.9336	7.53286	7.63252	7.86899	8.49637	8.06676	8.36173
Ghr	14600	GHBP|GHR/BP	growth hormone receptor	7.96102	8.16923	8.2287	7.98246	7.97209	8.13844	7.82139	8.09206
Gli1	14632	AV235269|Zfp-5|Zfp5	GLI-Kruppel family member GLI1	1.60787	0.979407	2.61399	1.9601	2.85107	1.0247	1.93062	2.10906
Gli3	14634	AI854843|AU023367|Bph|GLI3-190|GLI3FL|Pdn|Xt|add	GLI-Kruppel family member GLI3	7.98725	8.00915	7.70146	7.52488	7.77707	7.63203	7.89255	7.82331
Gna11	14672	Dsk7|E430025L19	guanine nucleotide binding protein, alpha 11	9.70195	9.9268	9.74199	9.91235	9.58714	9.75091	9.61478	9.74206
Gnaq	14682	1110005L02Rik|6230401I02Rik|AA408290|AW060788|Dsk1|Dsk10|Galphaq|Gq|GqI	guanine nucleotide binding protein, alpha q polypeptide	9.00661	8.72536	8.98032	8.60875	9.25366	9.40624	8.89255	9.24349
Gnas	14683	5530400H20Rik|A930027G11Rik|C130027O20Rik|GPSA|GSP|Galphas|Gnas1|Gnasxl|Gs-alpha|Gsa|Nesp|Nesp55|Nespl|Oed-Sml|Oedsml|P1|P2|P3|PHP1A|PHP1B|POH|SCG6	GNAS (guanine nucleotide binding protein, alpha stimulating) complex locus	11.4328	11.0827	11.3312	11.1897	11.8238	12.2859	11.5447	11.9686
Gngt1	14699	G(y)1|Gng1	guanine nucleotide binding protein (G protein), gamma transducing activity polypeptide 1	-0.392131	1.39444	2.61399	2.37513	2.85107	2.0247	3.51558	2.43099
Gng12	14701	2010305F15Rik|AA536815|AI115529|AI314170|AI842738	guanine nucleotide binding protein (G protein), gamma 12	8.6191	8.56937	8.55063	8.57971	8.86453	8.92254	8.7207	8.70152
Gng2	14702	-	guanine nucleotide binding protein (G protein), gamma 2	5.22258	4.64237	4.47197	4.8987	5.65843	6.0247	5.29985	4.86395
Gng4	14706	-	guanine nucleotide binding protein (G protein), gamma 4	1.60787	2.56437	2.78392	1.37513	2.11411	1.60966	2.93062	2.43099
Gng7	14708	AI840417	guanine nucleotide binding protein (G protein), gamma 7	2.60787	2.39444	2.78392	3.9601	2.85107	2.83205	4.34566	3.69402
Lrp2	14725	AI315343|AW536255|D230004K18Rik|Gp330|Megalin|b2b1625.2Clo	low density lipoprotein receptor-related protein 2	2.60787	2.85388	1.61399	1.37513	3.52914	2.60966	3.66758	3.27899
Gpc4	14735	9530073D23Rik|AF311610|AI385680|AI661372|K-glypican	glypican 4	8.64404	7.69365	7.86666	7.61354	7.93002	8.31472	7.65854	8.09775
Grb2	14784	AA408164|Ash	growth factor receptor bound protein 2	11.6086	11.5023	11.3908	11.5044	11.02	11.045	10.8741	10.8706
Grin1	14810	GluN1|GluRdelta1|GluRzeta1|M100174|NMD-R1|NMDAR1|NR1|Nmdar|Rgsc174	glutamate receptor, ionotropic, NMDA1 (zeta 1)	2.19283	2.39444	2.19896	2.69706	2.85107	2.0247	3.51558	2.43099
Grin2a	14811	GluN2A|NMDAR2A|NR2A	glutamate receptor, ionotropic, NMDA2A (epsilon 1)	3.51476	2.2018	2.93592	2.69706	3.98858	3.72514	3.66758	3.43099
Grin2b	14812	AW490526|GluN2B|NR2B|Nmdar2b	glutamate receptor, ionotropic, NMDA2B (epsilon 2)	2.77779	1.71637	1.19896	2.37513	2.52914	2.0247	2.66758	0.109062
Cxcl1	14825	Fsp|Gro1|KC|Mgsa|N51|Scyb1|gro	chemokine (C-X-C motif) ligand 1	7.86996	7.96809	6.93592	7.70605	7.34932	6.91951	6.70321	5.89042
Gzmb	14939	AI553453|CCP-1/C11|CCP1|Ctla-1|Ctla1|GZB	granzyme B	1.19283	0.394445	-0.386006	1.37513	0.529144	2.0247	0.345656	1.69402
H3f3a	15078	H3.3A	H3 histone, family 3A	13.5817	13.4803	13.7531	13.5634	13.692	14.415	13.4878	14.0592
Hdac2	15182	D10Wsu179e|YAF1|Yy1bp|mRPD3	histone deacetylase 2	11.1796	11.0918	11.0036	11.0581	10.8657	10.9428	10.8465	10.8623
Hdac5	15184	AI426555|Hdac4|mHDA1|mKIAA0600	histone deacetylase 5	8.42485	8.32814	8.52987	8.2455	8.65843	9.08269	8.76772	9.23835
Hdac6	15185	Hd6|Hdac5|Sfc6|mHDA2	histone deacetylase 6	7.47205	7.78676	7.68546	7.90652	7.44801	7.66855	7.42247	7.82331
Hells	15201	AI323785|E130115I21Rik|LSH|Lysh|PASG|YFK8	helicase, lymphoid specific	11.0683	11.0274	10.7258	10.924	10.9523	10.4245	11.1163	10.7547
Hes1	15205	Hry|bHLHb39	hairy and enhancer of split 1 (Drosophila)	4.13143	4.52373	4.74328	4.37513	4.61661	4.34662	4.51558	4.35699
Hes5	15208	bHLHb38	hairy and enhancer of split 5 (Drosophila)	1.60787	0.394445	1.93592	1.9601	2.52914	3.0247	1.93062	3.10906
Hgf	15234	C230052L06Rik|HGF/SF|NK1|NK2|SF|SF/HGF	hepatocyte growth factor	1.9298	2.39444	1.93592	1.37513	2.85107	1.0247	2.66758	2.91642
Hhex	15242	Hex|Hex1|Hhex-rs2|Prh|Prhx	hematopoietically expressed homeobox	2.19283	2.56437	1.93592	2.37513	2.85107	2.60966	1.93062	1.69402
Hhip	15245	Hhip1	Hedgehog-interacting protein	2.41522	1.39444	1.93592	1.37513	3.11411	2.34662	2.93062	2.69402
H2afx	15270	AW228881|H2A.X|H2ax|Hist5-2ax|gammaH2ax	H2A histone family, member X	10.9472	11.3849	11.1686	11.2715	11.4731	11.2827	11.5392	11.0294
Hmga1	15361	AL023995|Hmga1a|Hmga1b|Hmgi|Hmgiy|Hmgy	high mobility group AT-hook 1	10.2336	10.3937	10.4897	10.5044	10.4993	9.9716	10.6414	10.0144
Hmga2	15364	9430083A20Rik|HMGI-C|Hmgic|pg|pygmy	high mobility group AT-hook 2	9.63991	10.6453	10.8289	10.2269	11.9798	11.2738	10.5624	11.3893
Nr4a1	15370	GFRP1|Gfrp|Hbr-1|Hbr1|Hmr|N10|NGFI-B|NGFIB|NP10|TIS1|TR3|nur77	nuclear receptor subfamily 4, group A, member 1	5.53861	5.25243	5.34191	5.18249	7.20157	6.59455	5.70321	7.45779
Hoxa10	15395	Hox-1.8|Hoxa-10	homeobox A10	6.17772	6.46053	6.73293	6.69706	6.20157	7.30082	6.4954	6.51845
Hoxa11	15396	Hox-1.9|Hoxa-11	homeobox A11	1.19283	0.394445	0.613994	0.375134	3.11411	2.83205	2.93062	2.69402
Hoxa9	15405	D6a9|Hox-1.7	homeobox A9	2.77779	3.2018	3.52088	3.18249	3.69907	4.0247	3.93062	4.27899
Hpgd	15446	15-PGDH|AV026552	hydroxyprostaglandin dehydrogenase 15 (NAD)	2.19283	1.39444	0.613994	2.69706	2.11411	2.0247	2.93062	1.10906
Hras	15461	H-ras|Ha-ras|Harvey-ras|Hras-1|Hras1|Kras2|c-H-ras|c-Ha-ras|c-rasHa|ras	Harvey rat sarcoma virus oncogene	10.3577	11.0202	11.1891	11.1606	10.7759	10.5225	10.7043	10.5185
Hspb1	15507	27kDa|Hsp25	heat shock protein 1	3.30831	2.71637	3.52088	1.9601	4.3365	3.19462	3.66758	3.27899
Hspa2	15512	70kDa|HSP70.2|HSP70A2|Hsp70-2	heat shock protein 2	3.19283	3.30134	2.78392	2.69706	3.3365	3.48413	4.34566	3.10906
Ibsp	15891	BSP|BSP II|BSPII|Bsp2	integrin binding sialoprotein	3.0673	2.97941	3.07343	0.375134	3.98858	2.60966	3.51558	3.56849
Id1	15901	AI323524|D2Wsu140e|Idb1|bHLHb24	inhibitor of DNA binding 1	9.48745	10.4022	9.51335	10.1841	10.5598	10.3756	10.5106	9.7744
Id2	15902	AI255428|C78922|Idb2|bHLHb26	inhibitor of DNA binding 2	11.8936	11.744	10.6495	11.4784	11.2799	9.90887	11.4417	10.3209
Id4	15904	Idb4|bHLHb27	inhibitor of DNA binding 4	2.41522	1.71637	2.78392	0.375134	1.52914	2.83205	3.15301	1.10906
Idh1	15926	AI314845|AI788952|E030024J03Rik|Id-1|Idh-1|Idpc	isocitrate dehydrogenase 1 (NADP+), soluble	8.88166	9.15267	9.60693	9.31177	9.39333	10.5764	8.38457	10.2664
Ifna1	15962	Ifa1	interferon alpha 1	2.19283	2.97941	3.42135	2.37513	3.3365	3.19462	3.66758	3.43099
Ifnar1	15975	CD118|Ifar|Ifnar|Ifrc|Infar	interferon (alpha and beta) receptor 1	8.45336	8.60633	8.97594	8.76315	8.56257	9.29382	8.43312	8.9917
Ifnar2	15976	AI747302|Ifnar-2	interferon (alpha and beta) receptor 2	7.36276	7.48191	7.61399	7.53501	7.59523	8.14364	7.7207	7.87061
Ifnb1	15977	IFN-beta|IFNB|Ifb	interferon beta 1, fibroblast	-0.392131	-0.605555	-0.386006	0.375134	0.529144	0.0246963	0.345656	0.109062
Ifng	15978	IFN-g|Ifg	interferon gamma	3.0673	0.979407	2.19896	0.375134	3.3365	2.83205	3.15301	1.69402
Igf1	16000	C730016P09Rik|Igf-1|Igf-I	insulin-like growth factor 1	3.19283	1.71637	1.93592	2.69706	0.529144	1.60966	2.66758	2.43099
Igf1r	16001	A330103N21Rik|CD221|D930020L01|IGF-1R|hyft	insulin-like growth factor I receptor	9.33238	8.93166	8.66928	8.55504	9.74346	9.39974	9.70101	9.56849
Igfbp3	16009	AI649005|IGFBP-3|IGgfbp3	insulin-like growth factor binding protein 3	3.0673	3.30134	3.42135	2.9601	4.61661	3.48413	4.15301	4.01595
Ikbkb	16150	AI132552|IKK-2|IKK-beta|IKK2|IKK[b]|IKKbeta	inhibitor of kappaB kinase beta	8.7059	8.71637	8.80135	8.93355	8.78653	8.94058	8.60775	8.67892
Ikbkg	16151	1110037D23Rik|AI848108|AI851264|AW124339|IKK[g]|NEMO	inhibitor of kappaB kinase gamma	7.75253	7.06687	7.16858	6.78452	6.63767	7.61715	6.98951	7.29889
Il10	16153	CSIF|Il-10	interleukin 10	1.60787	1.71637	1.19896	1.9601	2.11411	2.83205	1.93062	1.10906
Il11	16156	IL-11	interleukin 11	2.19283	1.71637	1.93592	3.37513	2.52914	1.60966	3.34566	2.69402
Il11ra1	16157	AI314697|GP130|Il-11ra|Il11ra|Il11ra2|NR1	interleukin 11 receptor, alpha chain 1	1.9298	1.39444	1.19896	1.9601	2.52914	2.34662	2.66758	1.10906
Il11ra2	16158	ENSMUSG00000066201|Etl-2|Etl2|Il11ra-ps1	interleukin 11 receptor, alpha chain 2	0.607869	1.71637	1.93592	1.9601	2.11411	2.34662	2.34566	2.10906
Il12a	16159	IL-12p35|Il-12a|Ll12a|p35	interleukin 12a	2.41522	2.2018	2.61399	1.9601	3.98858	2.60966	3.15301	2.10906
Il12b	16160	Il-12b|Il-12p40|Il12p40|p40	interleukin 12b	2.60787	2.39444	2.19896	1.9601	2.85107	3.34662	3.15301	2.69402
Il12rb2	16162	A930027I18Rik|IL-12RB2|Ifnm	interleukin 12 receptor, beta 2	3.51476	3.91801	3.78392	3.37513	4.11411	3.60966	4.15301	3.43099
Il13	16163	Il-13	interleukin 13	2.60787	2.56437	1.61399	2.37513	2.52914	2.0247	3.66758	2.69402
Il13ra2	16165	CD213a2|IL-13R-alpha-2	interleukin 13 receptor, alpha 2	3.0673	2.56437	4.00631	2.69706	3.11411	3.19462	3.80509	3.56849
Il15	16168	AI503618|IL-15	interleukin 15	2.60787	3.2018	3.78392	2.9601	2.52914	3.93159	2.93062	3.8095
Il1a	16175	Il-1a	interleukin 1 alpha	3.0673	2.39444	3.42135	0.375134	0.529144	2.60966	2.34566	2.10906
Il1b	16176	IL-1beta|Il-1b	interleukin 1 beta	1.9298	1.97941	1.61399	2.69706	3.3365	0.0246963	2.93062	1.69402
Il1r1	16177	CD121a|CD121b|IL-1R1|IL-iR|Il1r-1	interleukin 1 receptor, type I	6.42805	6.65183	6.60268	6.54506	5.77707	5.23415	5.80509	5.53533
Il1r2	16178	CD121b|Il1r-2	interleukin 1 receptor, type II	2.9298	2.56437	2.19896	3.37513	3.85107	2.60966	3.66758	3.27899
Il1rap	16180	6430709H04Rik|AI255955|AV239853|IL-1RAcP	interleukin 1 receptor accessory protein	7.26608	7.12915	7.52088	6.66054	7.69907	7.78625	7.67657	7.53533
Il2	16183	Il-2	interleukin 2	0.607869	1.71637	1.19896	0.375134	0.529144	2.60966	2.93062	0.109062
Il2ra	16184	CD25|Il2r|Ly-43	interleukin 2 receptor, alpha chain	3.0673	3.09488	2.42135	2.37513	3.98858	2.83205	3.80509	3.10906
Il2rb	16185	CD122|IL-15Rbeta|IL15Rbeta|Il-2/15Rbeta|Il-2Rbeta|p70	interleukin 2 receptor, beta chain	4.65226	3.64237	4.52088	3.69706	2.52914	3.34662	2.66758	2.91642
Il3	16187	BPA|Csfmu|HCGF|Il-3|MCGF|PSF	interleukin 3	-0.392131	2.39444	1.61399	0.375134	2.11411	1.60966	2.66758	0.109062
Il3ra	16188	CD123|CDw123|SUT-1	interleukin 3 receptor, alpha chain	1.19283	1.97941	1.61399	1.37513	1.52914	2.0247	1.34566	0.109062
Il4	16189	BSF-1|Il-4	interleukin 4	0.607869	2.71637	1.19896	2.9601	2.85107	1.60966	2.34566	2.91642
Il5ra	16192	CD125|CDw125|Il5r	interleukin 5 receptor, alpha	-0.392131	-0.605555	0.613994	2.37513	0.529144	0.0246963	0.345656	2.10906
Il6	16193	Il-6	interleukin 6	2.41522	0.979407	1.19896	2.69706	3.69907	2.60966	2.66758	2.10906
Il6ra	16194	CD126|IL-6R|IL-6R-alpha|IL-6RA|Il6r	interleukin 6 receptor, alpha	7.38266	7.33696	7.47818	7.08938	8.20157	7.60966	7.91551	8.00993
Il7	16196	A630026I06Rik|Il-7|hlb368	interleukin 7	3.19283	4.85388	5.54473	4.76745	4.22958	4.54826	4.80509	4.63262
Il7r	16197	CD127|IL-7Ralpha	interleukin 7 receptor	2.19283	1.39444	2.61399	1.9601	2.11411	1.0247	1.93062	2.43099
Inhba	16323	-	inhibin beta-A	9.54598	8.55179	7.95384	8.37513	8.10657	7.39974	8.43312	7.60891
Inhbb	16324	-	inhibin beta-B	2.41522	-0.605555	2.42135	1.37513	0.529144	1.60966	1.93062	1.69402
Insr	16337	4932439J01Rik|CD220|D630014A15Rik|IR|IR-A|IR-B	insulin receptor	6.11566	5.00915	5.34191	5.18249	5.85107	6.57929	5.77192	6.23834
Irs1	16367	G972R|IRS-1	insulin receptor substrate 1	6.72681	6.752	6.71203	6.58459	7.43604	7.83848	7.20364	7.72377
Itga2	16398	CD49B|DX5	integrin alpha 2	4.96542	5.22733	5.04026	5.01899	4.77707	3.93159	4.43312	4.56849
Itga3	16400	AA407068|CD49C|GAPB3	integrin alpha 3	11.161	10.731	10.4665	10.53	11.3373	10.7645	11.053	10.9083
Itga6	16403	5033401O05Rik|AI115430|Cd49f|VLA-6	integrin alpha 6	9.63439	9.49116	9.36219	9.57726	9.39023	9.18204	9.52557	9.09206
Itga7	16404	[a]7|alpha7	integrin alpha 7	3.41522	3.09488	3.61399	3.54506	2.85107	4.19462	3.34566	2.91642
Itgb3	16416	CD61|GP3A|INGRB3	integrin beta 3	3.41522	3.56437	2.93592	3.54506	3.85107	4.0247	4.15301	3.91642
Itgb6	16420	2210409C20Rik|4831415H04Rik	integrin beta 6	2.60787	-0.605555	2.61399	1.9601	2.11411	2.0247	2.66758	2.43099
Itgb7	16421	Ly69	integrin beta 7	5.13143	6.95669	6.52088	6.91429	5.173	4.72514	5.98951	5.35699
Jag1	16449	ABE2|Gsfabe2|Htu|Ozz|Ser-1	jagged 1	5.33579	5.41681	5.28642	5.28202	5.77707	6.32848	6.0461	6.25881
Jag2	16450	D12Ggc2e|Serh|mJagged2-1|sm	jagged 2	3.30831	1.97941	1.93592	0.375134	1.52914	2.0247	3.15301	2.10906
Jak1	16451	AA960307|BAP004|C130039L05Rik	Janus kinase 1	10.1226	10.1241	10.002	9.91817	10.3949	10.6568	10.2969	10.528
Jak2	16452	Fd17	Janus kinase 2	7.60787	7.40007	7.59699	7.31765	7.98858	8.75262	7.90024	8.42647
Jak3	16453	fae|wil	Janus kinase 3	5.03413	4.82071	4.31443	4.4626	4.43604	5.69712	4.80509	5.06326
Jun	16476	AP-1|Junc|c-jun	jun proto-oncogene	9.44865	9.48323	9.21205	9.55753	9.49493	9.95691	9.54041	9.47101
Kdr	16542	6130401C07|Flk-1|Flk1|Krd-1|Ly73|VEGFR-2|VEGFR2|sVEGFR-2	kinase insert domain protein receptor	3.0673	2.97941	3.19896	3.83457	4.22958	3.0247	3.80509	3.43099
Kit	16590	Bs|CD117|Fdc|Gsfsco1|Gsfsco5|Gsfsow3|SCO1|SCO5|SOW3|Ssm|Tr-kit|W|c-KIT	kit oncogene	4.60787	5.12237	4.74328	3.69706	4.85107	5.11216	5.15301	5.19652
Klf4	16600	EZF|Gklf|Zie	Kruppel-like factor 4 (gut)	8.54745	8.78891	9.44213	8.92588	10.4569	9.89814	9.30566	10.082
Kras	16653	AI929937|K-ras|Ki-ras|Kras-2|Kras2|p21B|ras	v-Ki-ras2 Kirsten rat sarcoma viral oncogene homolog	7.17772	6.25243	6.49664	6.54506	7.099	7.45932	7.14007	7.38519
Stmn1	16765	19k|Lag|Lap18|Op18|P18|P19|Pig|Pp17|Pp18|Pp19|Pr22|Smn	stathmin 1	12.0806	12.0744	12.2326	11.9596	11.8955	12.1508	11.5906	11.9783
Lama1	16772	AA408497|Lama	laminin, alpha 1	1.19283	2.2018	0.613994	0.375134	0.529144	3.0247	0.345656	2.91642
Lama3	16774	Lama3B|[a]3B	laminin, alpha 3	-0.392131	-0.605555	-0.386006	1.37513	0.529144	0.0246963	0.345656	0.109062
Lama5	16776	AA408760|AA408762|AI853660|[a]5|laminin-511|mKIAA0533	laminin, alpha 5	8.81732	8.64474	8.36888	8.41405	9.14385	9.43621	9.20984	9.43324
Lamb3	16780	-	laminin, beta 3	5.41522	5.09488	4.74328	5.8987	4.22958	3.60966	4.73797	4.75292
Lamc2	16782	AA589349	laminin, gamma 2	4.19283	3.30134	4.47197	3.18249	3.98858	3.72514	4.73797	3.91642
Lat	16797	-	linker for activation of T cells	2.9298	1.97941	1.61399	1.37513	3.85107	3.19462	2.66758	2.69402
Lef1	16842	3000002B05|AI451430|Lef-1	lymphoid enhancer binding factor 1	4.00019	4.752	5.49664	5.41953	5.173	6.15398	4.86922	5.9917
Lep	16846	ob|obese	leptin	2.19283	2.2018	3.07343	3.18249	3.85107	2.0247	3.66758	3.27899
Lepr	16847	LEPROT|Leprb|Modb1|OB-RGRP|Obr|db|diabetes|obese-like|obl	leptin receptor	3.19283	3.30134	2.93592	2.37513	4.22958	3.48413	3.66758	4.27899
Lfng	16848	AW061165	LFNG O-fucosylpeptide 3-beta-N-acetylglucosaminyltransferase	7.55038	9.10869	8.84041	8.96385	6.50642	7.16425	7.41175	6.69402
Lif	16878	-	leukemia inhibitory factor	7.47205	8.12915	7.81856	7.88293	9.58984	8.96133	7.26452	8.0398
Lifr	16880	A230075M04Rik|AW061234|LIF	leukemia inhibitory factor receptor	3.41522	2.71637	3.19896	2.69706	3.69907	3.34662	3.15301	2.91642
Smad1	17125	AI528653|Madh1|Madr1|Mlp1|MusMLP	SMAD family member 1	8.35606	8.47393	8.63636	8.31177	8.73372	8.94058	8.24047	8.71269
Smad2	17126	7120426M23Rik|Madh2|Madr2|Smad-2|mMad2	SMAD family member 2	7.77278	7.71637	7.84761	7.71498	8.04484	7.96721	7.73797	7.97325
Smad3	17127	AU022421|Madh3	SMAD family member 3	8.98508	9.0401	9.19519	8.83046	10.1402	10.5206	8.8335	10.5332
Smad4	17128	AW743858|D18Wsu70e|DPC4|Madh4	SMAD family member 4	9.69798	9.41404	9.47818	9.42498	9.60863	9.62832	9.64257	9.60292
Mcm2	17216	AA959861|AW476101|BM28|CDCL1|Mcmd2|mKIAA0030	minichromosome maintenance deficient 2 mitotin (S. cerevisiae)	9.66586	9.31926	9.24699	9.294	9.63243	9.07726	9.66758	9.40827
Mcm4	17217	19G|AI325074|AU045576|Cdc21|Mcmd4|mKIAA4003|mcdc21	minichromosome maintenance deficient 4 homolog (S. cerevisiae)	12.1924	11.8204	11.4963	11.7765	11.6106	10.9998	11.5805	11.3415
Mcm5	17218	AA617332|AI324988|AL033333|Cdc46|Mcmd5|P1-CDC46	minichromosome maintenance deficient 5, cell division cycle 46 (S. cerevisiae)	7.69002	7.8123	7.53881	7.69706	7.69907	6.62461	7.60304	7.38519
Mcm7	17220	AI747533|Mcmd7|mCDC47	minichromosome maintenance deficient 7 (S. cerevisiae)	11.7336	11.8605	11.713	11.8504	11.7072	11.2299	11.5243	11.4628
Mdm2	17246	1700007J15Rik|AA415488|Mdm-2	transformed mouse 3T3 cell double minute 2	9.15862	9.93748	9.60126	9.63252	9.60061	9.41916	9.53548	9.14248
Men1	17283	AW045611	multiple endocrine neoplasia 1	8.3925	8.59412	8.50274	8.66515	8.24339	8.76279	8.63567	8.65596
Met	17295	AI838057|HGF|HGFR|Par4|c-Met	met proto-oncogene	10.2759	9.90026	9.69214	9.68347	10.1475	10.3612	10.2359	10.3391
Mfng	17305	AW546563	MFNG O-fucosylpeptide 3-beta-N-acetylglucosaminyltransferase	3.0673	3.56437	3.31443	2.37513	3.85107	3.0247	4.25255	4.10906
Kitl	17311	Clo|Con|Gb|Kitlg|Mgf|SCF|SF|SLF|Sl|blz|contrasted	kit ligand	10.9219	10.9136	10.6618	10.7866	10.6533	10.2903	10.681	10.3747
Mgmt	17314	AGT|AI267024|Agat	O-6-methylguanine-DNA methyltransferase	3.0673	1.97941	1.93592	0.375134	2.52914	2.0247	2.34566	2.43099
Mlf1	17349	HLS7	myeloid leukemia factor 1	3.69533	3.30134	3.86192	1.37513	2.85107	3.60966	3.66758	4.35699
Mlh1	17350	1110035C23Rik|AI317206|AI325952|AI561766	mutL homolog 1 (E. coli)	7.97419	7.97941	7.75865	7.64192	7.81455	7.88888	7.89255	7.85053
Mllt4	17356	5033403D15Rik|AF6|Af-6|Afadin|Gm314|I-afadin|S-afadin|Afdn	myeloid/lymphoid or mixed-lineage leukemia (trithorax homolog, Drosophila); translocated to, 4	10.0289	9.54038	9.40841	9.40027	10.2156	10.2451	10.0719	10.211
Mmp3	17392	EMS-2|MMP-3|SL-1|SLN-1|SLN1|STR-1|Stmy1|Str1	matrix metallopeptidase 3	4.25173	4.94903	5.49664	4.4626	5.05271	5.83205	4.80509	4.63262
Mmp7	17393	MAT	matrix metallopeptidase 7	1.60787	1.71637	-0.386006	1.9601	0.529144	1.0247	0.345656	2.10906
Mmp9	17395	AW743869|B/MMP9|Clg4b|MMP-9|pro-MMP-9	matrix metallopeptidase 9	4.13143	3.97941	3.93592	3.83457	5.11411	4.0247	4.80509	3.91642
Mnat1	17420	E130115E11Rik|MAT1|P36	menage a trois 1	9.17583	9.13591	9.30922	9.24241	9.19803	9.14882	8.94185	9.12865
Mpl	17480	CD110|TPO-R|c-mpl|hlb219	myeloproliferative leukemia virus oncogene	2.41522	1.97941	1.61399	1.37513	3.11411	0.0246963	3.93062	3.56849
Mpo	17523	mKIAA4033	myeloperoxidase	3.69533	2.2018	3.52088	3.18249	4.11411	4.0247	3.34566	3.10906
Msh2	17685	AI788990	mutS homolog 2 (E. coli)	9.3527	8.86409	8.68546	9.05461	8.97209	9.01338	9.0461	8.90996
Msh6	17688	AU044881|AW550279|GTBP|Gtmbp	mutS homolog 6 (E. coli)	10.7557	10.4819	10.388	10.4168	10.2588	10.1553	10.6933	10.3306
Mapt	17762	AI413597|AW045860|Mtapt|Tau	microtubule-associated protein tau	3.30831	3.48191	3.52088	3.37513	3.11411	5.06909	4.0461	4.69402
Myb	17863	AI550390|M16449|c-myb	myeloblastosis oncogene	-0.392131	2.71637	-0.386006	1.37513	2.52914	1.60966	1.34566	1.10906
Myc	17869	AU016757|Myc2|Niard|Nird|bHLHe39	myelocytomatosis oncogene	9.81366	10.2194	9.38052	10.0511	10.2723	9.6504	9.94928	9.47538
Gadd45b	17873	AI323528|Myd118	growth arrest and DNA-damage-inducible 45 beta	9.77654	9.6124	9.78642	9.54004	9.99675	9.40191	10.0938	9.81642
Myd88	17874	-	myeloid differentiation primary response gene 88	7.33579	8.21143	8.50578	7.98984	8.26385	8.65769	7.61244	8.45779
Nf1	18015	AW494271|E030030H24Rik|Nf-1	neurofibromatosis 1	8.29787	8.25863	8.18005	7.89083	8.06053	8.26787	8.16584	8.36645
Nf2	18016	merlin	neurofibromatosis 2	9.24449	9.27861	9.18195	9.12668	9.54037	9.96721	9.05646	9.63849
Nfatc1	18018	2210017P03Rik|AI449492|AV076380|NF-ATc|NFAT2|NFATc|Nfatcb	nuclear factor of activated T cells, cytoplasmic, calcineurin dependent 1	7.2732	6.89429	7.04862	6.91429	6.97209	6.36455	6.82139	7.00388
Nfe2l2	18024	Nrf2	nuclear factor, erythroid derived 2, like 2	7.32897	7.66123	7.96714	7.53501	7.86006	8.28679	7.45418	8.15346
Nfkb1	18033	NF-KB1|NF-kappaB|NF-kappaB1|p105|p50|p50/p105	nuclear factor of kappa light polypeptide gene enhancer in B cells 1, p105	9.70722	9.46457	9.47973	9.46525	9.97001	10.0526	9.81122	9.94984
Nfkbia	18035	AI462015|Nfkbi	nuclear factor of kappa light polypeptide gene enhancer in B cells inhibitor, alpha	9.54303	10.5436	10.4019	10.5044	10.398	10.3228	10.0753	10.4366
Ngf	18049	Ngfb	nerve growth factor	2.41522	2.97941	3.61399	2.69706	3.52914	2.60966	3.80509	3.10906
Ngfr	18053	LNGFR|Tnfrsf16|p75|p75NGFR|p75NTR	nerve growth factor receptor (TNFR superfamily, member 16)	2.9298	2.71637	2.93592	1.9601	3.11411	3.0247	3.51558	0.109062
Mycn	18109	N-myc|Nmyc|Nmyc-1|Nmyc1|bHLHe37|c-nmyc	v-myc myelocytomatosis viral related oncogene, neuroblastoma derived (avian)	2.41522	-0.605555	0.613994	1.37513	1.52914	1.60966	2.66758	0.109062
Nodal	18119	Tg.413d	nodal	0.607869	2.56437	1.61399	2.37513	1.52914	1.60966	1.34566	2.91642
Nog	18121	-	noggin	6.03413	2.2018	2.19896	3.18249	4.22958	4.41701	5.25255	5.01595
Nr4a3	18124	AI573420|CHN|CSMF|MINOR|NOR-1|Nor1|TEC	nuclear receptor subfamily 4, group A, member 3	2.41522	1.39444	3.07343	1.37513	3.11411	3.83205	2.66758	4.56849
Nos3	18127	2310065A03Rik|Nos-3|eNOS|ecNOS	nitric oxide synthase 3, endothelial cell	3.30831	3.48191	3.19896	3.18249	4.11411	4.19462	4.25255	3.91642
Notch1	18128	9930111A19Rik|Mis6|N1|Tan1|lin-12	notch 1	6.32211	6.54419	6.34191	5.8987	6.38713	7.30082	6.57447	7.28897
Notch2	18129	AI853703|N2	notch 2	8.32555	8.24931	8.14147	7.81808	8.57899	8.95839	8.74654	8.97943
Notch3	18131	AW229011|N3|hpbk	notch 3	1.19283	0.394445	1.61399	2.9601	2.11411	2.60966	0.345656	1.69402
Npm1	18148	B23|NO38|Npm	nucleophosmin 1	14.8312	14.9055	14.6677	14.9072	14.6331	14.1849	14.707	14.2369
Nras	18176	AV095280|N-ras	neuroblastoma ras oncogene	10.3468	10.1913	10.1724	10.1793	10.6126	10.5831	10.4878	10.4971
Nsd1	18193	AI528500|KMT3B	nuclear receptor-binding SET-domain protein 1	3.0673	2.56437	2.19896	0.375134	3.69907	2.83205	3.34566	3.10906
Ntf3	18205	AI316846|AI835689|Nt3|Ntf-3	neurotrophin 3	1.19283	0.394445	-0.386006	1.9601	0.529144	2.60966	2.66758	2.91642
Nthl1	18207	Nth1|Octs3	nth (endonuclease III)-like 1 (E.coli)	6.56207	6.69823	6.89012	6.54506	6.98858	6.81911	6.7207	6.86395
Ntrk1	18211	C80751|Tkr|TrkA|trk	neurotrophic tyrosine kinase, receptor, type 1	0.607869	2.56437	2.93592	2.9601	2.85107	0.0246963	2.34566	2.43099
Ntrk2	18212	GP145-TrkB/GP95-TrkB|Tkrb|trk-B|trkB	neurotrophic tyrosine kinase, receptor, type 2	2.77779	1.39444	1.19896	1.9601	2.85107	2.0247	2.34566	2.43099
Dusp8	18218	5530400B01Rik|AI593498|Nttp1	dual specificity phosphatase 8	5.71639	5.62326	5.13756	5.69706	4.77707	5.38225	5.51558	4.50138
Numbl	18223	nbl	numb-like	6.99157	6.16263	6.04026	6.92972	6.85107	6.96721	7.0461	6.75292
Osm	18413	OncoM	oncostatin M	3.51476	2.71637	3.61399	4.28202	3.3365	3.83205	4.73797	3.91642
Pak3	18481	PAK-3|Pak65alpha|Pak65beta|Stk4	p21 protein (Cdc42/Rac)-activated kinase 3	8.2152	8.35445	8.41166	8.32933	8.16577	8.57544	7.78028	8.42647
Pax3	18505	Pax-3|Sp|Splchl2|splotch	paired box 3	1.9298	2.39444	2.19896	0.375134	0.529144	3.0247	3.15301	1.10906
Pax5	18507	BSAP|EBB-1|KLP|Pax-5	paired box 5	1.9298	1.39444	2.19896	2.37513	2.52914	3.19462	2.93062	2.69402
Pax8	18510	Pax-8	paired box 8	3.19283	2.2018	2.93592	2.9601	3.69907	2.83205	4.15301	4.01595
Pbx1	18514	2310056B04Rik|D230003C07Rik|Pbx-1	pre B cell leukemia homeobox 1	9.99696	9.40427	9.36219	9.24241	9.89109	10.3668	9.53795	10.211
Pbx3	18516	-	pre B cell leukemia homeobox 3	8.10372	8.20823	8.26863	8.28802	8.24339	8.32848	8.28229	8.37585
Kat2b	18519	A930006P13Rik|AI461839|AW536563|Pcaf|p/CAF	K(lysine) acetyltransferase 2B	8.98291	8.72536	8.84041	8.73269	8.93002	9.41271	8.46978	9.10342
Pck1	18534	AI265463|PEPCK|Pck-1	phosphoenolpyruvate carboxykinase 1, cytosolic	1.9298	2.2018	1.19896	2.37513	1.52914	2.34662	3.15301	1.10906
Pcna	18538	-	proliferating cell nuclear antigen	12.2281	12.4078	12.4098	12.4432	12.6159	12.2198	12.442	12.351
Pdgfa	18590	-	platelet derived growth factor, alpha	9.53713	9.6948	9.73034	9.72828	9.39951	9.62832	9.55267	9.26388
Pdgfb	18591	PDGF-B|Sis	platelet derived growth factor, B polypeptide	7.40877	8.40287	8.32824	8.56496	9.22263	8.64675	8.68105	8.96393
Pdgfra	18595	AI115593|CD140a|Pdgfr-2	platelet derived growth factor receptor, alpha polypeptide	8.38595	8.27403	9.12772	8.19531	8.97623	9.70065	7.81326	10.0849
Pdgfrb	18596	AI528809|CD140b|PDGFR-1|Pdgfr	platelet derived growth factor receptor, beta polypeptide	7.77278	5.80384	6.13756	4.9601	6.86899	6.95543	6.29985	7.46661
Etv4	18612	AW414408|Pea-3|Pea3	ets variant 4	7.60222	8.81651	8.92688	8.85895	8.30393	8.57159	8.33434	8.31363
Pgf	18654	AI854365|PIGF|Plgf	placental growth factor	7.37605	6.12237	6.56819	6.4626	8.56806	8.99048	6.39005	8.33306
Pik3ca	18706	6330412C24Rik|caPI3K|p110|p110alpha	phosphatidylinositol 3-kinase, catalytic, alpha polypeptide	9.14897	8.85183	9.00416	8.81808	9.51499	9.85759	9.35128	9.71639
Pik3cd	18707	2410099E07Rik|2610208K16Rik|AW545373|p110delta	phosphatidylinositol 3-kinase catalytic delta polypeptide	2.60787	3.71637	4.07343	3.83457	3.85107	3.48413	3.34566	3.69402
Pik3r1	18708	PI3K|p50alpha|p55alpha|p85alpha	phosphatidylinositol 3-kinase, regulatory subunit, polypeptide 1 (p85 alpha)	9.47977	9.75748	9.76374	9.31765	8.75796	8.84806	8.59832	9.28149
Pik3r2	18709	p85beta	phosphatidylinositol 3-kinase, regulatory subunit, polypeptide 2 (p85 beta)	9.73199	9.72536	10.0382	9.81808	9.82606	10.3432	9.46978	10.1452
Pik3r3	18710	AA414954|p55pik	phosphatidylinositol 3 kinase, regulatory subunit, polypeptide 3 (p55)	8.77278	8.5263	8.73553	8.21434	8.99267	9.89506	8.32294	9.88714
Pim1	18712	Pim-1	proviral integration site 1	4.30831	4.78676	4.82345	4.69706	5.69907	4.93159	4.80509	5.19652
Pitx2	18741	9430085M16Rik|Brx1|Brx1b|Munc30|Otlx2|Ptx2|Rieg	paired-like homeodomain transcription factor 2	3.69533	2.56437	2.42135	2.37513	3.98858	4.0247	3.51558	3.27899
Prkaca	18747	PKCD|Pkaca	protein kinase, cAMP dependent, catalytic, alpha	10.4627	10.2571	10.33	10.2362	10.3072	10.317	10.0216	10.3319
Prkacb	18749	CbPKA|Pkacb	protein kinase, cAMP dependent, catalytic, beta	9.08157	8.92192	8.95162	9.01176	9.28403	9.61154	9.02865	9.28648
Prkca	18750	AI875142|Pkca	protein kinase C, alpha	9.31868	9.09488	8.91549	8.62306	9.16577	9.00484	9.0461	8.92284
Prkcb	18751	A130082F03Rik|PKC-Beta|Pkcb|Prkcb1|Prkcb2	protein kinase C, beta	1.9298	2.85388	1.93592	2.69706	2.52914	2.83205	2.34566	2.10906
Prkcg	18752	PKCgamma|Pkcc|Prkcc	protein kinase C, gamma	5.9298	5.82071	5.19896	4.8987	5.61661	5.54826	5.51558	4.96704
Pla2g2a	18780	EF|Mom1|Pla2|sPLA2|sPla2-IIA	phospholipase A2, group IIA (platelets, synovial fluid)	3.0673	2.71637	2.78392	2.37513	3.85107	3.48413	3.34566	2.43099
Pla2g4a	18783	Pla2g4|cPLA2|cPLA2-alpha|cPLA2alpha	phospholipase A2, group IVA (cytosolic, calcium-dependent)	9.71639	8.86815	9.41489	9.17603	9.44502	9.54826	9.2283	9.4906
Pla2g5	18784	PLA2|sPLA2	phospholipase A2, group V	2.9298	5.22733	5.86192	5.23312	2.52914	2.0247	2.93062	3.10906
Plat	18791	AU020998|AW212668|D8Ertd2e|tPA	plasminogen activator, tissue	6.37605	6.82907	7.24335	5.98984	6.67889	7.09079	5.90024	6.92924
Plau	18792	u-PA|uPA	plasminogen activator, urokinase	5.96542	6.95669	7.11384	6.71498	7.37463	6.99048	6.97501	7.41284
Plcb1	18795	3110043I21Rik|AI132408|Plcb|mKIAA0581	phospholipase C, beta 1	6.96542	6.55432	7.36888	6.28202	2.85107	3.60966	2.93062	3.43099
Plcb4	18798	A930039J07Rik|AI854601|C230058B11Rik	phospholipase C, beta 4	7.31523	7.51857	7.27933	7.19531	7.6687	7.48413	7.2283	7.70152
Pld1	18805	AA536939|C85393|Pld1a|Pld1b	phospholipase D1	6.9298	6.39444	6.78392	6.64192	6.75796	7.90121	7.01808	7.43099
Pml	18854	1200009E24Rik|AI661194|Trim19	promyelocytic leukemia	8.69002	8.50819	8.76374	8.51979	7.86899	9.1668	8.51558	8.51845
Polb	18970	A430088C08Rik	polymerase (DNA directed), beta	8.11962	7.61361	8.0106	7.83457	7.84203	8.4084	7.71198	8.19652
Pold1	18971	125kDa	polymerase (DNA directed), delta 1, catalytic subunit	7.82704	7.61845	7.56819	7.53501	7.87787	7.34662	8.15301	7.56027
Pole2	18974	-	polymerase (DNA directed), epsilon 2 (p59 subunit)	9.41683	9.53144	9.64742	9.66054	9.32356	9.10684	9.19115	9.28149
Pparg	19016	Nr1c3|PPAR-gamma|PPAR-gamma2|PPARgamma|PPARgamma2	peroxisome proliferator activated receptor gamma	-0.392131	-0.605555	-0.386006	0.375134	0.529144	0.0246963	0.345656	1.69402
Ppargc1a	19017	A830037N07Rik|ENSMUSG00000079510|Gm11133|PGC-1|PGC-1v|Pgc-1alpha|Pgc1|Pgco1|Ppargc1	peroxisome proliferative activated receptor, gamma, coactivator 1 alpha	6.51476	7.31331	7.06521	6.69706	9.37463	10.3182	7.86136	10.3319
Ppp2cb	19053	AI115466|D8Ertd766e|PP2Ac	protein phosphatase 2 (formerly 2A), catalytic subunit, beta isoform	10.1422	9.91605	9.86192	9.94119	9.99062	9.89506	9.70541	9.90348
Ppp3ca	19055	2900074D19Rik|CN|Caln|Calna|CnA	protein phosphatase 3, catalytic subunit, alpha isoform	10.9845	10.5549	10.8684	10.4003	11.1882	11.6713	10.6597	11.5003
Ppp3cb	19056	1110063J16Rik|Calnb|CnAbeta|Cnab	protein phosphatase 3, catalytic subunit, beta isoform	9.92754	9.91801	10.0434	9.95067	9.98242	10.0962	9.77611	10.1397
Ppp3cc	19057	Calnc|PP2BA gamma	protein phosphatase 3, catalytic subunit, gamma isoform	7.98291	7.76513	7.87138	7.66975	7.49493	8.20957	7.39005	7.90996
Ppp3r1	19058	CaNB1|Cnb1|MCIP1	protein phosphatase 3, regulatory subunit B, alpha isoform (calcineurin B, type I)	11.3109	11.4859	11.5073	11.4586	11.3064	11.3415	11.0972	11.1616
Ppp3r2	19059	CaNB2|CnB2	protein phosphatase 3, regulatory subunit B, alpha isoform (calcineurin B, type II)	2.19283	2.39444	1.61399	0.375134	2.52914	1.60966	2.66758	3.10906
Prkar1b	19085	AI385716|RIbeta	protein kinase, cAMP dependent regulatory, type I beta	2.77779	2.2018	1.93592	1.9601	3.11411	2.60966	1.34566	1.10906
Prkar2a	19087	1110061A24Rik|AI317181|AI836829|RII(alpha)	protein kinase, cAMP dependent regulatory, type II alpha	10.7072	10.4912	10.3308	10.5211	10.5036	9.87019	10.7625	10.2319
Prkar2b	19088	AI451071|AW061005|PKARIIbeta|Pkarb2|RII(beta)	protein kinase, cAMP dependent regulatory, type II beta	10.4494	11.1245	10.9092	11.2308	10.7325	10.5541	10.7326	10.5067
Prkdc	19090	AI326420|AU019811|DNA-PKcs|DNAPDcs|DNAPK|DNPK1|DOXNPH|HYRC1|XRCC7|dxnph|p460|scid|slip	protein kinase, DNA activated, catalytic polypeptide	7.37605	6.30134	6.35546	5.9601	6.14385	6.81911	6.20364	6.67892
Mapk8ip1	19099	IB1|JIP-1|Jip1|Prkm8ip|Skip|mjip-2a	mitogen-activated protein kinase 8 interacting protein 1	8.0215	7.66591	7.93141	7.47317	7.87787	8.74237	7.91551	8.50994
Prkx	19108	PKX1|Pkare	protein kinase, X-linked	8.26608	8.54926	8.7612	8.65126	8.82376	9.23902	8.52058	9.00084
Prl	19109	AV290867|Prl1a1	prolactin	2.19283	2.56437	2.78392	2.69706	2.52914	2.34662	3.51558	2.10906
Prlr	19116	AI987712|Pr-1|Pr-3|Prlr-rs1	prolactin receptor	2.60787	2.97941	1.61399	0.375134	2.85107	2.83205	2.66758	2.69402
Prom1	19126	4932416E19Rik|AC133|CD133|Prom|Prom-1|Proml1	prominin 1	1.19283	1.71637	1.61399	2.37513	0.529144	0.0246963	1.93062	2.69402
Ptch1	19206	A230106A15Rik|Ptc|Ptc1|Ptch|mes	patched homolog 1	8.48439	7.156	6.65839	7.15649	6.57354	6.95543	7.54533	6.91642
Ptcra	19208	gp33|pT-alpha|pT-alpha-TCR|pT[a]|pTa|pTalpha	pre T cell antigen receptor alpha	1.9298	1.97941	3.07343	2.69706	3.11411	2.60966	2.66758	1.69402
Pten	19211	2310035O07Rik|A130070J02Rik|AI463227|B430203M17Rik|MMAC1|TEP1	phosphatase and tensin homolog	11.3464	11.266	11.1058	11.1961	11.3817	11.4872	11.3694	11.5211
Ptpn11	19247	2700084A17Rik|AW536184|PTP1D|PTP2C|SAP-2|SH-PTP2|SH-PTP3|SHP-2|Shp2|Syp	protein tyrosine phosphatase, non-receptor type 11	9.9566	10.1095	10.0308	9.8928	10.1694	10.1319	9.97136	9.94984
Ptpn5	19259	Step	protein tyrosine phosphatase, non-receptor type 5	2.9298	3.2018	2.42135	3.37513	2.52914	2.83205	3.80509	3.27899
Ptprr	19279	Gmcp1|PTP-SL|PTPBR7|RPTPRR|mPTP213	protein tyrosine phosphatase, receptor type, R	2.9298	2.2018	3.19896	0.375134	2.11411	2.83205	2.93062	2.43099
Rac1	19353	AL023026|D5Ertd559e	RAS-related C3 botulinum substrate 1	11.7747	11.8875	11.8271	11.7776	11.7675	11.5874	11.7321	11.5858
Rac2	19354	AI323801|AI452260	RAS-related C3 botulinum substrate 2	3.69533	3.39444	3.31443	2.69706	3.69907	3.60966	4.25255	2.91642
Rad21	19357	SCC1|mKIAA0078	RAD21 homolog (S. pombe)	12.6635	12.7839	12.6205	12.6631	12.6719	12.5824	12.4305	12.5623
Rad50	19360	Mrell|Rad50l	RAD50 homolog (S. cerevisiae)	8.13143	8.02015	7.85717	7.81808	7.55151	7.65405	7.86136	7.84377
Rad51	19361	AV304093|Rad51a|Reca	RAD51 homolog	9.45179	9.83116	9.59127	9.76315	9.81916	9.13322	9.77611	9.53323
Rad52	19365	Rad52yh	RAD52 homolog (S. cerevisiae)	6.0673	5.752	6.21391	5.69706	5.52914	6.36455	6.12702	6.0398
Rasgrp2	19395	CDC25L|Caldaggef1	RAS, guanyl releasing protein 2	2.60787	2.71637	1.19896	1.9601	2.52914	0.0246963	3.34566	1.69402
Rasal1	19415	MRASAL	RAS protein activator like 1 (GAP1 like)	1.60787	2.39444	2.19896	0.375134	1.52914	2.34662	2.66758	2.43099
Rasgrf1	19417	AI844718|CDC25|CDC25Mm|Gnrp|Grf1|Grfbeta|P190-A|Ras-GRF1|p190|p190RhoGEF	RAS protein-specific guanine nucleotide-releasing factor 1	2.41522	1.97941	2.19896	3.18249	2.52914	1.0247	4.0461	2.69402
Rasgrf2	19418	6330417G04Rik|AW048350|Grf2|Ras-GRF2	RAS protein-specific guanine nucleotide-releasing factor 2	1.9298	0.979407	1.93592	0.375134	1.52914	1.0247	3.34566	2.10906
Rasgrp1	19419	Rasgrp	RAS guanyl releasing protein 1	2.19283	0.394445	-0.386006	0.375134	2.11411	0.0246963	2.93062	2.10906
Rb1	19645	Rb|Rb-1|pRb	retinoblastoma 1	9.25173	9.23993	9.31963	8.97876	9.71402	10.2305	9.02865	10.0977
Rel	19696	c-Rel	reticuloendotheliosis oncogene	7.43442	7.51857	7.16089	7.15649	7.0683	7.11216	7.36802	7.228
Rela	19697	p65	v-rel reticuloendotheliosis viral oncogene homolog A (avian)	8.72421	8.83946	8.97594	8.78452	9.03694	9.03032	8.88093	9.03684
Reln	19699	reeler|rl	reelin	4.25173	3.85388	3.93592	2.9601	3.85107	4.48413	4.59358	4.19652
Ret	19713	PTC|RET51|RET9|c-Ret	ret proto-oncogene	3.9298	3.48191	3.78392	1.9601	3.98858	3.93159	3.80509	4.69402
Polr2j	20022	14.5kDa|Polr2i|Rpb11a|Rpo2-4	polymerase (RNA) II (DNA directed) polypeptide J	9.95216	10.1061	10.1434	10.3366	9.99675	9.84966	10.2268	9.92605
Rxrg	20183	Nr2b3	retinoid X receptor gamma	1.60787	-0.605555	1.19896	0.375134	2.11411	1.60966	2.34566	2.43099
Ncor1	20185	5730405M06Rik|A230020K14Rik|N-CoR|RIP13|Rxrip13|mKIAA1047	nuclear receptor co-repressor 1	9.25712	9.12407	9.02974	8.96385	8.93854	9.06636	8.8455	9.26388
Cxcl2	20310	CINC-2a|GROb|Gro2|MIP-2|MIP-2a|Mgsa-b|Mip2|Scyb|Scyb2	chemokine (C-X-C motif) ligand 2	3.19283	2.2018	1.19896	1.9601	2.85107	3.0247	3.93062	2.91642
Cxcl5	20311	AMCF-II|ENA-78|GCP-2|LIX|Scyb5|Scyb6	chemokine (C-X-C motif) ligand 5	9.2463	9.01833	8.55063	8.53501	7.41179	6.41701	7.44369	6.10906
Sfrp2	20319	AI851596|Sdf5	secreted frizzled-related protein 2	1.19283	0.979407	1.19896	0.375134	0.529144	1.60966	1.93062	2.91642
Sfrp1	20377	2210415K03Rik|AW011917|AW107218|AW742929|sFRP-1	secreted frizzled-related protein 1	6.92075	5.69823	6.10585	6.18249	6.08373	6.39974	5.98951	6.56849
Sfrp4	20379	-	secreted frizzled-related protein 4	2.9298	2.97941	2.61399	2.9601	2.52914	2.60966	3.15301	3.10906
Srsf2	20382	D11Wsu175e|MRF-1|Pr264|SC35|Sfrs10|Sfrs2	serine/arginine-rich splicing factor 2	12.8773	13.1283	12.9179	12.9974	13.1755	12.7985	12.9297	12.8056
Shc1	20416	Shc|ShcA|p66|p66shc	src homology 2 domain-containing transforming protein C1	9.30657	9.33989	9.78767	9.53248	10.0722	10.7355	9.68551	10.4445
Shc3	20418	N-Shc|Rai|ShcC	src homology 2 domain-containing transforming protein C3	2.19283	2.2018	2.61399	1.37513	0.529144	2.0247	1.93062	2.10906
Sin3a	20466	AW553200|Sin3|mKIAA4126|mSin3A	transcriptional regulator, SIN3A (yeast)	8.64953	8.89628	8.8524	8.87896	8.51783	8.80277	8.71634	8.6713
Six1	20471	BB138287	sine oculis-related homeobox 1	9.77152	8.88229	8.89244	8.66515	8.54595	9.34662	8.57928	8.97015
Smarca4	20586	Brg1|HP1-BP72|SNF2beta|SW1/SNF|b2b508.1Clo|b2b692Clo	SWI/SNF related, matrix associated, actin dependent regulator of chromatin, subfamily a, member 4	10.3485	9.94519	9.85359	9.81393	10.2485	10.163	10.2585	10.3852
Smarcb1	20587	AU020204|Baf47|Ini1|SNF5/INI1|Snf5	SWI/SNF related, matrix associated, actin dependent regulator of chromatin, subfamily b, member 1	8.98291	8.84772	9.11981	8.99719	8.74831	8.89506	8.64486	8.98251
Kdm5c	20591	D930009K15Rik|Jarid1c|Smcx|mKIAA0234	lysine (K)-specific demethylase 5C	10.1605	10.4511	10.5103	10.1744	10.1047	10.3113	10.1138	10.2215
Sos1	20662	4430401P03Rik|9630010N06|AI449023	son of sevenless homolog 1 (Drosophila)	7.63024	7.42235	7.66384	7.43042	7.49493	7.88268	7.64028	7.7744
Sos2	20663	SOS-2|mSOS-2	son of sevenless homolog 2 (Drosophila)	8.10771	7.95287	7.61399	7.94499	7.99675	8.29616	8.00387	8.08634
Sox17	20671	-	SRY (sex determining region Y)-box 17	2.60787	2.71637	0.613994	1.37513	2.11411	2.34662	2.66758	2.43099
Sox9	20682	2010306G03Rik|AV220920|mKIAA4243	SRY (sex determining region Y)-box 9	10.5511	9.71412	10.059	9.59672	11.0069	10.8981	9.61244	11.1972
Sp1	20683	1110003E12Rik|AA450830|AI845540|Sp1-1	trans-acting transcription factor 1	9.24268	9.21622	8.94042	9.15649	9.03694	8.83205	9.04262	9.07196
Spop	20747	AI315626|Pcif1|TEF2	speckle-type POZ protein	7.53861	7.55432	7.52688	7.58459	7.20157	7.00198	7.44369	7.07485
Spp1	20750	2AR|Apl-1|BNSP|BSPI|Bsp|ETA-1|Eta|OP|Opn|Opnl|Ric|Spp-1	secreted phosphoprotein 1	14.5696	15.3223	16.1451	15.1343	14.259	14.8634	13.9112	14.4055
Stag2	20843	9230105L23Rik|B230112I07Rik|SA-2|SAP2	stromal antigen 2	9.2732	9.01283	9.19142	9.16955	9.021	9.10418	8.78028	9.20972
Stat1	20846	2010005J02Rik|AA408197	signal transducer and activator of transcription 1	8.86761	8.75858	9.86311	8.6559	8.50069	11.2378	8.46978	9.90022
Stat3	20848	1110034C02Rik|AW109958|Aprf	signal transducer and activator of transcription 3	9.34596	9.31926	9.5521	9.32058	9.59254	10.0813	9.28229	9.9051
Stat4	20849	-	signal transducer and activator of transcription 4	1.60787	0.979407	1.19896	1.9601	3.11411	2.0247	2.34566	0.109062
Stk11	20869	AA408040|Lkb1|Par-4|R75140	serine/threonine kinase 11	10.056	10.188	10.0693	10.135	10.2278	9.99336	10.1562	10.0748
Syk	20963	Sykb	spleen tyrosine kinase	4.36276	3.09488	1.61399	2.9601	3.11411	2.83205	3.15301	2.43099
Skp1a	21402	15kDa|2610043E24Rik|2610206H23Rik|EMC19|OCP-II|OCP2|SKP1|Tceb1l|p19A|p19Skp1	S-phase kinase-associated protein 1A	11.043	11.2586	11.3062	11.1945	11.1775	11.2844	11.1055	11.0294
Hnf1a	21405	AI323641|HNF1|HNF1-alpha|HNF1[a]|Hnf-1|Hnf1alpha|LFB1|Tcf-1|Tcf1	HNF1 homeobox A	1.19283	0.979407	1.93592	2.37513	3.11411	0.0246963	2.93062	1.10906
Tcf7l1	21415	Tcf-3|Tcf3|bHLHb21	transcription factor 7 like 1 (T cell specific, HMG box)	6.64129	5.87018	5.59127	6.07557	6.81455	7.03592	6.63106	6.56849
Tcf3	21423	A1|AA408400|ALF2|AW209082|E12|E12/E47|E2A|E47|ME2|Pan1|Pan2|TCF-3|Tcfe2a|VDIR|bHLHb21	transcription factor 3	3.30831	3.64237	4.36888	4.4626	4.69907	3.83205	4.15301	4.19652
Tfdp1	21781	Dp1|Drtf1	transcription factor Dp 1	12.2279	12.1676	12.0151	12.1728	11.9788	11.6604	11.9093	11.7015
Tgfb1	21803	TGF-beta1|TGFbeta1|Tgfb|Tgfb-1	transforming growth factor, beta 1	7.38266	8.76948	9.37055	8.92588	7.74831	8.1896	7.2283	7.62476
Tgfb2	21808	BB105277|Tgf-beta2|Tgfb-2	transforming growth factor, beta 2	4.30831	3.48191	4.07343	3.83457	5.11411	6.36455	5.47494	6.10906
Tgfb3	21809	TGF-beta-3|Tgfb-3	transforming growth factor, beta 3	8.9566	8.59412	9.17241	8.42498	8.5235	8.99624	8.51558	9.20182
Tgfbr1	21812	ALK5|AU017191|Alk-5|ESK2|TGFR-1|TbetaR-I|TbetaRI	transforming growth factor, beta receptor I	8.00019	7.9336	7.97594	7.76745	8.54037	8.44255	8.01808	8.32823
Tgfbr2	21813	1110020H15Rik|AU042018|DNIIR|RIIDN|TBR-II|TbetaR-II|TbetaRII	transforming growth factor, beta receptor II	10.1567	10.2633	10.2111	9.88293	10.3252	9.95099	10.0251	10.0457
Thbs1	21825	TSP-1|TSP1|Thbs-1|tbsp1	thrombospondin 1	11.5562	11.0265	10.8458	10.4586	11.6859	11.0827	11.3873	11.3234
Thbs4	21828	TSP4	thrombospondin 4	2.19283	2.56437	0.613994	1.9601	2.52914	2.83205	3.66758	2.69402
Tiam1	21844	AI847750|D16Ium10|D16Ium10e	T cell lymphoma invasion and metastasis 1	4.0673	5.52373	5.28642	5.50442	3.52914	3.19462	3.93062	2.91642
Tlr4	21898	Lps|Ly87|Ran/M1|Rasl2-8	toll-like receptor 4	8.17772	8.46859	8.79887	8.30587	8.56257	8.94356	7.91551	8.96393
Tlx1	21908	Hox-11|Hox11	T cell leukemia, homeobox 1	1.9298	1.71637	1.61399	0.375134	1.52914	2.34662	2.66758	1.10906
Tspan7	21912	1200014P11Rik|A15|AI323365|Cd231|Mxs1|PE31|R74651|TALLA|Tm4sf2	tetraspanin 7	6.34934	5.0383	5.49664	5.18249	8.90418	10.3342	8.55511	9.54785
Tnc	21923	AI528729|C130033P17Rik|Hxb|TN|TN-C|Ten|cytotactin|tenascin-C	tenascin C	7.74742	5.54419	5.59127	4.76745	8.29733	8.4923	8.49031	8.34268
Tnf	21926	DIF|TNF-a|TNF-alpha|TNFSF2|TNFalpha|Tnfa|Tnfsf1a	tumor necrosis factor	1.9298	2.56437	1.61399	0.375134	2.11411	2.0247	2.34566	2.69402
Tnfaip3	21929	A20|Tnfip3	tumor necrosis factor, alpha-induced protein 3	7.60787	8.0165	7.33509	7.48366	7.74831	8.58312	8.08037	8.17515
Tnfrsf10b	21933	DR5|KILLER|Ly98|MK|TRAILR2|TRICK2A|TRICK2B|TRICKB	tumor necrosis factor receptor superfamily, member 10b	8.22992	9.01466	9.0106	8.95634	8.92575	8.94058	8.79687	8.88714
Cd40	21939	AI326936|Bp50|GP39|HIGM1|IGM|IMD3|T-BAM|TRAP|Tnfrsf5|p50	CD40 antigen	1.60787	1.71637	1.93592	1.9601	0.529144	1.0247	1.34566	1.69402
Tnr	21960	J1-tenascin|TN-R|janusin|restrictin	tenascin R	3.60787	3.09488	2.19896	1.9601	2.11411	1.60966	4.25255	3.69402
Top2a	21973	Top-2	topoisomerase (DNA) II alpha	11.546	11.6942	11.531	11.5312	11.6133	11.4862	11.5324	11.5792
Tpo	22018	-	thyroid peroxidase	2.9298	3.09488	2.42135	3.18249	3.52914	1.0247	2.93062	2.91642
Hsp90b1	22027	ERp99|GRP94|TA-3|Targ2|Tra-1|Tra1|endoplasmin|gp96	heat shock protein 90, beta (Grp94), member 1	13.4639	13.2907	13.4789	13.1101	13.2051	13.5172	13.2977	13.3589
Tnfsf10	22035	A330042I21Rik|AI448571|APO-2L|Ly81|TL2|Trail	tumor necrosis factor (ligand) superfamily, member 10	2.41522	3.78676	4.74328	4.07557	4.52914	6.75262	3.93062	5.01595
Trp53	22059	Tp53|bbl|bfy|bhy|p44|p53	transformation related protein 53	9.24268	9.42373	9.24881	9.47842	9.45988	9.58503	9.62874	9.46441
Tsc2	22084	Nafld|Tcs2	tuberous sclerosis 2	7.84627	7.52373	7.39535	7.49408	7.7386	8.11745	7.64028	7.95455
Tshr	22095	AI481368|hypothroid|hyt|pet	thyroid stimulating hormone receptor	1.60787	1.71637	1.61399	0.375134	2.52914	1.0247	3.15301	2.10906
Ttk	22137	AL022661|Esk1|Mps1|PYT|esk	Ttk protein kinase	9.00875	8.88429	8.95384	8.98616	9.02899	9.09884	8.97136	9.07196
Ubb	22187	AL033289|Rps27a|Uba52|Ubb2|Ubc	ubiquitin B	14.3873	14.6216	14.8836	14.6007	14.8497	14.9341	14.3967	14.6884
Kdm6a	22289	Utx	lysine (K)-specific demethylase 6A	7.34258	7.51339	7.2287	7.69706	7.70905	7.7112	7.43312	7.74569
Uty	22290	Hydb|mKIAA4057	ubiquitously transcribed tetratricopeptide repeat gene, Y chromosome	3.41522	3.09488	2.61399	2.9601	3.3365	3.60966	3.51558	3.43099
Vegfa	22339	Vegf|Vpf	vascular endothelial growth factor A	9.0836	8.65183	9.14732	8.77601	10.9182	11.3997	8.88869	10.897
Vegfb	22340	VEGF-B|Vrf	vascular endothelial growth factor B	10.4471	10.3566	10.6848	10.4439	10.89	11.5165	10.5829	11.1582
Vegfc	22341	AW228853|VEGF-C	vascular endothelial growth factor C	9.67665	9.8651	9.68947	10.0172	8.55151	8.20957	8.78028	7.8095
Vhl	22346	Vhlh	von Hippel-Lindau tumor suppressor	6.36276	6.31331	6.18385	6.32933	6.57354	6.77958	6.17855	6.64822
Wee1	22390	Wee1A	WEE 1 homolog 1 (S. pombe)	7.86526	8.11896	8.18764	8.20168	8.7386	8.38664	7.94557	8.89696
Wnt1	22408	Int-1|Wnt-1|sw|swaying	wingless-type MMTV integration site family, member 1	-0.392131	1.39444	1.93592	0.375134	2.11411	2.34662	2.34566	1.69402
Wnt10a	22409	-	wingless-type MMTV integration site family, member 10A	7.28029	8.5391	9.17624	8.34092	8.87344	9.04984	8.65399	8.73111
Wnt10b	22410	Wnt12	wingless-type MMTV integration site family, member 10B	2.19283	0.394445	1.19896	2.37513	2.52914	1.60966	2.66758	1.10906
Wnt11	22411	-	wingless-type MMTV integration site family, member 11	2.77779	0.979407	1.19896	0.375134	1.52914	2.34662	1.34566	2.43099
Wnt2	22413	2610510E18Rik|Int1l1|Irp|Mirp|Wnt-2|Wnt2a	wingless-type MMTV integration site family, member 2	2.41522	2.2018	1.61399	2.69706	3.52914	1.0247	1.93062	2.43099
Wnt2b	22414	Wnt13	wingless-type MMTV integration site family, member 2B	2.60787	1.97941	1.19896	1.37513	1.52914	1.60966	2.34566	1.69402
Wnt3	22415	Int-4|Wnt-3	wingless-type MMTV integration site family, member 3	3.19283	1.71637	1.19896	1.37513	2.11411	2.0247	3.15301	2.69402
Wnt3a	22416	Wnt-3a|vt	wingless-type MMTV integration site family, member 3A	1.60787	1.71637	1.93592	1.37513	3.11411	2.0247	2.34566	2.43099
Wnt4	22417	Wnt-4	wingless-type MMTV integration site family, member 4	3.0673	2.56437	2.78392	3.18249	0.529144	0.0246963	2.93062	2.69402
Wnt5a	22418	8030457G12Rik|Wnt-5a	wingless-type MMTV integration site family, member 5A	3.30831	2.97941	1.61399	1.9601	3.11411	2.60966	1.93062	1.10906
Wnt5b	22419	AW545702|Wnt-5b	wingless-type MMTV integration site family, member 5B	1.9298	0.979407	1.93592	1.9601	2.52914	2.34662	2.93062	1.69402
Wnt6	22420	AA409270|Wnt-6	wingless-type MMTV integration site family, member 6	3.41522	3.64237	4.74328	3.9601	2.52914	3.19462	3.34566	3.91642
Wnt7a	22421	AI849442|Wnt-7a|px|tw	wingless-type MMTV integration site family, member 7A	3.69533	2.2018	1.93592	2.69706	0.529144	2.0247	1.93062	1.69402
Wnt7b	22422	Wnt-7b	wingless-type MMTV integration site family, member 7B	3.30831	6.05266	6.96272	6.25778	3.3365	2.34662	2.93062	3.10906
Wt1	22431	D630046I19Rik|Wt-1	Wilms tumor 1 homolog	2.41522	2.85388	2.61399	3.54506	3.69907	2.34662	3.80509	3.10906
Atrx	22589	4833408C14Rik|AI447451|ATR2|DXHXS6677E|HP1-BP38|Hp1bp2|Hp1bp38|MRXS3|RAD54L|Rad54|XH2|Xnp|ZNF-HX	alpha thalassemia/mental retardation syndrome X-linked homolog (human)	10.1216	9.99807	9.76881	9.77601	10.025	10.0148	9.86529	10.1778
Xpa	22590	AI573865|Xpac	xeroderma pigmentosum, complementation group A	6.93879	6.69823	6.50881	6.3975	7.39951	7.69003	7.2283	7.40368
Xpc	22591	-	xeroderma pigmentosum, complementation group C	3.9298	3.39444	3.70146	2.9601	3.98858	4.48413	4.34566	4.27899
Zic2	22772	HPE5|Ku	zinc finger protein of the cerebellum 2	4.81732	4.94903	5.31443	5.01899	4.85107	4.88268	5.39005	4.8095
Akt3	23797	AI851531|D930002M15Rik|Nmf350	thymoma viral proto-oncogene 3	7.78778	7.47126	7.69081	7.45195	7.63767	8.21452	7.53548	8.17515
Cdc6	23834	CDC18L	cell division cycle 6	5.9298	6.06687	5.76374	5.76745	5.3365	5.06909	6.01808	5.63262
Ets2	23872	AU022856|Ets-2	E26 avian leukemia oncogene 2, 3' domain	8.97638	9.73985	10.1385	9.78028	8.93002	9.30315	8.43312	9.10624
Gadd45g	23882	AI327420|C86281|CR6|DDIT2|OIG37	growth arrest and DNA-damage-inducible 45 gamma	9.26071	9.09141	8.49969	8.91817	9.01698	8.28208	9.13682	7.93561
Lamc3	23928	AI562206|AW240805	laminin gamma 3	-0.392131	2.85388	1.61399	2.69706	2.52914	3.19462	2.34566	2.10906
Smc1a	24061	5830426I24Rik|SMC-1A|Sb1.8|Smc1|Smc1alpha|Smc1l1|Smcb|mKIAA0178	structural maintenance of chromosomes 1A	10.2087	10.5725	10.4405	10.3624	10.0895	9.6504	10.0496	10.016
Spry1	24063	sprouty1|spry-1	sprouty homolog 1 (Drosophila)	6.94772	7.69823	8.21391	7.32933	8.70905	9.19712	7.59358	8.35224
Spry2	24064	sprouty2	sprouty homolog 2 (Drosophila)	7.79274	8.23993	7.63636	8.13002	9.33004	8.91344	7.75505	8.25881
Spry4	24066	A030006O18Rik|sprouty4	sprouty homolog 4 (Drosophila)	3.30831	3.2018	3.52088	3.18249	3.98858	3.72514	4.34566	3.27899
Sufu	24069	Su(fu)	suppressor of fused homolog (Drosophila)	8.74742	8.9336	8.57978	8.75884	8.9596	9.62089	9.1722	9.31363
Tlr2	24088	Ly105	toll-like receptor 2	6.09972	6.62326	7.19896	6.58459	7.099	8.01338	6.63106	7.71639
Wif1	24117	AW107799|WIF-1	Wnt inhibitory factor 1	3.0673	3.48191	3.42135	2.69706	3.98858	2.83205	3.80509	2.91642
Map2k1	26395	MAPKK1|MEKK1|Mek1|Prkmk1	mitogen-activated protein kinase kinase 1	10.4039	9.94134	10.1512	9.98246	10.3252	10.6059	10.4633	10.4776
Map2k2	26396	AA589381|MEK2|MK2|Prkmk2	mitogen-activated protein kinase kinase 2	10.6184	10.5824	10.6371	10.6466	10.401	10.4687	10.3471	10.45
Map2k4	26398	JNKK1|MEK4|MKK4|PRKMK4|Sek1|Serk1	mitogen-activated protein kinase kinase 4	9.10572	9.32961	9.31443	9.09281	9.53477	9.51655	9.27047	9.43549
Map2k6	26399	MEK6|MKK6|Prkmk6|SAPKK3	mitogen-activated protein kinase kinase 6	5.75762	5.00915	5.70146	5.01899	5.28403	6.04706	5.80509	6.29889
Map3k1	26401	MAPKKK1|MEKK1|Mekk	mitogen-activated protein kinase kinase kinase 1	6.9298	6.71637	6.62522	6.48366	6.7386	7.27262	6.96037	6.96704
Map3k12	26404	DLK|MUK|Zpk	mitogen-activated protein kinase kinase kinase 12	3.51476	3.39444	2.61399	3.18249	4.11411	3.83205	3.93062	2.91642
Map3k5	26408	7420452D20Rik|ASK|ASK1|MAPKKK5|Mekk5	mitogen-activated protein kinase kinase kinase 5	6.45336	6.67057	6.89012	6.8987	4.52914	4.72514	4.43312	4.50138
Map3k7	26409	B430101B05|C87327|Tak1	mitogen-activated protein kinase kinase kinase 7	9.3031	9.46188	9.42938	8.72828	9.93216	9.82074	9.71634	9.61884
Map3k8	26410	Cot|Cot/Tpl2|Est|Estf|Tpl-2|Tpl2|c-COT	mitogen-activated protein kinase kinase kinase 8	4.00019	4.52373	4.70146	4.28202	4.98858	5.27262	4.59358	5.10906
Mapk1	26413	9030612K14Rik|AA407128|AU018647|C78273|ERK|Erk2|MAPK2|PRKM2|Prkm1|p41mapk|p42mapk	mitogen-activated protein kinase 1	10.9753	10.7673	10.6727	10.7567	10.539	10.6631	10.5624	10.5777
Mapk10	26414	C230008H04Rik|JNK3|JNK3B1|JNK3B2|SAPK(beta)|Serk2|p493F12|p54bSAPK	mitogen-activated protein kinase 10	3.77779	6.14933	6.42135	6.15649	3.98858	3.60966	4.66758	4.19652
Mapk3	26417	Erk-1|Erk1|Ert2|Esrk1|Mnk1|Mtap2k|Prkm3|p44|p44erk1|p44mapk	mitogen-activated protein kinase 3	10.1557	9.8923	10.4294	10.2128	10.3746	10.9256	10.2705	10.7921
Mapk8	26419	AI849689|JNK|JNK1|Prkm8|SAPK1	mitogen-activated protein kinase 8	8.26608	8.28926	8.12969	8.28802	8.47166	8.66855	7.93811	8.42647
Mapk9	26420	AI851083|JNK2|Prkm9|p54aSAPK	mitogen-activated protein kinase 9	8.94326	8.8123	8.87609	8.85087	8.63243	8.93759	8.60775	8.94827
Creb3l1	26427	Oasis	cAMP responsive element binding protein 3-like 1	4.96542	4.82071	4.61399	4.69706	4.98858	4.0247	4.25255	5.19652
Pla2g10	26565	GX sPLA2|PLA2GX|sPLA2-X	phospholipase A2, group X	1.19283	1.39444	1.61399	0.375134	1.52914	1.0247	1.34566	0.109062
Foxl2	26927	AU045128|BPES|PINTO|Pfrk	forkhead box L2	1.9298	1.97941	3.31443	1.9601	2.52914	3.34662	3.93062	3.43099
Cul1	26965	-	cullin 1	10.1037	10.4905	10.3814	10.4372	10.8053	10.62	10.6933	10.7025
Sgk2	27219	AI098171|AW146006|Sgkl	serum/glucocorticoid regulated kinase 2	2.60787	4.52373	4.82345	4.37513	4.52914	4.54826	4.0461	3.69402
Nbn	27354	Nbs1	nibrin	8.2152	7.68907	7.86192	7.49408	8.06053	7.91951	7.91551	7.78149
Skp2	27401	4930500A04Rik|FBXL1|FWD1|p45	S-phase kinase-associated protein 2 (p45)	8.30484	8.36886	8.17241	8.39194	8.34293	8.23902	8.35688	8.19121
Mapk12	29857	AW123708|Erk6|P38gamma|Prkm12|Sapk3	mitogen-activated protein kinase 12	5.8558	6.0383	6.53286	6.32933	5.11411	5.72514	4.93062	5.46661
Pik3cg	30955	5830428L06Rik|PI3Kgamma|p110gamma	phosphoinositide-3-kinase, catalytic, gamma polypeptide	2.41522	1.71637	0.613994	1.37513	2.11411	1.60966	0.345656	1.69402
Ercc4	50505	AI606920|Xpf	excision repair cross-complementing rodent repair deficiency, complementation group 4	8.45022	8.06687	7.87138	8.04047	7.69907	7.99048	7.8455	7.83016
Tmprss2	50528	D16Ertd61e	transmembrane protease, serine 2	2.60787	2.56437	3.52088	1.9601	3.98858	3.0247	4.73797	4.19652
Fbxw7	50754	1110001A17Rik|AGO|Cdc4|Fbw7|Fbwd6|Fbx30|Fbxo30|Fbxw6|SEL-10	F-box and WD-40 domain protein 7	7.42165	7.22733	7.07343	7.15649	7.64809	7.95543	7.72936	7.81642
Chek2	50883	CHK2|Cds1|HUCDS1|Rad53	checkpoint kinase 2	6.93879	6.79532	7.18385	6.94499	6.85107	7.4923	6.45418	7.28897
Nasp	50927	5033430J04Rik|AI131596|AI317140|D4Ertd767e|Epcs32|Nasp-T	nuclear autoantigenic sperm protein (histone-binding)	10.8938	11.1241	10.8953	11.0962	11.4517	10.9832	11.3921	11.1839
Ppp2r1a	51792	6330556D22Rik|PP2A|PR65	protein phosphatase 2, regulatory subunit A, alpha	12.3703	12.1281	12.1126	12.1736	12.2051	12.3313	12.0586	12.2432
Fubp1	51886	9530027K12Rik|D3Ertd330e|FBP|Fubp|Fubp4	far upstream element (FUSE) binding protein 1	10.5065	10.4872	10.2606	10.276	10.515	10.3534	10.7174	10.732
Tslp	53603	-	thymic stromal lymphopoietin	3.51476	3.64237	3.61399	3.54506	4.69907	4.60966	4.80509	4.10906
Fut8	53618	-	fucosyltransferase 8	8.17772	8.85388	8.99986	8.80559	7.947	7.79948	7.83751	8.05158
Gria3	53623	2900064I19Rik|GluA3|GluR-C|GluR-K3|Glur-3|Glur3|Gluralpha3	glutamate receptor, ionotropic, AMPA3 (alpha 3)	2.9298	2.71637	3.07343	3.37513	4.11411	3.34662	4.25255	4.10906
Map3k14	53859	Nik|aly	mitogen-activated protein kinase kinase kinase 14	6.72681	6.74317	6.65839	6.76745	6.61661	6.66855	7.08712	6.78149
Rasa4	54153	AA793972|AW112107|BB079060|CAPRI|GAPL	RAS p21 protein activator 4	5.94772	6.05266	5.88078	6.10305	5.69907	5.72514	5.80509	5.23834
Cacng4	54377	AI413107|AW491861	calcium channel, voltage-dependent, gamma subunit 4	3.0673	2.97941	3.19896	2.69706	3.85107	4.11216	3.93062	3.8095
Cacng6	54378	2310033H20Rik|AW050150	calcium channel, voltage-dependent, gamma subunit 6	2.41522	0.979407	2.61399	1.37513	2.11411	0.0246963	3.15301	2.69402
Dll4	54485	Delta4	delta-like 4 (Drosophila)	-0.392131	-0.605555	-0.386006	1.37513	0.529144	1.0247	2.93062	0.109062
Foxo4	54601	Afxh|Mllt7|afx	forkhead box O4	6.80754	6.77815	6.8524	6.91429	6.52914	7.28208	6.7886	6.85053
Pdgfc	54635	1110064L01Rik|AI647969|PDGF-C	platelet-derived growth factor, C polypeptide	10.7046	10.7415	10.9516	10.4771	11.3565	11.5624	10.7593	11.3403
Sfn	55948	Er|Mme1|Ywhas	stratifin	3.0673	3.2018	2.61399	1.9601	2.85107	2.34662	2.34566	2.10906
Smad9	55994	MADH6|Madh8|Madh9|Smad8	SMAD family member 9	4.89327	5.6039	4.36888	5.54506	3.85107	4.0247	4.34566	4.56849
Nupr1	56312	2310032H04Rik|Com1|p8	nuclear protein transcription regulator 1	9.59371	10.1155	10.6948	10.5134	8.53477	9.63387	8.73797	9.33306
Rbx1	56438	1500002P15Rik|AA517855|ROC1	ring-box 1	9.83428	10.3193	10.2838	10.2269	9.53477	9.58503	9.4954	9.63458
Pias1	56469	2900068C24Rik|Ddxbp1|GBP	protein inhibitor of activated STAT 1	7.10772	6.78676	6.8524	6.81808	6.75796	6.76616	7.00387	6.91642
Fgf21	56636	-	fibroblast growth factor 21	3.9298	1.39444	2.19896	2.9601	2.11411	2.0247	2.93062	2.10906
Gsk3b	56637	7330414F15Rik|8430431H08Rik|C86142|GSK-3|GSK-3beta|GSK3	glycogen synthase kinase 3 beta	9.54892	9.58056	9.56236	9.49926	9.77707	9.98904	9.4278	10.0249
Clcf1	56708	BSF-3|Bsf3|CLC|NNT-1	cardiotrophin-like cytokine factor 1	6.32211	6.37172	5.78392	6.13002	6.45988	5.63941	6.17855	5.75292
Mtor	56717	2610315D21Rik|AI327068|FRAP|FRAP2|Frap1|RAFT1|RAPT1|flat	mechanistic target of rapamycin (serine/threonine kinase)	7.94772	7.67522	7.59699	8.12333	7.55151	7.92556	7.82139	8.14248
Cacna2d2	56808	Cacna2d|a2d2|du|mKIAA0558|td|torpid	calcium channel, voltage-dependent, alpha 2/delta subunit 2	3.41522	3.48191	3.19896	3.37513	4.43604	3.0247	2.93062	3.8095
Dkk2	56811	-	dickkopf homolog 2 (Xenopus laevis)	2.9298	2.56437	2.19896	2.37513	1.52914	3.19462	2.93062	2.43099
Fzd2	57265	AL033370|AW456835|Fz10|Fzd10|Mfz10|Mfz10a	frizzled homolog 2 (Drosophila)	8.29437	7.75639	7.838	7.67892	7.12906	7.60966	7.36802	7.73111
Crlf2	57914	CRLM2|Ly114|Tpte2|Tslpr	cytokine receptor-like factor 2	6.41522	6.41681	6.64742	6.30587	5.85107	6.69712	5.93062	6.58479
Zbtb32	58206	4930524C15Rik|FAXF|FAZF|PLZP|Rog|Tzfp	zinc finger and BTB domain containing 32	3.51476	3.97941	3.78392	4.18249	4.43604	3.34662	4.51558	3.8095
Cacna1h	58226	Cav3.2|MNCb-1209|alpha13.2	calcium channel, voltage-dependent, T type, alpha 1H subunit	3.0673	2.56437	3.07343	3.37513	3.85107	3.0247	2.93062	3.8095
Stk4	58231	AI447339|AU020804|Kas-2|Mst1|Ysk3	serine/threonine kinase 4	8.11169	8.2305	8.26145	8.20168	8.6738	8.99048	8.53548	8.6287
Med12	59024	230kDa|Mopa|OPA-1|Tnrc11|Trap230	mediator complex subunit 12	8.72681	9.1018	9.00416	8.88689	8.60061	8.76616	8.73367	9.10058
Fancg	60534	AU041407|Xrcc9	Fanconi anemia, complementation group G	6.42805	6.36023	6.39535	6.48366	6.38713	6.87019	6.55511	6.90348
Mapk8ip2	60597	3230402N03Rik|AI847694|AW049958|IB2|Jip2|R75148	mitogen-activated protein kinase 8 interacting protein 2	1.60787	1.97941	0.613994	0.375134	2.52914	2.34662	1.34566	2.43099
Dusp10	63953	2610306G15Rik|AI158871|MKP-5|MKP5	dual specificity phosphatase 10	9.05288	8.8249	8.60552	8.47842	9.47459	9.19962	8.92686	9.2202
Fgf23	64654	-	fibroblast growth factor 23	2.60787	0.394445	-0.386006	0.375134	0.529144	1.60966	1.34566	2.43099
Suv39h2	64707	4930507K23Rik|AA536750|D030054H19Rik|D2Ertd544e|KMT1B	suppressor of variegation 3-9 homolog 2 (Drosophila)	8.49661	8.83739	8.61117	8.72828	8.79124	8.59834	9.09385	8.73477
Tsc1	64930	-	tuberous sclerosis 1	7.26608	7.23365	7.40841	7.16955	7.7386	7.88268	7.48521	8.12029
Zak	65964	AV006891|B230120H23Rik|MLTK|MLTKalpha|MLTKbeta|Map3k20	sterile alpha motif and leucine zipper containing kinase AZK	10.7481	10.7964	10.6861	10.6171	11.1521	10.6106	10.9437	10.918
Rras2	66922	2610016H24Rik|C86394|TC21	related RAS viral (r-ras) oncogene homolog 2	10.1834	10.6746	10.3672	10.4291	9.65327	9.44676	9.93437	9.51845
Pbrm1	66923	2610016F04Rik|AI507524|BAF180|Pb1	polybromo 1	8.47823	8.45514	8.45634	8.40304	8.35569	8.68291	8.10054	8.62476
Fancl	67030	2010322C19Rik|AW554273|B230118H11Rik|Phf9|Pog|gcd	Fanconi anemia, complementation group L	9.84985	9.32666	9.46574	9.25165	9.50642	9.48208	9.2675	9.4174
Rps6ka6	67071	2610524K04Rik|RSK4|S6K-alpha-6	ribosomal protein S6 kinase polypeptide 6	8.09168	6.66123	6.50881	6.44122	8.21564	7.77958	8.22217	8.12587
Fgf22	67112	2210414E06Rik|FGF-22	fibroblast growth factor 22	2.9298	1.97941	1.93592	1.37513	4.52914	2.60966	4.15301	2.91642
Ube2t	67196	2700084L22Rik|C80607	ubiquitin-conjugating enzyme E2T (putative)	8.29787	8.69365	8.86429	8.88689	8.42396	8.63941	8.24652	8.57667
Dusp6	67603	1300019I03Rik|MKP-3|MKP3|PYST1	dual specificity phosphatase 6	7.37605	7.87018	7.76881	7.79299	8.42396	9.73894	7.35688	8.65596
Bambi	68010	2610003H06Rik	BMP and activin membrane-bound inhibitor	7.0836	6.6039	7.01487	6.56496	6.28403	6.60966	6.20364	6.58479
Rpa3	68240	14kDa|C330026P08Rik	replication protein A3	9.4455	9.53655	9.73941	9.52995	10.0933	10.2607	9.85741	10.0921
Flnc	68794	1110055E19Rik|ABP-280|ABPL|Fln2	filamin C, gamma	9.29086	7.80807	7.15315	7.30587	8.57354	8.2487	8.75928	8.62476
Alkbh3	69113	1700108H04Rik|1810020C19Rik|Abh3|mABH3	alkB, alkylation repair homolog 3 (E. coli)	8.2625	8.22417	8.06108	7.94499	8.45396	8.75262	8.37356	8.62081
Polr2d	69241	2310002G05Rik|2610028L19Rik|HSRBP4|RBP4	polymerase (RNA) II (DNA directed) polypeptide D	9.43759	9.44293	9.34701	9.51213	9.48915	9.14364	9.62178	9.20709
Rfc3	69263	2810416I22Rik|38kDa|AU022547|Recc3	replication factor C (activator 1) 3	9.32555	9.42924	9.56382	9.34955	8.96377	8.89198	8.88482	8.69402
Pold4	69745	2410012M21Rik|AI463381|AW060307|Polds|p12	polymerase (DNA-directed), delta 4	9.68468	10.1452	10.5484	10.288	9.56532	9.46971	9.69438	9.5787
Mllt3	70122	2210011H10Rik|2610012I03Rik|3830408D16Rik|Af9|D4Ertd321e	myeloid/lymphoid or mixed-lineage leukemia (trithorax homolog, Drosophila); translocated to, 3	7.69002	7.14264	7.15315	7.18249	7.71897	8.15398	7.40094	7.96081
Calml3	70405	2310068O22Rik|AI326174	calmodulin-like 3	2.41522	0.979407	0.613994	1.37513	2.52914	3.0247	2.93062	1.69402
Mutyh	70603	5730495A01Rik|Mutyha|Mutyhalpha|Mutyhb|Mutyhbeta|Mutyhc|Myh	mutY homolog (E. coli)	5.33579	5.22733	4.70146	5.01899	4.98858	5.41701	5.34566	5.39446
Phf6	70998	2700007B13Rik|4931428F02Rik|mKIAA1823	PHD finger protein 6	9.91962	9.57311	9.56819	9.52488	9.37149	9.64675	9.2283	9.59489
Col24a1	71355	5430404K19Rik	collagen, type XXIV, alpha 1	2.77779	1.97941	3.61399	2.37513	3.52914	3.34662	2.66758	2.43099
Bcor	71458	5830466J11Rik|8430401K06Rik|BcorR|D930024N20Rik|mKIAA1575	BCL6 interacting corepressor	5.16246	5.50297	5.31443	4.9601	6.11411	5.34662	5.51558	5.50138
Cic	71722	1200010B10Rik|mKIAA0306	capicua homolog (Drosophila)	8.63301	8.67522	8.60268	8.4466	8.90418	9.35113	8.80098	9.552
Map3k13	71751	C130026N12Rik|LZK	mitogen-activated protein kinase kinase kinase 13	2.41522	3.39444	3.70146	3.18249	3.98858	5.3101	4.15301	4.43099
Pdgfd	71785	1110003I09Rik	platelet-derived growth factor, D polypeptide	2.19283	2.56437	1.93592	1.37513	2.11411	1.60966	1.93062	2.43099
Mad2l2	71890	2310033C13Rik|G1-453-4|MAD2B|REV7|repro22	MAD2 mitotic arrest deficient-like 2	7.54451	7.59412	7.81856	7.54506	7.45988	7.33758	7.35688	7.38519
Amer1	72345	2810002O09Rik|AW492303|Fam123b|Wtx	APC membrane recruitment 1	7.10772	6.97941	6.7939	6.81808	6.3365	7.00198	6.2283	6.83698
Fance	72775	2810451D06Rik|AI415634|AW209126	Fanconi anemia, complementation group E	5.33579	5.27709	5.13756	5.32933	5.11411	4.97889	4.93062	4.91642
Ppp2r2b	72930	2900026H06Rik|6330404L05Rik|E130009M08Rik|PP2A-PR55B|PR55-BETA|SCA12	protein phosphatase 2, regulatory subunit B, beta	3.19283	1.97941	1.61399	1.9601	2.11411	2.34662	1.93062	1.10906
Rps6ka5	73086	3110005L17Rik|6330404E13Rik|AI854034|MSK1|MSPK1|RLPK	ribosomal protein S6 kinase, polypeptide 5	5.56207	5.64237	5.65839	5.62306	5.22958	5.45096	5.25255	4.96704
Irak3	73914	4833428C18Rik|AI563835|IRAK-M	interleukin-1 receptor-associated kinase 3	2.41522	2.56437	2.19896	1.37513	2.52914	3.34662	2.34566	2.43099
Plce1	74055	4933403A21Rik|PLCepsilon|Plce|mKIAA1516	phospholipase C, epsilon 1	4.9298	4.25243	3.93592	4.07557	4.92146	3.72514	4.34566	4.75292
Cyld	74256	2010013M14Rik|2900009M21Rik|C130039D01Rik|CDMT|CYLD1|EAC|mKIAA0849	cylindromatosis (turban tumor syndrome)	9.68335	9.46457	8.9825	9.33514	9.25024	8.97014	9.08375	9.16976
Sost	74499	5430411E23Rik	sclerostin	3.41522	3.09488	3.19896	2.69706	4.11411	3.60966	4.0461	3.8095
Ddit4	74747	5830413E08Rik|AA415483|REDD1|Rtp801|dig2	DNA-damage-inducible transcript 4	9.63854	8.9624	9.40516	9.46525	7.44801	9.4084	8.57447	8.69778
Pik3cb	74769	1110001J02Rik|AI447572|p110beta	phosphatidylinositol 3-kinase, catalytic, beta polypeptide	11.4088	10.64	10.2802	10.6147	10.3902	10.0498	10.5612	10.2461
Sirt4	75387	4930596O17Rik	sirtuin 4	6.25173	6.21462	6.27221	5.76745	5.8867	6.43409	5.98951	6.29889
Them4	75778	2700077M13Rik|4921507I02Rik	thioesterase superfamily member 4	6.87466	6.51339	6.98032	6.76745	6.52914	7.96133	6.36802	7.10906
Arid2	77044	1700124K17Rik|4432409D24Rik|zipzap/p200	AT rich interactive domain 2 (ARID, RFX-like)	1.60787	2.39444	2.78392	2.9601	3.52914	3.48413	3.15301	3.27899
Creb3l4	78284	1700012K17Rik|5330432F22Rik|AIBZIP|AV040530|AV258827|CREB4|JAL|TISP40|acre1	cAMP responsive element binding protein 3-like 4	3.69533	3.56437	3.86192	3.37513	4.43604	6.13322	4.66758	5.56849
Rps27a	78294	0610006J14Rik|Uba52|Ubb|Ubc	ribosomal protein S27A	4.81732	4.91801	4.86192	5.23312	4.61661	3.48413	5.0461	5.06326
Cblc	80794	2310076I21Rik|2310079L19Rik|Cbl3	Casitas B-lineage lymphoma c	3.30831	2.39444	3.31443	3.37513	3.85107	3.48413	4.0461	3.43099
Fgf20	80857	-	fibroblast growth factor 20	1.19283	0.979407	0.613994	1.37513	1.52914	1.0247	2.34566	1.10906
Nfkbiz	80859	AA408868|INAP|Mail	nuclear factor of kappa light polypeptide gene enhancer in B cells inhibitor, zeta	6.98291	7.50297	6.65839	7.01899	7.36203	7.31932	6.66758	6.94195
Fgf16	80903	-	fibroblast growth factor 16	0.607869	0.979407	1.61399	0.375134	2.11411	1.0247	2.34566	2.10906
Dtx3	80904	Deltex3|mg310	deltex 3 homolog (Drosophila)	7.16246	7.09488	7.24335	6.9601	7.28403	7.94951	6.85345	7.78854
Tbl1xr1	81004	8030499H02Rik|A630076E03Rik|AW539987|C21|C230089I12Rik|DC42|Ira1|TBLR1	transducin (beta)-like 1X-linked receptor 1	9.27675	9.13254	9.00201	8.96759	9.24682	9.15398	9.16264	9.52902
Sf3b1	81898	155kDa|2810001M05Rik|AA409119|Prp10|SAP155|SF3b155|TA-8|Targ4	splicing factor 3b, subunit 1	10.3247	9.94711	9.75738	9.85693	10.2485	10.1694	10.1642	10.1752
Il23a	83430	IL-23|p19	interleukin 23, alpha subunit p19	1.9298	1.71637	1.61399	0.375134	0.529144	1.0247	1.34566	1.69402
Pla1a	85031	AA986889|Ps-pla1|Pspla1	phospholipase A1 member A	2.19283	3.91801	3.61399	2.37513	3.11411	3.60966	0.345656	2.10906
Il24	93672	FISP|Mda-7|Mda7|St16	interleukin 24	4.65226	4.09488	3.52088	4.37513	4.22958	3.34662	4.51558	2.69402
Wnt16	93735	E130309I19Rik	wingless-type MMTV integration site family, member 16	2.19283	2.2018	2.42135	3.18249	3.3365	2.34662	2.66758	3.10906
Arid1a	93760	1110030E03Rik|BAF250a|Osa1|Smarcf1	AT rich interactive domain 1A (SWI-like)	8.96102	8.84153	8.35209	8.56989	8.65843	8.90428	8.74654	8.78502
Fzd10	93897	Fz-10	frizzled homolog 10 (Drosophila)	1.19283	0.979407	1.61399	2.9601	1.52914	3.34662	2.34566	2.43099
Nkd1	93960	2810434J10Rik|9030215G15Rik|Nkd	naked cuticle 1 homolog (Drosophila)	1.19283	1.39444	2.42135	1.9601	1.52914	2.34662	1.93062	1.69402
Col4a6	94216	BB116301	collagen, type IV, alpha 6	2.41522	2.39444	2.42135	1.9601	3.69907	4.0247	2.93062	2.43099
Hist2h3c2	97114	H3-614|H3.2-614|Hist2h3c2-ps|Hist2h3ca1|M32461	histone cluster 2, H3c2	9.24992	10.2885	10.0117	9.77815	9.81686	9.71295	9.6101	9.61487
Faap24	101831	AW124591|AW538696|C230052I12Rik	Fanconi anemia core complex associated protein 24	7.42165	7.95287	7.85717	7.87498	7.29733	7.09079	7.85345	7.16434
Fbxw11	103583	2310065A07Rik|AA536858|BTRC2|BTRCP2|Fbxw1b|HOS	F-box and WD-40 domain protein 11	10.5664	10.4779	10.6224	10.4692	10.5107	10.8702	10.2374	10.5999
Itga9	104099	(alpha)9|2610002H11Rik|6720458D17Rik|AI461869|D130073C02|D9Ertd428e	integrin alpha 9	1.60787	1.71637	1.19896	2.37513	0.529144	3.0247	1.34566	3.10906
Bap1	104416	2300006C11Rik|AA989761|AW553466|mKIAA0272|uch-x4	Brca1 associated protein 1	5.8558	6.33696	6.15315	6.41953	6.14385	6.27262	6.15301	6.44891
Rfc4	106344	A1|AI894123|AU040575|RFC37	replication factor C (activator 1) 4	8.75253	8.54673	8.55063	8.50956	8.44203	8.08539	8.20364	8.25881
Whsc1	107823	5830445G22Rik|9430010A17Rik|AW555663|C130020C13Rik|D030027O06Rik|D930023B08Rik|MMSET|NSD2|Whsc1l|mKIAA1090|Nsd2	Wolf-Hirschhorn syndrome candidate 1 (human)	11.0892	11.2372	11.0872	11.1873	11.1066	10.9248	11.136	11.0212
Ddb2	107986	2610043A19Rik	damage specific DNA binding protein 2	3.9298	3.71637	3.78392	3.69706	4.11411	4.88268	4.43312	3.56849
Prkaa2	108079	2310008I11Rik|A830082D05|AMPKalpha2	protein kinase, AMP-activated, alpha 2 catalytic subunit	6.79769	6.18886	5.78392	5.92972	6.38713	6.66855	6.82139	6.21759
U2af1	108121	2010107D16Rik|35kDa	U2 small nuclear ribonucleoprotein auxiliary factor (U2AF) 1	12.3445	12.1241	12.0742	12.0686	12.3353	11.8827	12.3046	11.986
Xrcc4	108138	2310057B22Rik|AW413319|AW545101	X-ray repair complementing defective repair in Chinese hamster cells 4	7.25173	7.30134	7.29347	7.03335	6.83293	7.25351	6.53548	6.95455
Card11	108723	0610008L17Rik|2410011D02Rik|BIMP3|CARMA1	caspase recruitment domain family, member 11	2.19283	1.97941	2.19896	1.37513	2.52914	2.60966	1.93062	2.10906
Irak2	108960	6330415L08Rik|AI649099|IRAK-2	interleukin-1 receptor-associated kinase 2	5.75762	4.94903	4.86192	4.8987	5.69907	6.48413	5.63106	6.25881
Braf	109880	9930012E13Rik|AA120551|AA387315|AA473386|B-raf|Braf-2|Braf2|C230098H17|C87398|D6Ertd631e	Braf transforming gene	7.58515	7.51857	7.60268	7.5943	7.92146	8.19462	7.92308	8.39446
Raf1	110157	6430402F14Rik|AA990557|BB129353|Craf1|D830050J10Rik|Raf-1|c-Raf|v-Raf	v-raf-leukemia viral oncogene 1	9.68201	9.58056	9.67604	9.3438	9.75556	9.98035	9.49794	9.79731
Cebpe	110794	C/EBPe|CRP1|Gm294	CCAAT/enhancer binding protein (C/EBP), epsilon	3.0673	2.2018	3.31443	3.18249	3.11411	1.60966	3.34566	3.27899
Smc1b	140557	SMC-1B|SMC1beta|Smc1l2	structural maintenance of chromosomes 1B	-0.392131	1.71637	-0.386006	1.37513	0.529144	2.60966	1.34566	2.91642
Rac3	170758	Rac1B	RAS-related C3 botulinum substrate 3	4.56207	4.91801	4.70146	4.4626	4.77707	4.77958	4.86922	5.23834
Hdac10	170787	AW548891|Hd10	histone deacetylase 10	6.0836	6.89429	6.50881	6.50442	5.92146	6.06909	6.10054	6.0398
Flna	192176	ABP-280|Dilp2|F730004A14Rik|Fln1|GENA 379|filamin-1	filamin, alpha	9.60787	9.10008	8.86429	8.94119	9.56532	9.59455	9.73797	9.71824
Itgb4	192897	AA407042|C230078O20|CD104	integrin beta 4	4.96542	5.06687	5.65839	4.62306	5.57354	5.88268	5.0461	5.9917
Hspa1a	193740	Hsp70-3|Hsp70.3|Hsp72|hsp68|hsp70A1	heat shock protein 1A	2.19283	2.97941	2.93592	3.18249	2.85107	3.0247	3.80509	2.91642
Dtx4	207521	AI449438|BC044798|D930042H13|RNF155	deltex 4 homolog (Drosophila)	9.1216	9.08619	9.30049	9.09965	9.64809	9.80606	9.44105	9.70897
Rnf43	207742	4732452J19Rik	ring finger protein 43	5.56207	3.97941	4.13756	2.9601	5.173	5.23415	5.25255	4.69402
Aph1b	208117	2310057K14Rik|Aph1c	anterior pharynx defective 1b homolog (C. elegans)	4.9298	4.39444	4.70146	3.54506	5.52914	5.51655	4.0461	5.63262
Creb3l3	208677	BC010786|CREB-H|D10Bur1e	cAMP responsive element binding protein 3-like 3	2.19283	0.394445	1.19896	2.9601	0.529144	2.0247	2.66758	1.10906
Hdac4	208727	4932408F19Rik|HD4	histone deacetylase 4	7.12357	6.84566	7.25785	6.71498	7.34932	7.51655	7.2283	7.4841
Ccnb3	209091	-	cyclin B3	1.60787	1.39444	2.19896	1.37513	0.529144	1.0247	2.66758	1.69402
Gtf2h3	209357	34kDa|5033417D07Rik|BTF2|BTF2 p34|C730029A10|D5Ertd679e|TFIIH	general transcription factor IIH, polypeptide 3	7.72681	7.80807	7.838	7.51469	7.76755	7.93759	7.64944	7.71639
Il23r	209590	IL-23R	interleukin 23 receptor	2.19283	1.39444	2.42135	1.9601	3.11411	2.83205	2.66758	1.69402
Il20rb	213208	AV228068|Fndc6|Gm186|Il20R2	interleukin 20 receptor beta	3.77779	4.14933	3.07343	3.18249	4.61661	4.19462	4.34566	4.01595
Tet2	214133	Ayu17-449|E130014J05Rik|mKIAA1546	tet methylcytosine dioxygenase 2	6.0673	6.32518	6.19896	6.15649	6.57354	6.99048	6.2283	6.95455
Shc2	216148	6720466E06|SCK|ShcB|Sli	SHC (Src homology 2 domain containing) transforming protein 2	5.71639	5.09488	5.54473	4.83457	3.3365	3.48413	3.15301	4.86395
Socs2	216233	8030460M17|AI527257|AW108012|CIS2|Cish2|D130043N08Rik|JAB|SOCS-2|SSI-2|hg	suppressor of cytokine signaling 2	6.03413	5.69823	6.76374	5.23312	6.57354	7.94356	6.10054	7.21759
Cdc14b	218294	2810432N10Rik|A530086E13Rik|AA472821|CDC14B3|Cdc14B1	CDC14 cell division cycle 14B	5.63024	5.69823	5.54473	4.83457	5.38713	5.23415	5.29985	5.46661
Ccno	218630	C86987|Ccnu|E130318K11|Ung2	cyclin O	3.51476	4.2018	4.31443	4.37513	4.11411	3.83205	4.59358	3.43099
Traf7	224619	RFWD1	TNF receptor-associated factor 7	10.5628	10.2663	10.1914	10.294	10.5925	10.6793	10.4171	10.6482
Rin1	225870	-	Ras and Rab interactor 1	7.57365	8.31331	7.99337	7.81808	8.94277	8.48413	8.91171	8.4841
Asxl1	228790	mKIAA0978	additional sex combs like 1	8.0632	8.27709	8.29699	8.01899	8.46578	8.76279	8.48008	8.72377
Cdc14a	229776	A830059A17Rik|CDC14A2|CDC14a1|Cdc14	CDC14 cell division cycle 14A	6.53861	6.87018	6.80382	6.92972	7.37463	8.13322	7.51558	7.36645
Il22ra1	230828	9130219A07Rik|ENSMUSG00000073746|IL-22R|Il22r	interleukin 22 receptor, alpha 1	3.19283	1.97941	2.61399	2.69706	2.85107	4.11216	4.0461	2.91642
Kmt2c	231051	E330008K23Rik|HALR|Mll3|mKIAA1506	lysine (K)-specific methyltransferase 2C	6.41522	6.27709	6.19896	6.28202	6.3365	5.63941	6.01808	6.67892
Alkbh2	231642	9530023G02|AU016977|Abh2|mABH2	alkB, alkylation repair homolog 2 (E. coli)	5.16246	4.39444	4.86192	4.62306	4.43604	5.3101	4.93062	5.10906
Creb5	231991	Crebpa|D430026C09Rik	cAMP responsive element binding protein 5	4.9298	3.97941	4.42135	4.07557	4.69907	4.66855	4.25255	3.8095
Hdac11	232232	-	histone deacetylase 11	5.16246	4.2018	3.93592	4.9601	4.3365	6.11216	4.59358	5.39446
Pla2g4c	232889	D7Ertd445e	phospholipase A2, group IVC (cytosolic, calcium-independent)	4.41522	4.8863	4.56819	5.13002	4.43604	3.83205	5.10054	4.50138
Dkk4	234130	Dkk-4	dickkopf homolog 4 (Xenopus laevis)	2.9298	3.30134	3.19896	2.69706	2.85107	4.41701	4.0461	3.43099
Whsc1l1	234135	6720429E03|A530023P05|AI528490|NSD3|WHISTLE|Nsd3	Wolf-Hirschhorn syndrome candidate 1-like 1 (human)	9.71116	9.534	9.48898	9.42498	9.59254	9.38005	9.2283	9.25627
Plcg2	234779	PLCgamma2|Plcg-2	phospholipase C, gamma 2	9.13925	8.81861	9.56236	8.79299	8.27734	9.22927	7.93062	9.00993
Zbtb16	235320	AI467657|PLZF|Zfp145|lu	zinc finger and BTB domain containing 16	2.60787	1.39444	3.07343	2.69706	3.52914	2.83205	3.51558	1.69402
Setd2	235626	4921524K10Rik|BC031601|KMT3A	SET domain containing 2	9.24268	9.46992	9.09175	9.06164	9.15485	9.23902	9.14979	9.09775
Fancb	237211	BC022692	Fanconi anemia, complementation group B	7.42805	7.10869	7.02338	7.31765	5.7386	5.54826	6.51558	5.96704
Il22ra2	237310	CRF2-10|CRF2-s1|CRF2X|Il-22bp	interleukin 22 receptor, alpha 2	1.60787	0.979407	-0.386006	2.37513	2.52914	2.0247	1.93062	2.10906
Il20ra	237313	E230031K19	interleukin 20 receptor, alpha	1.19283	1.97941	1.61399	0.375134	2.11411	1.0247	0.345656	1.69402
Pla2g3	237625	-	phospholipase A2, group III	2.19283	1.39444	2.42135	1.37513	3.52914	1.60966	3.51558	2.69402
Brip1	237911	3110009N10Rik|8030460J03Rik|Bach1|FACJ|Fancj|OF	BRCA1 interacting protein C-terminal helicase 1	7.00875	6.54419	6.25785	6.23312	6.20157	6.25351	6.70321	6.4841
Arid1b	239985	8030481M12|9330189K18Rik|AI836955|Ardi1b|B230217J03Rik|mKIAA1235	AT rich interactive domain 1B (SWI-like)	8.05908	7.59902	7.77387	7.65126	8.06053	8.23415	7.9079	8.14248
Mdc1	240087	6820401C03|AA413496|Nfbd1|mKIAA0170	mediator of DNA damage checkpoint 1	7.8558	7.76513	7.45948	7.1166	7.74831	7.39974	7.9079	7.87061
Setbp1	240427	C130092E12|Seb|mKIAA0437	SET binding protein 1	2.41522	1.39444	1.19896	2.9601	2.11411	2.83205	2.66758	1.10906
Dusp5	240672	Gm337	dual specificity phosphatase 5	7.52673	7.77815	7.9977	7.83457	9.71897	8.57159	7.8455	8.77084
Itga8	241226	AI447669	integrin alpha 8	6.94772	6.9643	7.31443	6.3975	7.75796	8.43409	6.25255	8.08061
Pak7	241656	2900083L08Rik|6430627N20|Pak5	p21 protein (Cdc42/Rac)-activated kinase 7	3.41522	2.71637	2.93592	2.37513	3.69907	3.0247	3.93062	2.91642
Gdf6	242316	BMP-13|BMP13|GDF16	growth differentiation factor 6	1.19283	2.2018	1.61399	0.375134	0.529144	1.0247	2.66758	1.10906
Atr	245000	-	ataxia telangiectasia and Rad3 related	8.81244	8.52887	8.28288	8.33514	8.55705	8.24387	8.35688	8.27397
Col6a6	245026	E330019B14|E330026B02Rik	collagen, type VI, alpha 6	2.77779	2.56437	2.78392	1.9601	3.3365	2.34662	4.34566	3.43099
Polr2h	245841	-	polymerase (RNA) II (DNA directed) polypeptide H	9.79769	9.91997	9.82345	10.0027	9.59254	9.03592	9.68551	9.11749
Ccnb1	268697	Ccnb1-rs1|Ccnb1-rs13|CycB1|Cycb-4|Cycb-5|Cycb1-rs1	cyclin B1	4.30831	4.09488	4.00631	3.54506	4.69907	4.83205	4.73797	4.10906
Pkmyt1	268930	6230424P17|AW209059|Myt1	protein kinase, membrane associated tyrosine/threonine 1	7.35606	7.1018	7.16858	6.9601	7.12906	6.93159	7.03216	7.02793
Ltbp1	268977	9430031G15Rik|9830146M04|Ltbp-1|Tgfb|b2b1000Clo	latent transforming growth factor beta binding protein 1	10.8582	10.2702	10.1619	10.0669	10.021	9.58503	10.4198	9.75832
Acvr1c	269275	ACVRLK7|ALK7|Alk-7|C230097P10	activin A receptor, type IC	2.19283	0.979407	1.93592	1.9601	2.52914	1.0247	1.93062	2.10906
Ppp2r2c	269643	6330548O06Rik|IMYPNO|IMYPNO1|PR52	protein phosphatase 2, regulatory subunit B, gamma	1.60787	2.2018	0.613994	1.37513	1.52914	2.34662	3.15301	2.91642
Idh2	269951	E430004F23|IDPm|Idh-2	isocitrate dehydrogenase 2 (NADP+), mitochondrial	10.0278	10.2273	10.6509	10.5919	9.74346	10.3789	9.51056	10.0249
Maml2	270118	5930431H10|BC032967	mastermind like 2 (Drosophila)	7.86053	6.99436	6.72252	6.66054	7.61661	7.96721	7.08712	7.70897
Pla2g4f	271844	4732472I07Rik|Gm647|Pla2zeta	phospholipase A2, group IVF	2.60787	1.97941	3.61399	1.37513	2.11411	3.72514	2.66758	2.91642
Shc4	271849	6230417E10Rik|9930029B02Rik|Gm685|RaLP	SHC (Src homology 2 domain containing) family, member 4	1.9298	2.97941	3.07343	2.37513	2.85107	3.72514	3.66758	3.27899
Hist1h3b	319150	H3-53	histone cluster 1, H3b	16.2397	16.1797	16.2185	16.5655	16.2063	16.1295	16.3852	16.1788
Hist2h3b	319154	H3-615|H3-616	histone cluster 2, H3b	17.7494	17.726	17.7479	17.9393	17.6085	17.5944	17.7493	17.5511
Cxxc4	319478	9330210J02Rik|C030003J12Rik|Idax	CXXC finger 4	1.9298	2.39444	2.19896	0.375134	1.52914	1.60966	3.15301	1.69402
Dusp4	319520	2700078F24Rik|AI844617|BB104621|E130306H24Rik|MKP2	dual specificity phosphatase 4	7.16246	8.97753	9.24517	8.76745	10.1383	9.97452	8.20364	9.77972
Lig4	319583	5830471N16Rik|tiny	ligase IV, DNA, ATP-dependent	7.67396	7.13591	7.13756	6.85087	7.14385	7.4923	6.98951	7.39446
Cacna2d4	319734	5730412N02Rik|BE686333	calcium channel, voltage-dependent, alpha 2/delta subunit 4	-0.392131	-0.605555	-0.386006	0.375134	0.529144	0.0246963	0.345656	0.109062
Smo	319757	E130215L21Rik|Smoh|bnb|smoothened	smoothened, frizzled class receptor	7.84149	7.79105	7.82345	7.76745	8.13647	8.38225	8.15944	8.37116
Ercc6	319955	4732403I04|C130058G22Rik|CSB	excision repair cross-complementing rodent repair deficiency, complementation group 6	6.44076	6.55432	6.31443	5.92972	6.52914	6.73894	5.98951	6.46661
Lefty2	320202	6030463A22Rik|Ebaf|Lefta|Leftb|lefty-2|lefty-B	left-right determination factor 2	2.9298	2.2018	2.61399	1.9601	2.52914	3.60966	2.93062	2.69402
Pik3r5	320207	AV230647|F730038I15Rik	phosphoinositide-3-kinase, regulatory subunit 5, p101	5.22258	5.78676	5.10585	5.92972	5.98858	5.48413	5.86922	5.75292
Itgb8	320910	4832412O06Rik	integrin beta 8	9.26071	8.03469	8.78642	7.50442	8.38713	9.86232	7.28817	9.32095
Npm2	328440	-	nucleophosmin/nucleoplasmin 2	2.41522	0.979407	1.61399	0.375134	2.52914	0.0246963	2.93062	2.43099
Ep300	328572	A430090G16|A730011L11|KAT3B|p300|p300 HAT	E1A binding protein p300	9.95549	10.2617	9.81367	9.80559	9.60061	9.77289	9.88287	9.89206
Il19	329244	-	interleukin 19	3.30831	2.71637	2.78392	2.9601	3.52914	3.19462	3.15301	2.10906
Tnn	329278	Tnw|tenascin-W	tenascin N	2.60787	2.39444	2.42135	2.69706	3.52914	0.0246963	3.15301	1.69402
Pla2g4e	329502	2310026J01Rik|C230096D22|Pla2epsilon	phospholipase A2, group IVE	2.60787	1.71637	2.42135	1.9601	2.85107	1.60966	2.66758	2.69402
Birc7	329581	E130019N06|KIAP|Livin|ML-IAP	baculoviral IAP repeat-containing 7 (livin)	3.30831	3.30134	3.19896	2.9601	3.85107	3.93159	3.80509	4.19652
Col27a1	373864	5730512J02Rik|AI449266|mKIAA1870	collagen, type XXVII, alpha 1	2.19283	3.64237	3.19896	2.69706	3.52914	4.0247	4.73797	3.91642
Kmt2d	381022	ALR|BC032281|BC058659|C430014K11Rik|KMT2B|Mll2|Mll4	lysine (K)-specific methyltransferase 2D	8.719	9.03288	8.23238	8.59914	8.32356	8.28679	8.7076	8.76011
Prmt8	381813	Hrmt1l3|Hrmt1l4	protein arginine N-methyltransferase 8	2.9298	3.09488	3.31443	4.07557	3.3365	2.0247	3.93062	3.43099
Hdac1	433759	HD1|Hdac1-ps|MommeD5|RPD3	histone deacetylase 1	9.78279	9.8508	9.99445	9.86096	9.83292	10.0176	9.3955	9.72928
Baiap3	545192	Bap3|Gm937	BAI1-associated protein 3	2.60787	2.71637	2.93592	1.9601	3.85107	3.60966	3.51558	3.56849
Fancf	100040608	A730016A17	Fanconi anemia, complementation group F	9.58228	9.65183	9.49204	9.60636	10.0468	9.51053	9.75717	9.46
