# Supplementary material for: Kindlin-1 regulates IL-6 secretion and modulates the immune environment in breast cancer models
Source: eLife. 2023 Mar 8;12:e85739. doi: 10.7554/eLife.85739 (PMC10023156; doi:10.7554/eLife.85739)
Supplement: Figure 5—source data 1. [file elife-85739-fig5-data1.xlsx]

## Sheet: Sheet11
Forward Phase Protein Arrayof MET-01 cells (raw values)
Block	Column	Row	ID	Name	WT 1	WT 2	WT 3	NULL 1	NULL 2	NULL 3	media control
1	4	1	5	TCA-3/CCL-1	5.74	2.98	-0.04	3.87	12.63	3.23	12.68
1	3	2	5	TCA-3/CCL-1	9.67	-1.61	2.09	12.13	4.81	3.79	8.77
1	2	3	5	TCA-3/CCL-1	6.28	9.54	8.59	14.77	13.38	15.93	10.42
1	1	4	5	TCA-3/CCL-1	3.92	24.62	-3.31	2.08	7.19	7.96	12
2	4	1	6	CCL 11 /EOTAXIN	382.11	349.01	345.06	393.19	263.27	335.95	19.3
2	3	2	6	CCL 11 /EOTAXIN	351.79	415.74	335.16	379.05	250.05	333.29	12.25
2	2	3	6	CCL 11 /EOTAXIN	356.09	379.1	350.83	363.2	241.28	354.1	15.57
2	1	4	6	CCL 11 /EOTAXIN	328.23	415.39	349.32	378.42	241.78	383.63	17.87
3	4	1	7	CCL12/MCP-5	281.98	167.99	261.39	693.56	682.94	562.08	29.91
3	3	2	7	CCL12/MCP-5	289.63	173.21	294.93	741.2	687.69	569.06	34.29
3	2	3	7	CCL12/MCP-5	272.79	164.43	286.91	701.13	703.53	560.01	25.5
3	1	4	7	CCL12/MCP-5	278.97	142.32	289.78	752.83	699.78	567.01	20.95
4	4	1	8	CCL17/TARC	28.98	10.96	39.85	35.14	47.55	33.38	7.7
4	3	2	8	CCL17/TARC	36.11	12.28	37.47	34.19	46.41	36.54	2.9
4	2	3	8	CCL17/TARC	29.3	14.92	40.43	38.5	44.24	40.87	4.91
4	1	4	8	CCL17/TARC	27.56	11.47	35.03	46.31	48.72	38.07	4.99
5	4	1	9	CCL-2/JE/MCP1	5220.99	1688.63	6521.72	7055.43	7180.58	6788.98	-2.08
5	3	2	9	CCL-2/JE/MCP1	5293.5	1422.11	6481.29	7039.43	7491.19	6774.31	0.87
5	2	3	9	CCL-2/JE/MCP1	4891.75	1216.93	6546.57	7194.74	7515.77	6881.61	0.48
5	1	4	9	CCL-2/JE/MCP1	4190.09	978.32	6156.09	7143.58	7134.34	6798.96	-0.79
6	4	1	10	CCL21/6CKINE	20.32	30.9	24.69	29.14	24.4	19.54	22.98
6	3	2	10	CCL21/6CKINE	22.9	33.77	24.1	25.1	23.81	19.75	19.97
6	2	3	10	CCL21/6CKINE	22.03	23.6	25.86	31.55	21.5	23.95	24.04
6	1	4	10	CCL21/6CKINE	17.31	28.84	24.31	24.19	23.46	22.59	25.57
7	4	1	11	CCL22/MDC	0.53	-2.07	-1.33	-0.67	-1.73	0.49	8.73
7	3	2	11	CCL22/MDC	6.57	1.8	-0.69	3.99	2.03	-4.12	0.2
7	2	3	11	CCL22/MDC	-0.67	-1.46	3.53	-0.22	2.88	-0.92	-0.35
7	1	4	11	CCL22/MDC	0.59	-1.66	3.05	3.86	-0.98	-2.03	-2.24
8	4	1	12	CTACK/CCL27	27.98	11.61	28.21	29.11	26.99	24.72	20.7
8	3	2	12	CTACK/CCL27	22.92	19.35	26.42	29.33	30.28	24.51	21.95
8	2	3	12	CTACK/CCL27	20.75	16.14	27.31	19.2	25.22	18.63	28.46
8	1	4	12	CTACK/CCL27	21.17	22.31	23.79	27.57	24.41	24.33	24.89
9	4	1	17	CCL28	1.97	6.16	0.25	3.32	-0.53	1.91	-0.55
9	3	2	17	CCL28	4.38	1.68	-3.12	1.08	0.02	0.04	-0.52
9	2	3	17	CCL28	1.16	-0.86	2.57	3.47	-0.33	1.76	8.61
9	1	4	17	CCL28	-1.85	2.17	4.07	-0.51	3.84	1.76	4.26
10	4	1	18	CCL3/MIP-1a	1108.81	559.75	1005.75	418.06	367.49	401.57	29.36
10	3	2	18	CCL3/MIP-1a	1036.25	553.38	1006.39	409.4	353.66	369.18	32.19
10	2	3	18	CCL3/MIP-1a	1022.76	525.06	983.94	386.81	360.68	399.37	23.07
10	1	4	18	CCL3/MIP-1a	995.18	548.99	892.07	421.78	374.14	393.23	34.4
11	4	1	19	CCL5/RANTES	5784.49	2673.26	10028	8528.16	9256.47	9080.08	7.05
11	3	2	19	CCL5/RANTES	5023.65	2469.11	10025	8792.32	9279.96	8898.1	1.7
11	2	3	19	CCL5/RANTES	6214.76	2248.68	10040.8	8800.58	9590.98	6708.2	-0.54
11	1	4	19	CCL5/RANTES	2255.55	1823.13	9868.7	9581.31	9382.14	9220.9	0.14
12	4	1	20	CCL-6/C10	0.83	1.49	0.15	4.31	1.9	-0.61	-0.81
12	3	2	20	CCL-6/C10	0.41	-2.02	-0.24	4.14	5.08	0.7	1.1
12	2	3	20	CCL-6/C10	-2.48	-0.72	-0.43	4.57	-1.75	0.67	-3.52
12	1	4	20	CCL-6/C10	1.21	2.71	1.57	6.22	3.79	-1.43	-0.8
13	4	1	21	CCL9/10/MIP-1g	49804.2	23907.5	56345	49724.9	42539.7	55827.7	1.24
13	3	2	21	CCL9/10/MIP-1g	51060.1	28470	55683.4	48177.5	42725.5	57357.9	2.75
13	2	3	21	CCL9/10/MIP-1g	46151.9	37879.8	55864.5	50620.6	44595.2	55859	2.96
13	1	4	21	CCL9/10/MIP-1g	43212.6	18093.5	55533.9	53430.9	45135.4	55868.7	4.56
14	4	1	22	CD30 LIGAND/TNFSF8	3.15	-2.05	2.51	1.54	-0.02	2.76	-0.08
14	3	2	22	CD30 LIGAND/TNFSF8	-1.09	-1.15	-0.46	1.19	1.42	1.41	4.37
14	2	3	22	CD30 LIGAND/TNFSF8	0.89	-2.2	-0.47	1.14	2.72	7.69	-1.62
14	1	4	22	CD30 LIGAND/TNFSF8	1.03	1.81	-0.58	3.03	7.14	-0.73	-0.01
15	4	1	25	CX3CL1/FRACTALKINE	2.3	-1.9	5.65	6.3	4.78	4.17	2.43
15	3	2	25	CX3CL1/FRACTALKINE	3.3	-1.44	2.23	-1.66	6.26	-0.57	2.15
15	2	3	25	CX3CL1/FRACTALKINE	0.61	0.48	-0.2	-1.9	3.06	-0.76	2.5
15	1	4	25	CX3CL1/FRACTALKINE	9.93	-2.61	-2.04	40.56	-3.84	10.39	0.34
16	4	1	26	CXCL1/KC	234.24	483.18	385.79	437.39	747.4	513.1	-0.71
16	3	2	26	CXCL1/KC	275.07	360.12	361.93	368.95	619.93	500.93	-4.28
16	2	3	26	CXCL1/KC	246.8	407.96	316.45	417.24	452	515.18	-1.5
16	1	4	26	CXCL1/KC	178.46	351.53	294.6	385.88	418.24	496.97	0.1
17	4	1	27	CXCL10/IP-10/CRG-2	-3.05	0.39	-2.54	1.38	8.14	3.75	-0.87
17	3	2	27	CXCL10/IP-10/CRG-2	-1.46	-1.58	-1.97	-1.65	2.24	7.76	7.96
17	2	3	27	CXCL10/IP-10/CRG-2	-3.41	0.52	-1.65	2.31	-3.91	1.09	0.7
17	1	4	27	CXCL10/IP-10/CRG-2	-0.6	0.28	1.2	1.78	4.24	-0.16	-1.12
18	4	1	28	CXCL11/I-TAC	64.94	72.38	70.41	34.41	27.95	27.58	17.83
18	3	2	28	CXCL11/I-TAC	56.29	75.52	71.54	30.6	25.33	29.73	18
18	2	3	28	CXCL11/I-TAC	56.38	70.1	71.47	35.29	28.17	32.07	17.75
18	1	4	28	CXCL11/I-TAC	56.04	67.28	67.92	35.23	27.94	28.56	11.44
19	4	1	29	CXCL12/SDF-1	447.56	607.44	502.59	57.49	46.74	45.39	27.55
19	3	2	29	CXCL12/SDF-1	443.91	541.54	629.9	48.95	46.92	42.89	40.59
19	2	3	29	CXCL12/SDF-1	425.15	695.6	600.34	53.95	61.51	36.2	33.01
19	1	4	29	CXCL12/SDF-1	273.61	619.06	544.36	57.48	61.73	53.37	25.7
20	4	1	30	CXCL13/BLC/BCA-1	23.8	29.76	31.55	502.93	376.26	522.33	-0.48
20	3	2	30	CXCL13/BLC/BCA-1	16.41	20.4	24.08	514.14	392.18	545.99	-1.79
20	2	3	30	CXCL13/BLC/BCA-1	23.46	21.63	27.25	545.36	408.19	551.42	-0.96
20	1	4	30	CXCL13/BLC/BCA-1	9.1	21.6	23.05	536.67	383.61	571.31	0.71
21	4	1	31	CXCL16	1	1.52	-0.5	2.4	5.14	1.14	-2.77
21	3	2	31	CXCL16	-1.24	6.29	-0.56	-0.26	-6.27	9.52	4.66
21	2	3	31	CXCL16	1.75	1.66	7.56	4.65	3.72	-0.2	-2.74
21	1	4	31	CXCL16	1.85	0.37	2.66	3.88	0.25	-0.82	-3.75
22	4	1	32	CXCL2/GROb/MIP-2/CINC-3	5.29	10.87	16.91	16.25	11.15	9.6	14.92
22	3	2	32	CXCL2/GROb/MIP-2/CINC-3	4.78	8.33	7.14	13.45	6.61	12.66	8.29
22	2	3	32	CXCL2/GROb/MIP-2/CINC-3	11.48	16.61	12.26	19.01	17.17	9.54	11.14
22	1	4	32	CXCL2/GROb/MIP-2/CINC-3	3.87	9.78	9.89	13.03	11.66	9.51	10.84
23	4	1	33	CXCL4/PF4	12.02	16.36	2.79	5.33	-0.03	12.34	2.15
23	3	2	33	CXCL4/PF4	9.14	6.82	13.26	1.02	-4.49	6.98	3.09
23	2	3	33	CXCL4/PF4	6.15	16.46	7.41	4.57	-5.12	2.73	1.4
23	1	4	33	CXCL4/PF4	4.44	10.73	16.1	-1.19	-1.11	10.19	0.15
24	4	1	34	CXCL7/THYMUS CYT-1	4.57	-0.63	2.05	4.64	1.39	-1.21	-2.98
24	3	2	34	CXCL7/THYMUS CYT-1	-1.52	-5.05	-3.07	1.53	0.48	3.78	-2.54
24	2	3	34	CXCL7/THYMUS CYT-1	1.7	1.47	-4.04	4.9	-1.3	2.21	-5.24
24	1	4	34	CXCL7/THYMUS CYT-1	-0.79	4.69	-1.31	-7.24	-4.77	2.63	3.17
25	4	1	39	CXCL/MIG	18.54	18.36	20.94	22.34	22.5	27.42	14.46
25	3	2	39	CXCL/MIG	17.89	23.76	24.87	24.85	29.83	27.19	14.13
25	2	3	39	CXCL/MIG	16.94	22.94	27.26	29.48	29.59	22.49	18.73
25	1	4	39	CXCL/MIG	20.65	22.57	21.33	29.25	23.87	20.25	16.71
26	4	1	43	ENDOCAN/ESM1	31.09	29.71	40.65	41.06	65.37	54.1	18.01
26	3	2	43	ENDOCAN/ESM1	23.38	25.21	38.37	42.73	54.32	52.27	21.05
26	2	3	43	ENDOCAN/ESM1	25.95	33.71	51.11	35.74	54.81	62.85	13.71
26	1	4	43	ENDOCAN/ESM1	23.21	19.46	25.56	43.41	64.33	43.88	17.7
27	4	1	44	ENDOGLIN/CD105	-2.24	3.85	-2.3	7.1	1.1	13.3	13.07
27	3	2	44	ENDOGLIN/CD105	2.34	1.1	1	-1.74	0.34	2.41	3.83
27	2	3	44	ENDOGLIN/CD105	2.33	1.5	-2.21	-5.11	-2.34	8.85	6.57
27	1	4	44	ENDOGLIN/CD105	-3.71	-3.71	5.57	4.26	1.22	4.53	5.67
28	4	1	45	FAS LGAND /TNFSF6	0.12	1.75	2.63	-0.67	0.58	2.89	-3.98
28	3	2	45	FAS LGAND /TNFSF6	-1.33	4.01	-0.06	3.22	3.85	5.99	-2.43
28	2	3	45	FAS LGAND /TNFSF6	0.92	-0.77	3.56	-3.02	6.92	2.17	-0.57
28	1	4	45	FAS LGAND /TNFSF6	-1.44	-0.84	1.23	-6.93	0.92	3.48	-6.58
29	4	1	46	FLT-3	6750.41	6364.23	6109.66	9873.78	9011.81	8117.24	17.69
29	3	2	46	FLT-3	6446.22	5966.61	6083.97	9459.58	8496.44	8098.94	14.21
29	2	3	46	FLT-3	6122.25	5798.15	5984.63	9045.97	8668.46	8001.92	10.98
29	1	4	46	FLT-3	5870.71	6020.85	5841.25	9539.71	8314.01	7672.02	11.85
30	4	1	47	G-CSF	71.94	114.56	113.12	166.68	165.08	160.61	1.54
30	3	2	47	G-CSF	75.15	103.38	104	168.81	154.17	157.58	1.6
30	2	3	47	G-CSF	66.7	101.16	109.03	166.66	166.89	153.61	-1.51
30	1	4	47	G-CSF	68.78	108.41	111.02	164.81	166.58	150.46	5.85
31	4	1	50	GM-CSF	202.92	272.93	243.19	301.77	259.23	245.9	10.7
31	3	2	50	GM-CSF	184.87	270.75	237.48	311.87	254.97	265.98	-2.92
31	2	3	50	GM-CSF	178.01	251.2	248.23	312.62	254.16	271.69	-2.85
31	1	4	50	GM-CSF	163	257.16	251.12	299.66	255.78	260.3	-1.52
32	4	1	54	IFN-g	104.52	68.27	55.24	63.34	71.85	80.34	77.44
32	3	2	54	IFN-g	55.58	70.84	69.75	71.2	71.94	66.82	75.97
32	2	3	54	IFN-g	63.49	72.08	65.94	69.34	72.49	87.05	80.8
32	1	4	54	IFN-g	66.31	66.05	68.91	73.68	68.44	76.04	72.76
33	4	1	55	IGF-1	156.16	195.77	218.47	376.04	242.9	365.17	1.55
33	3	2	55	IGF-1	163.88	180.47	224.08	387.89	255.06	396.25	-2.55
33	2	3	55	IGF-1	155.77	185.3	215.34	387.67	246.43	366.5	-4.5
33	1	4	55	IGF-1	131.5	174.6	200.43	375.09	240.02	385.32	2.36
34	4	1	56	IGF-II	1.48	1.12	5.38	4.73	1.01	7.5	0.66
34	3	2	56	IGF-II	-2.3	-0.92	5.63	2.99	4.38	1.3	1.71
34	2	3	56	IGF-II	1.75	-1.23	8.77	2	1.6	4.48	0.09
34	1	4	56	IGF-II	3.72	2.43	4.99	-3.98	3.56	3.65	-0.46
35	4	1	57	IGFBP-2	145.06	190.37	207.15	266	252.81	260.8	3.61
35	3	2	57	IGFBP-2	152.88	206.23	212.34	291.61	276.42	263.06	1.09
35	2	3	57	IGFBP-2	133.41	191.23	197.3	293.89	279.19	261.78	1.11
35	1	4	57	IGFBP-2	113.32	224.5	209.29	283.8	290.06	288.33	7.98
36	4	1	58	IGFBP-3	8.27	1.32	4.17	2.38	1.55	8.99	-3.49
36	3	2	58	IGFBP-3	6.03	3.43	4.08	7.9	3.43	3.89	-1.21
36	2	3	58	IGFBP-3	3.09	12.29	0.75	6.23	4.93	6.16	-2.49
36	1	4	58	IGFBP-3	2.34	2.82	-2.75	2.41	7.24	7.65	1.51
37	4	1	59	IGFBP5	1081.16	1249.21	1271.07	1416.35	1109.62	1199.05	39.06
37	3	2	59	IGFBP5	1085.29	1296.15	1238.86	1393.07	1127.42	1252.48	26.83
37	2	3	59	IGFBP5	1082.4	1274.33	1246.01	1395.73	1138.49	1269.37	38.07
37	1	4	59	IGFBP5	969.14	1250.4	1211.92	1365.28	1057.69	1248.18	38.2
38	4	1	60	IGFBP-6	4.14	-1.18	2.4	3.7	3.07	5.17	-4.11
38	3	2	60	IGFBP-6	3.79	-0.21	0.35	0.1	-1.47	-3.31	-0.63
38	2	3	60	IGFBP-6	1.53	-1.8	-2.74	0.96	2.44	5.15	-1.29
38	1	4	60	IGFBP-6	2.21	1.52	2.71	2.73	2.14	1.14	-2.3
39	4	1	61	IL-1a/ IL-1F1	2.85	3.61	5.5	3.58	2.82	8.58	3.53
39	3	2	61	IL-1a/ IL-1F1	5.93	4.9	0.16	13.88	6.02	2.86	1.73
39	2	3	61	IL-1a/ IL-1F1	1.66	5.7	11.86	4.59	7.56	6.35	0.12
39	1	4	61	IL-1a/ IL-1F1	2.51	1.4	1.29	-0.12	2.9	4.44	4.27
40	4	1	62	IL-1b /IL-1F2	-3.19	3.9	3.89	-8.15	2.06	4.01	-3.32
40	3	2	62	IL-1b /IL-1F2	3.51	2.64	4.19	4.86	0.31	-1.6	1.8
40	2	3	62	IL-1b /IL-1F2	0.68	4.66	-1.44	2.28	-4.95	-5.27	6.74
40	1	4	62	IL-1b /IL-1F2	0.52	0.47	-1.82	-0.21	0.2	-4.67	0.86
41	4	1	63	IL-10	0.85	3.11	1.23	-1.01	6.07	2.02	0.38
41	3	2	63	IL-10	-0.34	-1.66	3.54	-0.85	1.59	-1.14	2.24
41	2	3	63	IL-10	4.81	4.96	0.8	1.25	7.91	4.01	6
41	1	4	63	IL-10	2.86	-1.82	-1.16	9.19	3.77	3.56	-1.34
42	4	1	64	IL-11	37.52	36.06	39.67	43.73	41.93	43.49	36.67
42	3	2	64	IL-11	25.31	36.05	39.78	43.67	36.47	30.8	35.63
42	2	3	64	IL-11	26.44	29.66	33.77	36.81	40.76	40.97	36.74
42	1	4	64	IL-11	21.14	27.17	32.31	36.55	28.02	40.78	37.99
43	4	1	65	IL-12/IL-23 p40	1275.22	1255.4	1231.28	98.66	109.59	130.55	8.11
43	3	2	65	IL-12/IL-23 p40	1298.59	1284.16	1205.57	96.79	107.64	141.12	11.59
43	2	3	65	IL-12/IL-23 p40	1259.57	1356.96	1154.62	96.35	95.34	131.39	6.44
43	1	4	65	IL-12/IL-23 p40	1064.32	1201.45	1089.53	103.29	98.87	133.62	8.32
44	4	1	66	IL13	-2.08	1.11	3.2	2.84	0.97	-2.99	-1.42
44	3	2	66	IL13	3.3	-2.06	-0.46	6.11	9.49	3.82	1.19
44	2	3	66	IL13	-1.23	-1.53	-3.86	1.3	-0.91	2.09	9.41
44	1	4	66	IL13	5.45	0.76	-4.43	-4.66	0.5	-0.26	-1.86
45	4	1	67	IL-17	11.54	22.39	14.28	21.93	18.51	22.05	12.71
45	3	2	67	IL-17	9.73	16.01	19.79	21.72	19.48	12.02	15.68
45	2	3	67	IL-17	11.73	12.7	16.19	19.56	16.68	23.86	15.32
45	1	4	67	IL-17	16.55	18.74	16.19	21.17	19.36	19.57	12.69
46	4	1	68	IL-1RA /IL1-F3	49.33	45.83	45.83	153.05	147.3	157.23	14.73
46	3	2	68	IL-1RA /IL1-F3	56.42	57.85	58.92	167.35	148.47	148.98	17.97
46	2	3	68	IL-1RA /IL1-F3	46.17	55.81	47.4	159.61	144.19	148.36	11.36
46	1	4	68	IL-1RA /IL1-F3	38.43	44.47	50.03	149.96	136.75	137.94	13.25
47	4	1	69	IL-2	-1.57	2.98	-3.28	3.21	1.82	-0.63	8.33
47	3	2	69	IL-2	-5.08	2.28	-1.91	-0.17	2.13	-4.08	2.15
47	2	3	69	IL-2	-0.82	-2.36	0.43	-1.44	2.41	16.68	2.87
47	1	4	69	IL-2	1.14	-5.93	-1.57	4.06	0.61	-6.31	-3.72
48	4	1	70	IL-3	31.54	14.1	8.96	16.38	5.98	28.59	-1.65
48	3	2	70	IL-3	-0.79	9.68	11.99	24.72	9	25.58	-6.34
48	2	3	70	IL-3	-2.06	7.87	14.16	10.07	9.75	28.23	-1.07
48	1	4	70	IL-3	9.02	9.51	13.63	9.99	13.17	21.64	8.86
49	4	1	71	IL-4	3.77	-1.64	0.96	1.18	-1.55	-5.01	1.1
49	3	2	71	IL-4	0.14	-3.14	-2.07	1.22	2.98	-1.12	0.05
49	2	3	71	IL-4	-1.45	5.5	-1.41	3.95	-0.75	0.61	-2.3
49	1	4	71	IL-4	-1.74	4.34	-0.74	3.85	-0.17	-1.12	-1.13
50	4	1	72	IL-5	42.5	48.92	142.42	54.44	43.39	56.8	35.14
50	3	2	72	IL-5	41.64	45.41	57.03	55.1	45.97	52.1	41.3
50	2	3	72	IL-5	43.96	51.49	48.3	49.35	55.59	46.53	51.52
50	1	4	72	IL-5	38.22	39.93	51.28	60.16	113.83	43.76	47.55
51	4	1	73	IL-6	122.95	176.77	151.72	899.53	517.88	564.94	0.68
51	3	2	73	IL-6	125.62	158.68	158.19	926.47	521.3	546.42	4.76
51	2	3	73	IL-6	114.17	161.92	144.89	904.51	519.73	530.82	3.23
51	1	4	73	IL-6	100.41	157.31	151.57	927.51	514.47	544.51	-2.42
52	4	1	74	IL-7	0.81	7.41	-1.34	4.83	2.72	1.95	2.03
52	3	2	74	IL-7	3	0.07	7.68	2.21	5.33	10.36	5.52
52	2	3	74	IL-7	6.67	0.6	-0.77	-4.33	0.43	4.6	2.35
52	1	4	74	IL-7	1.65	-6.58	1.42	-0.13	2.81	5.6	-3.35
53	4	1	76	LIPOCALIN-2/NGAL	LIXVEG	10982	11841.6	10683.9	9506.06	10833.9	-2.38
53	3	2	76	LIPOCALIN-2/NGAL	10867.1	10940.2	11138.3	10815.4	10460.5	10842.9	1.59
53	2	3	76	LIPOCALIN-2/NGAL	10054.3	10826	11636.5	11142.1	10632.2	10954.4	3.35
53	1	4	76	LIPOCALIN-2/NGAL	9278.48	10375	11324.6	9786.55	10176.2	10902.8	1.35
54	4	1	77	LIX	944.5	1099.52	1466.05	2223.49	1936.06	2308	7.8
54	3	2	77	LIX	1023.6	1422.14	1554.49	2049.07	2226.88	2990.79	0.71
54	2	3	77	LIX	793.1	1295.26	1809.33	2492.05	2594.5	2890	-3.74
54	1	4	77	LIX	629.76	1327.26	1616.7	1919.1	2413.53	2747.02	-3.93
55	4	1	78	M-CSF	2.66	-4.8	19.92	16.84	7.15	1.12	3.33
55	3	2	78	M-CSF	2.91	0.21	20.87	16.94	8.2	-0.73	-1.83
55	2	3	78	M-CSF	1.55	-1.99	20.93	20.71	10.29	-1.56	-3.25
55	1	4	78	M-CSF	-0.94	1.27	16.01	19.41	3.75	1.77	9.47
56	4	1	79	MMP-2	360.08	428.08	384.49	169.33	173.49	142.28	19.54
56	3	2	79	MMP-2	355.58	374.33	367.77	140.61	167.51	143.33	14.28
56	2	3	79	MMP-2	325.49	388.84	359.66	136.67	168.89	139.39	17.41
56	1	4	79	MMP-2	301.16	391.96	354.59	129.08	177.55	132.56	15.84
57	4	1	80	MMP-3	8210.5	9211.72	9029.84	9001.53	8950.78	7843.61	46.6
57	3	2	80	MMP-3	8161.44	8787.35	9076.72	9392.74	8389.37	7655.6	44.67
57	2	3	80	MMP-3	7820.12	8965.4	8719.95	9122.11	8602.88	7382.88	46.14
57	1	4	80	MMP-3	7099.7	8147.72	8845.37	9137.6	8739.63	7143.74	46.56
58	4	1	81	MMP-7	27.68	31.11	39.07	143.2	127.24	144.49	-0.58
58	3	2	81	MMP-7	25.02	35.96	31.52	130.06	126.25	144.96	-0.63
58	2	3	81	MMP-7	28.83	34.07	30.73	133.79	120.6	140.69	0.72
58	1	4	81	MMP-7	25.6	28.05	29.48	140.21	129.29	137.33	0
59	4	1	84	PENTRAXIN 3 /TSG-14	2.41	16.86	-0.33	-0.96	52.71	48.07	15.32
59	3	2	84	PENTRAXIN 3 /TSG-14	2.95	24.23	1.78	1.73	54.64	60.67	13.31
59	2	3	84	PENTRAXIN 3 /TSG-14	-0.65	13.74	-2.22	-0.93	58.7	51.17	14.14
59	1	4	84	PENTRAXIN 3 /TSG-14	4.07	17.36	-2.97	5.71	52.91	46.51	11.25
60	4	1	87	PRO-MMP9	725.22	742.3	832.04	1558.14	1308.86	1212.17	2.18
60	3	2	87	PRO-MMP9	767.82	832.82	773.6	1486.52	1288.9	1152	-1.19
60	2	3	87	PRO-MMP9	643.85	825.69	846.4	1536.82	1318.91	1273.22	-3.55
60	1	4	87	PRO-MMP9	400.93	757.25	797.06	1568.16	1364.42	1139.31	4.2
61	4	1	91	TNF-a	1.02	6.76	-0.89	-2.23	0.16	-4.17	13.18	EGF
61	3	2	91	TNF-a	4.78	0.58	-0.42	4.61	1.99	3.29	8.96	EGF
61	2	3	91	TNF-a	3.21	3.23	1.33	7.49	2.69	-0.07	6.26	EGF
61	1	4	91	TNF-a	-2.85	-1.44	-0.12	1.74	2.31	-3.29	4.31	EGF
62	4	1	92	TRANCE/TNFSF11/RANK L	28.57	29.93	36.07	21.31	32.52	30.48	32.53	EGF
62	3	2	92	TRANCE/TNFSF11/RANK L	25.55	27.89	21.39	30.53	28.52	38.37	32.01
62	2	3	92	TRANCE/TNFSF11/RANK L	23.74	32.6	24.53	25.9	30.37	28.43	30.71
62	1	4	92	TRANCE/TNFSF11/RANK L	22.2	27.73	23.35	20.89	21.13	22.15	37.9
63	4	1	93	TREM-1	12.19	15.3	21.99	16.93	18.22	16.47	23.93
63	3	2	93	TREM-1	19.37	23.99	13.24	18.07	24.23	9.62	14.62
63	2	3	93	TREM-1	18.67	18.14	16.2	18.49	18.51	15.18	14.39
63	1	4	93	TREM-1	12.98	21.69	17.84	19.54	18.04	19.65	16.9
64	4	1	94	VEGF164	12937.1	15392.9	12330.2	10649.6	10114.2	10806	0.31
64	3	2	94	VEGF164	12579.7	15744	12961.7	10780.9	10352.6	10673.3	8.86
64	2	3	94	VEGF164	11981.5	15307.2	12500	11006.2	9179.71	10334.7	0.77
64	1	4	94	VEGF164	9839.86	14805.1	12656.5	11082.3	10378.4	10433.6	-0.44
