# Supplementary material for: Kindlin-1 regulates IL-6 secretion and modulates the immune environment in breast cancer models
Source: eLife. 2023 Mar 8;12:e85739. doi: 10.7554/eLife.85739 (PMC10023156; doi:10.7554/eLife.85739)
Supplement: Figure 5—source data 2. [file elife-85739-fig5-data2.xlsx]

## Sheet: MET-01-WT-and-NULL-Kindlin-1-in
NanoString PanCancer Immune panel analysis of Met-1 Kin1-WT and NULL cells in vitro (normalised expression)
Name	Gene ID	Alias	Description	null 1	null 2	null 3	null 4	wt 1	wt 2	wt 3	wt 4
Abca1	11303	ABC-1|Abc1	ATP-binding cassette, sub-family A (ABC1), member 1	8.8739	8.20931	9.22248	8.04921	9.18958	10.6789	8.86741	10.3152
Abcg1	11307	AW413978|Abc8|White	ATP-binding cassette, sub-family G (WHITE), member 1	1.7267	2.25845	2.81876	3.57528	3.45864	3.08562	3.24431	3.12666
Abl1	11350	AI325092|Abl|E430008G22Rik|c-Abl	c-abl oncogene 1, non-receptor tyrosine kinase	8.70684	8.74801	8.62611	8.63898	9.17441	9.39143	8.84209	9.25078
Ada	11486	-	adenosine deaminase	7.03958	7.32761	7.12457	7.48217	7.43846	6.96009	7.20514	7.38404
Cfd	11537	Adn|DF	complement factor D (adipsin)	3.7267	1.45109	1.64883	2.99032	3.28872	2.72305	3.43695	3.71162
Adora2a	11540	A2AAR|A2aR|AA2AR	adenosine A2a receptor	2.31166	1.03605	2.45619	2.99032	1.87368	1.91569	2.43695	1.71162
Angpt1	11600	1110046O21Rik|Ang-1|Ang1	angiopoietin 1	6.18613	8.69427	9.34927	8.27572	5.64627	6.42349	4.68488	6.46651
Angpt2	11601	Agpt2|Ang-2|Ang2	angiopoietin 2	5.21855	5.30907	5.43019	5.21271	5.33311	5.86989	4.82927	6.14902
Aicda	11628	Aid|Arp2	activation-induced cytidine deaminase	2.31166	3.15153	2.97076	2.72729	2.61064	3.08562	1.43695	3.29658
Aire	11634	-	autoimmune regulator (autoimmune polyendocrinopathy candidiasis ectodermal dystrophy)	2.31166	2.77302	1.64883	1.99032	3.28872	2.91569	2.75888	2.44858
Alcam	11658	AI853494|BEN|CD166|DM-GRASP|MuSC|SC1	activated leukocyte cell adhesion molecule	7.69824	8.33983	8.63752	8.38264	6.74815	7.56674	6.92881	7.26621
Ambp	11699	AI194774|ASPI|HI-30|Intin4|Itil|UTI	alpha 1 microglobulin/bikunin	3.04863	2.45109	2.64883	2.40536	3.45864	2.72305	4.13739	1.12666
Atg5	11793	2010107M05Rik|3110067M24Rik|AW319544|Apg5l|Atg5l|C88337|Paddy	autophagy related 5	8.74351	8.92885	8.98868	8.83162	8.73993	8.83157	8.30114	8.4798
Birc5	11799	AAC-11|Api4|TIAP|survivin40	baculoviral IAP repeat-containing 5	13.6069	13.4911	13.3759	13.5611	12.9636	12.4712	12.8757	12.6253
Apoe	11816	AI255918|Apo-E	apolipoprotein E	4.11902	3.53855	2.2338	3.57528	3.74815	3.50065	3.75888	4.12666
App	11820	Abeta|Abpp|Adap|Ag|Cvap|E030013M08Rik|betaApp	amyloid beta (A4) precursor protein	11.9251	11.8666	12.0785	11.8447	11.6039	12.3359	11.3743	11.9663
Arg1	11846	AI|AI256583|Arg-1|PGIF	arginase, liver	1.31166	1.45109	2.2338	1.40536	1.28872	2.23762	0.436953	2.93401
Arg2	11847	AII|AU022422	arginase type II	1.7267	2.45109	3.34927	2.99032	2.28872	4.43925	2.75888	3.8271
Atf1	11908	-	activating transcription factor 1	9.04863	9.60084	9.32303	9.34494	9.18656	8.57033	8.72235	9.02147
Atf2	11909	Atf-2|CRE-BP|Creb2|D130078H02Rik|D18875|Tg(Gzma-Klra1)7Wum|mXBP	activating transcription factor 2	9.31916	9.31528	9.33358	9.32422	9.75224	9.98178	9.46209	9.93883
Atm	11920	AI256621|C030026E19Rik	ataxia telangiectasia mutated	8.89662	9.41254	9.1938	9.22554	8.76445	8.83456	8.87574	8.92432
Bax	12028	-	BCL2-associated X protein	9.88783	10.4602	10.5021	10.2865	10.6992	10.6213	10.3853	10.4809
Bcl10	12042	AI132454|BCL-10|C81403|CARMEN|CIPER|CLAP|ME10|cE10	B cell leukemia/lymphoma 10	9.82605	10.2406	10.3768	10.1949	10.8877	10.751	10.3632	10.6095
Bcl2	12043	AW986256|Bcl-2|C430015F12Rik|D630044D05Rik|D830018M01Rik	B cell leukemia/lymphoma 2	7.06655	6.87736	7.13265	6.92892	7.0569	7.29073	7.06631	7.21412
Bcl2l1	12048	Bcl(X)L|Bcl-XL|Bcl2l|BclX|bcl-x|bcl2-L-1	BCL2-like 1	10.4193	10.6103	10.5269	10.4194	11.7584	11.8147	11.0952	11.5639
Bcl6	12053	Bcl5	B cell leukemia/lymphoma 6	7.48159	7.58552	7.19573	7.37114	6.82788	7.18248	7.23137	6.68124
Bid	12122	2700049M22Rik|AI875481|AU022477	BH3 interacting domain death agonist	9.08205	9.75487	9.97076	9.58278	10.0419	10.4931	9.3196	10.0794
Prdm1	12142	Blimp-1|Blimp1|PRDI-BF1|ZNFPR1A1|b2b1765Clo	PR domain containing 1, with ZNF domain	1.31166	4.03605	4.10827	3.86479	3.28872	2.72305	2.75888	3.12666
Blk	12143	-	B lymphoid kinase	1.31166	2.45109	1.97076	2.99032	0.288717	1.91569	3.24431	1.12666
Cxcr5	12145	Blr1|CXC-R5|CXCR-5|Gpcr6|MDR15	chemokine (C-X-C motif) receptor 5	0.7267	0.451091	-0.351166	0.405358	0.288717	2.23762	2.02192	1.71162
Bmi1	12151	AW546694|Bmi-1|Pcgf4	Bmi1 polycomb ring finger oncogene	9.37056	9.25199	9.10416	8.92106	9.21353	9.32296	9.12345	9.18735
Bst1	12182	114/A10|A530073F09|BP-3|Bp3|Bsta1|CD157|Ly65	bone marrow stromal cell antigen 1	2.7267	2.91052	3.64883	3.86479	2.87368	3.61613	2.02192	2.12666
Btk	12229	AI528679|xid	Bruton agammaglobulinemia tyrosine kinase	2.7267	2.25845	2.97076	3.21271	2.28872	3.82258	3.89638	2.93401
Serping1	12258	C1INH|C1nh	serine (or cysteine) peptidase inhibitor, clade G, member 1	2.31166	2.62102	2.64883	2.99032	4.09607	3.61613	3.60688	3.12666
C1qa	12259	AI255395|C1q	complement component 1, q subcomponent, alpha polypeptide	3.04863	2.25845	1.2338	1.99032	0.288717	1.91569	0.436953	1.71162
C1qb	12260	-	complement component 1, q subcomponent, beta polypeptide	5.79279	1.03605	1.97076	2.40536	5.24291	5.84643	5.39115	5.41206
C1qbp	12261	AA407365|AA986492|D11Wsu182e|HABP1|P32|gC1qBP	complement component 1, q subcomponent binding protein	13.3533	13.5558	13.5543	13.6066	13.2498	12.9269	13.2691	12.9448
C2	12263	-	complement component 2 (within H-2S)	2.7267	3.62102	2.81876	4.21271	4.09607	3.82258	3.75888	4.37458
Ciita	12265	C2ta|EG669998|Gm9475|Mhc2ta	class II transactivator	4.31166	1.45109	2.64883	3.40536	0.288717	2.50065	2.43695	3.29658
C3	12266	AI255234|ASP|HSE-MSF|Plp	complement component 3	5.53405	5.79094	6.53148	5.21271	5.1467	7.48555	4.82927	6.53605
C3ar1	12267	AZ3B|C3AR|HNFAG09	complement component 3a receptor 1	2.89662	2.91052	2.2338	2.40536	2.61064	1.91569	3.43695	3.12666
C4b	12268	C4|Ss	complement component 4B (Chido blood group)	2.31166	3.35798	2.2338	1.99032	2.28872	2.72305	2.02192	2.71162
C5ar1	12273	C5aR|C5r1|Cd88|D7Msu1	complement component 5a receptor 1	3.18613	3.03605	2.45619	4.21271	2.61064	3.82258	3.75888	3.44858
C6	12274	AW111623	complement component 6	3.18613	2.25845	1.64883	2.99032	0.288717	2.91569	2.02192	2.93401
C9	12279	-	complement component 9	3.42714	2.62102	1.64883	2.99032	3.74815	3.08562	4.02192	3.8271
Casp1	12362	ICE|Il1bc	caspase 1	8.40266	10.4818	11.1724	10.4741	9.156	10.6118	8.90048	10.0736
Casp3	12367	A830040C14Rik|AC-3|Apopain|CASP-3|CC3|CPP-32|CPP32|Caspase-3|Lice|SCA-1|Yama|mldy	caspase 3	10.0086	10.5419	10.7986	10.5939	10.0928	10.5286	9.8861	10.2088
Casp8	12370	CASP-8|FLICE|MACH|Mch5	caspase 8	9.87136	9.72722	9.9898	9.7585	9.72334	10.2172	9.72697	10.0047
Runx1	12394	AML1|CBF-alpha-2|Cbfa2|Pebp2a2|Pebpa2b	runt related transcription factor 1	10.1748	10.7434	10.5744	10.4011	11.2187	11.2956	10.6837	10.821
Runx3	12399	AML2|Cbfa3|Pebp2a3	runt related transcription factor 3	0.7267	1.45109	1.97076	3.40536	1.87368	2.23762	1.43695	0.126656
Ccnd3	12445	9230106B05Rik|AA682053|AL024085|AW146355|C78795	cyclin D3	8.23053	7.90642	7.86315	8.00527	7.78856	7.98178	7.97611	7.90144
Ccr6	12458	CC-CKR-6|CCR-6|Cmkbr6|KY411	chemokine (C-C motif) receptor 6	2.89662	2.62102	1.97076	1.40536	2.61064	3.08562	3.89638	3.12666
Cd14	12475	-	CD14 antigen	8.58468	8.80203	9.1144	8.7804	7.36553	7.34196	7.42564	6.99702
Ctla4	12477	Cd152|Ctla-4|Ly-56	cytotoxic T-lymphocyte-associated protein 4	3.18613	3.15153	3.2338	3.72729	3.45864	3.72305	3.60688	4.29658
Cd19	12478	AW495831	CD19 antigen	2.53405	1.03605	2.64883	3.57528	1.28872	2.50065	0.436953	2.71162
Cd1d1	12479	AI747460|CD1.1|Cd1a|Cd1d|Ly-38	CD1d1 antigen	7.35606	6.09495	6.66006	6.51388	5.57412	7.20109	5.48135	6.43044
Cd1d2	12480	CD1.2|Cd1b|Ly-38	CD1d2 antigen	2.31166	2.03605	2.97076	2.40536	3.61064	3.61613	3.02192	3.44858
Cd2	12481	LFA-2|Ly-37|Ly37	CD2 antigen	3.04863	1.77302	1.97076	2.72729	1.28872	2.23762	2.43695	2.44858
Ms4a1	12482	AA960661|Cd20|Ly-44|Ms4a2	membrane-spanning 4-domains, subfamily A, member 1	3.31166	1.03605	2.45619	3.57528	2.87368	2.72305	3.60688	2.71162
Cd22	12483	A530093D23|Lyb-8|Lyb8	CD22 antigen	2.53405	1.77302	2.45619	2.72729	2.61064	2.91569	3.24431	2.93401
Cd28	12487	-	CD28 antigen	3.81416	4.03605	4.77812	4.40536	4.19561	4.86989	4.68488	4.58609
Cd33	12489	Siglec-3|gp67	CD33 antigen	2.31166	1.77302	2.45619	1.99032	2.28872	2.50065	3.75888	2.93401
Cd34	12490	AU040960	CD34 antigen	4.04863	4.53855	4.04115	4.49282	4.53664	3.61613	3.75888	3.44858
Cd36	12491	FAT|GPIV|Scarb3	CD36 antigen	2.31166	2.03605	1.64883	2.99032	3.09607	2.91569	3.02192	3.71162
Cd37	12493	Tspan26	CD37 antigen	3.18613	3.69902	4.04115	2.40536	3.87368	4.30801	4.02192	4.37458
Cd38	12494	ADPRC 1|Cd38-rs1|I-19	CD38 antigen	3.7267	5.28398	6.00639	5.04921	4.68103	6.16362	4.52442	5.85458
Entpd1	12495	2610206B08Rik|AA408691|Cd39|NTPDase-1	ectonucleoside triphosphate diphosphohydrolase 1	2.7267	1.77302	1.64883	1.99032	2.61064	2.50065	0.436953	2.44858
Cd3d	12500	T3d	CD3 antigen, delta polypeptide	3.97463	3.91052	4.45619	3.99032	5.0436	4.08562	5.29493	4.93401
Cd3e	12501	AI504783|CD3|CD3epsilon|T3e	CD3 antigen, epsilon polypeptide	2.31166	-0.548909	3.10827	2.72729	2.61064	2.72305	2.75888	3.58609
Cd3g	12502	Ctg-3|Ctg3|T3g	CD3 antigen, gamma polypeptide	3.31166	1.77302	2.64883	3.40536	3.87368	3.23762	3.60688	3.58609
Cd247	12503	4930549J05Rik|A430104F18Rik|AW552088|Cd3|Cd3-eta|Cd3-zeta|Cd3h|Cd3z|Cd3zeta|T3z|Tcrk|Tcrz	CD247 antigen	3.7267	3.53855	3.34927	4.65329	4.37618	3.91569	4.75888	4.51897
Cd4	12504	L3T4|Ly-4	CD4 antigen	2.53405	2.62102	3.10827	1.99032	2.28872	1.91569	3.60688	3.93401
Cd44	12505	AU023126|AW121933|AW146109|HERMES|Ly-24|Pgp-1	CD44 antigen	4.89662	4.30907	4.1724	4.79768	5.37618	5.47028	4.89638	5.55292
Cd48	12506	AI449234|AW610730|BCM1|BLAST|BLAST-1|BLAST1|Bcm-1|MEM-102|SLAMF2|Sgp-60	CD48 antigen	6.80352	4.80864	5.34927	5.16024	5.61064	6.02422	5.48135	5.90802
Cd5	12507	Ly-1|Ly-12|Ly-A|Lyt-1	CD5 antigen	0.7267	2.62102	1.97076	2.40536	1.87368	0.915692	3.02192	0.126656
Cd53	12508	AI323659|Ox-44|Tspan25	CD53 antigen	-0.2733	1.45109	2.81876	3.21271	3.28872	2.23762	2.43695	3.71162
Cd6	12511	-	CD6 antigen	1.7267	2.03605	2.97076	1.40536	1.28872	3.08562	3.24431	2.12666
Cd63	12512	C75951|ME491|Tspan30	CD63 antigen	14.1914	13.9311	14.255	13.9369	14.3093	14.9305	14.0676	14.4968
Cd68	12514	Lamp4|Scard1|gp110	CD68 antigen	6.71538	6.79982	7.62038	7.02007	8.1089	9.75804	7.54548	9.15732
Cd69	12515	5830438K24Rik|AI452015|AIM|VEA	CD69 antigen	2.31166	-0.548909	1.2338	0.405358	0.288717	1.91569	3.02192	2.12666
Cd7	12516	-	CD7 antigen	2.7267	2.45109	2.45619	2.99032	2.87368	2.50065	3.43695	2.71162
Cd79a	12518	Ig-alpha|Iga|Igalpha|Ly-54|Ly54|mb-1	CD79A antigen (immunoglobulin-associated alpha)	2.04863	1.45109	1.2338	2.99032	2.61064	2.91569	2.43695	2.44858
Cd80	12519	B71|Cd28l|Ly-53|Ly53|MIC17|TSA1	CD80 antigen	4.42714	5.84341	5.85829	5.79768	3.61064	3.37512	3.89638	4.29658
Cd81	12520	Tapa-1|Tapa1|Tspan28	CD81 antigen	12.7235	13.1032	13.3486	13.0461	13.2811	13.6581	12.9544	13.3618
Cd83	12522	-	CD83 antigen	2.7267	2.25845	2.64883	2.72729	3.61064	3.23762	3.75888	3.93401
Cd84	12523	A130013D22Rik|CDw84|SLAMF5	CD84 antigen	0.7267	1.77302	1.64883	0.405358	2.28872	3.50065	3.24431	2.44858
Cd86	12524	B7|B7-2|B7.2|B70|CLS1|Cd28l2|ETC-1|Ly-58|Ly58|MB7|MB7-2|TS/A-2	CD86 antigen	3.18613	2.45109	2.81876	3.21271	3.74815	3.37512	3.60688	3.58609
Cd8a	12525	BB154331|Ly-2|Ly-35|Ly-B|Lyt-2	CD8 antigen, alpha chain	2.53405	1.77302	1.97076	2.72729	3.09607	1.50065	2.43695	2.71162
Cd8b1	12526	Cd8b|Ly-3|Ly-C|Lyt-3	CD8 antigen, beta chain 1	2.53405	1.77302	2.81876	1.40536	2.28872	2.72305	2.43695	3.58609
Cd9	12527	Tspan29	CD9 antigen	12.6422	12.5585	12.9566	12.6275	12.6493	12.9173	12.4362	12.7351
Cdk1	12534	Cdc2|Cdc2a|p34<CDC2>	cyclin-dependent kinase 1	6.54688	7.26487	6.33533	6.63418	6.93257	6.42349	6.41423	6.03355
Cdh1	12550	AA960649|E-cad|Ecad|L-CAM|UVO|Um	cadherin 1	1.7267	2.25845	3.2338	3.40536	3.28872	2.72305	2.75888	3.29658
Cdh5	12562	7B4|AA408225|Cd144|VE-Cad|VECD|VEcad|Vec	cadherin 5	2.31166	2.03605	1.97076	2.99032	2.28872	2.91569	3.60688	2.93401
Cdkn1a	12575	CAP20|CDKI|CIP1|Cdkn1|P21|SDI1|Waf1|mda6|p21Cip1|p21WAF	cyclin-dependent kinase inhibitor 1A (P21)	11.1524	11.5435	11.4322	11.5217	11.2298	11.7517	11.5956	10.7813
Cebpb	12608	C/EBPbeta|CRP2|IL-6DBP|LAP|LIP|NF-IL6|NF-M|Nfil6	CCAAT/enhancer binding protein (C/EBP), beta	10.0396	10.2093	11.1052	10.4291	11.0419	11.1403	10.0369	11.4339
Cfh	12628	Mud-1|NOM|Sas-1|Sas1	complement component factor h	7.9507	3.84341	5.04115	3.72729	3.09607	4.30801	2.75888	4.71162
Cfi	12630	-	complement component factor i	3.53405	1.77302	1.2338	2.99032	3.87368	4.00315	3.75888	4.03355
Chil3	12655	AI505981|Chi3l3|ECF-L|Ym1	chitinase-like 3	2.53405	2.03605	3.2338	2.40536	3.45864	3.23762	3.24431	3.71162
Chuk	12675	AI256658|Chuk1|Fbx24|Fbxo24|IKBKA|IKK1|Ikka|NFKBIKA	conserved helix-loop-helix ubiquitous kinase	10.8463	10.572	10.558	10.4994	11.0327	11.054	10.8527	10.9412
Socs3	12702	Cis3|Cish3|EF-10|Ef10|SSI-3|Ssi3	suppressor of cytokine signaling 3	6.93615	6.58037	6.1724	6.21271	4.81228	5.34196	5.56624	4.8271
Socs1	12703	Cish1|Cish7|JAB|SOCS-1|SSI-1	suppressor of cytokine signaling 1	8.23845	8.50908	8.12457	8.18014	8.2545	7.74858	7.92077	7.21412
Clu	12759	AI893575|ApoJ|Cli|D14Ucla3|SP-40|Sgp-2|Sgp2|Sugp-2	clusterin	11.9486	11.621	11.7649	11.369	11.8054	12.5512	11.3948	12.1927
Cmah	12763	-	cytidine monophospho-N-acetylneuraminic acid hydroxylase	2.04863	2.77302	3.2338	1.40536	3.61064	2.23762	2.75888	2.44858
Cxcr2	12765	CD128|CDw128|Cmkar2|Gpcr16|IL-8Rh|IL-8rb|IL8RA|Il8rb|mIL-8RH	chemokine (C-X-C motif) receptor 2	2.89662	2.45109	2.97076	2.99032	3.45864	3.37512	3.24431	3.58609
Cxcr3	12766	Cd183|Cmkar3	chemokine (C-X-C motif) receptor 3	2.53405	2.03605	3.34927	2.72729	3.45864	2.50065	4.34384	4.21412
Cxcr4	12767	CD184|Cmkar4|LESTR|PB-CKR|PBSF/SDF-1|Sdf1r|b2b220Clo	chemokine (C-X-C motif) receptor 4	1.7267	1.77302	1.64883	2.40536	2.87368	1.91569	2.75888	3.29658
Ccr1	12768	Cmkbr1|Mip-1a-R	chemokine (C-C motif) receptor 1	2.89662	2.77302	2.2338	1.99032	3.45864	1.91569	4.24431	2.12666
Ccr9	12769	A130091K22Rik|Cmkbr10|GPR-9-6	chemokine (C-C motif) receptor 9	3.04863	2.25845	3.34927	3.21271	3.45864	3.82258	4.13739	2.93401
Ccr3	12771	CC-CKR3|CKR3|Cmkbr1l2|Cmkbr3	chemokine (C-C motif) receptor 3	1.7267	1.45109	1.64883	1.99032	2.28872	-0.0843081	0.436953	1.71162
Ccr2	12772	Cc-ckr-2|Ccr2a|Ccr2b|Ckr2|Ckr2a|Ckr2b|Cmkbr2|mJe-r	chemokine (C-C motif) receptor 2	1.7267	1.03605	1.97076	2.40536	2.87368	2.91569	2.75888	3.12666
Ccr4	12773	C-C CKR-4|CHEMR1|Cmkbr4|LESTR|Sdf1r	chemokine (C-C motif) receptor 4	3.04863	1.45109	2.2338	2.40536	3.09607	2.72305	2.02192	2.12666
Ccr5	12774	AM4-7|CD195|Cmkbr5	chemokine (C-C motif) receptor 5	-0.2733	-0.548909	-0.351166	1.99032	2.61064	-0.0843081	0.436953	0.126656
Ccr7	12775	CC-CKR-7|CCR-7|CD197|Cdw197|Cmkbr7|EBI1|Ebi1h	chemokine (C-C motif) receptor 7	3.63359	2.62102	2.45619	3.21271	3.45864	3.50065	3.43695	2.12666
Ccr8	12776	C-C|C-C CKR-8|CC-CKR-8|CCR-8|CKR-8|Cmkbr8|mCCR8	chemokine (C-C motif) receptor 8	2.89662	3.77302	4.10827	2.72729	3.09607	1.50065	3.02192	4.51897
Camp	12796	CAP18|Cnlp|Cramp|FALL39|MCLP	cathelicidin antimicrobial peptide	2.89662	2.62102	1.2338	2.40536	3.09607	0.915692	3.24431	2.71162
Col3a1	12825	AW550625|Col3a-1|MMS10-W|Ms10w|mKIAA4231	collagen, type III, alpha 1	8.05762	8.38183	8.80871	8.21914	6.53664	6.37512	5.96052	6.0093
Col4a1	12826	Bru|Col4a-1|Del(8)44H|Raw|Svc	collagen, type IV, alpha 1	8.22655	8.55962	8.46582	8.43326	7.1467	7.7549	7.26984	7.41206
Col1a1	12842	Col1a-1|Cola-1|Cola1|Mov-13|Mov13	collagen, type I, alpha 1	12.5375	11.7586	11.892	11.3969	11.5891	11.6689	11.8228	11.889
Cr2	12902	C3DR|CD21|CD35|Cr-1|Cr-2|Cr1	complement receptor 2	1.31166	2.25845	1.97076	1.40536	1.87368	2.72305	2.02192	3.44858
Creb1	12912	2310001E10Rik|3526402H21Rik|AV083133|Creb|Creb-1	cAMP responsive element binding protein 1	9.08864	8.72722	8.65165	8.80196	8.61064	9.12271	8.95265	8.92756
Crebbp	12914	AW558298|CBP|CBP/p300|KAT3A|p300/CBP	CREB binding protein	10.7847	10.4369	10.1103	10.1884	10.2371	10.3123	10.2949	10.3852
Crp	12944	AI255847	C-reactive protein, pentraxin-related	3.18613	2.77302	3.10827	2.99032	1.28872	3.23762	2.75888	4.12666
Dmbt1	12945	CRP|CRP-[a]|CRP-[b]|Crpd|DBMT1|gp300|p80	deleted in malignant brain tumors 1	2.7267	1.77302	1.2338	1.40536	1.87368	-0.0843081	1.43695	2.44858
Csf1	12977	C87615|Csfm|MCSF|op	colony stimulating factor 1 (macrophage)	12.667	13.0745	12.6146	12.7284	13.7955	13.0043	13.5478	12.8433
Csf1r	12978	AI323359|CD115|CSF-1R|Csfmr|Fim-2|Fms|M-CSF-R|M-CSFR	colony stimulating factor 1 receptor	4.42714	2.91052	2.81876	2.72729	3.74815	3.08562	3.60688	3.71162
Csf2	12981	Csfgm|GMCSF|Gm-CSf|MGI-IGM	colony stimulating factor 2 (granulocyte-macrophage)	2.7267	2.62102	2.45619	1.40536	2.28872	3.08562	2.75888	3.12666
Csf2rb	12983	AI848964|AIC2B|Bc|CDw131|Csf2rb1|Csfgmrb|Il3r|Il3rb|Il3rb1|Il5rb	colony stimulating factor 2 receptor, beta, low-affinity (granulocyte-macrophage)	0.7267	2.03605	2.45619	2.40536	2.28872	-0.0843081	2.02192	3.12666
Csf3	12985	Csfg|G-CSF|MGI-IG	colony stimulating factor 3 (granulocyte)	1.31166	2.45109	2.2338	2.40536	3.09607	3.08562	3.02192	3.44858
Csf3r	12986	Cd114|Csfgr|G-CSF-R|G-CSFR	colony stimulating factor 3 receptor (granulocyte)	2.04863	2.03605	2.45619	0.405358	2.28872	3.37512	2.43695	1.71162
Ctsg	13035	CatG|VSP	cathepsin G	-0.2733	2.03605	2.64883	3.21271	1.28872	1.50065	3.24431	1.71162
Ctsh	13036	AL022844	cathepsin H	7.02132	5.12352	5.2338	4.21271	6.12161	7.40755	5.19184	6.43044
Ctsl	13039	1190035F06Rik|CatL|Ctsl1|MEP|fs|nkt	cathepsin L	9.00049	9.09495	9.69323	9.43326	9.39463	10.1731	9.11291	9.79377
Ctss	13040	Cats	cathepsin S	2.53405	1.03605	0.648834	2.40536	2.87368	1.50065	0.436953	2.44858
Ctsw	13041	lymphopain	cathepsin W	3.7267	3.25845	4.1724	4.21271	3.28872	4.37512	4.68488	4.77051
Cx3cr1	13051	-	chemokine (C-X3-C motif) receptor 1	7.37056	8.39067	7.28546	7.5243	5.61064	7.22857	6.97611	5.95955
Cybb	13058	C88302|CGD91-phox|Cgd|Cyd|Nox2|gp91-1|gp91phox	cytochrome b-245, beta polypeptide	1.7267	2.45109	1.64883	2.99032	3.09607	2.23762	3.60688	2.44858
Cd55	13136	Daf|Daf-GPI|Daf1|GPI-DAF	CD55 molecule, decay accelerating factor for complement	1.31166	2.25845	1.64883	1.99032	1.87368	2.50065	2.02192	3.12666
Defb1	13214	AW260221|BD-1	defensin beta 1	3.42714	3.03605	1.64883	2.99032	2.61064	3.61613	3.60688	2.71162
Dpp4	13482	Cd26|Dpp-4|THAM	dipeptidylpeptidase 4	1.31166	2.03605	0.648834	1.99032	2.28872	1.91569	3.24431	1.12666
Egfr	13649	9030024J15Rik|AI552599|Erbb|Errb1|Errp|Wa5|wa-2|wa2	epidermal growth factor receptor	5.81416	6.92682	6.75736	6.72729	6.21945	6.48555	7.09516	6.46651
Egr1	13653	A530045N19Rik|ETR103|Egr-1|Krox-1|Krox-24|Krox24|NGF1-A|NGFI-A|NGFIA|TIS8|Zenk|Zfp-6|Zif268|egr	early growth response 1	7.48159	8.47068	7.5677	8.87296	10.5672	10.8815	9.00681	9.0982
Egr2	13654	Egr-2|Krox-20|Krox20|NGF1-B|Zfp-25|Zfp-6	early growth response 2	2.04863	2.03605	2.45619	3.72729	2.87368	3.82258	3.02192	3.44858
Egr3	13655	Pilot	early growth response 3	4.37056	4.53855	5.2338	3.86479	4.19561	4.00315	4.43695	5.08085
Elk1	13712	Elk-1	ELK1, member of ETS oncogene family	4.31166	4.62102	4.77812	3.21271	4.28872	4.16362	4.75888	5.17105
Adgre1	13733	DD7A5-7|EGF-TM7|Emr1|F4/80|Gpf480|Ly71|TM7LN3	adhesion G protein-coupled receptor E1	-0.2733	-0.548909	-0.351166	1.40536	0.288717	-0.0843081	0.436953	0.126656
Eng	13805	AI528660|AI662476|CD105|Endo|S-endoglin	endoglin	2.31166	-0.548909	2.45619	1.40536	1.87368	2.23762	2.75888	2.93401
Eomes	13813	C77258|TBR-2|Tbr2	eomesodermin homolog (Xenopus laevis)	2.04863	1.77302	2.64883	1.99032	2.61064	2.50065	2.02192	2.71162
Erbb2	13866	Erbb-2|HER-2|HER2|Neu|c-erbB2|c-neu|mKIAA3023	v-erb-b2 erythroblastic leukemia viral oncogene homolog 2, neuro/glioblastoma derived oncogene homolog (avian)	9.1233	8.87736	8.83866	8.86888	8.94335	8.97639	8.92077	8.93723
Ewsr1	14030	Ews|Ewsh	Ewing sarcoma breakpoint region 1	11.9181	12.0269	11.8436	11.7961	12.068	11.9498	11.739	11.8357
F2rl1	14063	Gpcr11|PAR-2|Par2	coagulation factor II (thrombin) receptor-like 1	2.53405	2.25845	1.97076	1.40536	2.28872	1.91569	3.02192	1.71162
Fadd	14082	Mort1/FADD	Fas (TNFRSF6)-associated via death domain	6.54688	7.09495	7.31417	6.63418	6.94693	6.47028	6.39115	7.05739
Fap	14089	SIMP	fibroblast activation protein	2.53405	3.03605	1.2338	2.40536	1.87368	3.50065	2.43695	3.58609
Fas	14102	AI196731|APO1|APT1|CD95|TNFR6|Tnfrsf6|lpr	Fas (TNF receptor superfamily member 6)	8.77109	8.20598	8.64601	8.03471	9.20758	9.23084	8.45376	9.5963
Fasl	14103	APT1LG1|CD178|CD95-L|CD95L|Fas-L|Faslg|Tnfsf6|gld	Fas ligand (TNF superfamily, member 6)	1.7267	1.77302	2.45619	1.99032	0.288717	2.23762	3.02192	2.93401
Fcer1a	14125	FcERI|Fce1a|Fcr-5|fcepsilonri	Fc receptor, IgE, high affinity I, alpha polypeptide	3.04863	2.03605	1.97076	1.40536	2.87368	3.23762	3.02192	3.12666
Ms4a2	14126	FcRB|Fce1b|Fcer1b|Fcrbeta|Ms4a1|fcERI	membrane-spanning 4-domains, subfamily A, member 2	3.04863	2.03605	1.97076	1.99032	3.74815	3.23762	2.43695	2.93401
Fcer1g	14127	AI573376|CD23|FcR-gamma|FcR[g]|FcRgamma|Fce1g|FcepsilonRI|Ly-50	Fc receptor, IgE, high affinity I, gamma polypeptide	2.7267	3.84341	3.7363	1.99032	3.87368	5.64361	4.13739	4.51897
Fcer2a	14128	CD23|Fce2|Fcer2|Ly-42	Fc receptor, IgE, low affinity II, alpha polypeptide	1.31166	1.03605	1.97076	0.405358	2.87368	0.915692	3.02192	2.12666
Fcgr1	14129	AI323638|AV092959|CD64|FcgammaRI|IGGHAFC	Fc receptor, IgG, high affinity I	3.81416	3.35798	3.81876	3.40536	3.87368	3.61613	3.75888	4.29658
Fcgr2b	14130	AI528646|CD32|F630109E10Rik|Fc[g]RII|FcgRII|Fcgr2|Fcgr2a|Fcr-2|Fcr-3|Ly-17|Ly-m20|LyM-1|Lym-1|fcRII	Fc receptor, IgG, low affinity IIb	3.89662	3.45109	3.81876	4.21271	4.09607	3.82258	4.52442	4.65022
Fcgr3	14131	CD16	Fc receptor, IgG, low affinity III	2.31166	1.77302	1.2338	1.40536	1.87368	0.915692	2.75888	2.44858
Flt3	14255	B230315G04|CD135|Flk-2|Flk2|Flt-3|Ly72|wmfl	FMS-like tyrosine kinase 3	4.63359	3.45109	4.04115	3.86479	4.45864	3.37512	3.43695	3.8271
Flt3l	14256	Flt3lg|Ly72L	FMS-like tyrosine kinase 3 ligand	5.79279	6.70848	6.80871	6.61481	6.33311	6.5739	6.24431	6.51897
Fn1	14268	E330027I09|Fn|Fn-1	fibronectin 1	13.8688	13.2127	13.3658	12.435	13.1973	14.5086	12.3937	14.0255
Fos	14281	D12Rfj1|c-fos|cFos	FBJ osteosarcoma oncogene	3.81416	3.91052	3.89676	4.40536	4.37618	4.82258	3.24431	4.12666
Fpr2	14289	E330010I07Rik|Fpr-rs2	formyl peptide receptor 2	1.7267	2.45109	1.64883	1.99032	1.87368	2.50065	3.75888	3.29658
Fut7	14347	AI853193|FTVII|Fuc-TVII|FucT-VII	fucosyltransferase 7	2.04863	2.62102	3.10827	2.72729	2.61064	3.08562	3.60688	2.12666
Fyn	14360	AI448320|AW552119	Fyn proto-oncogene	9.81814	9.74915	10.0719	9.85451	9.80047	10.2589	9.46209	9.91456
Gata3	14462	Gata-3|jal	GATA binding protein 3	7.73232	8.37293	8.05398	7.76291	8.21353	8.84938	8.30732	8.71911
Gbp2b	14468	Gbp-1|Gbp1|Mag-1|Mpa-1|Mpa1	guanylate binding protein 2b	3.31166	3.25845	3.55572	2.99032	3.74815	6.21947	3.43695	4.98464
Gfi1	14581	AW495828|Gfi-1|Pal-1|Pal1	growth factor independent 1	3.89662	3.97465	3.55572	3.72729	3.61064	4.08562	3.43695	4.21412
Glycam1	14663	MC26|Sgp50|glyCAM-1	glycosylation dependent cell adhesion molecule 1	1.31166	1.03605	2.2338	1.40536	2.28872	2.50065	2.43695	3.44858
Cmklr1	14747	ChemR23|DEZ|Gpcr27|mcmklr1	chemokine-like receptor 1	4.31166	2.45109	2.81876	3.40536	3.09607	3.08562	3.02192	2.12666
Gpi1	14751	Amf|Gpi|Gpi-1|Gpi-1r|Gpi-1s|Gpi-1t|Gpi1-r|Gpi1-s|Gpi1-t|Gpi1s|MF|NK|NK/GPI|Nlk|Org|Pgi|Phi	glucose phosphate isomerase 1	13.1374	12.8637	13.0202	12.9027	13.6955	13.9496	13.6214	13.7751
Ptgdr2	14764	Crth2|Gpr44|Grp45	prostaglandin D2 receptor 2	3.04863	2.04863	1.45109	2.25845	0.648834	2.81876	2.99032	2.72729
Cxcl1	14825	Fsp|Gro1|KC|Mgsa|N51|Scyb1|gro	chemokine (C-X-C motif) ligand 1	8.62455	8.71319	7.74159	8.59023	8.00982	7.71659	7.1512	6.71162
Gzma	14938	AW494114|Ctla-3|Ctla3|Hf|SE1|TSP-1|TSP1	granzyme A	3.42714	2.77302	3.10827	3.21271	3.74815	2.72305	3.75888	3.71162
Gzmb	14939	AI553453|CCP-1/C11|CCP1|Ctla-1|Ctla1|GZB	granzyme B	1.31166	0.451091	1.64883	1.99032	1.28872	0.915692	1.43695	2.12666
Gzmk	14945	-	granzyme K	1.7267	2.77302	1.64883	0.405358	1.28872	3.08562	2.43695	1.12666
H2-Aa	14960	Aalpha|H-2Aa|H2Aa|I-Aalpha|IAalpha|Ia-1|Ia1	histocompatibility 2, class II antigen A, alpha	3.53405	3.25845	3.89676	4.57528	3.61064	4.86989	5.08081	4.37458
H2-Ab1	14961	AI845868|Abeta|H-2Ab|H2-Ab|I-Abeta|IAb|Ia-2|Ia2|Rmcs1	histocompatibility 2, class II antigen A, beta 1	4.31166	2.62102	1.97076	3.21271	3.45864	4.82258	2.43695	4.51897
Cfb	14962	AI195813|AI255840|B|Bf|C2|Fb|H2-Bf	complement factor B	1.7267	1.45109	-0.351166	0.405358	1.87368	0.915692	2.43695	2.44858
H2-D1	14964	H-2D|H2-D	histocompatibility 2, D region locus 1	12.8761	12.8974	13.3793	12.8849	12.9711	13.9687	12.6822	13.4214
H2-Eb1	14969	Eb|H-2Eb|H2Eb|Ia-4|Ia4	histocompatibility 2, class II antigen E beta	1.7267	2.03605	2.2338	1.99032	2.61064	2.91569	1.43695	2.71162
H2-K1	14972	H-2K|H-2K(d)|H2-K|K-f	histocompatibility 2, K1, K region	12.9444	13.0409	13.5237	12.8353	12.9472	14.0698	12.5281	13.4415
H2-M3	14991	H-2M3|Hmt|M3a|MuprM3|MuprM301|MuprM302|R4B2	histocompatibility 2, M region locus 3	7.95552	7.92277	8.29989	7.94452	8.17746	8.67724	7.56624	8.11534
H2-DMa	14998	H-2Ma|H2-Ma	histocompatibility 2, class II, locus DMa	5.15296	5.80864	5.53148	5.31225	5.28872	5.74858	4.82927	5.08085
H2-DMb1	14999	AI385589|H-2Mb1|H2-Mb1	histocompatibility 2, class II, locus Mb1	2.89662	3.77302	3.64883	2.72729	3.98916	4.55955	3.60688	4.8271
H2-DMb2	15000	H-2Mb2|H2-Mb2	histocompatibility 2, class II, locus Mb2	1.7267	2.03605	2.45619	3.57528	2.87368	2.23762	2.43695	1.71162
H2-Ob	15002	A-beta-2|A-beta2|H-2Ab|H-2I|H-2Ob|H2-Ab|H2-Ab2|H2-IAb2|Ob	histocompatibility 2, O region beta locus	3.53405	4.35798	4.93424	3.72729	2.87368	2.91569	3.89638	3.58609
H2-Q1	15006	H-2Q1|Q1|Q1b|Q1d|Q1k|Qa-1|Qa1|Qed-1	histocompatibility 2, Q region locus 1	-0.2733	0.451091	1.2338	0.405358	2.28872	2.23762	0.436953	1.12666
H2-Q10	15007	H-2Q10|Q10|Qa10	histocompatibility 2, Q region locus 10	2.31166	2.77302	3.2338	3.57528	3.74815	3.91569	3.60688	4.03355
H2-Q2	15013	BE136769|ENSMUSG00000079507|Gm11132|H-2Q2|gs14-2	histocompatibility 2, Q region locus 2	2.04863	2.62102	1.2338	2.99032	2.87368	2.91569	3.43695	2.44858
H2-T23	15040	37b|37c|H-2T23|H2-Qa1|Qa-1|Qa-1(b)|Qa1|Qed-1|T18c|T18c(37)|T23b|T23d	histocompatibility 2, T region locus 23	8.00282	8.32454	9.01078	8.18014	8.37618	9.90721	7.92077	9.02752
Ifi44l	15061	H-28|H28|H28-1|NS1178	interferon-induced protein 44 like	2.53405	1.03605	1.64883	1.40536	2.87368	2.50065	1.43695	3.12666
Mr1	15064	H2ls	major histocompatibility complex, class I-related	8.73232	8.49549	9.13265	8.49811	9.00296	10.4722	8.60186	9.84433
H60a	15101	H60	histocompatibility 60a	11.217	11.6593	11.3932	11.4552	11.212	10.4836	10.9348	10.9706
Hc	15139	C5|C5a|He	hemolytic complement	2.53405	2.77302	2.81876	1.40536	3.28872	2.50065	2.43695	2.93401
Hck	15162	AI849071|Bmk	hemopoietic cell kinase	4.42714	3.03605	3.64883	3.21271	3.09607	3.82258	3.02192	3.12666
Foxj1	15223	FKHL-13|HFH-4|Hfh4	forkhead box J1	3.31166	2.45109	1.64883	1.99032	2.28872	0.915692	2.43695	2.93401
Hif1a	15251	AA959795|HIF-1-alpha|HIF1-alpha|HIF1alpha|MOP1|bHLHe78	hypoxia inducible factor 1, alpha subunit	11.8115	11.6431	11.7564	11.5576	11.5567	12.0768	11.1623	11.766
Mnx1	15285	HB9|Hlxb9|MNR2	motor neuron and pancreas homeobox 1	1.7267	2.45109	1.2338	0.405358	2.28872	2.72305	1.43695	2.44858
Hmgb1	15289	HMG-1|Hmg1|SBP-1|p30	high mobility group box 1	11.2837	11.5026	11.4778	11.4395	11.1652	11.0806	11.0153	11.1553
Hras	15461	H-ras|Ha-ras|Harvey-ras|Hras-1|Hras1|Kras2|c-H-ras|c-Ha-ras|c-rasHa|ras	Harvey rat sarcoma virus oncogene	4.18613	5.00568	5.32126	5.04921	4.68103	4.72305	5.08081	4.93401
Hsd11b1	15483	-	hydroxysteroid 11-beta dehydrogenase 1	3.04863	2.91052	3.45619	2.40536	3.28872	5.27324	2.02192	3.93401
Icam1	15894	CD54|Icam-1|Ly-47|MALA-2	intercellular adhesion molecule 1	3.18613	3.03605	3.81876	3.57528	2.87368	1.91569	4.43695	3.44858
Icam2	15896	CD102|Icam-2|Ly-60	intercellular adhesion molecule 2	3.18613	2.25845	2.64883	2.40536	3.45864	4.00315	3.75888	3.12666
Irf8	15900	AI893568|ICSBP|IRF-8|Icsbp1|Myls	interferon regulatory factor 8	2.04863	1.45109	2.64883	2.40536	3.09607	3.23762	2.02192	2.12666
Ido1	15930	Ido|Indo	indoleamine 2,3-dioxygenase 1	3.63359	2.45109	2.45619	3.40536	3.74815	3.37512	4.02192	3.8271
Cxcl10	15945	C7|CRG-2|INP10|IP-10|IP10|Ifi10|Scyb10|gIP-10|mob-1	chemokine (C-X-C motif) ligand 10	5.53405	8.32454	9.53758	8.37114	8.38147	10.6265	7.36769	9.29156
Ifit1	15957	ISG56|Ifi56|P56	interferon-induced protein with tetratricopeptide repeats 1	6.32661	8.45109	10.52	8.04921	9.81815	13.1364	8.41995	11.3899
Ifit2	15958	AV302338|Ifi54|P54	interferon-induced protein with tetratricopeptide repeats 2	9.1104	8.77977	9.60158	8.62453	10.1358	12.0581	9.24108	10.661
Ifit3	15959	Ifi49|P49	interferon-induced protein with tetratricopeptide repeats 3	5.7267	7.051	10.2543	6.26334	8.24872	13.764	5.79451	11.1386
Ifna1	15962	Ifa1	interferon alpha 1	3.7267	2.77302	3.64883	1.99032	3.09607	3.61613	2.43695	3.58609
Ifna2	15965	Ifa2	interferon alpha 2	2.31166	2.77302	2.64883	2.99032	3.09607	2.50065	2.43695	3.58609
Ifna4	15967	Ifa4	interferon alpha 4	2.04863	2.91052	3.34927	2.40536	3.74815	2.50065	3.75888	3.29658
Ifnar1	15975	CD118|Ifar|Ifnar|Ifrc|Infar	interferon (alpha and beta) receptor 1	9.35969	9.52255	9.73895	9.54235	9.46614	10.1373	9.27616	9.84946
Ifnar2	15976	AI747302|Ifnar-2	interferon (alpha and beta) receptor 2	8.42019	8.33373	8.61462	8.30018	8.54138	9.11291	8.56624	8.70786
Ifnb1	15977	IFN-beta|IFNB|Ifb	interferon beta 1, fibroblast	2.04863	1.03605	3.45619	1.40536	2.61064	4.16362	2.43695	2.71162
Ifng	15978	IFN-g|Ifg	interferon gamma	2.31166	1.77302	1.64883	2.40536	3.28872	3.37512	2.75888	3.12666
Ifngr1	15979	CD119|IFN-gammaR|Ifgr|Ifngr|Nktar	interferon gamma receptor 1	9.6124	9.9339	10.1919	9.97331	9.81228	10.0071	9.92479	9.69081
Cd79b	15985	B29|Ig-beta|Igb|Igbeta	CD79B antigen	2.04863	0.451091	2.45619	0.405358	2.28872	0.915692	2.02192	1.71162
Igf1r	16001	A330103N21Rik|CD221|D930020L01|IGF-1R|hyft	insulin-like growth factor I receptor	9.4167	9.15326	9.0433	9.04921	9.90894	9.79681	9.89433	9.8782
Igf2r	16004	AI661837|CD222|CI-MPR|M6P/IGF2R|Mpr300	insulin-like growth factor 2 receptor	7.02132	8.17219	8.35619	7.92892	8.266	9.24885	8.39115	9.05739
Igll1	16136	BB139905|Igl-5|Igll|Lambda5	immunoglobulin lambda-like polypeptide 1	2.31166	3.84341	3.34927	3.40536	2.61064	2.50065	3.02192	3.12666
Cd74	16149	CLIP|DHLAG|HLADG|Ia-GAMMA|Ii	CD74 antigen (invariant polypeptide of major histocompatibility complex, class II antigen-associated)	3.7267	3.97465	5.29269	3.40536	2.87368	5.40755	3.02192	4.12666
Ikbkb	16150	AI132552|IKK-2|IKK-beta|IKK2|IKK[b]|IKKbeta	inhibitor of kappaB kinase beta	9.31541	9.34136	9.40205	9.14007	9.266	9.54505	9.01815	9.34097
Ikbkg	16151	1110037D23Rik|AI848108|AI851264|AW124339|IKK[g]|NEMO	inhibitor of kappaB kinase gamma	8.071	7.55438	7.86315	7.288	7.71498	8.18715	7.09516	7.86812
Il10	16153	CSIF|Il-10	interleukin 10	2.53405	2.77302	2.97076	2.72729	2.61064	2.91569	0.436953	2.12666
Il10ra	16154	AW553859|CDw210|CDw210a|Il10r|mIL-10R	interleukin 10 receptor, alpha	2.31166	1.45109	1.97076	1.40536	1.28872	1.91569	2.02192	2.12666
Il11	16156	IL-11	interleukin 11	2.7267	1.45109	1.97076	3.21271	1.87368	1.91569	2.02192	2.93401
Il11ra1	16157	AI314697|GP130|Il-11ra|Il11ra|Il11ra2|NR1	interleukin 11 receptor, alpha chain 1	3.04863	2.62102	3.10827	4.1058	3.61064	3.37512	3.60688	3.93401
Il12a	16159	IL-12p35|Il-12a|Ll12a|p35	interleukin 12a	1.7267	2.03605	1.2338	3.57528	2.61064	2.50065	2.75888	3.58609
Il12b	16160	Il-12b|Il-12p40|Il12p40|p40	interleukin 12b	1.7267	2.45109	2.45619	2.99032	2.28872	1.91569	2.43695	2.12666
Il12rb1	16161	CD212|IL-12R[b]	interleukin 12 receptor, beta 1	3.42714	5.0658	5.53148	4.79768	2.61064	4.91569	3.24431	3.58609
Il12rb2	16162	A930027I18Rik|IL-12RB2|Ifnm	interleukin 12 receptor, beta 2	0.7267	0.451091	-0.351166	1.99032	2.61064	0.915692	0.436953	2.44858
Il13	16163	Il-13	interleukin 13	3.18613	2.03605	3.34927	3.86479	3.09607	3.37512	3.24431	2.93401
Il13ra1	16164	AI882074|CD213a1|IL-13R-alpha-1|IL-13r[a]|Il13ra|NR4	interleukin 13 receptor, alpha 1	9.89537	10.1934	10.6754	10.288	9.87368	10.496	9.8357	10.0939
Il13ra2	16165	CD213a2|IL-13R-alpha-2	interleukin 13 receptor, alpha 2	2.04863	2.62102	2.64883	0.405358	2.28872	2.72305	3.02192	2.12666
Il15	16168	AI503618|IL-15	interleukin 15	2.04863	4.58037	4.64883	4.57528	3.45864	5.30801	4.02192	4.29658
Il15ra	16169	AA690181|IL-15RA	interleukin 15 receptor, alpha chain	5.7267	6.0658	6.00639	5.76291	6.07008	6.86989	5.92881	5.68124
Il16	16170	mKIAA4048	interleukin 16	2.89662	2.25845	2.2338	2.72729	3.61064	2.23762	2.02192	2.12666
Il17a	16171	Ctla-8|Ctla8|IL-17|IL-17A|Il17	interleukin 17A	3.04863	0.451091	1.64883	3.57528	3.28872	3.08562	2.43695	1.12666
Il17ra	16172	AW538159|Cdw217|Il17r|VDw217	interleukin 17 receptor A	8.69537	9.03229	9.04544	8.83999	9.47111	9.09311	8.85902	9.12101
Il18	16173	Igif|Il-18	interleukin 18	8.86881	8.26487	9.09798	8.04921	7.85857	9.19878	6.79451	8.83401
Il18rap	16174	AcPL|IL-18R-beta|IL-18RAcP|IL-18Rbeta|IL-1RAcPL	interleukin 18 receptor accessory protein	7.07543	6.32146	6.99756	6.95995	4.74815	4.55955	4.82927	4.51897
Il1a	16175	Il-1a	interleukin 1 alpha	2.04863	2.77302	2.64883	3.40536	2.61064	2.50065	3.02192	2.44858
Il1b	16176	IL-1beta|Il-1b	interleukin 1 beta	1.7267	2.25845	1.97076	1.99032	3.09607	-0.0843081	2.75888	2.12666
Il1r1	16177	CD121a|CD121b|IL-1R1|IL-iR|Il1r-1	interleukin 1 receptor, type I	6.79279	7.14458	7.34232	7.02007	6.35481	5.47028	5.79451	5.74137
Il1r2	16178	CD121b|Il1r-2	interleukin 1 receptor, type II	3.7267	2.77302	2.2338	3.21271	2.61064	2.23762	2.43695	3.12666
Irak1	16179	AA408924|IRAK|IRAK-1|IRAK1-S|IRAK1b|Il1rak|Plpk|mPLK	interleukin-1 receptor-associated kinase 1	8.88909	8.5778	8.868	8.60993	8.75224	9.04755	8.7768	9.10394
Il1rap	16180	6430709H04Rik|AI255955|AV239853|IL-1RAcP	interleukin 1 receptor accessory protein	8.85598	8.75715	9.06879	8.59023	9.40766	9.51932	9.11995	9.11818
Il1rn	16181	F630041P17Rik|IL-1ra	interleukin 1 receptor antagonist	3.63359	5.12352	7.13265	5.44975	4.68103	4.16362	4.13739	5.12666
Il18r1	16182	Il18ralpha|Il1rrp	interleukin 18 receptor 1	1.31166	3.03605	3.2338	3.21271	2.28872	3.37512	3.43695	3.58609
Il2	16183	Il-2	interleukin 2	2.7267	1.45109	2.45619	3.57528	2.61064	2.91569	4.02192	1.71162
Il2ra	16184	CD25|Il2r|Ly-43	interleukin 2 receptor, alpha chain	3.18613	2.91052	1.97076	2.99032	2.28872	2.91569	0.436953	1.71162
Il2rb	16185	CD122|IL-15Rbeta|IL15Rbeta|Il-2/15Rbeta|Il-2Rbeta|p70	interleukin 2 receptor, beta chain	5.11902	4.91052	4.64883	4.49282	4.09607	4.37512	3.89638	3.8271
Il2rg	16186	CD132|[g]c|gamma(c)|gc|p64	interleukin 2 receptor, gamma chain	2.53405	3.35798	2.97076	1.99032	0.288717	2.23762	2.43695	1.71162
Il3	16187	BPA|Csfmu|HCGF|Il-3|MCGF|PSF	interleukin 3	-0.2733	2.25845	0.648834	0.405358	2.61064	-0.0843081	1.43695	2.44858
Il3ra	16188	CD123|CDw123|SUT-1	interleukin 3 receptor, alpha chain	2.89662	1.77302	2.2338	2.72729	2.87368	2.23762	3.24431	3.44858
Il4	16189	BSF-1|Il-4	interleukin 4	1.31166	1.77302	2.64883	0.405358	2.28872	1.50065	2.02192	3.12666
Il4ra	16190	CD124|Il4r	interleukin 4 receptor, alpha	7.44095	8.80424	8.64601	8.19326	8.1529	7.76118	8.03687	7.55292
Il5	16191	Il-5	interleukin 5	1.7267	2.03605	1.64883	1.40536	2.28872	0.915692	3.43695	2.93401
Il5ra	16192	CD125|CDw125|Il5r	interleukin 5 receptor, alpha	1.31166	3.03605	3.2338	2.99032	3.45864	3.72305	2.75888	4.03355
Il6	16193	Il-6	interleukin 6	3.04863	2.25845	1.2338	2.99032	3.09607	4.00315	3.43695	2.12666
Il6ra	16194	CD126|IL-6R|IL-6R-alpha|IL-6RA|Il6r	interleukin 6 receptor, alpha	8.13184	8.30907	8.27819	8.09186	9.1057	8.13486	8.4085	8.83056
Il6st	16195	5133400A03Rik|AA389424|BB405851|CD130|D13Ertd699e|gp130	interleukin 6 signal transducer	9.82341	10.0435	10.0677	9.85244	9.73373	9.52302	9.67774	9.60441
Il7	16196	A630026I06Rik|Il-7|hlb368	interleukin 7	3.89662	6.00568	6.12457	5.49282	5.28872	5.55955	5.43695	5.08085
Il7r	16197	CD127|IL-7Ralpha	interleukin 7 receptor	2.04863	2.45109	2.45619	3.40536	2.87368	2.23762	3.43695	2.93401
Il9	16198	Il-9|P40	interleukin 9	2.89662	2.03605	2.2338	1.99032	1.28872	-0.0843081	2.43695	2.93401
Ilf3	16201	MBII-26|MPHOSPH4|NF90|NFAR	interleukin enhancer binding factor 3	9.54688	9.24063	9.12659	9.06714	9.51513	9.63679	9.29182	9.60036
Inpp5d	16331	SHIP|SHIP-1|SHIP1|SIP-145|p150Ship|s-SHIP	inositol polyphosphate-5-phosphatase D	2.53405	2.77302	3.34927	3.40536	3.09607	2.23762	3.24431	3.12666
Irf1	16362	AU020929|Irf-1	interferon regulatory factor 1	9.88405	10.5694	11.1457	10.4277	10.5648	11.3128	9.9992	11.2707
Irf2	16363	9830146E22Rik|AI646973|Irf-2	interferon regulatory factor 2	8.64258	8.75715	8.78326	8.59023	8.43338	9.01372	8.37359	8.49734
Irf4	16364	AI385587|IRF-4|LSIRF|Spip	interferon regulatory factor 4	2.31166	1.77302	1.2338	2.40536	3.98916	2.23762	3.60688	2.71162
Itch	16396	6720481N21Rik|8030492O04Rik|A130065M08|AIP4|C230047C07Rik	itchy, E3 ubiquitin protein ligase	10.3579	10.1541	10.0814	9.95803	10.4896	10.8166	10.3393	10.6354
Itga2	16398	CD49B|DX5	integrin alpha 2	5.55959	5.71788	5.75736	6.53464	4.53664	4.82258	5.92881	5.33611
Itga2b	16399	AI172977|CD41|CD41B|GpIIb|alphaIIb	integrin alpha 2b	2.04863	2.25845	2.97076	3.21271	1.28872	2.91569	3.24431	3.58609
Itga4	16401	CD49D|Itga4B	integrin alpha 4	2.53405	1.77302	1.2338	2.72729	0.288717	-0.0843081	2.43695	1.71162
Itga5	16402	Cd49e|Fnra|VLA5	integrin alpha 5 (fibronectin receptor alpha)	9.8313	9.43978	9.64883	9.28494	10.0132	10.6764	9.52176	10.3793
Itga6	16403	5033401O05Rik|AI115430|Cd49f|VLA-6	integrin alpha 6	9.94587	9.91768	9.82001	9.79982	9.56484	9.43533	9.82497	9.40974
Itgae	16407	A530055J10|CD103|aM290|alpha-E1|alpha-M290	integrin alpha E, epithelial-associated	3.04863	0.451091	3.45619	2.99032	1.87368	3.37512	3.24431	2.71162
Itgal	16408	(p180)|Cd11a|LFA-1|LFA-1A|Ly-15|Ly-21	integrin alpha L	3.42714	2.25845	2.81876	2.99032	3.28872	3.82258	3.60688	3.93401
Itgam	16409	CD11b/CD18|CR3|CR3A|Cd11b|F730045J24Rik|Ly-40|MAC1|Mac-1|Mac-1a	integrin alpha M	4.11902	3.53855	2.81876	2.99032	3.74815	4.00315	3.60688	3.71162
Itgax	16411	AI449405|Cd11c|Cr4|N418	integrin alpha X	2.89662	0.451091	1.64883	2.72729	2.61064	-0.0843081	2.02192	2.12666
Itgb1	16412	4633401G24Rik|AA409975|AA960159|CD29|ENSMUSG00000051907|Fnrb|Gm9863|gpIIa	integrin beta 1 (fibronectin receptor beta)	13.6269	13.2757	13.3369	13.2575	13.2964	13.5358	13.1668	13.2601
Itgb2	16414	2E6|AI528527|Cd18|LAD|LCAMB|Lfa1|MF17	integrin beta 2	5.48159	5.51718	6.54365	5.89721	6.37618	6.5156	5.08081	6.33611
Itgb3	16416	CD61|GP3A|INGRB3	integrin beta 3	2.53405	2.62102	1.97076	3.21271	2.28872	3.23762	3.89638	3.58609
Cd47	16423	9130415E20Rik|AA407862|AI848868|AW108519|B430305P08Rik|IAP|Itgp	CD47 antigen (Rh-related antigen, integrin-associated signal transducer)	10.0271	10.1084	10.5277	10.1299	9.09607	10.1988	8.74984	9.55292
Itk	16428	Emt|Tcsk|Tsk	IL2 inducible T cell kinase	1.7267	1.03605	1.97076	0.405358	2.61064	0.915692	2.02192	3.29658
Jak1	16451	AA960307|BAP004|C130039L05Rik	Janus kinase 1	10.6328	10.5674	10.52	10.4082	10.851	11.1988	10.7453	11.0016
Jak2	16452	Fd17	Janus kinase 2	8.42367	8.21596	8.4722	8.07778	8.83946	9.68553	8.47587	9.31895
Jak3	16453	fae|wil	Janus kinase 3	5.77109	5.45109	5.34927	5.16024	5.19561	5.67058	5.43695	5.8271
Jun	16476	AP-1|Junc|c-jun	jun proto-oncogene	10.0373	10.2076	9.82501	10.1502	9.94156	10.5837	10.127	10.1351
Kdr	16542	6130401C07|Flk-1|Flk1|Krd-1|Ly73|VEGFR-2|VEGFR2|sVEGFR-2	kinase insert domain protein receptor	0.7267	1.45109	2.2338	0.405358	2.87368	2.91569	0.436953	2.44858
Kit	16590	Bs|CD117|Fdc|Gsfsco1|Gsfsco5|Gsfsow3|SCO1|SCO5|SOW3|Ssm|Tr-kit|W|c-KIT	kit oncogene	3.7267	4.03605	3.2338	3.86479	4.28872	3.37512	4.82927	3.93401
Klra1	16627	A1|CH29-493D4.3|Klra22|Ly49a|Ly49o<129>|Ly49v	killer cell lectin-like receptor, subfamily A, member 1	2.04863	2.25845	2.2338	2.72729	0.288717	-0.0843081	2.75888	2.12666
Klra2	16633	Klra30|Ly49b	killer cell lectin-like receptor, subfamily A, member 2	4.11902	4.15153	4.97076	4.1058	4.87368	3.50065	3.24431	4.12666
Klra3	16634	5E6|Ly49c|NK-2.1|Nk-2|Nk2|Nk2.1	killer cell lectin-like receptor, subfamily A, member 3	1.7267	1.45109	1.2338	2.99032	2.28872	1.50065	1.43695	1.71162
Klra4	16635	Chok|Klra32|Klra33|Ly-49d|Ly49d|ly49r<129>	killer cell lectin-like receptor, subfamily A, member 4	7.31166	7.29658	7.20342	7.64376	6.17136	5.74858	6.13739	6.25594
Klra5	16636	Ly49e	killer cell lectin-like receptor, subfamily A, member 5	2.04863	0.451091	3.10827	3.21271	3.28872	2.91569	4.34384	3.44858
Klra6	16637	Ly49f|ly-49f	killer cell lectin-like receptor, subfamily A, member 6	2.53405	1.77302	3.2338	3.57528	3.98916	3.23762	3.89638	2.93401
Klra7	16638	LGL-1|Ly-49G.1|Ly-49G.2|Ly-49G.3|Ly49G.4|Ly49g|Ly49g1|Ly49g2	killer cell lectin-like receptor, subfamily A, member 7	-0.2733	-0.548909	-0.351166	0.405358	0.288717	-0.0843081	2.02192	0.126656
Klrc1	16641	CD159a|NKG2A|NKG2B	killer cell lectin-like receptor subfamily C, member 1	3.18613	2.45109	2.45619	1.40536	2.61064	2.91569	3.02192	3.71162
Klrc2	16642	NKG2C	killer cell lectin-like receptor subfamily C, member 2	-0.2733	-0.548909	0.648834	1.40536	0.288717	-0.0843081	1.43695	1.71162
Klrd1	16643	CD94	killer cell lectin-like receptor, subfamily D, member 1	2.53405	2.03605	2.45619	3.21271	2.87368	1.91569	4.24431	3.44858
Lag3	16768	CD223|LAG-3|Ly66	lymphocyte-activation gene 3	2.31166	2.77302	2.45619	2.99032	3.28872	3.08562	3.60688	3.12666
Lamp1	16783	AI196048|CD107a|Lamp-1	lysosomal-associated membrane protein 1	13.2668	12.7266	12.9716	12.62	12.7617	13.3318	12.4936	13.0108
Lamp2	16784	CD107b|LGP-B|Lamp II|Lamp-2|Lamp-2a|Lamp-2b|Lamp-2c|Mac3	lysosomal-associated membrane protein 2	12.3923	12.241	12.6954	12.2994	12.1486	13.1815	11.7989	12.6473
Lbp	16803	Bpifd2|Ly88	lipopolysaccharide binding protein	3.04863	5.09495	6.84851	4.57528	4.19561	7.68388	3.24431	5.77051
Lck	16818	Hck-3|Lsk|Lskt|p56<lck>|p56Lck	lymphocyte protein tyrosine kinase	-0.2733	1.45109	1.2338	2.72729	1.87368	2.50065	2.43695	1.12666
Lcn2	16819	24p3|AW212229|Sip24	lipocalin 2	4.18613	3.25845	5.20342	4.40536	3.98916	5.55955	3.89638	4.21412
Lgals3	16854	GBP|L-34|Mac-2|gal3	lectin, galactose binding, soluble 3	15.5715	15.6057	15.7704	15.7053	15.2801	15.3823	15.2378	15.3318
Lif	16878	-	leukemia inhibitory factor	8.18613	8.86472	8.43019	8.5551	10.2717	9.60744	8.12345	8.57374
Gzmm	16904	Lmet1|MMET-1	granzyme M (lymphocyte met-ase 1)	2.89662	3.91052	3.2338	3.57528	3.09607	3.50065	3.60688	3.71162
Psmb9	16912	Lmp-2|Lmp2	proteasome (prosome, macropain) subunit, beta type 9 (large multifunctional peptidase 2)	6.63359	6.67026	7.61462	7.03471	6.62857	8.58103	6.7768	7.96586
Psmb8	16913	Lmp-7|Lmp7	proteasome (prosome, macropain) subunit, beta type 8 (large multifunctional peptidase 7)	11.3665	11.7696	12.2647	11.9695	11.4244	12.6687	11.1452	11.9288
Anxa1	16952	Anx-1|Anx-A1|C430014K04Rik|Lpc-1|Lpc1	annexin A1	12.3421	12.5287	12.613	12.3512	12.6992	12.8641	12.4214	12.4886
Xcl1	16963	AI661682|ATAC|LTN|Lptn|SCM-1|SCM-1a|Scyc1	chemokine (C motif) ligand 1	2.31166	2.62102	1.97076	2.72729	3.09607	-0.0843081	3.43695	2.71162
Lrp1	16971	A2mr|AI316852|CD91|Lrp|b2b1554Clo	low density lipoprotein receptor-related protein 1	11.8685	11.3991	11.0566	11.1101	11.0758	11.255	11.3706	11.4748
Lrrn3	16981	NLRR-3	leucine rich repeat protein 3, neuronal	4.97463	6.59064	6.43019	5.72729	4.61064	4.37512	3.60688	4.77051
Lta	16992	LT|LT-[a]|LT-alpha|LT[a]|LTalpha|Ltx|TNF-beta|TNFSF1|Tnfb|Tnfsf1b|hlb382	lymphotoxin A	4.37056	3.97465	3.64883	3.57528	4.61064	3.82258	3.02192	3.8271
Ltb	16994	AI662801|LTbeta|Tnfc|Tnfsf3|p33	lymphotoxin B	1.31166	0.451091	0.648834	0.405358	2.28872	2.23762	0.436953	0.126656
Ltbr	17000	AI256028|CD18|LTbetaR|Ltar|TNF-R-III|TNFCR|TNFR-RP|TNFR2-RP|TNFRrp|Tnfbr|Tnfrsf3	lymphotoxin B receptor	10.0051	10.0342	10.307	10.0848	10.3304	10.448	9.97805	10.2713
Ltf	17002	Csp82|Lf|MMS10R|Ms10r	lactotransferrin	2.31166	2.45109	2.2338	1.99032	2.28872	2.23762	3.02192	3.12666
Ltk	17005	-	leukocyte tyrosine kinase	3.31166	-0.548909	2.81876	3.40536	2.61064	2.50065	3.24431	3.12666
Klrb1c	17059	AI462337|CD161|Ly-59|Ly55c|Ly59|NK-RP1|NK1.1|NKR-P1.9|NKRP1|NKRP140|Nk-1|Nk-1.2|Nk1|Nk1.2|Nkrp1c|ly-55c	killer cell lectin-like receptor subfamily B member 1C	2.7267	2.25845	1.64883	0.405358	3.28872	2.91569	2.43695	1.12666
Blnk	17060	BASH|Bca|Ly-57|Ly57|Lyw-57|SLP-65	B cell linker	8.60628	10.155	10.4367	10.2711	5.81228	6.39143	5.86322	6.03355
Epcam	17075	CD326|EGP|EGP-2|Egp314|Ep-CAM|EpCAM1|GA733-2|Ly74|TROP1|Tacsd1|Tacstd1|gp40	epithelial cell adhesion molecule	2.53405	3.35798	3.45619	2.99032	2.61064	3.23762	4.02192	3.8271
Cd180	17079	F630107B15|Ly78|RP105	CD180 antigen	2.53405	1.77302	1.97076	1.99032	2.87368	2.91569	3.02192	2.93401
Il1rl1	17082	DER4|Fit-1|Ly84|ST2L|St2|St2-rs1|T1|T1/ST2	interleukin 1 receptor-like 1	7.49488	7.13057	7.60303	7.02007	5.45864	4.16362	5.02192	4.51897
Tmed1	17083	Il1rl1l|Ly84l|St2l	transmembrane emp24 domain containing 1	9.20648	9.05286	9.17435	8.96378	9.29714	9.33776	9.34984	9.39578
Ly86	17084	MD-1|MD1	lymphocyte antigen 86	1.7267	0.451091	0.648834	1.99032	2.28872	2.23762	2.43695	2.93401
Ly9	17085	AI893573|CD229|Lgp100|Ly-9|SLAMF3|T100	lymphocyte antigen 9	2.04863	1.03605	1.2338	1.40536	0.288717	2.72305	3.24431	2.93401
Ncr1	17086	Ly94|NKp46	natural cytotoxicity triggering receptor 1	-0.2733	2.45109	2.64883	0.405358	1.28872	2.72305	2.75888	2.12666
Ly96	17087	ESOP-1|MD-2|MD2	lymphocyte antigen 96	8.25808	8.27764	8.4465	8.16024	8.88863	9.20801	8.08801	9.08376
Lyn	17096	AA407514|Hck-2|p53Lyn|p56Lyn	Yamaguchi sarcoma viral (v-yes-1) oncogene homolog	6.95552	7.85197	8.03685	7.91315	8.52712	8.48934	8.45376	8.49734
Lyz2	17105	AI326280|Lys|Lysm|Lyzs|Lzm|Lzm-s1|Lzp	lysozyme 2	8.31166	8.1093	8.69323	7.60503	8.14047	8.80748	7.40274	8.32141
Smad2	17126	7120426M23Rik|Madh2|Madr2|Smad-2|mMad2	SMAD family member 2	8.35969	8.34287	8.28183	8.37114	8.66376	8.50065	8.28244	8.61047
Smad3	17127	AU022421|Madh3	SMAD family member 3	9.54368	9.74226	9.89557	9.44428	10.6441	11.0508	9.36769	11.1068
Smad4	17128	AW743858|D18Wsu70e|DPC4|Madh4	SMAD family member 4	10.4053	10.037	10.0814	10.1075	10.1956	10.2308	10.1784	10.2404
Maf	17132	2810401A20Rik|A230108G15Rik|AW047063|c-maf	avian musculoaponeurotic fibrosarcoma (v-maf) AS42 oncogene homolog	5.15296	3.91052	3.7363	3.57528	4.09607	4.86989	4.13739	5.29658
Mapkapk2	17164	AA960234|MAPKAP-K2|MK-2|MK2|Rps6kc1	MAP kinase-activated protein kinase 2	10.8055	10.6329	10.7183	10.4902	11.0503	11.2622	10.699	10.9714
Marco	17167	AI323439|Ly112|Scara2	macrophage receptor with collagenous structure	2.89662	1.45109	0.648834	1.40536	2.61064	1.50065	1.43695	2.12666
Masp1	17174	AW048060|CCPII|Crarf|Masp1/3	mannan-binding lectin serine peptidase 1	9.6896	9.29971	9.56919	8.97521	10.02	10.7166	9.14431	10.1724
Masp2	17175	MASP-2|MAp19	mannan-binding lectin serine peptidase 2	2.04863	2.25845	2.81876	3.21271	3.09607	2.72305	2.02192	2.12666
Mbl2	17195	L-MBP|MBL|MBL-C|MBP-C	mannose-binding lectin (protein C) 2	2.04863	1.45109	1.2338	3.21271	2.61064	1.91569	2.02192	2.12666
Cd46	17221	Mcp	CD46 antigen, complement regulatory protein	0.7267	1.77302	1.64883	1.99032	0.288717	2.50065	0.436953	3.29658
Cma1	17228	MMCP-5|Mcp-5|Mcp5|Mcpt5	chymase 1, mast cell	2.7267	2.25845	2.45619	1.99032	3.98916	4.23762	4.34384	4.12666
Mef2c	17260	5430401D19Rik|9930028G15Rik|AV011172|Mef2|Mef2c_Mm	myocyte enhancer factor 2C	7.91652	7.95094	8.28546	7.79768	9.02681	9.90011	8.63663	9.40511
Mertk	17289	Eyk|Mer|Nyk|nmf12	c-mer proto-oncogene tyrosine kinase	2.89662	2.77302	3.34927	3.21271	5.81228	5.86989	4.13739	6.33611
Mfge8	17304	AA408458|AI325141|MFG-E8|MP47|Mfgm|P47|SED1|lactadherin	milk fat globule-EGF factor 8 protein	11.0571	10.5906	11.1467	10.5927	10.6027	11.3592	10.437	11.0146
Mif	17319	GIF|Glif	macrophage migration inhibitory factor	14.6414	14.2259	14.4256	14.2968	14.6371	14.7075	14.5484	14.61
Cxcl9	17329	BB139920|CMK|Mig|MuMIG|Scyb9|crg-10	chemokine (C-X-C motif) ligand 9	2.04863	-0.548909	2.64883	1.99032	2.28872	2.91569	2.43695	2.44858
Mme	17380	6030454K05Rik|C85356|CALLA|CD10|NEP|SFE	membrane metallo endopeptidase	10.0339	9.41832	10.3699	8.58527	10.1137	11.8349	9.20182	11.2286
Mmp9	17395	AW743869|B/MMP9|Clg4b|MMP-9|pro-MMP-9	matrix metallopeptidase 9	2.31166	3.53855	3.81876	3.57528	4.09607	3.61613	3.24431	3.12666
Psmd7	17463	AW107203|Mov-34|Mov34	proteasome (prosome, macropain) 26S subunit, non-ATPase, 7	11.7847	11.6865	11.736	11.6704	11.427	11.3592	11.4049	11.3692
Cd200	17470	Mox2|OX2	CD200 antigen	9.55959	9.26647	9.38861	9.40536	8.50788	9.47602	8.41995	8.91456
Mpo	17523	mKIAA4033	myeloperoxidase	3.53405	2.62102	2.97076	2.40536	2.28872	3.23762	3.60688	3.71162
Mrc1	17533	AW259686|CD206|MR	mannose receptor, C type 1	2.53405	2.45109	2.81876	2.99032	0.288717	-0.0843081	2.02192	2.71162
Muc1	17829	CD227|EMA|Muc-1	mucin 1, transmembrane	2.89662	3.62102	4.2338	3.86479	3.61064	2.91569	2.43695	2.71162
Mx1	17857	AI893580|Mx|Mx-1	MX dynamin-like GTPase 1	1.7267	3.03605	2.97076	2.40536	3.09607	3.37512	3.75888	2.93401
Mx2	17858	AI528743|Mx-2	MX dynamin-like GTPase 2	-0.2733	3.69902	6.5677	3.99032	2.87368	8.86989	2.43695	6.53605
Myc	17869	AU016757|Myc2|Niard|Nird|bHLHe39	myelocytomatosis oncogene	11.2019	11.5531	10.8577	11.4263	11.5361	11.0887	11.2068	10.6764
Myd88	17874	-	myeloid differentiation primary response gene 88	6.9651	8.14109	8.47856	8.26334	8.48839	8.7549	7.84634	8.38875
Ncam1	17967	CD56|E-NCAM|NCAM-1|Ncam	neural cell adhesion molecule 1	12.0947	11.2085	11.167	10.9705	11.2638	11.2853	11.1129	11.3829
Ncf4	17972	AI451400|p40phox	neutrophil cytosolic factor 4	3.53405	6.03605	6.71492	5.76291	5.45864	6.92692	5.24431	6.25594
Nfatc1	18018	2210017P03Rik|AI449492|AV076380|NF-ATc|NFAT2|NFATc|Nfatcb	nuclear factor of activated T cells, cytoplasmic, calcineurin dependent 1	7.90163	7.78201	7.66006	7.43878	7.9822	7.08562	7.52442	7.77051
Nfatc2	18019	AI607462|NF-ATc2|NF-ATp|NFAT1|NFAT1-D|Nfatp	nuclear factor of activated T cells, cytoplasmic, calcineurin dependent 2	4.53405	5.0658	4.29269	5.49282	4.74815	4.72305	5.92881	5.03355
Nfatc3	18021	C80703|D8Ertd281e|NFAT4|NFATx	nuclear factor of activated T cells, cytoplasmic, calcineurin dependent 3	9.16549	9.08953	8.93655	9.04198	8.83561	8.74541	8.86741	8.88488
Nfkb1	18033	NF-KB1|NF-kappaB|NF-kappaB1|p105|p50|p50/p105	nuclear factor of kappa light polypeptide gene enhancer in B cells 1, p105	11.2155	11.0782	11.1507	10.9941	11.5109	11.6248	11.2587	11.5093
Nfkb2	18034	NF-kappaB2|lyt|p49|p49/p100|p50B|p52	nuclear factor of kappa light polypeptide gene enhancer in B cells 2, p49/p100	10.4774	11.1235	10.9509	11.0875	11.1232	11.3654	11.284	11.1096
Nfkbia	18035	AI462015|Nfkbi	nuclear factor of kappa light polypeptide gene enhancer in B cells inhibitor, alpha	8.38848	9.22588	9.15266	9.06714	8.99952	9.00315	8.68488	9.31648
Nefl	18039	AI847934|CMT2E|NF-L|NF68|Nfl	neurofilament, light polypeptide	2.89662	1.77302	1.2338	2.40536	1.28872	2.23762	2.43695	2.93401
Cd244	18106	2B4|C9.1|F730046O15Rik|Ly90|NAIL|NKR2B4|Nmrk|SLAMF4	CD244 natural killer cell receptor 2B4	2.7267	2.62102	2.2338	1.99032	3.09607	2.91569	3.89638	4.44858
Nos2	18126	MAC-NOS|NOS-II|Nos-2|Nos2a|i-NOS|iNOS	nitric oxide synthase 2, inducible	3.7267	3.62102	3.97076	4.57528	4.98916	4.23762	4.13739	4.88154
Notch1	18128	9930111A19Rik|Mis6|N1|Tan1|lin-12	notch 1	7.59706	7.49549	7.34232	7.04921	7.418	8.18248	6.86322	7.87485
Slc11a1	18173	Bcg|Ity|Lsh|Nramp|Nramp1|ity	solute carrier family 11 (proton-coupled divalent metal ion transporters), member 1	3.18613	3.53855	3.34927	3.99032	4.28872	4.00315	3.24431	4.03355
Nrp1	18186	C530029I03|NP-1|NPN-1|Npn1|Nrp	neuropilin 1	10.7622	10.3885	10.3674	10.1851	10.0569	9.9436	10.0608	9.99856
Tnfrsf11b	18383	OCIF|Opg|TR1	tumor necrosis factor receptor superfamily, member 11b (osteoprotegerin)	8.94829	7.55962	8.35619	7.66275	7.42827	8.90153	6.21831	8.56545
Osm	18413	OncoM	oncostatin M	2.53405	2.25845	1.2338	2.72729	3.09607	1.91569	3.24431	3.12666
Pax5	18507	BSAP|EBB-1|KLP|Pax-5	paired box 5	2.53405	1.77302	1.2338	2.40536	1.87368	1.91569	2.43695	2.44858
Pdcd1	18566	Ly101|PD-1|Pdc1	programmed cell death 1	2.31166	2.45109	2.64883	2.72729	2.61064	2.50065	2.43695	3.29658
Pdgfrb	18596	AI528809|CD140b|PDGFR-1|Pdgfr	platelet derived growth factor receptor, beta polypeptide	7.79279	5.97465	6.2338	5.44975	6.69811	7.04497	5.86322	7.48421
Pecam1	18613	C85791|Cd31|PECAM-1|Pecam	platelet/endothelial cell adhesion molecule 1	-0.2733	2.45109	-0.351166	1.40536	1.28872	1.91569	1.43695	1.12666
Cfp	18636	BCFG|Pfc	complement factor properdin	4.58468	4.49549	4.29269	4.1058	4.28872	4.37512	4.43695	4.12666
Prf1	18646	Pfn|Pfp|Prf-1	perforin 1 (pore forming protein)	1.31166	1.77302	1.2338	0.405358	0.288717	2.50065	0.436953	1.12666
Abcb1a	18671	Abcb4|Evi32|Mdr1a|Mdr3|P-gp|Pgp|Pgy-3|Pgy3|mdr-3	ATP-binding cassette, sub-family B (MDR/TAP), member 1A	7.69824	4.45109	6.49432	5.72729	2.87368	5.67058	3.60688	4.37458
Pik3cd	18707	2410099E07Rik|2610208K16Rik|AW545373|p110delta	phosphatidylinositol 3-kinase catalytic delta polypeptide	3.81416	4.87736	5.2338	4.79768	5.19561	4.82258	4.24431	5.03355
Prkcd	18753	AI385711|D14Ertd420e|PKC[d]|PKCdelta|Pkcd	protein kinase C, delta	8.03958	8.75943	8.82625	8.7804	9.24	9.51002	8.96052	9.22732
Prkce	18754	5830406C15Rik|PKC[e]|PKCepsilon|Pkce|R75156	protein kinase C, epsilon	7.4132	7.1858	7.63752	7.27572	7.47854	7.62305	7.12345	7.78487
Pla2g1b	18778	Pla2a|sPLA2IB	phospholipase A2, group IB, pancreas	2.31166	1.77302	0.648834	2.72729	3.28872	-0.0843081	2.75888	1.71162
Serpinb2	18788	PAI-2|Planh2|ovalbumin	serine (or cysteine) peptidase inhibitor, clade B, member 2	3.89662	2.91052	2.97076	3.21271	1.28872	3.61613	3.43695	3.44858
Plau	18792	u-PA|uPA	plasminogen activator, urokinase	7.76562	8.53058	8.81625	8.14007	8.99608	8.61266	8.39115	8.97528
Plaur	18793	Cd87|u-PAR|uPAR	plasminogen activator, urokinase receptor	9.90412	10.7173	10.351	10.5602	11.0411	9.23987	10.3692	9.44633
Lcp1	18826	AW536232|D14Ertd310e|LCP-1|Pls2|pp65	lymphocyte cytosolic protein 1	7.02132	4.53855	4.60303	4.31225	7.31108	8.39547	5.64641	7.9532
Ccl21a	18829	6CKBAC2|6Ckine|ALP|AW987545|CKb9|SCYA21a|SLC|Scya21|Scya21b|Tca4|plt	chemokine (C-C motif) ligand 21A (serine)	2.04863	1.03605	1.97076	3.21271	3.09607	3.08562	3.02192	3.12666
Pml	18854	1200009E24Rik|AI661194|Trim19	promyelocytic leukemia	9.40794	9.55569	9.66842	9.47682	8.87743	9.97233	9.30732	9.40743
Pou2af1	18985	BOB.1|Bob-1|Bob1|OBF-1|OBF.1|OCA-B|OCAB	POU domain, class 2, associating factor 1	3.53405	2.91052	2.81876	3.40536	3.87368	2.72305	3.60688	2.44858
Pou2f2	18987	Oct-2|Oct2a|Oct2b|Otf-2|Otf2	POU domain, class 2, transcription factor 2	2.31166	1.77302	2.64883	0.405358	1.87368	1.91569	2.43695	0.126656
Pparg	19016	Nr1c3|PPAR-gamma|PPAR-gamma2|PPARgamma|PPARgamma2	peroxisome proliferator activated receptor gamma	1.31166	2.62102	2.2338	1.40536	0.288717	2.50065	2.02192	2.44858
Prg2	19074	MBP|mMBP|mMBP-1	proteoglycan 2, bone marrow	3.53405	1.03605	2.45619	2.40536	4.28872	3.61613	3.75888	3.93401
Mapk11	19094	P38b|Prkm11|Sapk2|Sapk2b|p38-2|p38beta|p38beta2	mitogen-activated protein kinase 11	6.15296	6.64092	6.44325	6.33609	5.96114	6.62994	5.86322	6.35547
Psen1	19164	Ad3h|PS-1|PS1|S182	presenilin 1	9.59552	9.77752	9.868	9.66039	9.83754	9.85967	9.5507	9.82014
Psen2	19165	ALG-3|Ad4h|Alg3|PS-2|PS2|Psnl2|STM2	presenilin 2	4.37056	3.62102	3.81876	3.57528	4.19561	4.50065	3.75888	4.21412
Psma2	19166	Lmpc3	proteasome (prosome, macropain) subunit, alpha type 2	12.4799	12.5858	12.6451	12.6745	12.3582	12.4316	12.2163	12.3266
Psmb10	19171	Mecl-1|Mecl1	proteasome (prosome, macropain) subunit, beta type 10	7.0121	7.99799	8.45296	7.95225	7.33311	8.71335	7.20514	7.9532
Psmb7	19177	AU020723|MC14	proteasome (prosome, macropain) subunit, beta type 7	11.5576	11.6492	11.6812	11.6867	11.9007	11.8797	11.812	11.9749
Ptgs2	19225	COX2|Cox-2|PES-2|PGHS-2|PHS II|PHS-2|Pghs2|TIS10|gripghs	prostaglandin-endoperoxide synthase 2	14.0469	12.3189	12.9267	12.1884	12.5831	12.1645	12.4478	11.4979
Ptprc	19264	B220|CD45R|Cd45|L-CA|Ly-5|Lyt-4|T200|loc	protein tyrosine phosphatase, receptor type, C	5.11902	2.25845	2.45619	1.99032	3.45864	3.37512	3.02192	3.44858
Pvrl2	19294	AI325026|AI987993|Cd112|MPH|Pvr|Pvs|nectin-2|Nectin2	poliovirus receptor-related 2	7.82473	8.44827	8.78583	8.28187	9.24582	9.94774	8.8548	9.35307
Raet1a	19368	RAE-1alpha|Rae1alpha|Raet1|Raet1d	retinoic acid early transcript 1, alpha	7.30413	9.58936	10.5899	9.50602	8.00296	8.6196	7.92881	8.33611
Rag1	19373	Rag-1	recombination activating gene 1	0.7267	1.03605	1.2338	0.405358	1.28872	1.91569	2.43695	0.126656
Rel	19696	c-Rel	reticuloendotheliosis oncogene	8.47489	8.51449	8.24129	8.28187	8.19561	8.18248	8.22486	8.34582
Rela	19697	p65	v-rel reticuloendotheliosis viral oncogene homolog A (avian)	9.57376	9.57263	9.6712	9.50339	9.79849	9.75332	9.48135	9.66969
Relb	19698	shep	avian reticuloendotheliosis viral (v-rel) oncogene related B	8.52436	9.35648	9.64742	9.34787	9.85477	10.2929	9.48952	9.99239
Reps1	19707	BB161292	RalBP1 associated Eps domain containing protein	9.94223	10.3145	10.246	10.1502	10.0864	10.1941	9.74301	9.98619
Mst1r	19882	CD136|CDw136|Fv-2|Fv2|PTK8|Ron|STK	macrophage stimulating 1 receptor (c-met-related tyrosine kinase)	2.7267	1.45109	0.648834	0.405358	1.28872	2.91569	2.02192	1.71162
Rora	19883	9530021D13Rik|Nr1f1|ROR1|ROR2|ROR3|nmf267|sg|staggerer|tmgc26	RAR-related orphan receptor alpha	3.97463	3.62102	3.97076	3.57528	3.74815	2.91569	3.89638	2.71162
Rorc	19885	Nr1f3|RORgamma|TOR|Thor	RAR-related orphan receptor gamma	3.04863	4.03605	5.55572	4.65329	5.53664	6.85821	4.13739	6.66581
Rps6	20104	S6R	ribosomal protein S6	9.83784	10.0047	9.77296	9.93869	10.12	9.60918	9.95855	9.7003
S100a8	20201	60B8Ag|AI323541|B8Ag|CFAg|CP-10|Caga|MRP8|p8	S100 calcium binding protein A8 (calgranulin A)	3.7267	3.53855	4.10827	3.99032	3.74815	4.00315	4.34384	3.58609
S100b	20203	AI850290|Bpb	S100 protein, beta polypeptide, neural	2.7267	2.25845	2.81876	1.40536	1.87368	3.37512	2.75888	1.71162
Saa1	20208	Saa-1|Saa2	serum amyloid A 1	2.04863	1.77302	3.2338	2.72729	1.87368	2.72305	3.60688	2.12666
Msr1	20288	MRS-A|MSR|MSR-A|SR-AI|SR-AII|Scara1|Scvr	macrophage scavenger receptor 1	4.04863	2.62102	1.97076	2.40536	1.87368	2.23762	2.43695	2.71162
Ccl1	20290	BF534335|I-309|Scya1|Tca-3	chemokine (C-C motif) ligand 1	3.81416	3.69902	3.45619	2.72729	3.09607	3.08562	3.75888	2.44858
Ccl11	20292	Scya11|eotaxin	chemokine (C-C motif) ligand 11	3.53405	3.15153	2.45619	3.21271	3.28872	2.91569	3.60688	3.12666
Ccl12	20293	MCP-5|Scya12	chemokine (C-C motif) ligand 12	1.7267	0.451091	-0.351166	1.99032	0.288717	2.50065	2.02192	0.126656
Ccl17	20295	Abcd-2|Scya17|Scya17l|Tarc	chemokine (C-C motif) ligand 17	3.7267	3.97465	4.2338	4.21271	4.09607	3.91569	3.02192	4.12666
Ccl2	20296	AI323594|HC11|JE|MCAF|MCP-1|MCP1|SMC-CF|Scya2|Sigje	chemokine (C-C motif) ligand 2	5.6809	9.61725	9.65446	9.58028	8.18353	8.40353	5.48135	7.77771
Ccl20	20297	CKb4|LARC|MIP-3A|MIP-3[a]|MIP3A|ST38|Scya20|exodus-1	chemokine (C-C motif) ligand 20	2.04863	2.25845	2.64883	0.405358	3.74815	3.23762	2.75888	1.71162
Ccl22	20299	ABCD-1|DCBCK|MDC|Scya22	chemokine (C-C motif) ligand 22	2.89662	3.15153	3.45619	3.72729	3.09607	2.91569	3.75888	3.71162
Ccl25	20300	A130072A22Rik|AI852536|CKb15|Scya25|TECK	chemokine (C-C motif) ligand 25	7.18613	7.19928	7.3903	6.92892	6.85857	7.21947	6.43695	6.8409
Ccl27a	20301	ALP|AW558992|CTACK|CTAK|Ccl27|ESkine|ILC|PESKY|Scya27|Scya27a	chemokine (C-C motif) ligand 27A	4.04863	4.20598	4.77812	4.99032	5.24291	5.61613	4.75888	5.55292
Ccl3	20302	AI323804|G0S19-1|LD78alpha|MIP-1alpha|MIP1-(a)|MIP1-alpha|Mip1a|Scya3	chemokine (C-C motif) ligand 3	2.7267	2.62102	1.97076	2.99032	2.87368	2.91569	3.02192	2.71162
Ccl4	20303	AT744.1|Act-2|MIP-1B|Mip1b|Scya4	chemokine (C-C motif) ligand 4	2.89662	1.45109	2.45619	1.99032	2.61064	2.91569	3.24431	2.44858
Ccl5	20304	MuRantes|RANTES|SISd|Scya5|TCP228	chemokine (C-C motif) ligand 5	6.59706	8.17901	9.42527	8.22554	8.28307	10.3761	7.5765	8.68508
Ccl6	20305	MRP-1|Scya6|c10	chemokine (C-C motif) ligand 6	4.04863	3.03605	3.2338	1.99032	3.28872	3.91569	0.436953	3.71162
Ccl7	20306	MCP-3|Scya7|fic|marc|mcp3	chemokine (C-C motif) ligand 7	5.45462	7.1093	6.49432	7.1196	3.74815	4.55955	2.43695	3.44858
Ccl8	20307	1810063B20Rik|AB023418|HC14|MCP-2|Mcp2|Scya8	chemokine (C-C motif) ligand 8	5.31166	4.25845	3.2338	3.99032	0.288717	2.91569	3.02192	2.71162
Ccl9	20308	CCF18|MRP-2|Scya10|Scya9	chemokine (C-C motif) ligand 9	7.30413	7.97857	7.74159	7.65329	7.5461	6.14451	7.1512	6.77051
Cxcl15	20309	Il8|Scyb15|lungkine|weche	chemokine (C-X-C motif) ligand 15	2.53405	0.451091	1.97076	2.72729	1.87368	3.82258	3.24431	3.12666
Cxcl2	20310	CINC-2a|GROb|Gro2|MIP-2|MIP-2a|Mgsa-b|Mip2|Scyb|Scyb2	chemokine (C-X-C motif) ligand 2	2.31166	2.03605	1.2338	2.40536	2.87368	2.23762	3.02192	2.71162
Cxcl5	20311	AMCF-II|ENA-78|GCP-2|LIX|Scyb5|Scyb6	chemokine (C-X-C motif) ligand 5	11.388	11.1837	10.7909	10.8709	9.62634	8.49312	9.71075	8.51036
Cx3cl1	20312	AB030188|ABCD-3|AI848747|CX3C|Cxc3|D8Bwg0439e|Scyd1	chemokine (C-X3-C motif) ligand 1	5.11902	6.00568	6.5677	5.83162	5.57412	6.20109	4.82927	5.79908
Cxcl12	20315	Pbsf|Scyb12|Sdf1|Tlsf|Tpar1	chemokine (C-X-C motif) ligand 12	10.7344	10.2576	9.2617	9.96951	11.3208	11.1061	11.2491	10.9651
Sele	20339	CD62E|E-selectin|ELAM-1|Elam|LECAM2	selectin, endothelial cell	3.31166	2.03605	1.64883	1.99032	2.28872	2.50065	2.02192	2.44858
Sell	20343	AI528707|CD62L|L-selectin|LECAM-1|Lnhr|Ly-22|Ly-m22|Lyam-1|Lyam1	selectin, lymphocyte	3.42714	3.35798	3.34927	3.40536	1.87368	2.50065	3.60688	2.44858
Selplg	20345	CD162|Psgl-1|Psgl1|Selp1|Selpl	selectin, platelet (p-selectin) ligand	2.53405	1.77302	-0.351166	1.99032	1.87368	1.91569	2.75888	0.126656
Foxp3	20371	JM2|scurfin|sf	forkhead box P3	2.31166	2.03605	1.2338	1.40536	3.74815	2.72305	2.43695	2.12666
Sh2d1a	20400	Gm686|SAP	SH2 domain containing 1A	2.04863	1.45109	1.97076	3.40536	2.28872	2.23762	2.02192	2.12666
St6gal1	20440	AW742324|Siat1|St6Gal-I|St6gal|St6galI	beta galactoside alpha 2,6 sialyltransferase 1	7.57845	7.95492	8.38693	7.47145	8.00296	9.28856	7.02192	8.61851
Smn1	20595	AI849087|Gemin1|Smn	survival motor neuron 1	10.5429	10.7679	10.7423	10.7419	10.5637	10.3638	10.6006	10.2404
Siglec1	20612	Cd169|Siglec-1|Sn	sialic acid binding Ig-like lectin 1, sialoadhesin	1.31166	1.45109	-0.351166	1.99032	0.288717	2.23762	2.75888	2.12666
Snai1	20613	AI194338|Sna|Sna1|Snail|Snail1	snail family zinc finger 1	2.53405	4.15153	3.97076	4.92892	1.87368	2.72305	3.24431	2.93401
Spn	20737	A630014B01Rik|Cd43|Galgp|Ly-48|Ly48	sialophorin	6.10174	7.45672	7.6712	7.34787	6.17136	6.60219	5.08081	6.2764
Spp1	20750	2AR|Apl-1|BNSP|BSPI|Bsp|ETA-1|Eta|OP|Opn|Opnl|Ric|Spp-1	secreted phosphoprotein 1	14.6324	15.3777	16.2097	15.1768	14.2763	14.9377	13.8746	14.4504
Stat1	20846	2010005J02Rik|AA408197	signal transducer and activator of transcription 1	9.80352	9.74111	10.8771	9.60257	9.59706	12.2622	9.20182	10.8201
Stat2	20847	1600010G07Rik|AW496480	signal transducer and activator of transcription 2	7.00282	6.98247	8.32126	6.79768	6.49817	9.92692	6.66577	8.81665
Stat3	20848	1110034C02Rik|AW109958|Aprf	signal transducer and activator of transcription 3	9.89913	10.0547	10.3869	9.99407	10.1911	10.7446	9.83783	10.5286
Stat4	20849	-	signal transducer and activator of transcription 4	1.31166	3.15153	2.45619	1.40536	2.28872	2.91569	2.75888	2.12666
Stat5b	20851	-	signal transducer and activator of transcription 5B	8.75184	8.53855	8.61173	8.54491	8.63744	8.97097	8.26984	8.61851
Stat6	20852	-	signal transducer and activator of transcription 6	10.6655	10.8108	10.9937	10.875	11.0336	11.1098	10.9268	11.0888
Syk	20963	Sykb	spleen tyrosine kinase	5.53405	3.25845	2.97076	3.86479	3.87368	3.50065	3.02192	4.21412
Tal1	21349	SCL/tal-1|Scl|bHLHa17|tal-1	T cell acute lymphocytic leukemia 1	3.18613	3.45109	3.81876	1.99032	3.28872	2.23762	2.75888	3.44858
Tank	21353	C86182|E430026L09Rik|I-TRAF	TRAF family member-associated Nf-kappa B activator	9.33033	9.29501	9.24129	9.23508	9.90159	10.4626	9.40562	9.91129
Tap1	21354	ABC17|APT1|Abcb2|Ham-1|Ham1|MTP1|PSF1|RING4|TAP|Tap-1|Y3	transporter 1, ATP-binding cassette, sub-family B (MDR/TAP)	8.59398	9.05842	9.47697	8.88514	8.39724	9.78914	8.23137	8.77411
Tap2	21355	ABC18|AI462429|APT2|Abcb3|Ham-2|Ham2|MTP2|PSF2|RING11|Tap-2|Y1|jas	transporter 2, ATP-binding cassette, sub-family B (MDR/TAP)	8.45802	8.49821	8.97975	8.58527	8.93618	9.46836	8.49765	9.22469
Tapbp	21356	D17Wsu91e|TPN	TAP binding protein	9.34509	10.4067	10.6396	10.2865	9.77455	11.1055	9.42847	10.4086
Tcf7	21414	AI465550|TCF-1|Tcf1	transcription factor 7, T cell specific	7.13609	8.43123	8.55873	8.33017	7.92534	8.37102	7.70374	7.59426
Tfeb	21425	Tcfeb|bHLHe35	transcription factor EB	7.28894	7.49001	7.62611	7.47145	11.8586	11.9851	11.2918	11.8932
Tek	21687	AA517024|Cd202b|Hyk|STK1|Tie-2|Tie2	endothelial-specific receptor tyrosine kinase	2.53405	2.62102	2.64883	1.99032	3.28872	3.37512	0.436953	3.93401
Tgfb1	21803	TGF-beta1|TGFbeta1|Tgfb|Tgfb-1	transforming growth factor, beta 1	8.28894	9.9339	10.3699	9.89921	8.46863	9.1421	8.07358	8.86137
Tgfb2	21808	BB105277|Tgf-beta2|Tgfb-2	transforming growth factor, beta 2	5.11902	3.62102	3.64883	4.21271	5.24291	6.54505	4.89638	5.98464
Tgfb3	21809	TGF-beta-3|Tgfb-3	transforming growth factor, beta 3	9.31541	9.09855	9.59574	8.94063	8.82788	9.50065	8.84209	9.45757
Tgfbr1	21812	ALK5|AU017191|Alk-5|ESK2|TGFR-1|TbetaR-I|TbetaRI	transforming growth factor, beta receptor I	8.70398	8.60084	8.80618	8.53464	9.1498	9.34614	8.84209	9.16008
Tgfbr2	21813	1110020H15Rik|AU042018|DNIIR|RIIDN|TBR-II|TbetaR-II|TbetaRII	transforming growth factor, beta receptor II	11.5698	11.6223	11.5994	11.2006	11.5205	11.371	11.2619	11.3555
Thbd	21824	AI385582|CD141|TM	thrombomodulin	3.18613	2.77302	3.55572	1.99032	2.87368	3.08562	3.75888	3.12666
Thbs1	21825	TSP-1|TSP1|Thbs-1|tbsp1	thrombospondin 1	13.6352	13.171	12.9655	12.5391	13.7935	13.0908	13.3915	13.3582
Thy1	21838	CD90|T25|Thy-1|Thy-1.2|Thy1.1|Thy1.2	thymus cell antigen 1, theta	2.53405	1.03605	2.2338	3.40536	3.09607	2.72305	3.60688	3.44858
Tie1	21846	D430008P04Rik|TIE|tie-1	tyrosine kinase with immunoglobulin-like and EGF-like domains 1	2.31166	0.451091	2.2338	2.40536	1.28872	3.08562	2.02192	2.93401
Tlr1	21897	-	toll-like receptor 1	6.89662	5.40529	5.32126	4.72729	6.53664	6.93806	6.41423	6.60239
Tlr4	21898	Lps|Ly87|Ran/M1|Rasl2-8	toll-like receptor 4	8.62455	8.87105	9.35964	8.7137	9.12792	9.53957	8.39695	9.29156
Tlr6	21899	-	toll-like receptor 6	8.17378	8.06948	7.96625	7.71824	7.93977	8.1541	7.65612	7.9784
Tnf	21926	DIF|TNF-a|TNF-alpha|TNFSF2|TNFalpha|Tnfa|Tnfsf1a	tumor necrosis factor	2.31166	2.91052	2.2338	2.40536	2.87368	2.23762	2.75888	2.44858
Tnfaip3	21929	A20|Tnfip3	tumor necrosis factor, alpha-induced protein 3	8.50806	8.93087	8.39367	8.30018	8.67242	9.51002	8.54548	8.89153
Tnfrsf10b	21933	DR5|KILLER|Ly98|MK|TRAILR2|TRICK2A|TRICK2B|TRICKB	tumor necrosis factor receptor superfamily, member 10b	8.9651	9.7503	9.85096	9.56018	9.51754	9.52672	9.34685	9.44407
Tnfrsf11a	21934	Ly109|ODFR|OFE|Rank|TRANCE-R|mRANK	tumor necrosis factor receptor superfamily, member 11a, NFKB activator	5.18613	3.77302	3.64883	4.21271	4.93257	5.16362	5.13739	5.03355
Tnfrsf17	21935	BCM|BCMA|Tnfrsf13|Tnfrsf13a	tumor necrosis factor receptor superfamily, member 17	0.7267	1.45109	2.97076	2.40536	3.09607	2.23762	1.43695	0.126656
Tnfrsf18	21936	AITR|Gitr	tumor necrosis factor receptor superfamily, member 18	-0.2733	0.451091	-0.351166	1.99032	1.28872	1.50065	1.43695	2.12666
Tnfrsf1a	21937	CD120a|FPF|TNF-R|TNF-R-I|TNF-R1|TNF-R55|TNF-alphaR1|TNFAR|TNFR60|TNFRI|TNFRp55|TNFalpha-R1|Tnfr-2|Tnfr1|p55|p55-R	tumor necrosis factor receptor superfamily, member 1a	10.3313	10.2745	10.4998	10.1652	10.3682	10.6342	10.1918	10.5028
Tnfrsf1b	21938	CD120b|TNF-R-II|TNF-R2|TNF-R75|TNF-alphaR2|TNFBR|TNFR80|TNFRII|TNFalpha-R2|Tnfr-1|Tnfr2|p75	tumor necrosis factor receptor superfamily, member 1b	3.97463	4.20598	5.14069	4.49282	5.19561	4.30801	3.60688	4.98464
Cd40	21939	AI326936|Bp50|GP39|HIGM1|IGM|IMD3|T-BAM|TRAP|Tnfrsf5|p50	CD40 antigen	1.31166	1.77302	1.97076	1.40536	3.28872	1.91569	2.75888	2.12666
Cd27	21940	S152|Tnfrsf7|Tp55	CD27 antigen	2.31166	2.25845	0.648834	0.405358	2.28872	3.08562	2.43695	2.12666
Tnfrsf8	21941	Cd30|D1S166E|Ki|Ki-1	tumor necrosis factor receptor superfamily, member 8	1.31166	0.451091	3.45619	3.21271	3.09607	3.37512	1.43695	1.71162
Tnfrsf9	21942	4-1BB|A930040I11Rik|AA408498|AI325004|CDw137|Cd137|ILA|Ly63	tumor necrosis factor receptor superfamily, member 9	5.65744	6.35798	6.64883	6.18672	6.5555	6.74858	5.82927	6.21412
Tnfsf11	21943	Ly109l|ODF|OPG|OPGL|RANKL|Trance	tumor necrosis factor (ligand) superfamily, member 11	2.89662	1.77302	1.97076	2.72729	1.87368	2.72305	2.75888	3.12666
Tnfsf12	21944	Apo3l|Dr3l|Dr3lg|Tweak	tumor necrosis factor (ligand) superfamily, member 12	2.89662	2.25845	1.97076	2.72729	1.28872	2.50065	4.24431	3.29658
Cd40lg	21947	CD154|CD40-L|Cd40l|HIGM1|IGM|IMD3|Ly-62|Ly62|T-BAM|TRAP|Tnfsf5|gp39	CD40 ligand	2.89662	2.91052	2.64883	3.21271	3.28872	3.50065	4.82927	4.29658
Cd70	21948	CD27LG|Cd27l|Tnfsf7	CD70 antigen	2.53405	3.15153	3.45619	2.99032	2.87368	2.72305	3.75888	3.93401
Tnfsf8	21949	CD153|CD30LG|Cd30l	tumor necrosis factor (ligand) superfamily, member 8	1.31166	2.45109	2.64883	2.99032	2.28872	2.91569	1.43695	2.71162
Traf2	22030	AI325259	TNF receptor-associated factor 2	9.41495	9.46929	9.58694	9.70685	9.86047	10.1918	9.69434	9.88321
Traf3	22031	AI528849|CAP-1|CD40bp|CRAF1|LAP1|T-BAM|amn	TNF receptor-associated factor 3	8.50478	8.22588	7.97076	7.95225	8.72751	8.62994	8.68013	8.60239
Traf6	22034	2310003F17Rik|AI851288|C630032O20Rik	TNF receptor-associated factor 6	8.35969	8.40819	8.34927	8.288	9.00296	8.94636	8.56624	8.6145
Tnfsf10	22035	A330042I21Rik|AI448571|APO-2L|Ly81|TL2|Trail	tumor necrosis factor (ligand) superfamily, member 10	2.31166	3.25845	4.1724	3.21271	4.19561	7.59517	4.13739	5.58609
Tfrc	22042	2610028K12Rik|AI195355|AI426448|AU015758|CD71|E430033M20Rik|Mtvr-1|Mtvr1|TFR|TFR1|TR|Trfr|p90	transferrin receptor	12.9049	13.1818	12.983	12.8849	13.1826	12.8946	13.16	12.8573
Trp53	22059	Tp53|bbl|bfy|bhy|p44|p53	transformation related protein 53	9.80885	9.99991	10.0162	9.86068	10.1232	10.0578	9.97223	10.1011
Twist1	22160	AA960487|M-Twist|Pde|Ska10|Ska<m10Jus>|Twist|bHLHa38|pdt	twist basic helix-loop-helix transcription factor 1	9.57376	9.67389	9.77166	9.60011	9.51272	10.1801	9.56366	9.6889
Tnfrsf4	22163	ACT35|CD134|Ly-70|Ox40|TXGP1L|Txgp1	tumor necrosis factor receptor superfamily, member 4	3.42714	3.84341	1.97076	3.40536	3.45864	2.91569	4.13739	3.44858
Tnfsf4	22164	Ath-1|Ath1|CD134L|OX-40L|Ox40l|TXGP1|Txgp1l|gp34	tumor necrosis factor (ligand) superfamily, member 4	2.04863	2.25845	2.2338	1.40536	1.87368	1.50065	2.02192	2.12666
Txk	22165	A130089B16Rik|Btkl|PTK-RL-18|PTK4|Rlk	TXK tyrosine kinase	2.53405	3.45109	2.64883	2.99032	2.61064	2.72305	2.75888	3.58609
Cmpk2	22169	1200004E04Rik|TDKI|Tyki	cytidine monophosphate (UMP-CMP) kinase 2, mitochondrial	5.79279	6.36995	8.84113	6.13328	7.44859	10.8082	6.43695	8.87149
Ubc	22190	2700054O04Rik|AI194771|Rps27a|TI-225|Uba52|Ubb	ubiquitin C	14.0203	14.1049	14.5972	14.1944	14.4998	14.6256	13.7701	14.2835
Vcam1	22329	CD106|Vcam-1	vascular cell adhesion molecule 1	3.31166	2.91052	4.69323	4.49282	4.28872	6.20109	4.43695	5.48421
Vegfa	22339	Vegf|Vpf	vascular endothelial growth factor A	10.2305	9.8805	10.3553	10.0546	11.966	12.5521	9.97611	12.0699
Vegfc	22341	AW228853|VEGF-C	vascular endothelial growth factor C	10.4366	10.5077	10.3716	10.6627	9.08313	8.92412	9.5867	8.65022
Vhl	22346	Vhlh	von Hippel-Lindau tumor suppressor	6.71538	6.47346	6.98868	6.26334	6.90343	7.03463	6.54548	6.8409
Vim	22352	-	vimentin	16.138	16.2639	16.0637	16.2164	16.4321	15.8379	16.4262	16.0937
Vwf	22371	6820430P06Rik|AI551257|B130011O06Rik|C630030D09|F8VWF|VWD	Von Willebrand factor homolog	2.31166	1.45109	2.45619	2.72729	2.61064	4.61613	4.02192	2.44858
Xbp1	22433	D11Ertd39e|TREB-5|TREB5|XBP-1	X-box binding protein 1	11.1696	10.7307	11.1914	10.9397	10.3642	11.0262	10.6081	10.8698
Yy1	22632	AW488674|NF-E1	YY1 transcription factor	11.2615	10.7266	10.7243	10.7239	11.1161	11.1427	11.3158	11.2319
Zap70	22637	Srk|ZAP-70|mrtle|mur	zeta-chain (TCR) associated protein kinase	2.04863	2.77302	1.64883	1.99032	2.61064	2.23762	1.43695	2.71162
Zfp13	22654	4933429B21|AI835008|Krox-8|Rhit|Zfp-13	zinc finger protein 13	6.38491	5.79094	5.89676	5.95995	6.07008	6.74858	6.34384	6.37458
Ikzf1	22778	5832432G11Rik|Ikaros|LyF-1|Zfpn1a1|Znfn1a1|hlk-1|mKIAA4227	IKAROS family zinc finger 1	3.42714	1.77302	1.97076	2.72729	2.28872	2.50065	2.43695	3.44858
Ikzf2	22779	A730095J18Rik|Helios|Zfpn1a2|Znfn1a2	IKAROS family zinc finger 2	5.93615	5.66054	5.14069	5.31225	4.81228	6.5304	5.34384	5.85458
Akt3	23797	AI851531|D930002M15Rik|Nmf350	thymoma viral proto-oncogene 3	9.58623	9.22588	9.59428	9.16358	9.47111	10.2274	9.09159	9.85458
Xcr1	23832	Ccxcr1|Gpr5|mXcr1	chemokine (C motif) receptor 1	2.89662	2.77302	2.45619	2.72729	1.28872	1.50065	2.43695	3.12666
Clec5a	23845	Clecsf5|Ly100|MDL-1|Mdl1	C-type lectin domain family 5, member a	1.7267	2.45109	1.97076	2.72729	0.288717	0.915692	2.02192	2.93401
Ets1	23871	AI196000|AI448617|D230050P06|Ets-1|Tpl1	E26 avian leukemia oncogene 1, 5' domain	11.5429	11.158	11.0449	11.0528	12.0552	12.2297	11.6305	12.091
Hcst	23900	DAP10|KAP10	hematopoietic cell signal transducer	3.42714	3.45109	2.81876	1.40536	4.19561	3.91569	2.43695	3.29658
Sh2b2	23921	Aps	SH2B adaptor protein 2	5.7267	6.97465	7.09178	7.30018	5.68103	6.04497	5.68488	5.58609
Nt5e	23959	2210401F01Rik|AI447961|CD73|NT|Nt5|eNT	5' nucleotidase, ecto	7.61544	8.31218	9.61173	8.74075	6.69811	7.18248	7.25713	7.28653
Pin1	23988	0610025L01Rik|D9Bwg1161e	protein (peptidyl-prolyl cis/trans isomerase) NIMA-interacting 1	6.29656	6.61096	5.91562	6.5551	6.33311	6.18248	6.10938	6.39344
Ccl19	24047	CKb11|ELC|MIP3B|Scya19|exodus-3	chemokine (C-C motif) ligand 19	1.7267	1.77302	1.2338	0.405358	1.87368	0.915692	1.43695	0.126656
Sigirr	24058	AI256711|TIR8	single immunoglobulin and toll-interleukin 1 receptor (TIR) domain	2.31166	4.97465	6.02387	5.31225	2.61064	4.00315	3.43695	3.58609
Tlr2	24088	Ly105	toll-like receptor 2	7.54048	8.25522	8.75474	8.35372	8.59706	9.48365	7.82066	9.22469
Tnfsf13b	24099	BAFF|BLyS|D8Ertd387e|TALL-1|TALL1|THANK|TNFSF20|zTNF4	tumor necrosis factor (ligand) superfamily, member 13b	-0.2733	1.77302	1.97076	2.40536	2.87368	-0.0843081	2.02192	2.93401
Usp18	24110	1110058H21Rik|AW047653|UBP43|Ubp15	ubiquitin specific peptidase 18	3.7267	4.03605	7.22626	4.40536	5.0436	9.76431	3.75888	7.53605
Axl	26362	AI323647|Ark|Tyro7|Ufo	AXL receptor tyrosine kinase	13.1625	13.0288	12.8819	12.9206	13.4157	13.4911	13.3864	13.2878
Adgre5	26364	AA409984|Cd97|TM7LN1	adhesion G protein-coupled receptor E5	3.31166	2.45109	2.45619	2.99032	2.28872	1.50065	4.43695	3.71162
Ceacam1	26365	Bgp|Bgp1|C-CAM|CD66a|Cc1|Cea-1|Cea-7|Cea1|Cea7|Hv-2|Hv2|MHVR|MHVR1|Mhv-1|bb-1|mCEA1|mmCGM1|mmCGM1a|mmCGM2	carcinoembryonic antigen-related cell adhesion molecule 1	3.42714	3.15153	3.81876	1.99032	4.19561	5.61613	2.75888	4.88154
Map2k1	26395	MAPKK1|MEKK1|Mek1|Prkmk1	mitogen-activated protein kinase kinase 1	10.9495	10.5057	10.6677	10.4955	10.8661	11.2511	10.826	10.8563
Map2k2	26396	AA589381|MEK2|MK2|Prkmk2	mitogen-activated protein kinase kinase 2	11.3013	11.1301	11.3182	11.2555	11.0717	11.1409	10.8705	11.1039
Map2k4	26398	JNKK1|MEK4|MKK4|PRKMK4|Sek1|Serk1	mitogen-activated protein kinase kinase 4	9.90909	10.1841	10.1576	10.0848	10.2631	10.343	9.9348	10.1393
Map3k1	26401	MAPKKK1|MEKK1|Mekk	mitogen-activated protein kinase kinase kinase 1	7.25026	7.03605	6.81876	6.72729	6.81228	7.72947	7.39115	7.43044
Map3k5	26408	7420452D20Rik|ASK|ASK1|MAPKKK5|Mekk5	mitogen-activated protein kinase kinase kinase 5	7.31166	7.52255	8.03254	7.64376	5.418	6.14451	5.64641	5.58609
Map3k7	26409	B430101B05|C87327|Tak1	mitogen-activated protein kinase kinase kinase 7	10.0985	10.1833	10.0887	9.97331	10.4872	10.5396	10.298	10.4963
Map4k2	26412	AI385662|BL44|GCK|Rab8ip	mitogen-activated protein kinase kinase kinase kinase 2	7.63359	7.67509	8.12051	7.66275	8.09607	8.24212	7.5765	8.2456
Mapk1	26413	9030612K14Rik|AA407128|AU018647|C78273|ERK|Erk2|MAPK2|PRKM2|Prkm1|p41mapk|p42mapk	mitogen-activated protein kinase 1	11.5858	11.2856	11.3545	11.2453	11.1326	11.276	10.9887	11.1874
Mapk14	26416	CSBP2|Crk1|Csbp1|Mxi2|PRKM14|PRKM15|p38|p38-alpha|p38MAPK|p38a|p38alpha	mitogen-activated protein kinase 14	10.5706	10.37	10.2366	10.342	10.6084	10.6504	10.5842	10.5963
Mapk3	26417	Erk-1|Erk1|Ert2|Esrk1|Mnk1|Mtap2k|Prkm3|p44|p44erk1|p44mapk	mitogen-activated protein kinase 3	10.4538	10.3368	10.8522	10.6306	10.7553	11.2494	10.535	11.2068
Mapk8	26419	AI849689|JNK|JNK1|Prkm8|SAPK1	mitogen-activated protein kinase 8	8.35241	8.37887	8.42032	8.33609	8.43338	8.90153	7.9992	8.49734
Slc7a11	26570	9930009M05Rik|AI451155|sut|xCT	solute carrier family 7 (cationic amino acid transporter, y+ system), member 11	5.91652	6.52791	7.5972	6.89721	6.73166	7.14451	6.24431	6.95955
Clec4a2	26888	Clec4a|Clecsf6|DCIR|Dcir1	C-type lectin domain family 4, member a2	2.53405	3.25845	2.81876	2.99032	2.61064	1.91569	2.75888	2.12666
Sh2d1b1	26904	EAT-2|EAT-2A|Eat2|Eat2a|Sh2d1b	SH2 domain containing 1B1	2.89662	3.53855	3.7363	3.40536	3.61064	3.23762	4.02192	3.93401
Ecsit	26940	Sitpec	ECSIT homolog (Drosophila)	7.97937	7.80864	7.90622	7.70914	7.42827	7.60219	7.69434	7.76328
Klrk1	27007	D6H12S2489E|NKG2-D|Nkg2d	killer cell lectin-like receptor subfamily K, member 1	3.63359	1.03605	2.2338	1.99032	2.61064	2.23762	3.60688	3.71162
Irf5	27056	AW491843|mirf5	interferon regulatory factor 5	3.53405	3.77302	4.2338	3.86479	4.19561	5.89297	4.24431	4.77051
Slamf1	27218	4933415F16|AA177906|CD150|CDw150|ESTM51|IPO-3|Slam	signaling lymphocytic activation molecule family member 1	1.7267	1.77302	-0.351166	1.99032	2.28872	1.91569	0.436953	3.29658
Tnfrsf12a	27279	AI255180|C87282|Fn14|HPIP|TWEAK-R|TweakR	tumor necrosis factor receptor superfamily, member 12a	12.5244	12.4384	12.7129	12.3317	13.4326	13.2186	12.6069	13.0756
Klra15	27423	Ly49O	killer cell lectin-like receptor, subfamily A, member 15	2.31166	2.62102	1.64883	0.405358	1.28872	2.23762	3.02192	2.44858
Slamf6	30925	KAL1|KAL1b|Ly108|NTB-A|NTBA|SF2000	SLAM family member 6	0.7267	0.451091	2.45619	1.40536	1.87368	1.50065	0.436953	2.93401
Pik3cg	30955	5830428L06Rik|PI3Kgamma|p110gamma	phosphoinositide-3-kinase, catalytic, gamma polypeptide	2.04863	1.77302	2.2338	2.40536	1.87368	0.915692	0.436953	2.71162
Ebi3	50498	EBI-3|IL-27	Epstein-Barr virus induced gene 3	1.31166	1.77302	-0.351166	1.99032	2.28872	2.72305	1.43695	2.12666
Elane	50701	Ela2|F430011M15Rik|NE	elastase, neutrophil expressed	1.31166	1.45109	2.45619	2.72729	0.288717	-0.0843081	3.75888	1.71162
Icosl	50723	AU044799|B7-H2|B7RP-1|B7h|BG071784|GI50|GL50|GL50-B|ICOS-L|Icoslg|LICOS|Ly115l|mKIAA0653	icos ligand	3.42714	3.62102	3.64883	3.72729	2.28872	1.91569	2.02192	2.93401
Il17rb	50905	Evi27|IL-17ER|IL-17Rh1|IL17RH1|Il17br	interleukin 17 receptor B	3.53405	2.03605	2.97076	2.99032	3.09607	1.91569	3.60688	3.58609
C1s1	50908	AA959438|AI255193|AI327365|C1s|C1sa	complement component 1, s subcomponent 1	7.08425	6.79094	7.0751	6.18672	6.07008	8.26442	5.02192	6.99702
C1ra	50909	AI132558|C1r|mC1rA	complement component 1, r subcomponent A	8.74072	7.49001	7.97975	7.37114	7.72334	9.32932	7.56624	8.52326
Klrg1	50928	2F1-Ag|MAFA|MAFA-L	killer cell lectin-like receptor subfamily G, member 1	3.42714	2.03605	2.97076	3.57528	2.61064	3.23762	2.43695	2.93401
Il22	50929	IL-22|IL-22a|ILTIFa|Iltif	interleukin 22	2.31166	3.25845	3.2338	2.72729	1.87368	1.91569	2.75888	2.71162
Tnfsf14	50930	HVEM-L|HVEML|LIGHT|LTg|Ly113	tumor necrosis factor (ligand) superfamily, member 14	2.53405	2.91052	1.97076	2.72729	2.87368	2.23762	3.43695	3.58609
Pvr	52118	3830421F03Rik|CD155|D7Ertd458e|HVED|PVS|Taa1|Tage4|mE4|necl-5	poliovirus receptor	9.37236	9.18918	9.63752	9.23508	11.3097	11.1203	10.1058	10.9627
Ifi27	52668	1110013J02Rik|2900026P10Rik|D12Ertd647e|ISG12a|Ifi27l1	interferon, alpha-inducible protein 27	10.3982	10.0105	10.9302	9.87906	10.4699	11.9878	9.8357	11.5587
Batf	53314	B-ATF|SFA-2	basic leucine zipper transcription factor, ATF-like	3.31166	4.40529	5.14069	4.99032	5.28872	5.34196	5.24431	4.98464
Pla2g6	53357	BB112799|PNPLA9|iPLA(2)beta|iPLA2|iPLA2beta	phospholipase A2, group VI	7.99349	8.5983	8.73895	8.58527	8.08962	8.35448	8.059	8.19275
Cd164	53599	A115|A24|AA589639|AW540279|MGC-24|MSSP	CD164 antigen	11.8201	11.8119	11.8719	11.642	11.5265	11.9273	11.2777	11.6851
Tlr5	53791	-	toll-like receptor 5	5.0121	4.03605	4.1724	4.21271	5.0436	4.86989	4.75888	4.21412
Irf7	54123	-	interferon regulatory factor 7	3.18613	4.40529	7.7203	4.49282	4.28872	9.37102	3.75888	7.38404
Irf3	54131	C920001K05Rik|IRF-3	interferon regulatory factor 3	8.89412	9.08045	9.25616	9.3272	8.60613	9.43336	9.10229	9.17922
Icos	54167	AILIM|CCLP|CRP-1|H4|Ly115	inducible T cell co-stimulator	2.04863	2.45109	2.45619	2.40536	3.09607	2.50065	2.75888	3.29658
Ccrl2	54199	1810047I05Rik|Ackr5|CCR11|Cmkbr1l2|E01|L-CCR	chemokine (C-C motif) receptor-like 2	2.04863	3.53855	3.81876	2.40536	3.74815	5.58812	2.02192	3.8271
Cd160	54215	AU045688|By55	CD160 antigen	2.53405	2.45109	2.45619	3.21271	3.28872	3.08562	2.43695	2.93401
Irgm2	54396	AI481100|GTPI|Ifggd2|Iigp2	immunity-related GTPase family M member 2	4.93615	5.00568	7.64883	4.86479	5.78057	9.45485	5.34384	7.84775
Tollip	54473	4930403G24Rik|4931428G15Rik	toll interacting protein	10.1582	10.7887	11.0141	10.764	10.6875	10.7907	10.088	10.8132
Mefv	54483	FMF|TRIM20|pyrin	Mediterranean fever	-0.2733	2.03605	2.2338	2.72729	2.87368	1.50065	3.60688	1.71162
Dll4	54485	Delta4	delta-like 4 (Drosophila)	2.04863	2.25845	0.648834	1.40536	1.87368	2.91569	3.75888	3.12666
Pdgfc	54635	1110064L01Rik|AI647969|PDGF-C	platelet-derived growth factor, C polypeptide	11.2045	11.276	11.4825	11.135	11.877	12.1218	11.2126	11.901
Tyk2	54721	JTK1	tyrosine kinase 2	5.48159	5.66054	5.79858	5.72729	6.19561	6.29073	6.10938	6.55292
Cxcl13	55985	4631412M08Rik|ANGIE2|Angie|BCA-1|BLC|BLR1L|Scyb13	chemokine (C-X-C motif) ligand 13	0.7267	0.451091	2.45619	2.72729	2.61064	2.72305	2.02192	2.71162
Msln	56047	MPF	mesothelin	12.1618	11.5098	11.6802	11.5646	11.649	11.7787	11.8548	11.7669
Cxcl11	56066	Cxc11|H174|I-tac|Ip9|Itac|Scyb11|Scyb9b|b-R1|betaR1	chemokine (C-X-C motif) ligand 11	2.7267	3.15153	5.37675	4.21271	4.98916	7.58103	4.52442	6.12666
Il17b	56069	1110006O16Rik|1700006N07Rik|Zcyto7	interleukin 17B	9.03504	8.38183	8.60012	8.33017	9.43846	9.93667	9.26668	9.75419
Ccl24	56221	CKb-6|MPIF-2|Scya24	chemokine (C-C motif) ligand 24	2.53405	2.25845	1.2338	1.40536	2.61064	2.23762	2.02192	3.12666
Txnip	56338	1200008J08Rik|AA682105|Hyplip1|THIF|Tbp-2|VDUP1	thioredoxin interacting protein	5.48159	5.67991	5.89676	5.40536	5.64627	8.64021	5.86322	6.81316
Rrad	56437	REM3|Rad	Ras-related associated with diabetes	1.7267	3.84341	3.64883	3.57528	1.87368	1.50065	3.43695	2.71162
Tbk1	56480	1200008B05Rik|AI462036|AW048562	TANK-binding kinase 1	8.89913	8.93893	9.0561	8.99781	9.16523	9.25331	8.83783	9.42128
Ikbke	56489	AW558201|IKK-i|IKKepsilon|Ikki	inhibitor of kappaB kinase epsilon	6.11902	5.75487	6.12457	5.92892	5.78057	6.67058	5.92881	6.74137
Clec4n	56620	Clec6a|Clecsf10|Nkcl	C-type lectin domain family 4, member n	1.7267	1.03605	1.2338	3.21271	0.288717	3.08562	1.43695	2.71162
Clec7a	56644	BGR|Clecsf12|beta-GR	C-type lectin domain family 7, member a	2.53405	-0.548909	1.97076	2.40536	1.28872	3.08562	2.75888	2.93401
Tdo2	56720	AA407491|TDO|TO|chky	tryptophan 2,3-dioxygenase	2.89662	2.45109	2.64883	2.99032	2.28872	3.23762	2.43695	3.12666
Litaf	56722	3222402J11Rik|C85531|N4WBP3|TBX1	LPS-induced TN factor	9.45802	8.99412	9.61462	9.02007	9.56484	10.4095	8.72697	9.88154
Ccl28	56838	CCK1|MEC|Scya28	chemokine (C-C motif) ligand 28	2.53405	1.03605	2.2338	1.40536	2.87368	3.37512	2.43695	2.71162
Cxcl14	57266	1110031L23Rik|1200006I23Rik|AI414372|BMAC|BRAK|KS1|Kec|MIP-2g|MIP2gamma|NJAC|Scyb14|bolekine	chemokine (C-X-C motif) ligand 14	2.04863	2.77302	2.64883	1.99032	2.87368	2.72305	2.75888	3.29658
Ppbp	57349	2400003M24Rik|AI854500|CTAP3|CTAPIII|Cxcl7|LA-PF4|LDGF|MDGF|NAP-2|NAP-2-L1|Scyb7|TGB|TGB1|THBGB1|b-TG1|beta-TG	pro-platelet basic protein	7.13609	6.13759	5.85829	6.02007	4.68103	4.00315	5.56624	4.37458
Isg20	57444	1600023I01Rik|2010107M23Rik|20kDa|DnaQL|HEM45	interferon-stimulated protein	10.6655	10.4476	10.7665	10.645	9.41542	10.2622	9.2887	9.53392
Tbx21	57765	TBT1|Tbet|Tblym	T-box 21	1.7267	2.45109	2.45619	2.40536	3.28872	3.23762	3.02192	3.8271
Cd200r1	57781	CD200R|Mox2r|OX2R	CD200 receptor 1	2.7267	2.25845	2.2338	1.99032	1.28872	3.37512	2.43695	3.29658
Tnfrsf13b	57916	1200009E08Rik|Taci	tumor necrosis factor receptor superfamily, member 13b	1.31166	1.77302	1.64883	0.405358	1.87368	2.50065	3.89638	1.71162
Rsad2	58185	2510004L01Rik|Vig1|cig5	radical S-adenosyl methionine domain containing 2	3.31166	5.47346	7.62611	4.86479	6.49817	9.49501	5.29493	7.77051
Zbp1	58203	2010010H03Rik|Dai|Dlm1|mZaDLM	Z-DNA binding protein 1	4.6809	7.38183	9.43019	7.13328	6.71498	10.8293	5.24431	8.49734
Pdcd1lg2	58205	B7-DC|Btdc|F730015O22Rik|PD-L2	programmed cell death 1 ligand 2	2.31166	3.15153	3.2338	2.72729	6.19561	6.5304	4.24431	6.74137
Trem1	58217	-	triggering receptor expressed on myeloid cells 1	1.7267	1.77302	1.97076	1.99032	2.87368	3.23762	3.43695	3.93401
F12	58992	FXII|HAF	coagulation factor XII (Hageman factor)	0.7267	-0.548909	1.97076	2.99032	2.28872	1.91569	2.75888	2.93401
Smpd3	58994	4631433G07Rik|AI427456|AW537966|fro|nSMase2	sphingomyelin phosphodiesterase 3, neutral	4.37056	3.84341	4.60303	3.21271	4.09607	4.16362	4.52442	4.44858
Il1rapl2	60367	-	interleukin 1 receptor accessory protein-like 2	3.18613	2.91052	2.81876	2.40536	1.87368	3.37512	3.43695	2.93401
Il21r	60504	NILR	interleukin 21 receptor	2.53405	2.45109	1.97076	1.99032	2.28872	2.23762	2.43695	2.12666
Il21	60505	IL-21	interleukin 21	2.31166	2.45109	1.2338	1.99032	1.28872	2.50065	1.43695	2.44858
Cd274	60533	A530045L16Rik|B7h1|Pdcd1l1|Pdcd1lg1|Pdl1	CD274 antigen	5.6809	6.55962	6.68226	6.1058	8.11526	9.85821	6.39115	9.1765
Cxcl16	66102	0910001K24Rik|AV290116|BB024863|CXCL16v1|CXCL16v2|SR-PSOX|Zmynd15|b2b498Clo	chemokine (C-X-C motif) ligand 16	2.31166	1.77302	1.64883	1.40536	2.61064	1.50065	2.75888	2.71162
Tab1	66513	2310012M03Rik|Map3k7ip1|b2b449Clo	TGF-beta activated kinase 1/MAP3K7 binding protein 1	9.47992	9.65566	9.70683	9.81475	9.32764	9.92692	9.30732	9.58404
Atg10	66795	5330424L23Rik|5430428K15Rik|AI852123|APG10|Agp10|Apg10l|Apg10p|Atg10l	autophagy related 10	5.89662	5.30907	5.85829	5.21271	5.53664	6.54505	5.39115	5.88154
Pycard	66824	9130417A21Rik|Asc|CARD5|TMS-1|TNS1|masc	PYD and CARD domain containing	1.31166	2.25845	2.2338	1.99032	2.28872	1.91569	3.02192	1.12666
Herc6	67138	1700121D12Rik|2510038N07Rik|4930427L17Rik|AI451296|CEB1|Herc5	hect domain and RLD 6	8.47153	8.78648	9.79222	8.86068	9.50546	11.3346	8.91269	10.0078
Atg12	67526	4931423H11Rik|A330058M13Rik|Apg12l|Atg12l	autophagy related 12	8.96987	8.71788	9.09178	8.42217	8.95049	9.90721	8.3196	9.40511
Dusp6	67603	1300019I03Rik|MKP-3|MKP3|PYST1	dual specificity phosphatase 6	8.48492	9.08045	9.04971	8.98656	9.81228	11.0654	8.24431	9.86644
Anp32b	67628	2410015B15Rik|PAL31|PHAPI2a|Ssp29	acidic (leucine-rich) nuclear phosphoprotein 32 family, member B	13.2386	13.469	13.3087	13.4305	13.4554	12.8615	13.4162	13.093
Ifitm1	68713	1110036C17Rik|DSPA2a|Mil-2|Mil2	interferon induced transmembrane protein 1	3.31166	3.03605	3.7363	3.40536	3.45864	3.23762	3.43695	2.93401
Hspb2	69253	27kDa|2810021G24Rik|HSP27|MKBP	heat shock protein 2	10.0665	9.92073	10.3397	9.91117	10.4334	10.6048	10.1868	10.4952
C8g	69379	-	complement component 8, gamma polypeptide	3.04863	3.35798	2.97076	3.40536	3.28872	3.72305	3.89638	3.8271
Bst2	69550	2310015I10Rik|Bst-2|C87040|CD317|DAMP-1|GREG	bone marrow stromal cell antigen 2	11.0046	11.7324	13.0919	11.7307	11.4161	13.8809	11.079	12.5628
Tnfsf13	69583	2310026N09Rik|April|Tall2|Trdl1	tumor necrosis factor (ligand) superfamily, member 13	2.53405	2.91052	3.55572	0.405358	2.28872	4.61613	2.75888	3.58609
Ifi35	70110	2010008K16Rik|AW986054|IFP35|ifi-35	interferon-induced protein 35	9.45121	10.0238	10.8866	9.91711	9.47359	11.2466	9.08441	10.1954
Cd3eap	70333	1190028F09|2610103M17Rik|ASE-1|Ase1|CAST|PAF49	CD3E antigen, epsilon polypeptide associated protein	8.02132	8.70612	8.42362	8.66745	8.81228	7.67724	8.74529	8.18194
Pnma1	70481	5730402C15Rik	paraneoplastic antigen MA1	1.7267	3.77302	2.45619	1.99032	2.28872	3.61613	4.02192	2.71162
Ifih1	71586	9130009C22Rik|Helicard|Hlcd|MDA5|RLR-2	interferon induced with helicase C domain 1	6.93615	7.91462	9.21869	7.64376	8.50788	10.7343	7.64641	9.49952
Chit1	71884	2300002L19Rik	chitinase 1 (chitotriosidase)	2.53405	1.77302	3.10827	2.40536	1.87368	2.91569	2.02192	3.12666
Tnfrsf13c	72049	2010006P15Rik|BAFF-R|Baffr|Bcmd|Bcmd-1|Bcmd1|Lvis22	tumor necrosis factor receptor superfamily, member 13c	3.04863	1.45109	2.45619	2.72729	1.28872	3.37512	2.02192	2.44858
Spink5	72432	2310065D10Rik|AV238912|LEKT1|LETK1|VAKT1	serine peptidase inhibitor, Kazal type 5	2.04863	2.25845	2.2338	1.40536	2.28872	0.915692	0.436953	1.71162
Tmem173	72512	2610307O08Rik|ERIS|MPYS|Mita|STING	transmembrane protein 173	5.31166	7.01333	7.3903	7.07778	7.28872	7.69705	6.91269	7.34582
Nfatc4	73181	3110041H08Rik|AW107667|AW546455|Nfat3	nuclear factor of activated T cells, cytoplasmic, calcineurin dependent 4	3.31166	2.03605	3.34927	1.40536	2.61064	3.50065	1.43695	2.71162
Irak3	73914	4833428C18Rik|AI563835|IRAK-M	interleukin-1 receptor-associated kinase 3	2.31166	1.45109	2.45619	2.40536	1.28872	2.91569	2.43695	2.12666
F13a1	74145	1200014I03Rik|AI462306|F13a	coagulation factor XIII, A1 subunit	2.53405	1.77302	1.64883	2.40536	1.28872	2.91569	2.75888	1.71162
Atg7	74244	1810013K23Rik|Agp7|Apg7l|Atg7l|Gm21553	autophagy related 7	8.16133	8.04355	8.23003	8.04921	8.02343	8.49312	8.00681	8.1765
Cyld	74256	2010013M14Rik|2900009M21Rik|C130039D01Rik|CDMT|CYLD1|EAC|mKIAA0849	cylindromatosis (turban tumor syndrome)	9.977	9.84126	9.35101	9.60748	9.55784	9.34823	9.47313	9.52754
Slamf7	75345	19A|19A24|4930560D03Rik|CRACC|CS1	SLAM family member 7	0.7267	1.77302	1.2338	1.40536	1.28872	2.50065	2.75888	0.126656
Cklf	75458	1700001C14Rik|1810018M11Rik|C32|CKLF1|CKLF3|CKLF4|CKLF5|Cklf2|Cklf6|HSPC224|UCK-1	chemokine-like factor	6.39913	6.08045	6.26354	5.79768	6.266	5.98178	5.68488	6.21412
Il34	76527	2010004A03Rik|AI593503	interleukin 34	9.19431	8.99606	9.01516	8.71824	9.33856	9.37512	9.01438	9.26621
Cyfip2	76884	1500004I01Rik|6430511D02Rik|AA930218|AU022376|Pir121|mKIAA1168	cytoplasmic FMR1 interacting protein 2	6.20243	5.51718	5.95261	5.16024	5.33311	5.40755	5.43695	5.65022
Atg16l1	77040	1500009K01Rik|Apg16l|Atg16l|WDR30	autophagy related 16-like 1 (S. cerevisiae)	9.09956	9.47623	9.38185	9.21914	9.38938	9.58635	9.32265	9.46651
Ulbp1	77777	A430108B07Rik|MULT1	UL16 binding protein 1	9.95672	10.1705	9.54214	9.89921	10.5378	9.51002	10.0608	9.89153
Icam4	78369	1810015M19Rik|Cd242|ICAM-4	intercellular adhesion molecule 4, Landsteiner-Wiener blood group	2.31166	2.62102	2.64883	3.21271	0.288717	1.91569	2.02192	1.71162
Ifitm2	80876	DSPA2c|Ifitm3l|fragilis3|mil-3	interferon induced transmembrane protein 2	12.3336	13.2072	13.5693	13.3626	12.2436	12.6985	11.9987	12.4233
Cxcr6	80901	BB217514|BONZO|STRL33	chemokine (C-X-C motif) receptor 6	3.53405	8.13409	8.31772	8.20626	3.87368	3.23762	4.96052	3.93401
Tlr9	81897	-	toll-like receptor 9	3.04863	2.91052	3.10827	3.72729	3.09607	2.50065	3.75888	3.58609
Il23a	83430	IL-23|p19	interleukin 23, alpha subunit p19	2.04863	1.03605	0.648834	2.40536	2.61064	2.23762	2.43695	2.93401
Trem2	83433	TREM-2|Trem2a|Trem2b|Trem2c	triggering receptor expressed on myeloid cells 2	5.04863	4.25845	4.50682	4.1058	4.19561	3.72305	3.24431	3.71162
Jam3	83964	1110002N23Rik|JAM-3|JAM-C|Jcam3	junction adhesion molecule 3	7.65744	5.86048	6.04115	6.16024	7.08313	7.33354	6.45932	7.02147
Mcam	84004	1-gicerin|AV025631|CD146|CD149|Muc18|s-endo|s-gicerin	melanoma cell adhesion molecule	9.33957	7.89403	7.31417	7.7804	8.63744	8.12026	7.71308	7.92107
Hamp	84506	Hamp1|Hepc|Hepc1	hepcidin antimicrobial peptide	2.04863	2.25845	2.81876	3.40536	1.87368	2.91569	3.02192	3.12666
Cd96	84544	1700109I12Rik|Tactile	CD96 antigen	2.53405	2.77302	1.97076	3.57528	3.09607	2.50065	3.43695	2.71162
Cd163	93671	CD163v2|CD163v3	CD163 antigen	2.7267	3.15153	3.7363	3.21271	3.28872	3.37512	3.24431	3.12666
Il24	93672	FISP|Mda-7|Mda7|St16	interleukin 24	4.93615	4.35798	3.55572	3.86479	4.28872	3.08562	4.34384	3.58609
Klra20	93967	Ly49t	killer cell lectin-like receptor subfamily A, member 20	2.31166	2.25845	2.81876	2.72729	2.87368	3.50065	3.60688	3.93401
Klra21	93968	Klra-ps1|Ly49H|Ly49u	killer cell lectin-like receptor subfamily A, member 21	3.63359	3.15153	3.45619	2.72729	3.09607	3.08562	3.75888	3.58609
Ifi44	99899	A430056A10Rik|AW261460|MTAP44|p44	interferon-induced protein 44	3.18613	6.29658	9.48172	6.04921	6.17136	12.2713	4.02192	9.64038
Cd276	102657	6030411F23Rik|AU016588|B7RP-2|B7h3	CD276 antigen	9.21454	10.2536	10.3221	10.2207	9.53189	9.9171	9.41709	9.57374
Nup107	103468	AW541137|C76801	nucleoporin 107	10.6896	10.9834	10.8926	10.9161	10.7139	10.323	10.6537	10.4995
Dock9	105445	AA959601|AW538057|B230309H04Rik|D14Wsu89e|Zizimin1|mKIAA1058	dedicator of cytokinesis 9	8.56905	9.19928	8.96625	9.00527	8.60613	8.6265	8.49224	8.81665
Ticam1	106759	AW046014|AW547018|TICAM-1|TRIF	toll-like receptor adaptor molecule 1	7.59706	7.0658	7.37675	7.46064	7.13421	8.12514	7.33177	7.80614
Il1rl2	107527	AI481289|AW551444|IL-1Rrp2	interleukin 1 receptor-like 2	2.7267	2.62102	3.34927	2.72729	3.28872	-0.0843081	3.75888	3.58609
Nod1	107607	C230079P11|Card4|F830007N14Rik|Nlrc1	nucleotide-binding oligomerization domain containing 1	5.11902	4.66054	4.64883	4.65329	5.1467	5.89297	5.48135	5.58609
Usp9y	107868	Dffry|Fafl2	ubiquitin specific peptidase 9, Y chromosome	1.7267	1.45109	0.648834	1.99032	0.288717	1.91569	0.436953	1.71162
Epsti1	108670	2310046K10Rik|5033415K03Rik|BRESI1	epithelial stromal interaction 1 (breast)	1.31166	2.03605	0.648834	1.99032	2.28872	1.50065	2.43695	2.44858
Card11	108723	0610008L17Rik|2410011D02Rik|BIMP3|CARMA1	caspase recruitment domain family, member 11	0.7267	1.77302	1.97076	3.21271	1.28872	2.23762	1.43695	2.44858
Irak2	108960	6330415L08Rik|AI649099|IRAK-2	interleukin-1 receptor-associated kinase 2	6.0121	5.09495	5.69323	5.31225	5.90343	7.31657	5.68488	7.13788
Itga1	109700	CD49A|E130012M19Rik|Vla1	integrin alpha 1	3.31166	2.91052	2.97076	0.405358	2.61064	1.91569	4.13739	2.44858
C7	109828	A530026G17|Gm1238	complement component 7	2.53405	-0.548909	2.2338	0.405358	1.28872	1.91569	3.24431	0.126656
Syt17	110058	Bk	synaptotagmin XVII	5.34141	3.53855	3.81876	4.1058	4.61064	5.04497	4.52442	4.51897
Pmch	110312	A230109K23Rik	pro-melanin-concentrating hormone	2.31166	2.25845	1.97076	1.99032	3.09607	2.72305	3.24431	1.12666
C8b	110382	4930439B20Rik|AI595927	complement component 8, beta polypeptide	3.18613	2.25845	2.45619	1.40536	1.87368	1.50065	0.436953	2.12666
Lyve1	114332	1200012G08Rik|Crsbp-1|Lyve-1|Xlkd1	lymphatic vessel endothelial hyaluronan receptor 1	-0.2733	0.451091	-0.351166	0.405358	2.61064	0.915692	0.436953	2.44858
Tirap	117149	AA407980|C130027E04Rik|Mal|Tlr4ap|Wyatt	toll-interleukin 1 receptor (TIR) domain-containing adaptor protein	8.00282	7.57003	7.5497	7.50339	8.40766	8.2994	8.19184	8.05147
Cspg4	121021	4732461B14Rik|AN2|NG2	chondroitin sulfate proteoglycan 4	2.7267	2.03605	1.64883	1.99032	1.28872	2.72305	2.02192	1.12666
Colec12	140792	CL-P1|SRCL|Scara4	collectin sub-family member 12	10.0418	8.39946	8.70953	7.94452	9.45864	10.4884	8.94871	9.90309
Il25	140806	IL-17e|Il17e	interleukin 25	2.7267	2.25845	2.45619	3.21271	3.09607	2.23762	0.436953	2.93401
Tlr3	142980	AI957183	toll-like receptor 3	7.10174	6.98247	7.7363	6.69076	6.74815	8.77988	6.02192	7.82014
Klra17	170733	Ly49q|Ly49q1	killer cell lectin-like receptor, subfamily A, member 17	2.53405	2.25845	2.97076	2.40536	3.61064	3.08562	3.60688	3.44858
Tlr7	170743	-	toll-like receptor 7	2.7267	3.15153	3.2338	2.40536	3.61064	2.72305	1.43695	2.93401
Tlr8	170744	-	toll-like receptor 8	1.31166	2.62102	2.2338	2.72729	2.28872	1.50065	3.24431	2.12666
Cd209e	170780	SIGNR4|mSIGNR4	CD209e antigen	3.42714	2.62102	2.2338	3.40536	3.45864	3.82258	2.75888	2.93401
Havcr2	171285	TIM-3|Tim3|Timd3	hepatitis A virus cellular receptor 2	2.7267	2.62102	2.81876	1.99032	2.61064	3.72305	3.02192	3.12666
Ripk2	192656	2210420D18Rik|CARD3|CARDIAK|CCK|D4Bwg0615e|RICK|RIP2	receptor (TNFRSF)-interacting serine-threonine kinase 2	8.59398	9.02852	8.78583	8.85244	8.32764	8.76431	8.64152	8.61047
Itgb4	192897	AA407042|C230078O20|CD104	integrin beta 4	4.6809	5.25845	5.95261	5.35955	5.90343	6.43925	5.68488	5.95955
Btla	208154	A630002H24	B and T lymphocyte associated	2.31166	2.03605	3.2338	2.72729	2.87368	3.50065	2.43695	2.71162
Tfe3	209446	F830016E06Rik|Tcfe3|Tfe-3|bHLHe33	transcription factor E3	7.98879	8.25522	8.53453	8.30622	8.1025	8.25999	8.07358	8.31648
Il23r	209590	IL-23R	interleukin 23 receptor	2.53405	-0.548909	0.648834	0.405358	1.28872	0.915692	0.436953	2.44858
Ythdf2	213541	9430020E02Rik|HGRG8|NY-REN-2	YTH domain family 2	10.3551	10.444	10.4037	10.2382	10.5223	10.4539	10.2427	10.289
Sbno2	216161	BC019206|F730040C21|Sno|Stno	strawberry notch homolog 2 (Drosophila)	7.59089	7.67509	7.59135	7.71824	8.1025	7.98715	7.75888	7.77771
Nlrp3	216799	AGTAVPRL|AII/AVP|Cias1|FCAS|FCU|MWS|Mmig1|NALP3|Pypaf1	NLR family, pyrin domain containing 3	2.04863	1.77302	0.648834	0.405358	2.61064	2.23762	2.02192	2.71162
Mpped1	223726	6230403M19|AW456965|D15Bwg0669e	metallophosphoesterase domain containing 1	2.31166	2.25845	2.97076	2.40536	1.28872	2.72305	2.02192	2.44858
Ticam2	225471	B430113A10|TICAM-2|TRAM|Tirp|Trif	toll-like receptor adaptor molecule 2	-0.2733	1.03605	1.64883	2.40536	0.288717	1.50065	3.24431	1.12666
Cxcr1	227288	Il8ra	chemokine (C-X-C motif) receptor 1	2.7267	1.03605	2.2338	0.405358	0.288717	2.23762	2.02192	2.93401
Mavs	228607	D430028G21Rik|IPS-1|Visa|cardif	mitochondrial antiviral signaling protein	9.15296	9.73765	9.84851	9.98844	9.55784	10.371	9.84846	10.041
Gbp5	229898	5330409J06Rik|Gbp5a	guanylate binding protein 5	3.42714	4.62102	6.30705	4.57528	3.74815	7.72305	3.60688	6.03355
Ddx58	230073	6430573D20Rik|C330021E21|RIG-I|RLR-1	DEAD (Asp-Glu-Ala-Asp) box polypeptide 58	9.66921	10.0895	10.8962	9.875	10.5247	12.1713	9.96052	11.387
C8a	230558	-	complement component 8, alpha polypeptide	1.7267	1.03605	1.2338	2.72729	3.09607	-0.0843081	3.24431	3.12666
Il22ra1	230828	9130219A07Rik|ENSMUSG00000073746|IL-22R|Il22r	interleukin 22 receptor, alpha 1	2.7267	3.25845	3.10827	3.57528	3.45864	3.23762	4.02192	3.8271
Tnfrsf14	230979	Atar|HveA|Hvem|Tnfrs14	tumor necrosis factor receptor superfamily, member 14 (herpesvirus entry mediator)	5.97463	6.57003	6.74687	6.42773	5.87368	6.74858	5.72235	6.66581
Oasl1	231655	7530414C13Rik|oasl9	2'-5' oligoadenylate synthetase-like 1	2.04863	5.75487	7.52535	5.69076	5.68103	7.28201	4.02192	5.77051
Creb5	231991	Crebpa|D430026C09Rik	cAMP responsive element binding protein 5	5.58468	4.97465	5.2338	5.1058	5.33311	5.47028	4.52442	5.12666
A2m	232345	A2mp	alpha-2-macroglobulin	1.7267	2.25845	1.64883	2.72729	3.45864	2.50065	3.75888	4.03355
Lilra5	232801	E030017K20|EG232801|Gm4878|Lilrc1	leukocyte immunoglobulin-like receptor, subfamily A (with TM domain), member 5	2.53405	2.25845	3.10827	1.40536	3.74815	3.23762	2.43695	4.03355
Gtf3c1	233863	-	general transcription factor III C 1	9.81681	9.7764	9.78839	9.68845	9.63744	10.0578	9.54286	9.93562
Ddx60	234311	9830118M07	DEAD (Asp-Glu-Ala-Asp) box polypeptide 60	4.37056	4.35798	6.20342	3.99032	5.71498	8.84643	5.24431	7.40278
Fez1	235180	UNC-76|UNC76	fasciculation and elongation protein zeta 1 (zygin I)	2.53405	2.62102	2.2338	1.99032	2.61064	4.23762	2.75888	3.29658
Il22ra2	237310	CRF2-10|CRF2-s1|CRF2X|Il-22bp	interleukin 22 receptor, alpha 2	3.42714	2.03605	3.10827	1.99032	1.87368	3.50065	3.89638	3.8271
Lamp3	239739	1200002D17Rik|Cd208|DC-LAMP|DCLAMP|LAMP|TSC403	lysosomal-associated membrane protein 3	2.04863	2.03605	2.81876	3.40536	2.28872	1.50065	3.43695	2.93401
Tnfsf18	240873	Gitrl	tumor necrosis factor (ligand) superfamily, member 18	2.31166	3.35798	3.34927	2.72729	4.61064	2.50065	3.43695	3.93401
Mill2	243864	Micb	MHC I like leukocyte 2	-0.2733	2.03605	1.2338	1.40536	1.28872	2.91569	2.02192	2.71162
Fcgr4	246256	4833442P21Rik|CD16-2|FcgRIV|FcgammaRIV|Fcgr3a|Fcrl3	Fc receptor, IgG, low affinity IV	4.63359	4.09495	5.10827	3.57528	5.418	7.21947	4.43695	5.71162
Cd207	246278	-	CD207 antigen	2.89662	1.45109	2.64883	0.405358	3.87368	2.50065	2.43695	3.29658
Oas3	246727	Oasl10	2'-5' oligoadenylate synthetase 3	2.89662	2.77302	5.26354	3.40536	3.28872	6.65716	3.60688	5.12666
Oas2	246728	Oasl11	2'-5' oligoadenylate synthetase 2	3.04863	3.84341	6.93424	3.86479	3.74815	8.47793	2.75888	6.75601
Il27	246779	IL-27|IL-27p28|Il30|p28	interleukin 27	2.7267	2.45109	1.97076	1.40536	1.28872	2.72305	2.43695	2.12666
Il17f	257630	C87042|IL-17F	interleukin 17F	1.7267	1.45109	1.97076	1.99032	2.61064	2.91569	3.43695	2.71162
Nod2	257632	ACUG|BLAU|CD|Card15|F830032C23Rik|IBD1|Nlrc2	nucleotide-binding oligomerization domain containing 2	4.58468	4.77302	3.10827	4.40536	3.45864	4.37512	4.02192	4.58609
Irak4	266632	8430405M07Rik|9330209D03Rik|IRAK-4|NY-REN-64	interleukin-1 receptor-associated kinase 4	8.33772	8.59575	8.98422	9.00898	8.26026	9.18248	8.37359	8.88488
Amica1	270152	AMICA|Crea7|Gm638|Jaml	adhesion molecule, interacts with CXADR antigen 1	3.7267	4.15153	4.04115	4.21271	3.98916	4.67058	4.75888	4.29658
Timd4	276891	B430010N18Rik|TIM-4|Tim4	T cell immunoglobulin and mucin domain containing 4	2.53405	2.77302	2.97076	0.405358	1.87368	1.91569	2.02192	2.44858
Dusp4	319520	2700078F24Rik|AI844617|BB104621|E130306H24Rik|MKP2	dual specificity phosphatase 4	7.85598	9.67871	10.0508	9.32422	10.7685	10.7093	8.8548	10.4236
Gpr183	321019	Ebi2	G protein-coupled receptor 183	1.31166	2.62102	1.64883	2.40536	3.28872	1.50065	2.75888	3.12666
Tnfsf15	326623	Tl1|Tl1a|Vegi	tumor necrosis factor (ligand) superfamily, member 15	2.31166	2.25845	2.2338	2.72729	1.87368	3.23762	3.02192	2.71162
Xaf1	327959	Fbox39	XIAP associated factor 1	7.87645	8.97269	10.9226	8.78474	9.02681	12.2771	8.20514	10.7849
Ep300	328572	A430090G16|A730011L11|KAT3B|p300|p300 HAT	E1A binding protein p300	10.0418	10.3474	9.95603	9.97331	9.63523	9.88003	9.86531	10.0078
Il19	329244	-	interleukin 19	3.42714	3.97465	3.34927	2.72729	2.61064	2.91569	3.24431	3.8271
Cxcl3	330122	Dcip1|Gm1960	chemokine (C-X-C motif) ligand 3	1.7267	1.77302	1.2338	0.405358	2.28872	1.50065	0.436953	2.12666
Ifnl2	330496	EG330496|IL-28A|Il28a	interferon lambda 2	3.04863	3.15153	2.45619	2.72729	3.98916	3.50065	2.75888	3.93401
Card9	332579	Gm782	caspase recruitment domain family, member 9	2.31166	1.45109	1.97076	3.57528	2.28872	2.23762	2.43695	2.44858
Cd59b	333883	-	CD59b antigen	1.7267	3.69902	2.64883	3.86479	3.09607	3.72305	4.52442	3.12666
Nlrc5	434341	AI451557|AK220210|NOD27	NLR family, CARD domain containing 5	6.50806	6.12352	6.63752	6.35955	6.1467	8.03981	5.56624	7.43044
Ccl26	541307	Ccl26l	chemokine (C-C motif) ligand 26	2.31166	1.77302	1.97076	2.40536	1.28872	1.91569	2.02192	0.126656
Klra27	639946	Ly49e/c2	killer cell lectin-like receptor, subfamily A, member 27	5.15296	5.45109	4.93424	5.31225	4.53664	4.23762	4.60688	4.77051
Cd99	673094	1110061M03Rik|2410026K10Rik|D4|Pilr-l|pilr-1	CD99 antigen	7.04863	6.24551	6.59135	6.57528	6.01664	6.04497	5.56624	5.93401
Isg15	100038882	G1p2|IGI15|IP17|Irfp|UCRP	ISG15 ubiquitin-like modifier	8.53727	9.30284	11.2182	9.05999	9.43592	12.8641	8.61686	11.0085
Tigit	100043314	ENSMUSG00000071552|Vstm3	T cell immunoreceptor with Ig and ITIM domains	6.52112	7.51179	7.10005	7.59518	6.39724	4.86989	6.5867	5.37458
Klrb1	100043861	4930431A04Rik|Gm4696|Klrb1g|Klrb6|Ly-55|Ly55|NKR-P1G|Nkrp-1e|Nkrp1g	killer cell lectin-like receptor subfamily B member 1	2.89662	0.451091	2.81876	2.99032	3.45864	3.50065	3.43695	3.71162
Tpsab1	100503895	MMCP-7|Mcp-7|Mcp7|Mcpt7	tryptase alpha/beta 1	2.89662	1.77302	2.81876	0.405358	3.09607	2.50065	3.60688	3.44858
H2-Ea-ps	100504404	AI323765|E-alpha-f|H-2Ea|H2-Ea|I-Ealpha|Ia-3|Ia3|MHC-H2-Ea	histocompatibility 2, class II antigen E alpha, pseudogene	1.7267	0.451091	0.648834	1.99032	1.28872	0.915692	0.436953	1.12666
