# Supplementary material for: Kindlin-1 regulates IL-6 secretion and modulates the immune environment in breast cancer models
Source: eLife. 2023 Mar 8;12:e85739. doi: 10.7554/eLife.85739 (PMC10023156; doi:10.7554/eLife.85739)
Supplement: Source data 1. [file elife-85739-data1.csv]

NanoString PanCancer Immune panel analysis of bulk MET-01 tumours at day 10 (normalised expression)
Name	Gene ID	Alias	Description	WT 1	WT 2	WT 3	WT 4	NULL 1	NULL 2	NULL 3	NULL 4
Abca1	11303	ABC-1|Abc1	ATP-binding cassette, sub-family A (ABC1), member 1	9.80422	9.68774	9.73557	10.0178	10.4208	10.5945	9.2027	9.80312
Abcg1	11307	AW413978|Abc8|White	ATP-binding cassette, sub-family G (WHITE), member 1	8.47641	9.53326	8.88054	8.61696	9.8272	10.3618	10.1332	10.1714
Abl1	11350	AI325092|Abl|E430008G22Rik|c-Abl	c-abl oncogene 1, non-receptor tyrosine kinase	8.23421	9.0827	8.68277	8.55423	9.33831	9.66486	9.88878	9.92409
Ada	11486	-	adenosine deaminase	5.76114	5.991	5.0978	5.6218	5.53096	5.29729	5.54449	5.0786
Cfd	11537	Adn|DF	complement factor D (adipsin)	8.22057	6.51038	4.0978	3.72134	6.32614	8.01349	9.12191	9.42733
Adora2a	11540	A2AAR|A2aR|AA2AR	adenosine A2a receptor	3.73944	4.25404	3.30931	3.27388	4.61342	4.81186	4.54449	4.98549
Angpt1	11600	1110046O21Rik|Ang-1|Ang1	angiopoietin 1	5.98045	5.10648	5.1718	5.172	5.57278	5.39682	4.86641	5.32653
Angpt2	11601	Agpt2|Ang-2|Ang2	angiopoietin 2	7.02596	6.16093	6.80407	7.03845	6.85289	6.77533	6.06805	6.72246
Aicda	11628	Aid|Arp2	activation-induced cytidine deaminase	1.86497	1.66907	2.43484	2.27388	3.4435	4.48993	5.45138	4.53803
Aire	11634	-	autoimmune regulator (autoimmune polyendocrinopathy candidiasis ectodermal dystrophy)	1.69505	2.78455	2.65723	2.27388	3.25085	3.81186	5.54449	4.77904
Alcam	11658	AI853494|BEN|CD166|DM-GRASP|MuSC|SC1	activated leukocyte cell adhesion molecule	6.93345	6.90429	6.87224	6.91774	6.63332	6.81186	6.63195	6.83349
Ambp	11699	AI194774|ASPI|HI-30|Intin4|Itil|UTI	alpha 1 microglobulin/bikunin	2.28001	1.40604	2.84988	2.27388	3.25085	3.0749	4.12945	3.0786
Atg5	11793	2010107M05Rik|3110067M24Rik|AW319544|Apg5l|Atg5l|C88337|Paddy	autophagy related 5	6.63756	7.02663	6.65723	6.77445	7.48789	7.28435	7.37738	7.28806
Birc5	11799	AAC-11|Api4|TIAP|survivin40	baculoviral IAP repeat-containing 5	8.63169	9.09953	9.07869	8.98563	8.69142	8.48993	8.70436	8.05588
Apoe	11816	AI255918|Apo-E	apolipoprotein E	14.1914	13.6452	13.8104	13.9632	13.8558	13.1786	13.3002	12.8255
App	11820	Abeta|Abpp|Adap|Ag|Cvap|E030013M08Rik|betaApp	amyloid beta (A4) precursor protein	11.3328	11.0578	11.3129	11.278	11.609	11.6192	11.4025	11.2182
Arg1	11846	AI|AI256583|Arg-1|PGIF	arginase, liver	8.55303	6.991	9.15821	10.236	7.38601	9.58533	8.29937	8.48799
Arg2	11847	AII|AU022422	arginase type II	3.21861	4.89147	2.65723	3.56934	6.11592	5.65986	6.06805	6.85996
Atf1	11908	-	activating transcription factor 1	6.30238	5.97893	6.49373	6.172	6.14394	6.37258	5.86641	5.83349
Atf2	11909	Atf-2|CRE-BP|Creb2|D130078H02Rik|D18875|Tg(Gzma-Klra1)7Wum|mXBP	activating transcription factor 2	7.47312	7.70982	7.60476	7.58263	7.8272	7.87364	7.82989	7.64846
Atm	11920	AI256621|C030026E19Rik	ataxia telangiectasia mutated	7.13799	7.42841	7.43484	7.27797	7.21168	7.16236	6.79241	7.26843
Bax	12028	-	BCL2-associated X protein	7.27625	6.94209	7.33369	7.20677	7.15774	6.99773	6.45138	6.93658
Bcl10	12042	AI132454|BCL-10|C81403|CARMEN|CIPER|CLAP|ME10|cE10	B cell leukemia/lymphoma 10	8.28563	7.92646	8.13528	8.16759	7.60337	8.09726	7.88434	7.47092
Bcl2	12043	AW986256|Bcl-2|C430015F12Rik|D630044D05Rik|D830018M01Rik	B cell leukemia/lymphoma 2	6.0349	6.7776	6.81566	6.75696	7.13	7.43245	7.9368	7.5864
Bcl2l1	12048	Bcl(X)L|Bcl-XL|Bcl2l|BclX|bcl-x|bcl2-L-1	BCL2-like 1	8.3116	8.35324	8.84423	8.71078	8.46031	8.47293	8.72439	8.71523
Bcl6	12053	Bcl5	B cell leukemia/lymphoma 6	6.69505	6.44166	6.53638	6.58263	6.48789	6.42067	7.09907	6.364
Bid	12122	2700049M22Rik|AI875481|AU022477	BH3 interacting domain death agonist	7.75844	7.06711	7.38903	7.68481	7.26368	6.96567	6.00392	6.0786
Prdm1	12142	Blimp-1|Blimp1|PRDI-BF1|ZNFPR1A1|b2b1765Clo	PR domain containing 1, with ZNF domain	5.61391	6.8523	5.73252	5.83682	5.90293	6.29729	7.12945	6.20789
Blk	12143	-	B lymphoid kinase	0.695047	2.78455	0.849876	1.98437	3.61342	2.81186	2.54449	2.0786
Cxcr5	12145	Blr1|CXC-R5|CXCR-5|Gpcr6|MDR15	chemokine (C-X-C motif) receptor 5	1.5024	1.89147	3.30931	1.81445	2.76542	3.48993	1.54449	3.88596
Bmi1	12151	AW546694|Bmi-1|Pcgf4	Bmi1 polycomb ring finger oncogene	6.61391	5.21339	5.78061	5.99436	5.80105	5.81186	6.00392	5.66357
Bst1	12182	114/A10|A530073F09|BP-3|Bp3|Bsta1|CD157|Ly65	bone marrow stromal cell antigen 1	4.9045	4.54354	5.30931	5.11823	5.35039	4.39682	3.54449	4.77904
Btk	12229	AI528679|xid	Bruton agammaglobulinemia tyrosine kinase	7.00793	7.41054	6.98943	6.96927	7.27639	7.7091	6.58888	7.34539
Serping1	12258	C1INH|C1nh	serine (or cysteine) peptidase inhibitor, clade G, member 1	9.78052	10.3314	9.11666	9.0178	9.53889	9.90989	8.86641	9.65603
C1qa	12259	AI255395|C1q	complement component 1, q subcomponent, alpha polypeptide	12.5901	12.7528	12.6224	12.4761	12.7384	12.6599	11.2275	11.786
C1qb	12260	-	complement component 1, q subcomponent, beta polypeptide	12.477	12.2313	12.3666	12.1525	12.0485	11.8839	9.76849	10.5664
C1qbp	12261	AA407365|AA986492|D11Wsu182e|HABP1|P32|gC1qBP	complement component 1, q subcomponent binding protein	9.5731	9.22622	9.53813	9.39188	9.13698	9.05979	8.57791	8.33599
C2	12263	-	complement component 2 (within H-2S)	8.76651	9.51456	8.40062	8.15207	8.55202	9.37258	7.84827	8.67106
Ciita	12265	C2ta|EG669998|Gm9475|Mhc2ta	class II transactivator	6.93345	8.33204	6.79239	6.84235	8.20505	8.79827	8.36466	8.64846
C3	12266	AI255234|ASP|HSE-MSF|Plp	complement component 3	10.7226	11.2227	9.83856	9.95656	11.0313	11.2589	10.3962	10.9083
C3ar1	12267	AZ3B|C3AR|HNFAG09	complement component 3a receptor 1	10.9212	11.2727	11.1881	11.2626	11.0729	11.3236	11.5501	11.063
C4b	12268	C4|Ss	complement component 4B (Chido blood group)	9.69364	9.68588	9.1422	8.61373	8.6084	9.10832	7.98743	9.26348
C5ar1	12273	C5aR|C5r1|Cd88|D7Msu1	complement component 5a receptor 1	9.16061	8.1502	9.32155	8.93728	8.7427	8.73311	7.81127	7.85996
C6	12274	AW111623	complement component 6	4.1869	3.72797	3.43484	3.06238	3.61342	3.81186	4.54449	4.88596
C9	12279	-	complement component 9	2.01698	2.89147	4.0198	1.81445	3.90293	4.19037	5.63195	4.24853
Casp1	12362	ICE|Il1bc	caspase 1	9.47968	9.0728	9.42163	9.21639	9.63579	9.42657	8.02022	8.73681
Casp3	12367	A830040C14Rik|AC-3|Apopain|CASP-3|CC3|CPP-32|CPP32|Caspase-3|Lice|SCA-1|Yama|mldy	caspase 3	8.40929	8.26153	8.16729	8.14312	8.35039	8.59846	8.17384	7.94897
Casp8	12370	CASP-8|FLICE|MACH|Mch5	caspase 8	8.89226	8.55172	8.8611	8.78455	8.76993	8.81636	7.71441	8.11203
Runx1	12394	AML1|CBF-alpha-2|Cbfa2|Pebp2a2|Pebpa2b	runt related transcription factor 1	10.5658	9.85147	10.2206	10.3311	10.3307	10.3165	8.8754	9.29292
Runx3	12399	AML2|Cbfa3|Pebp2a3	runt related transcription factor 3	4.28001	5.6387	5.0978	5.29018	6.53096	6.99773	7.81127	6.93658
Ccnd3	12445	9230106B05Rik|AA682053|AL024085|AW146355|C78795	cyclin D3	6.66659	6.86547	6.72024	6.4583	6.85289	7.02909	6.58888	7.00934
Ccr6	12458	CC-CKR-6|CCR-6|Cmkbr6|KY411	chemokine (C-C motif) receptor 6	4.80357	5.08411	4.0198	3.76864	5.69142	6.04452	5.12945	5.66357
Cd14	12475	-	CD14 antigen	8.09165	6.87853	7.82142	7.74814	8.2444	8.21103	7.81127	8.25851
Ctla4	12477	Cd152|Ctla-4|Ly-56	cytotoxic T-lymphocyte-associated protein 4	6.1129	6.7776	5.9584	5.32224	7.07285	7.21785	6.18834	6.57046
Cd19	12478	AW495831	CD19 antigen	2.69505	2.40604	3.0198	2.27388	3.25085	3.0749	4.35184	4.0786
Cd1d1	12479	AI747460|CD1.1|Cd1a|Cd1d|Ly-38	CD1d1 antigen	6.40929	6.12851	6.0978	6.0239	6.53096	6.77533	6.71441	7.72246
Cd1d2	12480	CD1.2|Cd1b|Ly-38	CD1d2 antigen	2.28001	3.47643	3.30931	2.98437	4.35039	3.81186	5.86641	5.0786
Cd2	12481	LFA-2|Ly-37|Ly37	CD2 antigen	4.62578	6.24398	5.20743	4.79173	6.08735	6.79371	6.63195	6.43615
Ms4a1	12482	AA960661|Cd20|Ly-44|Ms4a2	membrane-spanning 4-domains, subfamily A, member 1	2.28001	2.25404	3.55032	2.13638	3.25085	4.29729	5.45138	5.24853
Cd22	12483	A530093D23|Lyb-8|Lyb8	CD22 antigen	5.63756	6.98498	6.11666	5.82568	7.33831	7.58796	7.12945	7.60216
Cd28	12487	-	CD28 antigen	3.15448	4.40604	4.93734	3.27388	5.69142	5.13379	6.49868	5.83349
Cd33	12489	Siglec-3|gp67	CD33 antigen	7.38155	6.95448	7.0978	7.09057	7.05821	6.53433	6.12945	5.32653
Cd34	12490	AU040960	CD34 antigen	9.09379	8.00595	8.58797	7.93339	9.27322	9.44703	8.09907	8.67106
Cd36	12491	FAT|GPIV|Scarb3	CD36 antigen	7.57463	7.25404	7.80407	7.20677	7.99809	8.14814	7.56685	8.72965
Cd37	12493	Tspan26	CD37 antigen	8.01472	8.51874	8.14908	7.6568	9.10883	9.03296	8.97075	9.28317
Cd38	12494	ADPRC 1|Cd38-rs1|I-19	CD38 antigen	6.36747	6.01485	5.91597	5.6218	6.67232	6.24482	6.35184	6.364
Entpd1	12495	2610206B08Rik|AA408691|Cd39|NTPDase-1	ectonucleoside triphosphate diphosphohydrolase 1	8.57922	8.61354	8.35767	8.35941	9.31078	9.53159	8.53317	8.67106
Cd3d	12500	T3d	CD3 antigen, delta polypeptide	6.56541	7.43284	6.64429	5.88054	8.25085	7.59846	7.82989	7.80652
Cd3e	12501	AI504783|CD3|CD3epsilon|T3e	CD3 antigen, epsilon polypeptide	6.57769	6.64635	5.91597	5.52869	7.32614	6.75672	6.49868	5.77904
Cd3g	12502	Ctg-3|Ctg3|T3g	CD3 antigen, gamma polypeptide	7.67233	8.13668	7.1718	7.10447	8.22486	7.62948	7.58888	7.14469
Cd247	12503	4930549J05Rik|A430104F18Rik|AW552088|Cd3|Cd3-eta|Cd3-zeta|Cd3h|Cd3z|Cd3zeta|T3z|Tcrk|Tcrz	CD247 antigen	5.35326	6.11753	5.37344	5.06238	6.7289	6.13379	6.58888	6.47092
Cd4	12504	L3T4|Ly-4	CD4 antigen	6.44324	7.24398	6.11666	5.88054	7.30148	7.54522	6.75394	7.73681
Cd44	12505	AU023126|AW121933|AW146109|HERMES|Ly-24|Pgp-1	CD44 antigen	4.08736	4.54354	4.30931	4.09985	4.83581	3.94936	4.12945	4.88596
Cd48	12506	AI449234|AW610730|BCM1|BLAST|BLAST-1|BLAST1|Bcm-1|MEM-102|SLAMF2|Sgp-60	CD48 antigen	8.19489	8.06995	7.65723	7.48687	7.89471	7.5774	6.45138	7.22835
Cd5	12507	Ly-1|Ly-12|Ly-A|Lyt-1	CD5 antigen	6.21075	6.18214	5.37344	5.08123	6.65295	6.16236	5.63195	6.43615
Cd53	12508	AI323659|Ox-44|Tspan25	CD53 antigen	5.13799	4.60767	5.1718	4.83682	4.83581	4.73786	5.79241	5.16607
Cd6	12511	-	CD6 antigen	5.66083	6.74232	5.43484	5.22384	7.11592	7.16236	6.40247	7.123
Cd63	12512	C75951|ME491|Tspan30	CD63 antigen	12.784	12.616	12.7828	12.7412	13.2991	13.3966	12.7624	12.7664
Cd68	12514	Lamp4|Scard1|gp110	CD68 antigen	10.0685	9.86547	9.8929	10.0282	9.94334	10.2531	8.76365	9.3407
Cd69	12515	5830438K24Rik|AI452015|AIM|VEA	CD69 antigen	7.02596	7.30328	7.06904	7.06711	7.10171	6.5123	5.9368	5.93658
Cd7	12516	-	CD7 antigen	5.21861	6.01485	5.05933	5.00427	5.76542	6.32282	6.71441	6.24853
Cd79a	12518	Ig-alpha|Iga|Igalpha|Ly-54|Ly54|mb-1	CD79A antigen (immunoglobulin-associated alpha)	0.280009	1.40604	2.1718	1.39941	3.02846	2.48993	3.54449	3.0786
Cd80	12519	B71|Cd28l|Ly-53|Ly53|MIC17|TSA1	CD80 antigen	6.33167	6.19264	6.56412	6.47978	7.23791	7.11929	5.9368	6.93658
Cd81	12520	Tapa-1|Tapa1|Tspan28	CD81 antigen	11.9413	11.4572	11.9367	11.9311	11.7161	11.8259	11.2587	11.251
Cd83	12522	-	CD83 antigen	7.93106	8.3509	7.36558	8.01167	8.82288	8.79827	8.02022	8.32653
Cd84	12523	A130013D22Rik|CDw84|SLAMF5	CD84 antigen	8.36747	8.4548	8.40062	8.46729	8.58305	8.79827	8.27241	8.51323
Cd86	12524	B7|B7-2|B7.2|B70|CLS1|Cd28l2|ETC-1|Ly-58|Ly58|MB7|MB7-2|TS/A-2	CD86 antigen	7.76919	7.5312	7.2845	7.36904	7.7289	7.53433	6.12945	7.22835
Cd8a	12525	BB154331|Ly-2|Ly-35|Ly-B|Lyt-2	CD8 antigen, alpha chain	5.01697	5.47643	5.55032	4.6218	6.78335	5.73786	4.71441	5.24853
Cd8b1	12526	Cd8b|Ly-3|Ly-C|Lyt-3	CD8 antigen, beta chain 1	3.44993	4.08411	3.0198	2.81445	4.69142	4.39682	3.54449	4.24853
Cd9	12527	Tspan29	CD9 antigen	9.55225	8.89629	9.4273	9.45017	9.04712	8.69939	9.6213	8.71523
Cdk1	12534	Cdc2|Cdc2a|p34<CDC2>	cyclin-dependent kinase 1	2.94297	2.89147	3.65723	2.81445	2.76542	2.81186	4.54449	3.40053
Cdh1	12550	AA960649|E-cad|Ecad|L-CAM|UVO|Um	cadherin 1	6.16265	8.23386	6.56412	8.02146	7.84438	7.75672	10.2724	9.00934
Cdh5	12562	7B4|AA408225|Cd144|VE-Cad|VECD|VEcad|Vec	cadherin 5	7.48946	6.98498	7.64429	7.06711	8.43785	8.55602	7.42713	8.31701
Cdkn1a	12575	CAP20|CDKI|CIP1|Cdkn1|P21|SDI1|Waf1|mda6|p21Cip1|p21WAF	cyclin-dependent kinase inhibitor 1A (P21)	9.41101	9.77934	9.79532	10.0172	9.56762	9.8758	10.0363	9.58243
Cebpb	12608	C/EBPbeta|CRP2|IL-6DBP|LAP|LIP|NF-IL6|NF-M|Nfil6	CCAAT/enhancer binding protein (C/EBP), beta	8.53425	8.92016	8.89153	9.28612	8.92731	8.92872	9.17384	8.77904
Cfh	12628	Mud-1|NOM|Sas-1|Sas1	complement component factor h	7.65505	7.43726	6.29282	6.27388	6.83581	6.63968	6.29937	6.28806
Cfi	12630	-	complement component factor i	3.21861	3.40604	4.24219	3.56934	3.61342	4.07489	5.24493	3.40053
Chil3	12655	AI505981|Chi3l3|ECF-L|Ym1	chitinase-like 3	3.86497	4.21339	5.1718	4.94373	6.08735	7.53433	8.3389	8.68593
Chuk	12675	AI256658|Chuk1|Fbx24|Fbxo24|IKBKA|IKK1|Ikka|NFKBIKA	conserved helix-loop-helix ubiquitous kinase	8.82433	8.79147	8.87778	8.91116	8.90702	8.9162	8.67377	8.74394
Socs3	12702	Cis3|Cish3|EF-10|Ef10|SSI-3|Ssi3	suppressor of cytokine signaling 3	5.89472	5.94209	6.5778	6.54237	6.61342	7.01349	6.45138	6.69331
Socs1	12703	Cish1|Cish7|JAB|SOCS-1|SSI-1	suppressor of cytokine signaling 1	7.30976	7.31293	7.61143	7.44016	7.50959	7.80282	6.00392	6.66357
Clu	12759	AI893575|ApoJ|Cli|D14Ucla3|SP-40|Sgp-2|Sgp2|Sugp-2	clusterin	10.9221	9.53326	10.6056	10.4691	10.3353	10.0194	9.92819	9.78941
Cmah	12763	-	cytidine monophospho-N-acetylneuraminic acid hydroxylase	5.80357	6.51874	4.30931	4.3063	4.96706	5.65986	4.86641	6.53803
Cxcr2	12765	CD128|CDw128|Cmkar2|Gpcr16|IL-8Rh|IL-8rb|IL8RA|Il8rb|mIL-8RH	chemokine (C-X-C motif) receptor 2	2.39549	2.54354	2.84988	3.20677	4.61342	4.81186	5.9368	5.40053
Cxcr3	12766	Cd183|Cmkar3	chemokine (C-X-C motif) receptor 3	6.13799	6.41503	5.73252	4.85884	6.99809	6.48993	6.24493	6.98549
Cxcr4	12767	CD184|Cmkar4|LESTR|PB-CKR|PBSF/SDF-1|Sdf1r|b2b220Clo	chemokine (C-X-C motif) receptor 4	7.93106	7.55985	7.70162	7.80597	8.29525	8.16236	6.71441	7.79285
Ccr1	12768	Cmkbr1|Mip-1a-R	chemokine (C-C motif) receptor 1	7.07875	5.45915	7.1445	7.12733	6.69142	6.98179	5.54449	5.93658
Ccr9	12769	A130091K22Rik|Cmkbr10|GPR-9-6	chemokine (C-C motif) receptor 9	4.92387	4.57596	3.93734	3.6218	4.90293	4.39682	3.86641	4.40053
Ccr3	12771	CC-CKR3|CKR3|Cmkbr1l2|Cmkbr3	chemokine (C-C motif) receptor 3	2.69505	1.08411	3.0198	0.814448	2.02846	2.48993	2.54449	3.88596
Ccr2	12772	Cc-ckr-2|Ccr2a|Ccr2b|Ckr2|Ckr2a|Ckr2b|Cmkbr2|mJe-r	chemokine (C-C motif) receptor 2	8.96768	9.1636	8.50809	8.37669	8.68667	8.64475	8.487	8.35473
Ccr4	12773	C-C CKR-4|CHEMR1|Cmkbr4|LESTR|Sdf1r	chemokine (C-C motif) receptor 4	3.01698	4.36951	3.75677	3.76864	5.25085	5.13379	6.06805	5.40053
Ccr5	12774	AM4-7|CD195|Cmkbr5	chemokine (C-C motif) receptor 5	8.22057	8.68216	8.68593	8.4365	8.48789	8.77995	7.63195	8.15542
Ccr7	12775	CC-CKR-7|CCR-7|CD197|Cdw197|Cmkbr7|EBI1|Ebi1h	chemokine (C-C motif) receptor 7	5.94297	6.00297	5.24219	5.20677	7.60337	7.83866	6.54449	7.26843
Ccr8	12776	C-C|C-C CKR-8|CC-CKR-8|CCR-8|CKR-8|Cmkbr8|mCCR8	chemokine (C-C motif) receptor 8	3.94297	4.57596	4.70786	4.27388	5.30148	5.69939	6.24493	6.53803
Camp	12796	CAP18|Cnlp|Cramp|FALL39|MCLP	cathelicidin antimicrobial peptide	1.28001	1.40604	1.43484	1.6218	2.4435	2.0749	4.12945	2.66357
Col3a1	12825	AW550625|Col3a-1|MMS10-W|Ms10w|mKIAA4231	collagen, type III, alpha 1	14.4557	13.5957	12.931	13.278	13.8112	13.5043	11.2327	11.8608
Col4a1	12826	Bru|Col4a-1|Del(8)44H|Raw|Svc	collagen, type IV, alpha 1	8.91422	9.09953	9.41973	9.05166	10.3459	10.5178	10.1219	10.414
Col1a1	12842	Col1a-1|Cola-1|Cola1|Mov-13|Mov13	collagen, type I, alpha 1	15.0584	15.28	14.6726	14.5246	15.5034	15.4076	13.9387	14.3544
Cr2	12902	C3DR|CD21|CD35|Cr-1|Cr-2|Cr1	complement receptor 2	3.55303	3.991	3.55032	2.90191	4.02846	3.81186	3.54449	3.66357
Creb1	12912	2310001E10Rik|3526402H21Rik|AV083133|Creb|Creb-1	cAMP responsive element binding protein 1	7.46983	7.20823	6.82716	7.47623	6.91923	7.21785	7.21691	6.364
Crebbp	12914	AW558298|CBP|CBP/p300|KAT3A|p300/CBP	CREB binding protein	9.21075	9.2211	8.99708	9.29524	9.0247	9.30371	8.73431	8.79285
Crp	12944	AI255847	C-reactive protein, pentraxin-related	2.39549	2.66907	2.84988	1.6218	3.61342	3.0749	3.86641	3.66357
Dmbt1	12945	CRP|CRP-[a]|CRP-[b]|Crpd|DBMT1|gp300|p80	deleted in malignant brain tumors 1	1.5024	0.669074	-0.150124	1.39941	7.49878	4.07489	3.12945	3.40053
Csf1	12977	C87615|Csfm|MCSF|op	colony stimulating factor 1 (macrophage)	10.2687	9.59784	10.6089	10.0552	9.38013	8.84308	7.90204	8.44492
Csf1r	12978	AI323359|CD115|CSF-1R|Csfmr|Fim-2|Fms|M-CSF-R|M-CSFR	colony stimulating factor 1 receptor	11.1493	10.9625	10.84	10.8643	10.8337	10.8287	9.60518	10.0357
Csf2	12981	Csfgm|GMCSF|Gm-CSf|MGI-IGM	colony stimulating factor 2 (granulocyte-macrophage)	3.39549	2.991	3.1718	3.13638	4.53096	5.24482	4.86641	4.24853
Csf2rb	12983	AI848964|AIC2B|Bc|CDw131|Csf2rb1|Csfgmrb|Il3r|Il3rb|Il3rb1|Il5rb	colony stimulating factor 2 receptor, beta, low-affinity (granulocyte-macrophage)	7.85995	8.68774	8.11197	7.99932	9.77665	10.0973	9.94963	9.91781
Csf3	12985	Csfg|G-CSF|MGI-IG	colony stimulating factor 3 (granulocyte)	1.5024	1.89147	3.75677	0.814448	4.14394	3.81186	5.45138	4.53803
Csf3r	12986	Cd114|Csfgr|G-CSF-R|G-CSFR	colony stimulating factor 3 receptor (granulocyte)	6.20284	7.00892	6.25927	6.56934	6.61342	6.44413	5.00392	5.77904
Ctsg	13035	CatG|VSP	cathepsin G	1.69505	0.669074	1.43484	0.814448	1.4435	2.0749	3.54449	2.0786
Ctsh	13036	AL022844	cathepsin H	9.12026	9.9003	9.26773	9.14088	9.97877	10.0407	9.78289	10.2207
Ctsl	13039	1190035F06Rik|CatL|Ctsl1|MEP|fs|nkt	cathepsin L	8.06355	8.49562	7.59134	7.98187	7.84438	7.94936	7.91952	8.48799
Ctss	13040	Cats	cathepsin S	13.0894	12.3839	12.8571	12.6319	12.2862	11.8175	9.487	10.7134
Ctsw	13041	lymphopain	cathepsin W	7.21075	7.72797	7.33369	6.77445	7.62341	7.62948	7.18834	7.66357
Cx3cr1	13051	-	chemokine (C-X3-C motif) receptor 1	10.5507	10.5456	10.6621	10.4209	9.89058	9.93288	9.56129	9.15006
Cybb	13058	C88302|CGD91-phox|Cgd|Cyd|Nox2|gp91-1|gp91phox	cytochrome b-245, beta polypeptide	10.7655	10.4581	10.3734	10.1565	10.6542	10.1046	7.97075	9.43615
Cd55	13136	Daf|Daf-GPI|Daf1|GPI-DAF	CD55 molecule, decay accelerating factor for complement	5.13799	5.1502	3.84988	4.24071	5.4435	5.81186	6.58888	6.0786
Defb1	13214	AW260221|BD-1	defensin beta 1	3.21861	6.25404	3.30931	4.88054	4.83581	4.5774	6.79241	6.53803
Dpp4	13482	Cd26|Dpp-4|THAM	dipeptidylpeptidase 4	5.9045	6.47643	4.89427	4.74519	5.65295	5.98179	6.40247	6.28806
Egfr	13649	9030024J15Rik|AI552599|Erbb|Errb1|Errp|Wa5|wa-2|wa2	epidermal growth factor receptor	7.4566	8.3415	7.40446	7.46191	7.76542	8.08985	8.49868	8.37322
Egr1	13653	A530045N19Rik|ETR103|Egr-1|Krox-1|Krox-24|Krox24|NGF1-A|NGFI-A|NGFIA|TIS8|Zenk|Zfp-6|Zif268|egr	early growth response 1	8.75574	8.77411	9.13065	9.32422	8.38013	8.49556	8.85737	8.51323
Egr2	13654	Egr-2|Krox-20|Krox20|NGF1-B|Zfp-25|Zfp-6	early growth response 2	3.94297	5.47643	4.1718	4.90191	6.35039	6.44413	7.81127	7.24853
Egr3	13655	Pilot	early growth response 3	4.86497	7.23386	5.37344	6.36134	4.90293	5.24482	8.68404	6.32653
Elk1	13712	Elk-1	ELK1, member of ETS oncogene family	3.69505	4.17157	3.65723	4.4583	4.53096	5.39682	4.86641	4.98549
Adgre1	13733	DD7A5-7|EGF-TM7|Emr1|F4/80|Gpf480|Ly71|TM7LN3	adhesion G protein-coupled receptor E1	10.5883	10.2339	10.3527	9.99	9.42649	9.28435	7.75394	8.33599
Eng	13805	AI528660|AI662476|CD105|Endo|S-endoglin	endoglin	8.09806	8.02663	8.40446	7.66932	8.73812	9.04835	7.97075	8.67852
Eomes	13813	C77258|TBR-2|Tbr2	eomesodermin homolog (Xenopus laevis)	4.78251	5.23386	4.0978	3.72134	5.02846	5.53433	5.63195	4.98549
Erbb2	13866	Erbb-2|HER-2|HER2|Neu|c-erbB2|c-neu|mKIAA3023	v-erb-b2 erythroblastic leukemia viral oncogene homolog 2, neuro/glioblastoma derived oncogene homolog (avian)	7.24194	8.06995	7.8555	8.1742	8.02093	8.08985	9.38998	8.7651
Ewsr1	14030	Ews|Ewsh	Ewing sarcoma breakpoint region 1	9.71394	9.91621	10.0022	9.89593	9.89677	9.85625	9.85282	9.93658
F2rl1	14063	Gpcr11|PAR-2|Par2	coagulation factor II (thrombin) receptor-like 1	6.0349	6.13939	6.11666	5.90191	4.35039	5.81186	7.49868	6.32653
Fadd	14082	Mort1/FADD	Fas (TNFRSF6)-associated via death domain	5.20284	4.86547	4.84988	5.1543	5.61342	5.29729	5.45138	5.47092
Fap	14089	SIMP	fibroblast activation protein	5.93345	5.8523	5.13528	4.83682	4.61342	5.44413	4.86641	5.40053
Fas	14102	AI196731|APO1|APT1|CD95|TNFR6|Tnfrsf6|lpr	Fas (TNF receptor superfamily member 6)	8.12967	7.45043	7.99453	8.23019	8.10883	8.02131	7.69423	7.77904
Fasl	14103	APT1LG1|CD178|CD95-L|CD95L|Fas-L|Faslg|Tnfsf6|gld	Fas ligand (TNF superfamily, member 6)	3.39549	4.54354	3.75677	3.39941	4.69142	4.48993	4.71441	4.0786
Fcer1a	14125	FcERI|Fce1a|Fcr-5|fcepsilonri	Fc receptor, IgE, high affinity I, alpha polypeptide	2.86497	2.991	3.43484	2.90191	4.02846	4.07489	5.71441	5.16607
Ms4a2	14126	FcRB|Fce1b|Fcer1b|Fcrbeta|Ms4a1|fcERI	membrane-spanning 4-domains, subfamily A, member 2	3.08736	2.25404	2.65723	2.51489	3.4435	3.94936	3.54449	4.24853
Fcer1g	14127	AI573376|CD23|FcR-gamma|FcR[g]|FcRgamma|Fce1g|FcepsilonRI|Ly-50	Fc receptor, IgE, high affinity I, gamma polypeptide	9.77253	10.0148	9.85269	9.58759	9.4006	9.48429	8.47522	8.75103
Fcer2a	14128	CD23|Fce2|Fcer2|Ly-42	Fc receptor, IgE, low affinity II, alpha polypeptide	0.695047	1.40604	-0.150124	0.814448	2.4435	3.29729	2.54449	1.0786
Fcgr1	14129	AI323638|AV092959|CD64|FcgammaRI|IGGHAFC	Fc receptor, IgG, high affinity I	9.66155	9.07563	9.81277	9.44107	8.52565	8.25812	6.58888	7.40053
Fcgr2b	14130	AI528646|CD32|F630109E10Rik|Fc[g]RII|FcgRII|Fcgr2|Fcgr2a|Fcr-2|Fcr-3|Ly-17|Ly-m20|LyM-1|Lym-1|fcRII	Fc receptor, IgG, low affinity IIb	11.4799	10.4178	10.9545	11.4829	11.4988	11.3695	9.64777	10.256
Fcgr3	14131	CD16	Fc receptor, IgG, low affinity III	8.53582	7.63486	8.05933	8.10907	8.09455	7.82085	4.71441	6.16607
Flt3	14255	B230315G04|CD135|Flk-2|Flk2|Flt-3|Ly72|wmfl	FMS-like tyrosine kinase 3	4.12131	3.78455	3.1718	3.27388	4.35039	3.94936	4.12945	3.88596
Flt3l	14256	Flt3lg|Ly72L	FMS-like tyrosine kinase 3 ligand	5.92387	6.3415	6.1718	6.03362	6.65295	6.89932	6.40247	7.05588
Fn1	14268	E330027I09|Fn|Fn-1	fibronectin 1	14.7046	14.0868	15.0688	15.3793	15.1665	15.5324	14.2667	14.5599
Fos	14281	D12Rfj1|c-fos|cFos	FBJ osteosarcoma oncogene	7.15037	7.47643	7.4865	7.84787	7.50959	7.79371	7.32585	7.97342
Fpr2	14289	E330010I07Rik|Fpr-rs2	formyl peptide receptor 2	6.1129	6.17157	6.41973	5.35361	5.96706	5.07489	4.12945	5.24853
Fut7	14347	AI853193|FTVII|Fuc-TVII|FucT-VII	fucosyltransferase 7	3.9045	4.89147	4.55032	4.06238	5.08735	5.24482	5.45138	5.47092
Fyn	14360	AI448320|AW552119	Fyn proto-oncogene	8.78118	9.04266	8.81277	8.67398	9.23466	9.47007	8.4393	9.23342
Gata3	14462	Gata-3|jal	GATA binding protein 3	6.67233	8.37413	6.46459	7.93598	8.71028	8.50674	9.8754	8.75103
Gbp2b	14468	Gbp-1|Gbp1|Mag-1|Mpa-1|Mpa1	guanylate binding protein 2b	6.91905	7.60767	7.00975	6.91248	7.60337	7.69939	6.29937	7.32653
Gfi1	14581	AW495828|Gfi-1|Pal-1|Pal1	growth factor independent 1	3.21861	4.17157	3.43484	3.20677	4.53096	5.13379	5.45138	5.53803
Glycam1	14663	MC26|Sgp50|glyCAM-1	glycosylation dependent cell adhesion molecule 1	2.28001	2.40604	2.43484	1.6218	2.4435	4.48993	4.12945	4.53803
Cmklr1	14747	ChemR23|DEZ|Gpcr27|mcmklr1	chemokine-like receptor 1	8.17685	8.3509	8.1445	8.1543	8.92731	9.04452	8.32584	8.70796
Gpi1	14751	Amf|Gpi|Gpi-1|Gpi-1r|Gpi-1s|Gpi-1t|Gpi1-r|Gpi1-s|Gpi1-t|Gpi1s|MF|NK|NK/GPI|Nlk|Org|Pgi|Phi	glucose phosphate isomerase 1	11.0573	10.3111	10.8435	11.326	10.2795	10.3323	10.1775	9.97645
Ptgdr2	14764	Crth2|Gpr44|Grp45	prostaglandin D2 receptor 2	5.24853	2.86497	1.5024	2.991	2.25404	3.75677	3.1718	4.66357
Cxcl1	14825	Fsp|Gro1|KC|Mgsa|N51|Scyb1|gro	chemokine (C-X-C motif) ligand 1	4.21861	4.57596	4.80407	4.06238	5.08735	5.29729	4.86641	4.98549
Gzma	14938	AW494114|Ctla-3|Ctla3|Hf|SE1|TSP-1|TSP1	granzyme A	5.56541	7.12851	5.46459	5.42916	5.93535	6.37258	6.79241	5.93658
Gzmb	14939	AI553453|CCP-1/C11|CCP1|Ctla-1|Ctla1|GZB	granzyme B	5.20284	6.59981	5.37344	5.68481	5.7289	5.19037	4.12945	5.0786
Gzmk	14945	-	granzyme K	0.695047	2.78455	1.84988	0.399411	3.61342	3.0749	2.54449	3.88596
H2-Aa	14960	Aalpha|H-2Aa|H2Aa|I-Aalpha|IAalpha|Ia-1|Ia1	histocompatibility 2, class II antigen A, alpha	15.0554	14.7209	14.2467	14.1581	14.7227	14.3803	12.624	13.1349
H2-Ab1	14961	AI845868|Abeta|H-2Ab|H2-Ab|I-Abeta|IAb|Ia-2|Ia2|Rmcs1	histocompatibility 2, class II antigen A, beta 1	13.8039	13.8728	13.3381	12.9807	14.3895	14.0541	13.306	13.929
Cfb	14962	AI195813|AI255840|B|Bf|C2|Fb|H2-Bf	complement factor B	9.14316	8.87201	9.09067	8.55423	8.15086	7.33542	5.86641	6.83349
H2-D1	14964	H-2D|H2-D	histocompatibility 2, D region locus 1	14.5805	14.5423	14.6224	14.506	14.706	14.7043	13.7748	14.0315
H2-Eb1	14969	Eb|H-2Eb|H2Eb|Ia-4|Ia4	histocompatibility 2, class II antigen E beta	6.89472	8.03248	6.8611	6.56934	8.69616	8.97777	8.67377	8.94897
H2-K1	14972	H-2K|H-2K(d)|H2-K|K-f	histocompatibility 2, K1, K region	13.0612	13.0319	13.0877	12.9871	13.0912	13.0245	12.2371	12.5001
H2-M3	14991	H-2M3|Hmt|M3a|MuprM3|MuprM301|MuprM302|R4B2	histocompatibility 2, M region locus 3	7.84225	7.95448	7.81566	7.93598	7.80982	8.06736	7.40247	7.80652
H2-DMa	14998	H-2Ma|H2-Ma	histocompatibility 2, class II, locus DMa	9.88549	10.4946	9.65401	9.59908	10.5481	10.7742	9.59977	9.89238
H2-DMb1	14999	AI385589|H-2Mb1|H2-Mb1	histocompatibility 2, class II, locus Mb1	4.30976	4.33204	3.75677	3.39941	4.4435	5.13379	5.24493	3.0786
H2-DMb2	15000	H-2Mb2|H2-Mb2	histocompatibility 2, class II, locus Mb2	6.54054	6.17157	5.99962	5.73331	6.98266	6.44413	5.35184	5.83349
H2-Ob	15002	A-beta-2|A-beta2|H-2Ab|H-2I|H-2Ob|H2-Ab|H2-Ab2|H2-IAb2|Ob	histocompatibility 2, O region beta locus	4.47641	5.87853	5.63124	4.72134	6.19838	6.32282	7.29937	6.40053
H2-Q1	15006	H-2Q1|Q1|Q1b|Q1d|Q1k|Qa-1|Qa1|Qed-1	histocompatibility 2, Q region locus 1	2.28001	1.66907	2.84988	1.39941	4.02846	3.29729	4.35184	3.88596
H2-Q10	15007	H-2Q10|Q10|Qa10	histocompatibility 2, Q region locus 10	3.15448	2.40604	4.30931	2.81445	4.35039	4.65986	5.79241	4.40053
H2-Q2	15013	BE136769|ENSMUSG00000079507|Gm11132|H-2Q2|gs14-2	histocompatibility 2, Q region locus 2	2.94297	3.78455	4.30931	3.27388	5.80105	5.65986	6.24493	6.123
H2-T23	15040	37b|37c|H-2T23|H2-Qa1|Qa-1|Qa-1(b)|Qa1|Qed-1|T18c|T18c(37)|T23b|T23d	histocompatibility 2, T region locus 23	9.54289	10.0274	9.92402	9.64813	10.2379	10.1606	9.8345	10.087
Ifi44l	15061	H-28|H28|H28-1|NS1178	interferon-induced protein 44 like	2.5024	2.66907	-0.150124	2.13638	2.02846	2.81186	3.12945	1.0786
Mr1	15064	H2ls	major histocompatibility complex, class I-related	8.3371	6.997	7.76874	7.99932	7.87812	7.62948	6.35184	6.32653
H60a	15101	H60	histocompatibility 60a	7.21861	6.7776	7.4865	7.4655	7.33831	7.4088	7.09907	7.00934
Hc	15139	C5|C5a|He	hemolytic complement	1.86497	3.17157	2.65723	1.6218	4.25085	3.48993	3.86641	5.32653
Hck	15162	AI849071|Bmk	hemopoietic cell kinase	7.53425	8.01485	7.58459	7.32224	7.50959	7.62948	6.9368	7.70796
Foxj1	15223	FKHL-13|HFH-4|Hfh4	forkhead box J1	2.28001	1.66907	1.84988	0.399411	3.02846	2.0749	2.54449	2.0786
Hif1a	15251	AA959795|HIF-1-alpha|HIF1-alpha|HIF1alpha|MOP1|bHLHe78	hypoxia inducible factor 1, alpha subunit	10.4931	9.88096	10.1037	10.1987	9.96902	9.90779	9.25873	9.05015
Mnx1	15285	HB9|Hlxb9|MNR2	motor neuron and pancreas homeobox 1	2.01698	1.08411	1.43484	0.399411	3.02846	3.48993	3.54449	3.40053
Hmgb1	15289	HMG-1|Hmg1|SBP-1|p30	high mobility group box 1	8.98391	8.59191	8.40446	8.62019	8.38013	8.25148	8.11434	7.16607
Hras	15461	H-ras|Ha-ras|Harvey-ras|Hras-1|Hras1|Kras2|c-H-ras|c-Ha-ras|c-rasHa|ras	Harvey rat sarcoma virus oncogene	2.86497	3.78455	4.43484	4.13638	4.90293	4.88225	5.9368	5.0786
Hsd11b1	15483	-	hydroxysteroid 11-beta dehydrogenase 1	7.64924	8.19525	7.68908	7.54916	8.6084	10.0096	9.0283	9.59035
Icam1	15894	CD54|Icam-1|Ly-47|MALA-2	intercellular adhesion molecule 1	7.39201	7.51874	7.75677	6.91248	8.10883	7.62948	6.71441	7.28806
Icam2	15896	CD102|Icam-2|Ly-60	intercellular adhesion molecule 2	6.55923	6.69144	7.11666	6.12733	7.65295	7.79371	6.82989	7.00934
Irf8	15900	AI893568|ICSBP|IRF-8|Icsbp1|Myls	interferon regulatory factor 8	8.49271	8.83733	8.08828	8.1296	8.85712	9.07865	7.90204	8.61776
Ido1	15930	Ido|Indo	indoleamine 2,3-dioxygenase 1	3.44993	3.40604	4.0978	3.72134	8.10171	7.32282	5.45138	4.77904
Cxcl10	15945	C7|CRG-2|INP10|IP-10|IP10|Ifi10|Scyb10|gIP-10|mob-1	chemokine (C-X-C motif) ligand 10	10.1939	11.0999	10.9901	10.5304	11.5116	11.5234	10.977	11.5982
Ifit1	15957	ISG56|Ifi56|P56	interferon-induced protein with tetratricopeptide repeats 1	8.98737	8.32252	9.19195	8.42547	7.55202	7.07489	5.79241	6.91149
Ifit2	15958	AV302338|Ifi54|P54	interferon-induced protein with tetratricopeptide repeats 2	9.26964	9.1326	9.44793	9.26875	8.54678	8.19037	7.40247	8.05588
Ifit3	15959	Ifi49|P49	interferon-induced protein with tetratricopeptide repeats 3	10.0416	10.8577	10.8257	10.5672	9.97877	10.0843	9.82989	10.2832
Ifna1	15962	Ifa1	interferon alpha 1	1.86497	2.08411	4.1718	1.98437	3.02846	4.07489	5.35184	4.98549
Ifna2	15965	Ifa2	interferon alpha 2	1.5024	2.54354	3.0198	1.98437	3.61342	3.94936	3.12945	4.0786
Ifna4	15967	Ifa4	interferon alpha 4	2.28001	2.78455	3.84988	1.6218	4.4435	3.48993	5.12945	4.0786
Ifnar1	15975	CD118|Ifar|Ifnar|Ifrc|Infar	interferon (alpha and beta) receptor 1	9.60943	9.70891	9.47923	9.39565	10.0038	9.9308	9.64777	9.81331
Ifnar2	15976	AI747302|Ifnar-2	interferon (alpha and beta) receptor 2	8.69927	8.3057	8.4083	8.18731	8.31386	8.28435	7.54449	7.88596
Ifnb1	15977	IFN-beta|IFNB|Ifb	interferon beta 1, fibroblast	2.28001	2.78455	2.65723	2.13638	3.02846	1.48993	3.12945	3.0786
Ifng	15978	IFN-g|Ifg	interferon gamma	2.94297	4.69882	4.0978	3.51489	5.02846	4.5774	4.71441	5.47092
Ifngr1	15979	CD119|IFN-gammaR|Ifgr|Ifngr|Nktar	interferon gamma receptor 1	10.1555	10.1023	9.79824	9.72434	10.2968	10.2348	9.58888	9.73324
Cd79b	15985	B29|Ig-beta|Igb|Igbeta	CD79B antigen	5.15448	4.47643	4.70786	4.54237	3.76542	4.48993	3.54449	2.0786
Igf1r	16001	A330103N21Rik|CD221|D930020L01|IGF-1R|hyft	insulin-like growth factor I receptor	7.8397	8.10648	8.33772	8.51835	8.27005	8.50116	8.79241	8.27827
Igf2r	16004	AI661837|CD222|CI-MPR|M6P/IGF2R|Mpr300	insulin-like growth factor 2 receptor	8.01246	8.2764	8.28033	7.97432	8.1646	8.37258	7.52177	7.94897
Igll1	16136	BB139905|Igl-5|Igll|Lambda5	immunoglobulin lambda-like polypeptide 1	1.69505	2.40604	2.84988	2.13638	3.4435	2.48993	3.12945	2.66357
Cd74	16149	CLIP|DHLAG|HLADG|Ia-GAMMA|Ii	CD74 antigen (invariant polypeptide of major histocompatibility complex, class II antigen-associated)	15.0123	15.01	14.6367	14.3484	15.2221	14.9305	13.6789	14.2972
Ikbkb	16150	AI132552|IKK-2|IKK-beta|IKK2|IKK[b]|IKKbeta	inhibitor of kappaB kinase beta	8.47968	8.48072	8.38903	8.47087	8.93935	8.64475	8.68404	8.50487
Ikbkg	16151	1110037D23Rik|AI848108|AI851264|AW124339|IKK[g]|NEMO	inhibitor of kappaB kinase gamma	6.27248	6.31293	6.30931	6.41436	6.99809	6.9162	7.24493	6.83349
Il10	16153	CSIF|Il-10	interleukin 10	3.64924	2.66907	3.0198	2.13638	3.25085	4.19037	2.54449	4.40053
Il10ra	16154	AW553859|CDw210|CDw210a|Il10r|mIL-10R	interleukin 10 receptor, alpha	8.36924	8.7776	8.36951	8.04567	8.62341	8.29729	7.27241	8.08983
Il11	16156	IL-11	interleukin 11	2.60194	1.89147	3.1718	1.98437	3.02846	2.81186	3.12945	3.66357
Il11ra1	16157	AI314697|GP130|Il-11ra|Il11ra|Il11ra2|NR1	interleukin 11 receptor, alpha chain 1	5.48946	6.1502	5.24219	4.59581	6.05821	6.21785	6.63195	6.40053
Il12a	16159	IL-12p35|Il-12a|Ll12a|p35	interleukin 12a	2.01698	1.66907	3.1718	2.72134	3.90293	4.07489	5.35184	4.40053
Il12b	16160	Il-12b|Il-12p40|Il12p40|p40	interleukin 12b	5.07009	5.27394	4.43484	3.85884	6.39769	6.34791	4.86641	6.40053
Il12rb1	16161	CD212|IL-12R[b]	interleukin 12 receptor, beta 1	4.42297	6.21339	5.65723	5.04327	6.05821	6.55602	6.29937	6.364
Il12rb2	16162	A930027I18Rik|IL-12RB2|Ifnm	interleukin 12 receptor, beta 2	3.55303	4.94209	3.75677	4.6218	4.90293	5.24482	6.58888	5.88596
Il13	16163	Il-13	interleukin 13	1.69505	2.991	3.75677	2.98437	3.76542	5.39682	6.24493	4.88596
Il13ra1	16164	AI882074|CD213a1|IL-13R-alpha-1|IL-13r[a]|Il13ra|NR4	interleukin 13 receptor, alpha 1	9.61242	8.83733	9.22492	9.52698	9.17482	8.82085	8.52176	8.123
Il13ra2	16165	CD213a2|IL-13R-alpha-2	interleukin 13 receptor, alpha 2	2.78251	2.40604	2.43484	3.27388	4.02846	4.39682	5.00392	4.24853
Il15	16168	AI503618|IL-15	interleukin 15	5.13799	5.25404	5.5778	5.24071	5.02846	5.48993	5.35184	5.83349
Il15ra	16169	AA690181|IL-15RA	interleukin 15 receptor, alpha chain	6.00793	6.61549	6.22492	6.09057	6.53096	6.71875	6.12945	6.69331
Il16	16170	mKIAA4048	interleukin 16	6.46323	6.47643	6.24219	5.82568	6.42078	6.65986	6.49868	6.0786
Il17a	16171	Ctla-8|Ctla8|IL-17|IL-17A|Il17	interleukin 17A	2.28001	1.08411	1.84988	1.13638	0.443497	3.0749	2.54449	3.88596
Il17ra	16172	AW538159|Cdw217|Il17r|VDw217	interleukin 17 receptor A	7.63168	7.06711	7.73252	7.25324	7.26368	6.82978	6.18834	6.75103
Il18	16173	Igif|Il-18	interleukin 18	7.01697	6.59981	6.8833	7.49393	6.98266	6.99773	8.7733	6.16607
Il18rap	16174	AcPL|IL-18R-beta|IL-18RAcP|IL-18Rbeta|IL-1RAcPL	interleukin 18 receptor accessory protein	5.80357	6.45043	6.15366	5.74519	6.46586	6.9162	5.24493	6.50487
Il1a	16175	Il-1a	interleukin 1 alpha	2.28001	3.60767	-0.150124	3.72134	5.02846	4.65986	5.9368	4.40053
Il1b	16176	IL-1beta|Il-1b	interleukin 1 beta	6.17886	6.12851	5.82716	6.39188	7.08735	6.75672	5.63195	5.93658
Il1r1	16177	CD121a|CD121b|IL-1R1|IL-iR|Il1r-1	interleukin 1 receptor, type I	8.06791	8.53944	8.1763	8.02634	8.52565	9.00563	8.89321	8.5943
Il1r2	16178	CD121b|Il1r-2	interleukin 1 receptor, type II	3.55303	3.72797	4.49373	4.20677	4.76542	5.07489	7.00392	3.88596
Irak1	16179	AA408924|IRAK|IRAK-1|IRAK1-S|IRAK1b|Il1rak|Plpk|mPLK	interleukin-1 receptor-associated kinase 1	7.97582	7.92016	7.84988	7.94373	8.05083	8.13379	7.79241	7.94897
Il1rap	16180	6430709H04Rik|AI255955|AV239853|IL-1RAcP	interleukin 1 receptor accessory protein	7.0349	7.22877	7.34173	7.44744	6.80105	7.54522	7.27241	7.14469
Il1rn	16181	F630041P17Rik|IL-1ra	interleukin 1 receptor antagonist	7.27248	7.08974	6.80407	7.46191	7.4435	7.11929	7.65301	6.75103
Il18r1	16182	Il18ralpha|Il1rrp	interleukin 18 receptor 1	6.47641	6.74945	6.25927	5.954	7.80105	6.63968	6.67377	7.26843
Il2	16183	Il-2	interleukin 2	2.5024	3.40604	2.65723	2.39941	4.14394	3.94936	3.54449	3.0786
Il2ra	16184	CD25|Il2r|Ly-43	interleukin 2 receptor, alpha chain	7.42297	7.45915	7.05933	6.69097	8.02093	7.53433	6.00392	7.32653
Il2rb	16185	CD122|IL-15Rbeta|IL15Rbeta|Il-2/15Rbeta|Il-2Rbeta|p70	interleukin 2 receptor, beta chain	8.72019	10.5389	9.78651	9.42732	10.9019	11.2153	11.7169	11.4284
Il2rg	16186	CD132|[g]c|gamma(c)|gc|p64	interleukin 2 receptor, gamma chain	8.32804	9.28378	8.55723	8.30028	9.2314	9.43538	8.69423	8.8268
Il3	16187	BPA|Csfmu|HCGF|Il-3|MCGF|PSF	interleukin 3	1.5024	1.40604	0.849876	1.98437	2.4435	3.48993	2.54449	2.66357
Il3ra	16188	CD123|CDw123|SUT-1	interleukin 3 receptor, alpha chain	6.94771	8.00298	7.34972	6.94887	8.17142	8.60367	8.58888	8.16607
Il4	16189	BSF-1|Il-4	interleukin 4	1.5024	1.40604	0.849876	1.39941	2.76542	2.0749	2.54449	3.40053
Il4ra	16190	CD124|Il4r	interleukin 4 receptor, alpha	8.97117	9.25153	9.37344	9.21639	9.56762	9.94936	9.09907	9.17663
Il5	16191	Il-5	interleukin 5	1.5024	2.991	2.84988	2.39941	3.90293	3.81186	4.86641	4.0786
Il5ra	16192	CD125|CDw125|Il5r	interleukin 5 receptor, alpha	1.69505	3.08411	1.84988	1.6218	3.4435	3.65986	4.12945	3.66357
Il6	16193	Il-6	interleukin 6	3.64924	3.40604	3.75677	3.76864	4.69142	4.88225	4.71441	4.88596
Il6ra	16194	CD126|IL-6R|IL-6R-alpha|IL-6RA|Il6r	interleukin 6 receptor, alpha	7.98737	8.9483	8.3134	8.45469	8.99424	9.44413	9.98743	9.27827
Il6st	16195	5133400A03Rik|AA389424|BB405851|CD130|D13Ertd699e|gp130	interleukin 6 signal transducer	8.24194	8.3249	8.45721	8.34583	8.80982	9.10096	8.92819	8.85996
Il7	16196	A630026I06Rik|Il-7|hlb368	interleukin 7	2.78251	2.991	3.84988	3.20677	3.4435	3.48993	4.35184	4.24853
Il7r	16197	CD127|IL-7Ralpha	interleukin 7 receptor	6.46323	6.51038	5.99962	6.31429	7.83581	7.82978	7.52177	8.17663
Il9	16198	Il-9|P40	interleukin 9	1.5024	1.40604	-0.150124	1.6218	3.02846	3.29729	1.54449	3.40053
Ilf3	16201	MBII-26|MPHOSPH4|NF90|NFAR	interleukin enhancer binding factor 3	7.79833	7.55985	7.83856	7.40691	7.50959	7.28435	6.86641	7.18713
Inpp5d	16331	SHIP|SHIP-1|SHIP1|SIP-145|p150Ship|s-SHIP	inositol polyphosphate-5-phosphatase D	7.5024	7.30328	7.41212	7.31827	7.10171	6.9162	5.79241	6.47092
Irf1	16362	AU020929|Irf-1	interferon regulatory factor 1	10.3855	10.4373	10.641	10.5826	10.8207	10.6674	9.78289	10.4295
Irf2	16363	9830146E22Rik|AI646973|Irf-2	interferon regulatory factor 2	8.38505	8.57396	8.62137	8.37287	8.98266	8.75672	8.69423	8.83349
Irf4	16364	AI385587|IRF-4|LSIRF|Spip	interferon regulatory factor 4	4.64924	5.38789	3.65723	3.27388	6.22486	6.39682	5.54449	6.0328
Itch	16396	6720481N21Rik|8030492O04Rik|A130065M08|AIP4|C230047C07Rik	itchy, E3 ubiquitin protein ligase	9.63389	9.78195	9.59303	9.77807	9.85289	9.82532	10.1665	9.79628
Itga2	16398	CD49B|DX5	integrin alpha 2	5.43651	5.45915	5.55032	5.18949	5.02846	5.29729	6.40247	5.60216
Itga2b	16399	AI172977|CD41|CD41B|GpIIb|alphaIIb	integrin alpha 2b	2.01698	2.991	3.55032	3.27388	3.90293	3.29729	4.71441	3.88596
Itga4	16401	CD49D|Itga4B	integrin alpha 4	3.98045	4.51038	4.0978	4.20677	4.14394	3.81186	4.12945	4.24853
Itga5	16402	Cd49e|Fnra|VLA5	integrin alpha 5 (fibronectin receptor alpha)	8.61242	7.65397	8.81566	8.79887	8.29525	8.18342	6.9368	7.40053
Itga6	16403	5033401O05Rik|AI115430|Cd49f|VLA-6	integrin alpha 6	8.17685	8.32729	8.4609	8.47801	8.76091	9.11564	9.72936	9.11203
Itgae	16407	A530055J10|CD103|aM290|alpha-E1|alpha-M290	integrin alpha E, epithelial-associated	6.75574	6.94209	6.37344	5.954	7.94334	7.82978	7.29937	7.0786
Itgal	16408	(p180)|Cd11a|LFA-1|LFA-1A|Ly-15|Ly-21	integrin alpha L	8.1129	8.22622	8.25076	7.76864	8.30768	7.78455	6.12945	7.34539
Itgam	16409	CD11b/CD18|CR3|CR3A|Cd11b|F730045J24Rik|Ly-40|MAC1|Mac-1|Mac-1a	integrin alpha M	8.75979	8.01189	8.69223	8.60724	7.7289	7.99773	6.82989	7.05588
Itgax	16411	AI449405|Cd11c|Cr4|N418	integrin alpha X	5.84479	6.55985	5.9584	5.47266	8.1646	7.92456	7.27241	8.20789
Itgb1	16412	4633401G24Rik|AA409975|AA960159|CD29|ENSMUSG00000051907|Fnrb|Gm9863|gpIIa	integrin beta 1 (fibronectin receptor beta)	12.2372	11.7264	12.4985	12.5262	12.2847	12.1773	11.2622	11.5564
Itgb2	16414	2E6|AI528527|Cd18|LAD|LCAMB|Lfa1|MF17	integrin beta 2	8.78648	9.41839	8.99198	8.773	9.92328	9.82309	8.9368	9.77557
Itgb3	16416	CD61|GP3A|INGRB3	integrin beta 3	5.98967	6.16093	6.37344	6.45107	7.01335	7.27129	6.29937	7.10097
Cd47	16423	9130415E20Rik|AA407862|AI848868|AW108519|B430305P08Rik|IAP|Itgp	CD47 antigen (Rh-related antigen, integrin-associated signal transducer)	9.87309	9.40829	9.67801	9.54067	9.65051	9.80055	8.45138	8.85339
Itk	16428	Emt|Tcsk|Tsk	IL2 inducible T cell kinase	4.15448	5.27394	4.24219	4.0239	5.30148	4.94936	4.86641	5.40053
Jak1	16451	AA960307|BAP004|C130039L05Rik	Janus kinase 1	9.83779	9.66248	9.55205	9.50445	9.83367	10.033	9.50449	9.40053
Jak2	16452	Fd17	Janus kinase 2	9.09058	8.58196	8.75977	8.60886	9.08735	8.93702	8.08364	8.55434
Jak3	16453	fae|wil	Janus kinase 3	7.66083	8.844	8.43108	8.10677	9.38308	9.58533	9.76849	9.84347
Jun	16476	AP-1|Junc|c-jun	jun proto-oncogene	8.04156	7.58396	8.13528	7.79744	8.14394	7.95754	7.58888	7.41845
Kdr	16542	6130401C07|Flk-1|Flk1|Krd-1|Ly73|VEGFR-2|VEGFR2|sVEGFR-2	kinase insert domain protein receptor	7.4566	6.66154	7.58459	6.50095	7.79222	7.6498	6.40247	7.20789
Kit	16590	Bs|CD117|Fdc|Gsfsco1|Gsfsco5|Gsfsow3|SCO1|SCO5|SOW3|Ssm|Tr-kit|W|c-KIT	kit oncogene	5.17078	5.08411	4.24219	4.0239	6.05821	5.77533	6.12945	6.77904
Klra1	16627	A1|CH29-493D4.3|Klra22|Ly49a|Ly49o<129>|Ly49v	killer cell lectin-like receptor, subfamily A, member 1	-0.304953	1.40604	2.65723	1.13638	3.02846	2.48993	3.12945	3.88596
Klra2	16633	Klra30|Ly49b	killer cell lectin-like receptor, subfamily A, member 2	9.30976	9.39131	9.27824	9.1375	7.65295	6.65986	5.24493	6.28806
Klra3	16634	5E6|Ly49c|NK-2.1|Nk-2|Nk2|Nk2.1	killer cell lectin-like receptor, subfamily A, member 3	0.695047	1.08411	0.849876	1.13638	2.76542	1.48993	3.12945	2.66357
Klra4	16635	Chok|Klra32|Klra33|Ly-49d|Ly49d|ly49r<129>	killer cell lectin-like receptor, subfamily A, member 4	4.12131	4.36951	4.30931	4.172	4.35039	4.81186	5.12945	4.40053
Klra5	16636	Ly49e	killer cell lectin-like receptor, subfamily A, member 5	2.28001	2.991	3.1718	2.90191	4.35039	3.48993	5.35184	5.0786
Klra6	16637	Ly49f|ly-49f	killer cell lectin-like receptor, subfamily A, member 6	2.28001	2.78455	3.1718	1.13638	4.61342	3.65986	5.86641	4.66357
Klra7	16638	LGL-1|Ly-49G.1|Ly-49G.2|Ly-49G.3|Ly49G.4|Ly49g|Ly49g1|Ly49g2	killer cell lectin-like receptor, subfamily A, member 7	3.9045	4.29357	2.65723	3.06238	4.53096	5.13379	4.12945	4.98549
Klrc1	16641	CD159a|NKG2A|NKG2B	killer cell lectin-like receptor subfamily C, member 1	6.24194	7.12303	6.89427	6.12733	6.63332	6.61922	6.45138	6.0786
Klrc2	16642	NKG2C	killer cell lectin-like receptor subfamily C, member 2	4.21861	5.51038	5.1718	4.33801	4.96706	4.94936	4.54449	4.53803
Klrd1	16643	CD94	killer cell lectin-like receptor, subfamily D, member 1	6.75574	7.63486	6.27614	6.39941	6.65295	6.39682	6.24493	6.40053
Lag3	16768	CD223|LAG-3|Ly66	lymphocyte-activation gene 3	6.20284	7.28868	6.59134	6.00427	8.27005	8.16941	7.75394	8.33599
Lamp1	16783	AI196048|CD107a|Lamp-1	lysosomal-associated membrane protein 1	11.5891	11.4681	11.372	11.3786	11.4624	11.5985	10.6556	10.7528
Lamp2	16784	CD107b|LGP-B|Lamp II|Lamp-2|Lamp-2a|Lamp-2b|Lamp-2c|Mac3	lysosomal-associated membrane protein 2	11.2518	10.4764	10.9649	10.9181	10.5336	10.2778	9.4693	9.35473
Lbp	16803	Bpifd2|Ly88	lipopolysaccharide binding protein	6.53425	5.12851	5.1718	4.56934	6.02846	5.73786	6.29937	5.83349
Lck	16818	Hck-3|Lsk|Lskt|p56<lck>|p56Lck	lymphocyte protein tyrosine kinase	6.91905	7.61159	6.64429	6.4365	7.77441	7.39682	6.90204	7.0328
Lcn2	16819	24p3|AW212229|Sip24	lipocalin 2	5.29496	4.36951	1.84988	3.4583	8.61342	8.57208	9.03634	8.8665
Lgals3	16854	GBP|L-34|Mac-2|gal3	lectin, galactose binding, soluble 3	11.0991	10.988	11.066	11.9337	11.035	11.3228	11.5016	10.8435
Lif	16878	-	leukemia inhibitory factor	7.1129	6.67657	7.71406	7.39941	6.63332	6.71875	6.06805	6.50487
Gzmm	16904	Lmet1|MMET-1	granzyme M (lymphocyte met-ase 1)	1.28001	2.89147	2.43484	2.72134	3.02846	2.81186	2.54449	3.88596
Psmb9	16912	Lmp-2|Lmp2	proteasome (prosome, macropain) subunit, beta type 9 (large multifunctional peptidase 2)	9.31801	9.73785	9.28242	9.56012	9.63825	9.76606	9.25184	9.35937
Psmb8	16913	Lmp-7|Lmp7	proteasome (prosome, macropain) subunit, beta type 8 (large multifunctional peptidase 7)	12.0049	12.2006	12.192	12.0817	12.521	12.5085	11.7466	12.0379
Anxa1	16952	Anx-1|Anx-A1|C430014K04Rik|Lpc-1|Lpc1	annexin A1	10.5654	10.3793	10.3803	10.7303	9.95722	10.0464	10.7269	9.96125
Xcl1	16963	AI661682|ATAC|LTN|Lptn|SCM-1|SCM-1a|Scyc1	chemokine (C motif) ligand 1	7.38853	7.84566	7.54336	6.74519	8.21168	7.76606	6.82989	7.40053
Lrp1	16971	A2mr|AI316852|CD91|Lrp|b2b1554Clo	low density lipoprotein receptor-related protein 1	11.566	11.1411	11.8566	11.8405	11.4954	11.6199	10.5473	10.894
Lrrn3	16981	NLRR-3	leucine rich repeat protein 3, neuronal	4.0526	3.60767	4.0978	3.94373	4.90293	5.13379	5.12945	4.53803
Lta	16992	LT|LT-[a]|LT-alpha|LT[a]|LTalpha|Ltx|TNF-beta|TNFSF1|Tnfb|Tnfsf1b|hlb382	lymphotoxin A	5.01697	5.19264	4.70786	4.4583	5.65295	5.61922	4.54449	5.88596
Ltb	16994	AI662801|LTbeta|Tnfc|Tnfsf3|p33	lymphotoxin B	7.3244	7.84898	6.64429	6.53555	8.34436	7.89932	7.06805	7.63319
Ltbr	17000	AI256028|CD18|LTbetaR|Ltar|TNF-R-III|TNFCR|TNFR-RP|TNFR2-RP|TNFRrp|Tnfbr|Tnfrsf3	lymphotoxin B receptor	8.55147	8.31293	8.61806	8.52353	8.22486	8.37868	8.15919	8.11203
Ltf	17002	Csp82|Lf|MMS10R|Ms10r	lactotransferrin	2.15448	2.25404	3.55032	2.13638	4.02846	4.81186	5.12945	4.0786
Ltk	17005	-	leukocyte tyrosine kinase	2.39549	4.17157	3.43484	2.98437	4.53096	4.81186	5.79241	5.83349
Klrb1c	17059	AI462337|CD161|Ly-59|Ly55c|Ly59|NK-RP1|NK1.1|NKR-P1.9|NKRP1|NKRP140|Nk-1|Nk-1.2|Nk1|Nk1.2|Nkrp1c|ly-55c	killer cell lectin-like receptor subfamily B member 1C	1.28001	1.89147	0.849876	2.39941	3.61342	2.81186	3.54449	3.0786
Blnk	17060	BASH|Bca|Ly-57|Ly57|Lyw-57|SLP-65	B cell linker	7.76114	7.55172	7.18973	7.25324	7.59324	7.3603	7.15919	6.40053
Epcam	17075	CD326|EGP|EGP-2|Egp314|Ep-CAM|EpCAM1|GA733-2|Ly74|TROP1|Tacsd1|Tacstd1|gp40	epithelial cell adhesion molecule	5.48946	7.55579	3.84988	6.954	8.07285	7.94936	9.45737	9.11203
Cd180	17079	F630107B15|Ly78|RP105	CD180 antigen	8.78516	9.23132	8.79239	8.50968	7.97488	8.10464	7.32585	7.61776
Il1rl1	17082	DER4|Fit-1|Ly84|ST2L|St2|St2-rs1|T1|T1/ST2	interleukin 1 receptor-like 1	7.60794	7.68402	7.1986	7.09522	6.91923	6.73786	5.71441	5.66357
Tmed1	17083	Il1rl1l|Ly84l|St2l	transmembrane emp24 domain containing 1	6.9045	7.33678	7.2162	7.04807	7.60337	7.83866	7.82989	7.0328
Ly86	17084	MD-1|MD1	lymphocyte antigen 86	9.66227	9.44276	9.0978	9.01167	9.11592	8.62948	6.82989	7.61776
Ly9	17085	AI893573|CD229|Lgp100|Ly-9|SLAMF3|T100	lymphocyte antigen 9	7.10019	7.36951	6.89427	6.56264	7.02846	6.88225	6.12945	6.32653
Ncr1	17086	Ly94|NKp46	natural cytotoxicity triggering receptor 1	6.76114	7.66907	6.50809	6.31429	7.19838	7.47862	7.27241	7.60216
Ly96	17087	ESOP-1|MD-2|MD2	lymphocyte antigen 96	7.64924	7.40604	7.54336	7.49393	7.30148	7.37258	6.86641	6.80652
Lyn	17096	AA407514|Hck-2|p53Lyn|p56Lyn	Yamaguchi sarcoma viral (v-yes-1) oncogene homolog	9.53189	9.6008	9.53287	9.35941	9.24116	9.56942	8.17384	8.92409
Lyz2	17105	AI326280|Lys|Lysm|Lyzs|Lzm|Lzm-s1|Lzp	lysozyme 2	14.2483	14.3738	13.9397	14.0196	14.541	14.3874	13.6815	13.92
Smad2	17126	7120426M23Rik|Madh2|Madr2|Smad-2|mMad2	SMAD family member 2	6.8397	6.48499	6.8611	6.65994	6.76542	6.55602	6.45138	6.47092
Smad3	17127	AU022421|Madh3	SMAD family member 3	8.66659	8.53944	8.60476	8.63782	9.37423	9.58533	9.29268	9.07296
Smad4	17128	AW743858|D18Wsu70e|DPC4|Madh4	SMAD family member 4	8.3407	7.47213	7.87224	7.91774	7.60337	6.9162	6.35184	6.28806
Maf	17132	2810401A20Rik|A230108G15Rik|AW047063|c-maf	avian musculoaponeurotic fibrosarcoma (v-maf) AS42 oncogene homolog	7.44324	8.61549	7.65723	7.77445	7.95129	8.37868	8.06805	8.35473
Mapkapk2	17164	AA960234|MAPKAP-K2|MK-2|MK2|Rps6kc1	MAP kinase-activated protein kinase 2	8.79702	8.64635	8.52583	8.59088	8.54153	8.54521	8.17384	7.88596
Marco	17167	AI323439|Ly112|Scara2	macrophage receptor with collagenous structure	3.55303	3.72797	3.93734	3.4583	4.25085	4.48993	4.35184	3.88596
Masp1	17174	AW048060|CCPII|Crarf|Masp1/3	mannan-binding lectin serine peptidase 1	6.82433	6.40604	7.38903	7.4365	7.21168	7.45572	6.40247	5.72246
Masp2	17175	MASP-2|MAp19	mannan-binding lectin serine peptidase 2	1.28001	1.40604	1.84988	1.13638	2.02846	2.48993	3.12945	2.0786
Mbl2	17195	L-MBP|MBL|MBL-C|MBP-C	mannose-binding lectin (protein C) 2	1.5024	1.08411	2.84988	2.27388	2.02846	2.48993	3.86641	3.40053
Cd46	17221	Mcp	CD46 antigen, complement regulatory protein	-1.30495	1.40604	-0.150124	-1.18555	2.02846	2.48993	3.86641	3.88596
Cma1	17228	MMCP-5|Mcp-5|Mcp5|Mcpt5	chymase 1, mast cell	5.69505	6.52706	5.89427	5.72134	5.53096	7.3603	7.35184	6.83349
Mef2c	17260	5430401D19Rik|9930028G15Rik|AV011172|Mef2|Mef2c_Mm	myocyte enhancer factor 2C	8.37629	7.24902	8.20302	7.60886	7.15774	7.17643	7.21691	6.63319
Mertk	17289	Eyk|Mer|Nyk|nmf12	c-mer proto-oncogene tyrosine kinase	5.70627	6.43284	6.18973	6.2323	7.01335	6.98179	6.35184	7.123
Mfge8	17304	AA408458|AI325141|MFG-E8|MP47|Mfgm|P47|SED1|lactadherin	milk fat globule-EGF factor 8 protein	8.45992	7.40604	8.2635	8.11366	8.8272	8.65986	8.3389	8.54621
Mif	17319	GIF|Glif	macrophage migration inhibitory factor	10.8932	10.9374	11.0148	11.6442	10.7867	11.2507	11.3679	10.7152
Cxcl9	17329	BB139920|CMK|Mig|MuMIG|Scyb9|crg-10	chemokine (C-X-C motif) ligand 9	10.5244	11.6091	10.6637	10.3705	11.4974	11.4251	9.82989	10.8335
Mme	17380	6030454K05Rik|C85356|CALLA|CD10|NEP|SFE	membrane metallo endopeptidase	9.31893	8.32013	8.897	9.46371	8.82288	8.7707	7.58888	7.66357
Mmp9	17395	AW743869|B/MMP9|Clg4b|MMP-9|pro-MMP-9	matrix metallopeptidase 9	6.84986	6.63101	6.35767	6.40691	6.05821	6.24482	5.54449	5.60216
Psmd7	17463	AW107203|Mov-34|Mov34	proteasome (prosome, macropain) 26S subunit, non-ATPase, 7	9.54523	9.59092	9.50272	9.65365	9.47692	9.51784	9.69423	9.123
Cd200	17470	Mox2|OX2	CD200 antigen	8.03044	7.35557	7.79239	7.57932	9.2444	8.85188	8.25873	8.18713
Mpo	17523	mKIAA4033	myeloperoxidase	2.28001	3.25404	3.0198	2.51489	3.76542	3.0749	4.12945	4.24853
Mrc1	17533	AW259686|CD206|MR	mannose receptor, C type 1	9.66659	9.17025	9.31952	9.32521	8.92731	9.22802	8.56685	8.64085
Muc1	17829	CD227|EMA|Muc-1	mucin 1, transmembrane	4.1869	4.21339	3.93734	3.67243	5.02846	5.39682	6.24493	6.43615
Mx1	17857	AI893580|Mx|Mx-1	MX dynamin-like GTPase 1	1.01698	0.669074	1.43484	-0.185552	1.4435	1.48993	2.54449	2.66357
Mx2	17858	AI528743|Mx-2	MX dynamin-like GTPase 2	6.67804	7.41054	7.56412	7.03362	5.99809	6.10464	6.49868	6.80652
Myc	17869	AU016757|Myc2|Niard|Nird|bHLHe39	myelocytomatosis oncogene	8.81917	8.64062	9.29696	8.94373	8.86976	8.79371	9.26558	9.48799
Myd88	17874	-	myeloid differentiation primary response gene 88	7.32076	7.02663	7.00975	6.79744	7.04341	7.50116	7.00392	7.05588
Ncam1	17967	CD56|E-NCAM|NCAM-1|Ncam	neural cell adhesion molecule 1	10.434	9.70158	10.5027	10.4246	10.06	9.88868	9.02022	9.19234
Ncf4	17972	AI451400|p40phox	neutrophil cytosolic factor 4	9.49433	9.23386	9.21182	9.32916	9.36831	9.21785	8.52176	8.82007
Nfatc1	18018	2210017P03Rik|AI449492|AV076380|NF-ATc|NFAT2|NFATc|Nfatcb	nuclear factor of activated T cells, cytoplasmic, calcineurin dependent 1	7.06137	7.46349	7.37344	7.50095	7.62341	7.79371	8.02022	7.57046
Nfatc2	18019	AI607462|NF-ATc2|NF-ATp|NFAT1|NFAT1-D|Nfatp	nuclear factor of activated T cells, cytoplasmic, calcineurin dependent 2	7.07009	7.51456	7.2162	7.09522	7.04341	7.58796	8.17384	7.47092
Nfatc3	18021	C80703|D8Ertd281e|NFAT4|NFATx	nuclear factor of activated T cells, cytoplasmic, calcineurin dependent 3	6.87496	6.56793	6.55032	6.72134	6.14394	6.04452	6.12945	6.0328
Nfkb1	18033	NF-KB1|NF-kappaB|NF-kappaB1|p105|p50|p50/p105	nuclear factor of kappa light polypeptide gene enhancer in B cells 1, p105	9.58835	9.19655	9.50093	9.42085	9.38601	9.4586	8.98743	9.10651
Nfkb2	18034	NF-kappaB2|lyt|p49|p49/p100|p50B|p52	nuclear factor of kappa light polypeptide gene enhancer in B cells 2, p49/p100	9.59516	9.73785	9.60309	9.66072	9.85501	9.84968	9.66343	9.53393
Nfkbia	18035	AI462015|Nfkbi	nuclear factor of kappa light polypeptide gene enhancer in B cells inhibitor, alpha	7.67233	8.49774	7.94263	8.02877	8.80544	9.14814	9.03634	9.18189
Nefl	18039	AI847934|CMT2E|NF-L|NF68|Nfl	neurofilament, light polypeptide	2.94297	2.89147	3.43484	0.814448	3.61342	3.65986	4.12945	2.0786
Cd244	18106	2B4|C9.1|F730046O15Rik|Ly90|NAIL|NKR2B4|Nmrk|SLAMF4	CD244 natural killer cell receptor 2B4	2.5024	2.66907	3.65723	2.6218	3.61342	4.88225	4.71441	4.53803
Nos2	18126	MAC-NOS|NOS-II|Nos-2|Nos2a|i-NOS|iNOS	nitric oxide synthase 2, inducible	4.30976	5.03831	4.84988	5.22384	6.08735	6.16236	5.9368	6.60216
Notch1	18128	9930111A19Rik|Mis6|N1|Tan1|lin-12	notch 1	7.6894	8.69514	7.78651	7.98688	8.48789	8.45572	9.24493	8.70065
Slc11a1	18173	Bcg|Ity|Lsh|Nramp|Nramp1|ity	solute carrier family 11 (proton-coupled divalent metal ion transporters), member 1	7.36038	7.73157	7.41212	7.01902	7.4435	7.48993	6.12945	7.14469
Nrp1	18186	C530029I03|NP-1|NPN-1|Npn1|Nrp	neuropilin 1	9.99997	9.19394	9.81422	9.58263	9.75638	9.46148	8.00392	8.7651
Tnfrsf11b	18383	OCIF|Opg|TR1	tumor necrosis factor receptor superfamily, member 11b (osteoprotegerin)	5.82433	4.69882	6.25927	5.93339	5.14394	5.29729	4.54449	4.88596
Osm	18413	OncoM	oncostatin M	4.39549	4.54354	4.84988	4.54237	5.83581	5.53433	5.00392	5.72246
Pax5	18507	BSAP|EBB-1|KLP|Pax-5	paired box 5	2.28001	1.89147	1.84988	0.399411	3.02846	2.0749	3.86641	3.66357
Pdcd1	18566	Ly101|PD-1|Pdc1	programmed cell death 1	5.51523	7.4548	6.63124	6.54916	8.08735	7.97375	7.49868	7.77904
Pdgfrb	18596	AI528809|CD140b|PDGFR-1|Pdgfr	platelet derived growth factor receptor, beta polypeptide	7.21861	7.17157	7.13528	7.21105	7.59324	7.77533	6.54449	7.364
Pecam1	18613	C85791|Cd31|PECAM-1|Pecam	platelet/endothelial cell adhesion molecule 1	8.84733	8.43284	8.87778	8.14537	9.812	10.033	8.65301	9.41399
Cfp	18636	BCFG|Pfc	complement factor properdin	8.30976	7.57997	8.32966	7.45469	8.68667	8.13379	5.9368	7.18713
Prf1	18646	Pfn|Pfp|Prf-1	perforin 1 (pore forming protein)	4.62578	5.917	5.37344	4.98437	5.65295	5.39682	5.71441	5.83349
Abcb1a	18671	Abcb4|Evi32|Mdr1a|Mdr3|P-gp|Pgp|Pgy-3|Pgy3|mdr-3	ATP-binding cassette, sub-family B (MDR/TAP), member 1A	4.9045	4.69882	5.05933	4.72134	5.57278	5.65986	5.12945	5.32653
Pik3cd	18707	2410099E07Rik|2610208K16Rik|AW545373|p110delta	phosphatidylinositol 3-kinase catalytic delta polypeptide	7.59893	8.12029	7.2162	7.10447	7.8272	8.11929	6.97075	7.53803
Prkcd	18753	AI385711|D14Ertd420e|PKC[d]|PKCdelta|Pkcd	protein kinase C, delta	9.83012	9.95216	9.76426	9.69097	10.6308	10.5109	10.1294	10.5319
Prkce	18754	5830406C15Rik|PKC[e]|PKCepsilon|Pkce|R75156	protein kinase C, epsilon	6.02596	6.02663	6.22492	6.27388	5.96706	6.44413	6.18834	6.0786
Pla2g1b	18778	Pla2a|sPLA2IB	phospholipase A2, group IB, pancreas	1.5024	1.89147	2.1718	1.6218	3.02846	3.0749	3.12945	1.0786
Serpinb2	18788	PAI-2|Planh2|ovalbumin	serine (or cysteine) peptidase inhibitor, clade B, member 2	4.39549	6.26402	4.37344	5.84787	4.4435	4.19037	8.00392	5.60216
Plau	18792	u-PA|uPA	plasminogen activator, urokinase	9.39375	9.22238	9.49553	9.62903	9.09455	9.36645	8.92819	8.66356
Plaur	18793	Cd87|u-PAR|uPAR	plasminogen activator, urokinase receptor	8.2592	7.92016	8.77765	9.03845	8.53096	8.61922	8.35184	8.47092
Lcp1	18826	AW536232|D14Ertd310e|LCP-1|Pls2|pp65	lymphocyte cytosolic protein 1	11.0127	10.6425	10.7739	10.6701	10.7988	10.7259	9.22397	9.93969
Ccl21a	18829	6CKBAC2|6Ckine|ALP|AW987545|CKb9|SCYA21a|SLC|Scya21|Scya21b|Tca4|plt	chemokine (C-C motif) ligand 21A (serine)	5.39549	6.30328	6.40446	5.18949	4.35039	7.80282	5.63195	6.40053
Pml	18854	1200009E24Rik|AI661194|Trim19	promyelocytic leukemia	8.54992	8.51456	8.71715	8.52869	8.46586	8.4383	7.91952	8.40053
Pou2af1	18985	BOB.1|Bob-1|Bob1|OBF-1|OBF.1|OCA-B|OCAB	POU domain, class 2, associating factor 1	2.01698	3.08411	2.65723	2.27388	3.4435	3.81186	4.35184	3.66357
Pou2f2	18987	Oct-2|Oct2a|Oct2b|Otf-2|Otf2	POU domain, class 2, transcription factor 2	6.82947	7.20823	6.98943	6.50794	6.37423	6.29729	5.45138	6.24853
Pparg	19016	Nr1c3|PPAR-gamma|PPAR-gamma2|PPARgamma|PPARgamma2	peroxisome proliferator activated receptor gamma	3.98045	3.25404	3.65723	3.33801	3.76542	4.65986	5.63195	5.0786
Prg2	19074	MBP|mMBP|mMBP-1	proteoglycan 2, bone marrow	1.28001	0.0841118	2.1718	1.13638	3.4435	2.48993	3.12945	3.40053
Mapk11	19094	P38b|Prkm11|Sapk2|Sapk2b|p38-2|p38beta|p38beta2	mitogen-activated protein kinase 11	6.07875	5.95448	6.67005	6.54916	6.93535	6.89932	7.24493	6.69331
Psen1	19164	Ad3h|PS-1|PS1|S182	presenilin 1	8.38505	8.0728	8.27614	8.12506	8.09455	7.6498	7.88434	7.32653
Psen2	19165	ALG-3|Ad4h|Alg3|PS-2|PS2|Psnl2|STM2	presenilin 2	6.67233	7.36951	6.9584	6.74519	7.52031	7.7091	7.47522	7.66357
Psma2	19166	Lmpc3	proteasome (prosome, macropain) subunit, alpha type 2	10.0954	9.81882	9.67005	9.90522	9.75411	9.62179	9.43323	9.18713
Psmb10	19171	Mecl-1|Mecl1	proteasome (prosome, macropain) subunit, beta type 10	7.9735	8.7025	8.50093	8.23441	9.02093	9.29406	9.15182	9.123
Psmb7	19177	AU020723|MC14	proteasome (prosome, macropain) subunit, beta type 7	9.68018	9.18214	9.37344	9.21746	9.01335	8.63459	8.36466	7.88596
Ptgs2	19225	COX2|Cox-2|PES-2|PGHS-2|PHS II|PHS-2|Pghs2|TIS10|gripghs	prostaglandin-endoperoxide synthase 2	7.57769	6.64635	8.86668	8.68635	6.96706	6.29729	5.86641	6.24853
Ptprc	19264	B220|CD45R|Cd45|L-CA|Ly-5|Lyt-4|T200|loc	protein tyrosine phosphatase, receptor type, C	9.5016	9.93586	9.50093	9.27285	9.66024	9.54792	8.83911	9.39602
Pvrl2	19294	AI325026|AI987993|Cd112|MPH|Pvr|Pvs|nectin-2|Nectin2	poliovirus receptor-related 2	7.57463	8.21597	7.79824	7.73331	8.22486	8.05217	8.25873	8.40053
Raet1a	19368	RAE-1alpha|Rae1alpha|Raet1|Raet1d	retinoic acid early transcript 1, alpha	5.9045	5.1502	6.0397	5.85884	6.53096	6.37258	5.00392	5.16607
Rag1	19373	Rag-1	recombination activating gene 1	1.69505	1.66907	2.43484	1.13638	2.76542	2.48993	3.54449	3.0786
Rel	19696	c-Rel	reticuloendotheliosis oncogene	7.2875	7.37413	7.07869	7.24908	7.38601	7.60887	7.79241	7.20789
Rela	19697	p65	v-rel reticuloendotheliosis viral oncogene homolog A (avian)	7.65505	7.59981	7.53638	7.8088	7.70088	7.90778	7.86641	7.61776
Relb	19698	shep	avian reticuloendotheliosis viral (v-rel) oncogene related B	8.0548	7.64635	7.91597	7.93339	8.03595	7.88225	7.29937	7.79285
Reps1	19707	BB161292	RalBP1 associated Eps domain containing protein	7.69786	7.92332	7.73862	7.73331	7.70088	7.76606	7.84827	7.96125
Mst1r	19882	CD136|CDw136|Fv-2|Fv2|PTK8|Ron|STK	macrophage stimulating 1 receptor (c-met-related tyrosine kinase)	2.86497	4.54354	4.0198	4.59581	4.69142	4.81186	6.86641	5.88596
Rora	19883	9530021D13Rik|Nr1f1|ROR1|ROR2|ROR3|nmf267|sg|staggerer|tmgc26	RAR-related orphan receptor alpha	6.25729	7.49774	6.38903	7.85884	7.39769	7.96567	9.69423	7.88596
Rorc	19885	Nr1f3|RORgamma|TOR|Thor	RAR-related orphan receptor gamma	4.21861	5.27394	4.55032	5.35361	6.27639	6.44413	7.56685	7.30742
Rps6	20104	S6R	ribosomal protein S6	7.25729	6.76359	6.83856	7.20247	6.55202	6.46721	6.67377	6.16607
S100a8	20201	60B8Ag|AI323541|B8Ag|CFAg|CP-10|Caga|MRP8|p8	S100 calcium binding protein A8 (calgranulin A)	4.21861	6.32252	4.43484	4.83682	6.46586	5.84748	5.71441	6.60216
S100b	20203	AI850290|Bpb	S100 protein, beta polypeptide, neural	2.28001	2.08411	1.84988	2.27388	3.02846	3.0749	4.35184	3.0786
Saa1	20208	Saa-1|Saa2	serum amyloid A 1	0.280009	2.25404	2.65723	2.13638	3.90293	2.48993	2.54449	3.0786
Msr1	20288	MRS-A|MSR|MSR-A|SR-AI|SR-AII|Scara1|Scvr	macrophage scavenger receptor 1	8.78912	7.95139	9.13989	8.94887	8.32001	8.27129	5.9368	7.47092
Ccl1	20290	BF534335|I-309|Scya1|Tca-3	chemokine (C-C motif) ligand 1	6.93822	7.61939	7.23358	6.86973	9.14046	8.94526	8.71441	8.42733
Ccl11	20292	Scya11|eotaxin	chemokine (C-C motif) ligand 11	8.07226	9.26526	6.73252	7.51489	7.02846	8.67976	8.02022	8.22835
Ccl12	20293	MCP-5|Scya12	chemokine (C-C motif) ligand 12	9.18489	9.08693	9.88879	9.20784	9.00574	8.97375	7.63195	8.38238
Ccl17	20295	Abcd-2|Scya17|Scya17l|Tarc	chemokine (C-C motif) ligand 17	5.71741	5.991	4.65723	5.52869	9.49878	10.031	8.65301	9.20789
Ccl2	20296	AI323594|HC11|JE|MCAF|MCP-1|MCP1|SMC-CF|Scya2|Sigje	chemokine (C-C motif) ligand 2	9.44156	9.64062	10.1491	9.71682	9.54941	10.1302	8.56685	9.46231
Ccl20	20297	CKb4|LARC|MIP-3A|MIP-3[a]|MIP3A|ST38|Scya20|exodus-1	chemokine (C-C motif) ligand 20	1.5024	0.0841118	3.30931	2.72134	3.25085	3.0749	6.29937	4.40053
Ccl22	20299	ABCD-1|DCBCK|MDC|Scya22	chemokine (C-C motif) ligand 22	6.88487	7.06711	5.46459	6.1543	8.89058	9.24816	7.03634	8.21815
Ccl25	20300	A130072A22Rik|AI852536|CKb15|Scya25|TECK	chemokine (C-C motif) ligand 25	3.78251	4.08411	4.43484	4.74519	4.4435	4.48993	3.86641	4.0786
Ccl27a	20301	ALP|AW558992|CTACK|CTAK|Ccl27|ESkine|ILC|PESKY|Scya27|Scya27a	chemokine (C-C motif) ligand 27A	4.1869	4.72797	4.49373	6.04327	4.76542	4.88225	8.89321	5.53803
Ccl3	20302	AI323804|G0S19-1|LD78alpha|MIP-1alpha|MIP1-(a)|MIP1-alpha|Mip1a|Scya3	chemokine (C-C motif) ligand 3	5.36747	6.08411	6.18973	5.48687	6.98266	6.96567	6.18834	6.85996
Ccl4	20303	AT744.1|Act-2|MIP-1B|Mip1b|Scya4	chemokine (C-C motif) ligand 4	4.98045	5.68402	5.0198	4.36904	5.57278	5.65986	4.12945	4.24853
Ccl5	20304	MuRantes|RANTES|SISd|Scya5|TCP228	chemokine (C-C motif) ligand 5	9.14626	9.58196	9.08589	8.76135	9.02846	8.28435	6.79241	7.47092
Ccl6	20305	MRP-1|Scya6|c10	chemokine (C-C motif) ligand 6	6.23421	4.81203	4.84988	5.172	6.63332	6.88225	4.86641	6.50487
Ccl7	20306	MCP-3|Scya7|fic|marc|mcp3	chemokine (C-C motif) ligand 7	7.95714	8.17687	8.81277	8.31629	8.2314	8.51784	7.09907	8.18713
Ccl8	20307	1810063B20Rik|AB023418|HC14|MCP-2|Mcp2|Scya8	chemokine (C-C motif) ligand 8	11.3468	11.7002	11.2985	11.1761	12.0355	12.101	11.3694	11.4373
Ccl9	20308	CCF18|MRP-2|Scya10|Scya9	chemokine (C-C motif) ligand 9	9.83396	9.64921	9.05689	9.30229	11.0247	11.1046	10.3994	11.2473
Cxcl15	20309	Il8|Scyb15|lungkine|weche	chemokine (C-X-C motif) ligand 15	1.01698	2.40604	2.43484	1.6218	6.90293	6.16236	5.63195	5.40053
Cxcl2	20310	CINC-2a|GROb|Gro2|MIP-2|MIP-2a|Mgsa-b|Mip2|Scyb|Scyb2	chemokine (C-X-C motif) ligand 2	2.39549	2.25404	2.1718	1.6218	4.61342	3.81186	4.12945	3.0786
Cxcl5	20311	AMCF-II|ENA-78|GCP-2|LIX|Scyb5|Scyb6	chemokine (C-X-C motif) ligand 5	4.0526	6.0728	4.93734	4.27388	5.96706	6.5774	5.54449	5.93658
Cx3cl1	20312	AB030188|ABCD-3|AI848747|CX3C|Cxc3|D8Bwg0439e|Scyd1	chemokine (C-X3-C motif) ligand 1	6.44324	6.10648	6.13528	6.34583	5.83581	6.19037	5.63195	5.98549
Cxcl12	20315	Pbsf|Scyb12|Sdf1|Tlsf|Tpar1	chemokine (C-X-C motif) ligand 12	9.74422	9.7162	9.5778	9.33997	8.87813	8.99376	8.41485	8.5864
Sele	20339	CD62E|E-selectin|ELAM-1|Elam|LECAM2	selectin, endothelial cell	3.01698	3.17157	2.1718	1.13638	3.4435	4.5774	4.12945	4.24853
Sell	20343	AI528707|CD62L|L-selectin|LECAM-1|Lnhr|Ly-22|Ly-m22|Lyam-1|Lyam1	selectin, lymphocyte	6.64924	7.22366	6.50809	5.97432	7.4435	7.5774	7.12945	7.61776
Selplg	20345	CD162|Psgl-1|Psgl1|Selp1|Selpl	selectin, platelet (p-selectin) ligand	9.14729	9.19133	8.62137	8.48864	9.09455	9.21445	7.84827	8.33599
Foxp3	20371	JM2|scurfin|sf	forkhead box P3	5.58986	5.89147	5.05933	4.59581	6.50959	6.27129	4.86641	5.88596
Sh2d1a	20400	Gm686|SAP	SH2 domain containing 1A	4.69505	4.51038	4.24219	4.64734	5.69142	5.13379	4.71441	5.47092
St6gal1	20440	AW742324|Siat1|St6Gal-I|St6gal|St6galI	beta galactoside alpha 2,6 sialyltransferase 1	7.02148	6.6387	6.80407	7.02877	6.98266	6.88225	6.18834	6.24853
Smn1	20595	AI849087|Gemin1|Smn	survival motor neuron 1	7.94771	7.94209	7.92134	8.02877	7.9592	7.80282	7.88434	7.52155
Siglec1	20612	Cd169|Siglec-1|Sn	sialic acid binding Ig-like lectin 1, sialoadhesin	8.07009	8.87201	9.00975	8.84787	8.02093	8.5774	7.35184	7.57046
Snai1	20613	AI194338|Sna|Sna1|Snail|Snail1	snail family zinc finger 1	3.98045	5.44166	5.55032	4.76864	6.39769	6.5774	7.58888	6.50487
Spn	20737	A630014B01Rik|Cd43|Galgp|Ly-48|Ly48	sialophorin	8.2649	8.68402	8.43859	7.99684	8.73352	8.55063	7.7733	8.24853
Spp1	20750	2AR|Apl-1|BNSP|BSPI|Bsp|ETA-1|Eta|OP|Opn|Opnl|Ric|Spp-1	secreted phosphoprotein 1	11.8065	10.6836	11.756	11.5114	10.7643	10.5547	8.8754	9.1393
Stat1	20846	2010005J02Rik|AA408197	signal transducer and activator of transcription 1	11.3712	11.8469	11.8189	11.4076	12.2913	12.2782	11.1847	11.8534
Stat2	20847	1600010G07Rik|AW496480	signal transducer and activator of transcription 2	8.91663	8.56389	9.18079	8.53041	8.52565	8.25812	7.09907	7.92409
Stat3	20848	1110034C02Rik|AW109958|Aprf	signal transducer and activator of transcription 3	9.99883	9.73427	9.8569	9.95719	10.1714	10.2811	10.0039	10.0034
Stat4	20849	-	signal transducer and activator of transcription 4	4.73944	4.33204	3.75677	4.33801	5.08735	5.34791	2.54449	5.0786
Stat5b	20851	-	signal transducer and activator of transcription 5B	7.80357	8.21597	7.68277	7.66932	8.2444	8.51784	8.52176	8.5943
Stat6	20852	-	signal transducer and activator of transcription 6	9.29217	9.09114	9.22925	9.33015	9.29212	9.44993	9.0283	8.89238
Syk	20963	Sykb	spleen tyrosine kinase	7.9045	7.79836	7.36558	7.44381	7.99039	8.24482	6.86641	7.85996
Tal1	21349	SCL/tal-1|Scl|bHLHa17|tal-1	T cell acute lymphocytic leukemia 1	3.44993	3.47643	4.30931	3.51489	4.76542	5.29729	5.79241	5.60216
Tank	21353	C86182|E430026L09Rik|I-TRAF	TRAF family member-associated Nf-kappa B activator	7.77186	7.15557	7.69537	7.69709	7.43218	6.94936	7.27241	6.91149
Tap1	21354	ABC17|APT1|Abcb2|Ham-1|Ham1|MTP1|PSF1|RING4|TAP|Tap-1|Y3	transporter 1, ATP-binding cassette, sub-family B (MDR/TAP)	10.3189	10.6961	10.6843	10.4069	10.9817	10.7949	10.306	10.5982
Tap2	21355	ABC18|AI462429|APT2|Abcb3|Ham-2|Ham2|MTP2|PSF2|RING11|Tap-2|Y1|jas	transporter 2, ATP-binding cassette, sub-family B (MDR/TAP)	8.82175	9.77498	9.94659	9.63782	10.4838	10.6422	10.9475	10.6598
Tapbp	21356	D17Wsu91e|TPN	TAP binding protein	10.2748	10.7605	10.4526	10.4379	10.6481	10.8617	9.99157	10.2535
Tcf7	21414	AI465550|TCF-1|Tcf1	transcription factor 7, T cell specific	6.64924	7.16626	6.53638	6.50794	7.11592	6.79371	6.35184	6.0328
Tfeb	21425	Tcfeb|bHLHe35	transcription factor EB	7.82433	8.25404	8.35767	8.25324	7.80105	7.97375	8.11434	8.0786
Tek	21687	AA517024|Cd202b|Hyk|STK1|Tie-2|Tie2	endothelial-specific receptor tyrosine kinase	6.27248	5.81203	6.05933	5.00427	6.85289	7.4088	6.63195	6.83349
Tgfb1	21803	TGF-beta1|TGFbeta1|Tgfb|Tgfb-1	transforming growth factor, beta 1	10.1034	9.36604	9.8625	9.96102	9.88437	9.93495	8.36466	9.02112
Tgfb2	21808	BB105277|Tgf-beta2|Tgfb-2	transforming growth factor, beta 2	6.37453	5.44166	6.70786	6.12733	5.93535	6.24482	6.45138	6.40053
Tgfb3	21809	TGF-beta-3|Tgfb-3	transforming growth factor, beta 3	9.28282	8.51874	9.119	8.99932	9.08012	9.57474	8.79241	9.0616
Tgfbr1	21812	ALK5|AU017191|Alk-5|ESK2|TGFR-1|TbetaR-I|TbetaRI	transforming growth factor, beta receptor I	9.96593	9.87934	9.81277	9.87312	9.83581	9.63714	8.45138	8.94279
Tgfbr2	21813	1110020H15Rik|AU042018|DNIIR|RIIDN|TBR-II|TbetaR-II|TbetaRII	transforming growth factor, beta receptor II	11.4155	10.872	11.1645	11.0221	11.2059	11.3448	9.88434	10.1923
Thbd	21824	AI385582|CD141|TM	thrombomodulin	7.36393	6.36951	6.8833	5.80313	6.35039	6.88225	5.24493	5.66357
Thbs1	21825	TSP-1|TSP1|Thbs-1|tbsp1	thrombospondin 1	11.538	10.8785	11.9217	11.6777	11.1317	11.2933	10.4087	10.5884
Thy1	21838	CD90|T25|Thy-1|Thy-1.2|Thy1.1|Thy1.2	thymus cell antigen 1, theta	8.57003	8.7776	8.47193	8.43283	8.86976	9.01741	8.67377	8.0328
Tie1	21846	D430008P04Rik|TIE|tie-1	tyrosine kinase with immunoglobulin-like and EGF-like domains 1	7.3244	7.27887	7.65723	6.75696	8.49335	8.83866	7.95388	8.67852
Tlr1	21897	-	toll-like receptor 1	7.23808	7.74589	7.11666	6.99932	7.19838	6.99773	6.67377	6.24853
Tlr4	21898	Lps|Ly87|Ran/M1|Rasl2-8	toll-like receptor 4	7.83715	7.23893	7.8555	7.50794	7.39769	7.33542	5.86641	7.05588
Tlr6	21899	-	toll-like receptor 6	6.81399	6.47643	6.1718	6.47978	6.37423	6.46721	5.45138	5.83349
Tnf	21926	DIF|TNF-a|TNF-alpha|TNFSF2|TNFalpha|Tnfa|Tnfsf1a	tumor necrosis factor	5.43651	6.43284	5.5778	5.65994	6.46586	6.84748	6.71441	6.364
Tnfaip3	21929	A20|Tnfip3	tumor necrosis factor, alpha-induced protein 3	7.81658	8.10925	7.84988	7.79744	8.19169	8.25812	7.65301	7.88596
Tnfrsf10b	21933	DR5|KILLER|Ly98|MK|TRAILR2|TRICK2A|TRICK2B|TRICKB	tumor necrosis factor receptor superfamily, member 10b	6.98967	6.51874	7.0198	7.31429	6.63332	6.79371	6.24493	5.93658
Tnfrsf11a	21934	Ly109|ODFR|OFE|Rank|TRANCE-R|mRANK	tumor necrosis factor receptor superfamily, member 11a, NFKB activator	7.41615	7.29357	7.66366	7.3103	6.86976	6.59846	6.86641	6.57046
Tnfrsf17	21935	BCM|BCMA|Tnfrsf13|Tnfrsf13a	tumor necrosis factor receptor superfamily, member 17	2.01698	1.08411	1.43484	0.814448	2.76542	2.48993	3.54449	4.98549
Tnfrsf18	21936	AITR|Gitr	tumor necrosis factor receptor superfamily, member 18	4.76114	5.52706	5.05933	5.20677	6.37423	6.29729	6.49868	6.0786
Tnfrsf1a	21937	CD120a|FPF|TNF-R|TNF-R-I|TNF-R1|TNF-R55|TNF-alphaR1|TNFAR|TNFR60|TNFRI|TNFRp55|TNFalpha-R1|Tnfr-2|Tnfr1|p55|p55-R	tumor necrosis factor receptor superfamily, member 1a	9.66803	9.70708	9.65562	9.7824	9.57535	10.0037	10.0121	9.53393
Tnfrsf1b	21938	CD120b|TNF-R-II|TNF-R2|TNF-R75|TNF-alphaR2|TNFBR|TNFR80|TNFRII|TNFalpha-R2|Tnfr-1|Tnfr2|p75	tumor necrosis factor receptor superfamily, member 1b	8.21861	9.40717	8.50093	8.571	9.93134	10.1553	10.2027	10.1975
Cd40	21939	AI326936|Bp50|GP39|HIGM1|IGM|IMD3|T-BAM|TRAP|Tnfrsf5|p50	CD40 antigen	7.02596	7.68402	6.87224	6.90721	7.73812	7.94936	6.86641	7.57046
Cd27	21940	S152|Tnfrsf7|Tp55	CD27 antigen	4.73944	5.31293	4.70786	3.51489	6.08735	4.94936	5.24493	6.0328
Tnfrsf8	21941	Cd30|D1S166E|Ki|Ki-1	tumor necrosis factor receptor superfamily, member 8	2.69505	2.54354	3.43484	2.6218	3.25085	3.0749	4.12945	2.66357
Tnfrsf9	21942	4-1BB|A930040I11Rik|AA408498|AI325004|CDw137|Cd137|ILA|Ly63	tumor necrosis factor receptor superfamily, member 9	3.3389	2.66907	3.1718	3.81445	3.90293	3.81186	4.54449	4.53803
Tnfsf11	21943	Ly109l|ODF|OPG|OPGL|RANKL|Trance	tumor necrosis factor (ligand) superfamily, member 11	5.07009	4.917	3.1718	4.13638	5.57278	5.61922	5.24493	7.05588
Tnfsf12	21944	Apo3l|Dr3l|Dr3lg|Tweak	tumor necrosis factor (ligand) superfamily, member 12	6.63756	6.39699	6.0198	6.20677	6.65295	6.77533	5.00392	6.20789
Cd40lg	21947	CD154|CD40-L|Cd40l|HIGM1|IGM|IMD3|Ly-62|Ly62|T-BAM|TRAP|Tnfsf5|gp39	CD40 ligand	3.9045	4.51038	4.65723	3.6218	5.39769	5.65986	5.54449	5.93658
Cd70	21948	CD27LG|Cd27l|Tnfsf7	CD70 antigen	2.86497	3.54354	3.55032	3.33801	4.61342	5.24482	5.63195	5.98549
Tnfsf8	21949	CD153|CD30LG|Cd30l	tumor necrosis factor (ligand) superfamily, member 8	3.86497	4.66907	4.24219	4.4583	5.02846	4.48993	4.35184	4.77904
Traf2	22030	AI325259	TNF receptor-associated factor 2	8.15653	8.23893	8.33369	8.1296	8.69142	8.54521	8.72439	8.45364
Traf3	22031	AI528849|CAP-1|CD40bp|CRAF1|LAP1|T-BAM|amn	TNF receptor-associated factor 3	7.44324	7.80521	7.44233	7.20677	7.55202	7.96567	7.29937	7.63319
Traf6	22034	2310003F17Rik|AI851288|C630032O20Rik	TNF receptor-associated factor 6	7.07009	6.90429	6.99962	7.26153	6.96706	6.93288	6.49868	6.66357
Tnfsf10	22035	A330042I21Rik|AI448571|APO-2L|Ly81|TL2|Trail	tumor necrosis factor (ligand) superfamily, member 10	6.97582	7.31293	6.94791	6.72134	7.55202	7.86497	6.35184	7.22835
Tfrc	22042	2610028K12Rik|AI195355|AI426448|AU015758|CD71|E430033M20Rik|Mtvr-1|Mtvr1|TFR|TFR1|TR|Trfr|p90	transferrin receptor	8.55923	8.46349	8.77172	8.65365	7.38601	7.50116	8.31267	7.43615
Trp53	22059	Tp53|bbl|bfy|bhy|p44|p53	transformation related protein 53	7.71464	8.93898	8.81854	8.50968	9.63332	10.0213	10.7539	10.1065
Twist1	22160	AA960487|M-Twist|Pde|Ska10|Ska<m10Jus>|Twist|bHLHa38|pdt	twist basic helix-loop-helix transcription factor 1	8.19887	7.10648	7.79239	7.73629	8.29525	7.99773	5.79241	6.83349
Tnfrsf4	22163	ACT35|CD134|Ly-70|Ox40|TXGP1L|Txgp1	tumor necrosis factor receptor superfamily, member 4	5.0349	4.33204	4.84988	4.06238	5.30148	4.07489	4.35184	4.53803
Tnfsf4	22164	Ath-1|Ath1|CD134L|OX-40L|Ox40l|TXGP1|Txgp1l|gp34	tumor necrosis factor (ligand) superfamily, member 4	1.86497	2.78455	2.43484	1.98437	3.76542	3.0749	2.54449	3.66357
Txk	22165	A130089B16Rik|Btkl|PTK-RL-18|PTK4|Rlk	TXK tyrosine kinase	3.86497	5.44166	4.49373	4.09985	4.02846	4.88225	4.71441	5.53803
Cmpk2	22169	1200004E04Rik|TDKI|Tyki	cytidine monophosphate (UMP-CMP) kinase 2, mitochondrial	7.98045	8.15289	8.37344	8.16759	6.80105	6.75672	6.54449	6.53803
Ubc	22190	2700054O04Rik|AI194771|Rps27a|TI-225|Uba52|Ubb	ubiquitin C	11.9558	11.4914	11.9304	11.7352	11.7167	11.5787	11.5232	11.2014
Vcam1	22329	CD106|Vcam-1	vascular cell adhesion molecule 1	7.73122	8.02369	7.45721	7.14088	8.33224	8.14814	7.24493	7.99747
Vegfa	22339	Vegf|Vpf	vascular endothelial growth factor A	8.27625	7.15557	9.13989	9.50619	7.91923	8.11198	8.09907	8.30742
Vegfc	22341	AW228853|VEGF-C	vascular endothelial growth factor C	7.9045	6.98498	7.80988	7.63143	7.42078	7.43245	6.29937	6.77904
Vhl	22346	Vhlh	von Hippel-Lindau tumor suppressor	5.86497	5.66907	5.34173	6.01412	5.76542	6.29729	5.79241	6.0328
Vim	22352	-	vimentin	13.439	13.1643	13.624	13.4914	13.4236	13.5931	12.618	13.174
Vwf	22371	6820430P06Rik|AI551257|B130011O06Rik|C630030D09|F8VWF|VWD	Von Willebrand factor homolog	6.49595	6.71347	6.74469	5.3843	8.08012	8.57208	8.00392	8.57845
Xbp1	22433	D11Ertd39e|TREB-5|TREB5|XBP-1	X-box binding protein 1	9.75844	9.18477	9.64429	9.4851	9.75638	9.63968	9.29268	8.97342
Yy1	22632	AW488674|NF-E1	YY1 transcription factor	9.41358	9.14481	9.15594	9.21533	9.03221	9.11564	8.91953	8.69331
Zap70	22637	Srk|ZAP-70|mrtle|mur	zeta-chain (TCR) associated protein kinase	5.60194	6.88501	6.24219	5.54237	7.80105	7.6896	8.09907	8.20789
Zfp13	22654	4933429B21|AI835008|Krox-8|Rhit|Zfp-13	zinc finger protein 13	4.44993	4.21339	4.43484	4.76864	4.35039	5.19037	5.12945	4.66357
Ikzf1	22778	5832432G11Rik|Ikaros|LyF-1|Zfpn1a1|Znfn1a1|hlk-1|mKIAA4227	IKAROS family zinc finger 1	6.60794	7.40152	6.55032	6.42178	7.08735	7.13379	6.86641	7.123
Ikzf2	22779	A730095J18Rik|Helios|Zfpn1a2|Znfn1a2	IKAROS family zinc finger 2	6.44993	7.11202	6.44979	6.8088	7.35039	7.4088	8.17384	7.34539
Akt3	23797	AI851531|D930002M15Rik|Nmf350	thymoma viral proto-oncogene 3	8.1728	7.33204	8.08828	8.0018	7.28899	7.54522	6.29937	7.0328
Xcr1	23832	Ccxcr1|Gpr5|mXcr1	chemokine (C motif) receptor 1	4.73944	5.01485	4.0978	3.67243	5.69142	5.01349	6.00392	5.40053
Clec5a	23845	Clecsf5|Ly100|MDL-1|Mdl1	C-type lectin domain family 5, member a	7.86246	6.75654	7.70162	7.3805	7.19838	6.67976	5.35184	5.93658
Ets1	23871	AI196000|AI448617|D230050P06|Ets-1|Tpl1	E26 avian leukemia oncogene 1, 5' domain	9.85807	9.65965	9.68593	9.641	10.0341	10.1852	9.1444	9.5864
Hcst	23900	DAP10|KAP10	hematopoietic cell signal transducer	5.24964	7.01485	6.35767	5.84787	7.70088	7.99773	8.56685	8.38238
Sh2b2	23921	Aps	SH2B adaptor protein 2	5.58986	5.51038	5.46459	5.39941	5.90293	6.01349	6.18834	5.47092
Nt5e	23959	2210401F01Rik|AI447961|CD73|NT|Nt5|eNT	5' nucleotidase, ecto	8.73122	7.51456	8.79532	8.84235	8.52565	8.31011	6.67377	7.14469
Pin1	23988	0610025L01Rik|D9Bwg1161e	protein (peptidyl-prolyl cis/trans isomerase) NIMA-interacting 1	4.71741	5.38789	5.0978	5.54237	4.25085	5.34791	5.79241	5.40053
Ccl19	24047	CKb11|ELC|MIP3B|Scya19|exodus-3	chemokine (C-C motif) ligand 19	4.0526	4.991	4.0198	3.72134	4.4435	4.73786	4.54449	4.98549
Sigirr	24058	AI256711|TIR8	single immunoglobulin and toll-interleukin 1 receptor (TIR) domain	5.28001	5.96675	4.97916	4.90191	6.02846	6.77533	6.71441	6.364
Tlr2	24088	Ly105	toll-like receptor 2	7.91422	7.8523	8.13528	7.75989	8.10171	7.86497	7.54449	7.77904
Tnfsf13b	24099	BAFF|BLyS|D8Ertd387e|TALL-1|TALL1|THANK|TNFSF20|zTNF4	tumor necrosis factor (ligand) superfamily, member 13b	6.10444	6.66907	6.29282	6.18077	6.17142	5.88225	6.45138	6.43615
Usp18	24110	1110058H21Rik|AW047653|UBP43|Ubp15	ubiquitin specific peptidase 18	7.29124	7.63486	7.92134	7.68173	6.55202	6.98179	6.49868	6.32653
Axl	26362	AI323647|Ark|Tyro7|Ufo	AXL receptor tyrosine kinase	10.994	11.1387	11.2217	11.1892	10.78	11.0474	10.2587	10.3194
Adgre5	26364	AA409984|Cd97|TM7LN1	adhesion G protein-coupled receptor E5	7.02148	7.39245	7.43484	6.75696	8.51496	8.45572	8.56685	8.7651
Ceacam1	26365	Bgp|Bgp1|C-CAM|CD66a|Cc1|Cea-1|Cea-7|Cea1|Cea7|Hv-2|Hv2|MHVR|MHVR1|Mhv-1|bb-1|mCEA1|mmCGM1|mmCGM1a|mmCGM2	carcinoembryonic antigen-related cell adhesion molecule 1	4.12131	3.991	4.55032	3.39941	4.83581	5.48993	4.71441	4.88596
Map2k1	26395	MAPKK1|MEKK1|Mek1|Prkmk1	mitogen-activated protein kinase kinase 1	8.85618	8.56389	8.83002	8.9138	8.59831	8.7614	8.27241	8.24853
Map2k2	26396	AA589381|MEK2|MK2|Prkmk2	mitogen-activated protein kinase kinase 2	8.5468	8.55172	8.51521	8.66776	8.50959	8.81186	9.20982	8.49646
Map2k4	26398	JNKK1|MEK4|MKK4|PRKMK4|Sek1|Serk1	mitogen-activated protein kinase kinase 4	8.22838	8.00298	8.05933	8.3862	7.81854	7.86497	8.08364	7.32653
Map3k1	26401	MAPKKK1|MEKK1|Mekk	mitogen-activated protein kinase kinase kinase 1	7.41272	7.92332	7.1718	7.73331	7.49878	7.9162	8.32584	7.94897
Map3k5	26408	7420452D20Rik|ASK|ASK1|MAPKKK5|Mekk5	mitogen-activated protein kinase kinase kinase 5	7.21861	7.92016	7.18079	7.06238	7.48789	7.2314	7.42713	8.04439
Map3k7	26409	B430101B05|C87327|Tak1	mitogen-activated protein kinase kinase kinase 7	8.28189	7.84898	8.18527	8.10907	8.03595	7.71875	7.61057	7.64846
Map4k2	26412	AI385662|BL44|GCK|Rab8ip	mitogen-activated protein kinase kinase kinase kinase 2	6.53425	6.78455	6.47923	6.65365	7.04341	7.25812	7.75394	7.50487
Mapk1	26413	9030612K14Rik|AA407128|AU018647|C78273|ERK|Erk2|MAPK2|PRKM2|Prkm1|p41mapk|p42mapk	mitogen-activated protein kinase 1	9.27907	8.68774	8.8555	9.05285	8.67712	8.54521	7.98743	7.72246
Mapk14	26416	CSBP2|Crk1|Csbp1|Mxi2|PRKM14|PRKM15|p38|p38-alpha|p38MAPK|p38a|p38alpha	mitogen-activated protein kinase 14	9.31343	9.35907	9.19195	9.12279	9.04712	9.25812	9.27241	9.19754
Mapk3	26417	Erk-1|Erk1|Ert2|Esrk1|Mnk1|Mtap2k|Prkm3|p44|p44erk1|p44mapk	mitogen-activated protein kinase 3	9.16571	9.36951	9.24219	9.55338	9.65295	9.98379	9.96655	9.80992
Mapk8	26419	AI849689|JNK|JNK1|Prkm8|SAPK1	mitogen-activated protein kinase 8	6.9045	6.8589	6.80407	6.92819	6.96706	7.05979	7.40247	7.18713
Slc7a11	26570	9930009M05Rik|AI451155|sut|xCT	solute carrier family 7 (cationic amino acid transporter, y+ system), member 11	3.5024	4.47643	3.43484	3.90191	5.65295	5.24482	5.71441	5.77904
Clec4a2	26888	Clec4a|Clecsf6|DCIR|Dcir1	C-type lectin domain family 4, member a2	6.81917	5.8523	6.29282	5.88054	5.4435	5.24482	3.12945	4.53803
Sh2d1b1	26904	EAT-2|EAT-2A|Eat2|Eat2a|Sh2d1b	SH2 domain containing 1B1	4.01697	4.25404	3.84988	3.4583	3.90293	4.5774	5.54449	4.53803
Ecsit	26940	Sitpec	ECSIT homolog (Drosophila)	5.47641	5.59191	5.34173	5.52869	5.08735	5.24482	5.86641	5.32653
Klrk1	27007	D6H12S2489E|NKG2-D|Nkg2d	killer cell lectin-like receptor subfamily K, member 1	8.18088	7.8589	7.75677	7.4583	6.50959	6.24482	5.00392	5.32653
Irf5	27056	AW491843|mirf5	interferon regulatory factor 5	8.53582	8.7025	8.15821	8.36904	8.35039	8.5774	7.27241	7.98549
Slamf1	27218	4933415F16|AA177906|CD150|CDw150|ESTM51|IPO-3|Slam	signaling lymphocytic activation molecule family member 1	3.60194	3.78455	3.84988	3.20677	5.02846	3.29729	2.54449	4.88596
Tnfrsf12a	27279	AI255180|C87282|Fn14|HPIP|TWEAK-R|TweakR	tumor necrosis factor receptor superfamily, member 12a	9.38155	8.09813	9.71096	9.55	8.55202	8.40282	7.42713	7.47092
Klra15	27423	Ly49O	killer cell lectin-like receptor, subfamily A, member 15	2.94297	1.40604	1.84988	2.27388	2.76542	2.0749	3.54449	2.0786
Slamf6	30925	KAL1|KAL1b|Ly108|NTB-A|NTBA|SF2000	SLAM family member 6	5.56541	5.72797	5.24219	5.24071	6.57278	5.73786	5.12945	5.40053
Pik3cg	30955	5830428L06Rik|PI3Kgamma|p110gamma	phosphoinositide-3-kinase, catalytic, gamma polypeptide	6.63756	5.96675	6.38903	6.29826	5.86976	6.01349	5.00392	4.66357
Ebi3	50498	EBI-3|IL-27	Epstein-Barr virus induced gene 3	6.3389	5.9296	6.05933	5.69709	5.7289	5.84748	5.12945	4.53803
Elane	50701	Ela2|F430011M15Rik|NE	elastase, neutrophil expressed	0.280009	1.89147	1.84988	1.81445	3.02846	1.48993	3.54449	3.40053
Icosl	50723	AU044799|B7-H2|B7RP-1|B7h|BG071784|GI50|GL50|GL50-B|ICOS-L|Icoslg|LICOS|Ly115l|mKIAA0653	icos ligand	7.60494	7.77061	7.55032	7.44744	7.33831	7.3603	6.75394	6.77904
Il17rb	50905	Evi27|IL-17ER|IL-17Rh1|IL17RH1|Il17br	interleukin 17 receptor B	1.86497	3.72797	3.30931	2.81445	4.14394	4.39682	5.9368	4.66357
C1s1	50908	AA959438|AI255193|AI327365|C1s|C1sa	complement component 1, s subcomponent 1	9.51921	9.54149	8.3052	8.19599	8.87813	9.12656	7.12945	8.19754
C1ra	50909	AI132558|C1r|mC1rA	complement component 1, r subcomponent A	9.75169	10.3297	9.38709	9.23546	9.80325	10.2314	8.86641	9.56242
Klrg1	50928	2F1-Ag|MAFA|MAFA-L	killer cell lectin-like receptor subfamily G, member 1	4.30976	5.29357	3.30931	4.33801	4.25085	5.01349	5.79241	4.98549
Il22	50929	IL-22|IL-22a|ILTIFa|Iltif	interleukin 22	2.60194	1.66907	-0.150124	1.98437	2.76542	3.48993	1.54449	3.66357
Tnfsf14	50930	HVEM-L|HVEML|LIGHT|LTg|Ly113	tumor necrosis factor (ligand) superfamily, member 14	4.39549	4.917	4.65723	3.90191	4.83581	5.61922	5.63195	5.88596
Pvr	52118	3830421F03Rik|CD155|D7Ertd458e|HVED|PVS|Taa1|Tage4|mE4|necl-5	poliovirus receptor	7.39895	7.30328	8.38903	8.33997	7.14394	7.56675	7.24493	7.38238
Ifi27	52668	1110013J02Rik|2900026P10Rik|D12Ertd647e|ISG12a|Ifi27l1	interferon, alpha-inducible protein 27	9.89656	9.76359	9.82286	9.96165	10.0134	10.0115	10.2553	10.1203
Batf	53314	B-ATF|SFA-2	basic leucine zipper transcription factor, ATF-like	5.47641	5.47643	4.97916	4.98437	5.86976	6.37258	4.71441	5.32653
Pla2g6	53357	BB112799|PNPLA9|iPLA(2)beta|iPLA2|iPLA2beta	phospholipase A2, group VI	6.58986	6.53532	6.89427	6.65365	7.05821	7.05979	7.52177	7.66357
Cd164	53599	A115|A24|AA589639|AW540279|MGC-24|MSSP	CD164 antigen	10.5016	10.0974	10.1237	10.2201	10.6021	10.2843	9.23797	9.59824
Tlr5	53791	-	toll-like receptor 5	3.94297	3.47643	3.93734	3.94373	4.61342	5.13379	4.71441	4.98549
Irf7	54123	-	interferon regulatory factor 7	9.53897	9.40378	9.53111	9.02634	7.57278	7.84748	5.9368	7.24853
Irf3	54131	C920001K05Rik|IRF-3	interferon regulatory factor 3	8.0102	8.19264	8.37735	8.0092	8.43785	8.41475	8.78289	8.72246
Icos	54167	AILIM|CCLP|CRP-1|H4|Ly115	inducible T cell co-stimulator	6.79833	7.55579	6.64429	6.53555	7.90293	7.61922	6.45138	7.47092
Ccrl2	54199	1810047I05Rik|Ackr5|CCR11|Cmkbr1l2|E01|L-CCR	chemokine (C-C motif) receptor-like 2	5.9045	6.09534	5.91597	5.954	7.15774	6.63968	6.24493	6.77904
Cd160	54215	AU045688|By55	CD160 antigen	3.55303	3.66907	3.75677	3.4583	4.83581	3.94936	5.71441	4.88596
Irgm2	54396	AI481100|GTPI|Ifggd2|Iigp2	immunity-related GTPase family M member 2	8.08522	8.12851	8.4535	8.07889	8.71496	8.50674	7.18834	7.96125
Tollip	54473	4930403G24Rik|4931428G15Rik	toll interacting protein	8.51043	8.50828	8.47923	8.71984	8.52565	8.71393	9.04433	8.33599
Mefv	54483	FMF|TRIM20|pyrin	Mediterranean fever	5.98967	6.32252	5.55032	5.88054	6.76542	6.53433	6.06805	6.98549
Dll4	54485	Delta4	delta-like 4 (Drosophila)	5.87496	5.17157	6.41973	5.954	6.90293	7.10464	6.40247	7.00934
Pdgfc	54635	1110064L01Rik|AI647969|PDGF-C	platelet-derived growth factor, C polypeptide	10.411	9.48819	10.3842	10.247	9.78335	9.63459	8.42713	9.0328
Tyk2	54721	JTK1	tyrosine kinase 2	6.38155	8.00595	7.52936	7.13186	8.4035	8.92039	9.55011	9.0616
Cxcl13	55985	4631412M08Rik|ANGIE2|Angie|BCA-1|BLC|BLR1L|Scyb13	chemokine (C-X-C motif) ligand 13	6.56541	5.45915	5.75677	4.81445	4.53096	4.29729	3.86641	4.0786
Msln	56047	MPF	mesothelin	8.56849	7.5312	9.4609	9.20031	9.14394	8.65484	8.32584	8.26843
Cxcl11	56066	Cxc11|H174|I-tac|Ip9|Itac|Scyb11|Scyb9b|b-R1|betaR1	chemokine (C-X-C motif) ligand 11	8.42637	9.53944	9.0811	8.7555	9.2444	9.36645	8.03634	9.25851
Il17b	56069	1110006O16Rik|1700006N07Rik|Zcyto7	interleukin 17B	6.15448	5.77061	6.69537	6.72734	6.98266	7.01349	7.61057	7.00934
Ccl24	56221	CKb-6|MPIF-2|Scya24	chemokine (C-C motif) ligand 24	2.78251	3.08411	1.43484	2.6218	5.19838	7.10464	6.49868	6.57046
Txnip	56338	1200008J08Rik|AA682105|Hyplip1|THIF|Tbp-2|VDUP1	thioredoxin interacting protein	9.80161	10.0463	9.62959	9.86294	10.2412	10.7707	10.2622	10.7439
Rrad	56437	REM3|Rad	Ras-related associated with diabetes	6.57769	6.29357	6.32561	5.56934	6.55202	6.89932	5.79241	5.66357
Tbk1	56480	1200008B05Rik|AI462036|AW048562	TANK-binding kinase 1	7.3244	7.47213	7.62466	7.3843	7.81854	7.56675	8.02022	8.05588
Ikbke	56489	AW558201|IKK-i|IKKepsilon|Ikki	inhibitor of kappaB kinase epsilon	7.1255	8.54968	8.3537	8.18731	9.1543	9.20074	9.87988	9.49646
Clec4n	56620	Clec6a|Clecsf10|Nkcl	C-type lectin domain family 4, member n	7.44659	7.11202	7.07869	6.954	8.9592	8.42657	6.12945	7.85996
Clec7a	56644	BGR|Clecsf12|beta-GR	C-type lectin domain family 7, member a	6.96651	6.62327	6.30931	6.60886	8.21828	8.04452	5.71441	7.26843
Tdo2	56720	AA407491|TDO|TO|chky	tryptophan 2,3-dioxygenase	1.5024	2.25404	2.65723	1.81445	2.02846	3.81186	3.54449	3.88596
Litaf	56722	3222402J11Rik|C85531|N4WBP3|TBX1	LPS-induced TN factor	8.27436	7.14481	7.95316	7.81445	7.80982	7.65986	6.79241	5.98549
Ccl28	56838	CCK1|MEC|Scya28	chemokine (C-C motif) ligand 28	2.39549	2.991	2.1718	2.27388	3.02846	3.65986	1.54449	2.66357
Cxcl14	57266	1110031L23Rik|1200006I23Rik|AI414372|BMAC|BRAK|KS1|Kec|MIP-2g|MIP2gamma|NJAC|Scyb14|bolekine	chemokine (C-X-C motif) ligand 14	7.61391	8.95909	8.02979	7.84235	8.41504	7.89932	9.37103	8.68593
Ppbp	57349	2400003M24Rik|AI854500|CTAP3|CTAPIII|Cxcl7|LA-PF4|LDGF|MDGF|NAP-2|NAP-2-L1|Scyb7|TGB|TGB1|THBGB1|b-TG1|beta-TG	pro-platelet basic protein	3.39549	3.17157	4.0978	2.90191	4.69142	4.65986	6.24493	5.40053
Isg20	57444	1600023I01Rik|2010107M23Rik|20kDa|DnaQL|HEM45	interferon-stimulated protein	8.66515	8.47213	8.72639	8.58759	8.36831	8.53978	7.29937	7.87302
Tbx21	57765	TBT1|Tbet|Tblym	T-box 21	3.21861	4.69882	4.0198	3.51489	4.53096	5.13379	5.63195	5.0786
Cd200r1	57781	CD200R|Mox2r|OX2R	CD200 receptor 1	6.17886	5.38789	5.73252	5.63463	5.83581	5.61922	4.86641	5.83349
Tnfrsf13b	57916	1200009E08Rik|Taci	tumor necrosis factor receptor superfamily, member 13b	5.43651	5.54354	5.43484	5.11823	5.53096	5.69939	5.54449	5.66357
Rsad2	58185	2510004L01Rik|Vig1|cig5	radical S-adenosyl methionine domain containing 2	7.33529	7.53944	8.06904	7.87514	6.37423	6.48993	6.35184	6.32653
Zbp1	58203	2010010H03Rik|Dai|Dlm1|mZaDLM	Z-DNA binding protein 1	10.4988	10.6573	10.8534	10.6015	10.0527	10.2664	9.12945	9.68593
Pdcd1lg2	58205	B7-DC|Btdc|F730015O22Rik|PD-L2	programmed cell death 1 ligand 2	5.30976	6.89789	5.49373	5.36904	7.90293	8.76606	8.03634	8.40053
Trem1	58217	-	triggering receptor expressed on myeloid cells 1	3.3389	2.89147	4.0198	4.59581	5.08735	4.48993	5.24493	4.88596
F12	58992	FXII|HAF	coagulation factor XII (Hageman factor)	1.86497	1.40604	0.849876	2.39941	2.76542	2.48993	3.12945	3.66357
Smpd3	58994	4631433G07Rik|AI427456|AW537966|fro|nSMase2	sphingomyelin phosphodiesterase 3, neutral	3.94297	5.44166	3.1718	5.44381	4.35039	5.34791	8.25873	6.53803
Il1rapl2	60367	-	interleukin 1 receptor accessory protein-like 2	2.5024	1.89147	0.849876	1.6218	2.4435	2.48993	4.54449	2.0786
Il21r	60504	NILR	interleukin 21 receptor	7.29124	7.86547	7.59134	7.1543	7.86976	7.74732	5.9368	7.26843
Il21	60505	IL-21	interleukin 21	2.01698	2.54354	2.1718	1.81445	3.02846	3.48993	3.12945	4.24853
Cd274	60533	A530045L16Rik|B7h1|Pdcd1l1|Pdcd1lg1|Pdl1	CD274 antigen	8.23614	9.29843	8.92402	8.68635	9.61592	9.89081	9.29268	9.93347
Cxcl16	66102	0910001K24Rik|AV290116|BB024863|CXCL16v1|CXCL16v2|SR-PSOX|Zmynd15|b2b498Clo	chemokine (C-X-C motif) ligand 16	10.643	10.1663	10.2518	10.076	10.5243	10.0954	8.68404	9.15006
Tab1	66513	2310012M03Rik|Map3k7ip1|b2b449Clo	TGF-beta activated kinase 1/MAP3K7 binding protein 1	7.58074	7.30328	7.89427	7.76282	7.97488	7.85625	8.06805	7.98549
Atg10	66795	5330424L23Rik|5430428K15Rik|AI852123|APG10|Agp10|Apg10l|Apg10p|Atg10l	autophagy related 10	5.73944	5.68402	6.0978	5.79173	5.65295	5.88225	6.29937	6.0786
Pycard	66824	9130417A21Rik|Asc|CARD5|TMS-1|TNS1|masc	PYD and CARD domain containing	4.86497	5.59191	4.89427	5.35361	3.61342	5.73786	6.63195	5.24853
Herc6	67138	1700121D12Rik|2510038N07Rik|4930427L17Rik|AI451296|CEB1|Herc5	hect domain and RLD 6	8.93226	8.33441	9.0198	8.60561	8.10171	7.88225	6.40247	7.123
Atg12	67526	4931423H11Rik|A330058M13Rik|Apg12l|Atg12l	autophagy related 12	7.40241	7.61549	7.47923	7.75403	7.71028	8.05979	7.47522	7.55434
Dusp6	67603	1300019I03Rik|MKP-3|MKP3|PYST1	dual specificity phosphatase 6	9.54054	9.6606	9.89153	9.70851	9.54416	9.72834	9.32584	9.63702
Anp32b	67628	2410015B15Rik|PAL31|PHAPI2a|Ssp29	acidic (leucine-rich) nuclear phosphoprotein 32 family, member B	11.1578	11.8264	11.5884	11.5231	11.9812	12.2831	12.8316	12.2905
Ifitm1	68713	1110036C17Rik|DSPA2a|Mil-2|Mil2	interferon induced transmembrane protein 1	5.46323	6.68402	6.0978	6.12733	5.4435	5.84748	6.06805	5.0786
Hspb2	69253	27kDa|2810021G24Rik|HSP27|MKBP	heat shock protein 2	7.79308	7.11753	7.99962	7.96165	7.59324	7.71875	7.45138	7.34539
C8g	69379	-	complement component 8, gamma polypeptide	2.28001	3.78455	3.93734	3.76864	3.25085	4.39682	4.12945	3.66357
Bst2	69550	2310015I10Rik|Bst-2|C87040|CD317|DAMP-1|GREG	bone marrow stromal cell antigen 2	12.0239	12.0869	12.4537	12.0397	11.9418	11.9519	10.9665	11.5319
Tnfsf13	69583	2310026N09Rik|April|Tall2|Trdl1	tumor necrosis factor (ligand) superfamily, member 13	4.08736	3.94209	3.30931	4.0239	3.76542	4.48993	4.71441	4.98549
Ifi35	70110	2010008K16Rik|AW986054|IFP35|ifi-35	interferon-induced protein 35	8.66803	8.0354	8.56755	8.30229	8.09455	8.19037	7.06805	7.38238
Cd3eap	70333	1190028F09|2610103M17Rik|ASE-1|Ase1|CAST|PAF49	CD3E antigen, epsilon polypeptide associated protein	5.89472	7.04411	6.84988	6.76864	7.33831	7.55602	8.27241	7.61776
Pnma1	70481	5730402C15Rik	paraneoplastic antigen MA1	2.39549	2.66907	3.43484	3.27388	3.4435	3.65986	2.54449	3.88596
Ifih1	71586	9130009C22Rik|Helicard|Hlcd|MDA5|RLR-2	interferon induced with helicase C domain 1	8.65939	8.0499	8.70474	8.33408	7.45472	7.19037	6.40247	6.88596
Chit1	71884	2300002L19Rik	chitinase 1 (chitotriosidase)	1.01698	4.21339	2.65723	6.01412	3.25085	3.94936	8.3389	3.66357
Tnfrsf13c	72049	2010006P15Rik|BAFF-R|Baffr|Bcmd|Bcmd-1|Bcmd1|Lvis22	tumor necrosis factor receptor superfamily, member 13c	2.5024	2.78455	2.84988	2.6218	3.76542	3.65986	4.35184	3.88596
Spink5	72432	2310065D10Rik|AV238912|LEKT1|LETK1|VAKT1	serine peptidase inhibitor, Kazal type 5	2.15448	4.17157	2.1718	4.36904	3.76542	2.81186	6.40247	2.66357
Tmem173	72512	2610307O08Rik|ERIS|MPYS|Mita|STING	transmembrane protein 173	7.44659	8.11202	7.79239	7.36904	8.38601	8.58797	7.90204	8.24853
Nfatc4	73181	3110041H08Rik|AW107667|AW546455|Nfat3	nuclear factor of activated T cells, cytoplasmic, calcineurin dependent 4	7.25729	7.37873	7.30109	7.04327	8.03595	8.42657	7.47522	7.85996
Irak3	73914	4833428C18Rik|AI563835|IRAK-M	interleukin-1 receptor-associated kinase 3	5.75033	5.47643	4.55032	5.04327	5.08735	5.44413	5.54449	5.60216
F13a1	74145	1200014I03Rik|AI462306|F13a	coagulation factor XIII, A1 subunit	7.95714	5.81203	6.89427	7.56264	5.76542	6.59846	6.24493	5.47092
Atg7	74244	1810013K23Rik|Agp7|Apg7l|Atg7l|Gm21553	autophagy related 7	7.1255	7.13396	7.33369	7.16318	7.30148	7.28435	6.71441	6.91149
Cyld	74256	2010013M14Rik|2900009M21Rik|C130039D01Rik|CDMT|CYLD1|EAC|mKIAA0849	cylindromatosis (turban tumor syndrome)	7.73122	7.46782	7.4273	7.56599	8.14394	7.94936	7.58888	7.69331
Slamf7	75345	19A|19A24|4930560D03Rik|CRACC|CS1	SLAM family member 7	6.78251	7.24398	6.30931	5.954	7.15774	7.32282	6.29937	6.60216
Cklf	75458	1700001C14Rik|1810018M11Rik|C32|CKLF1|CKLF3|CKLF4|CKLF5|Cklf2|Cklf6|HSPC224|UCK-1	chemokine-like factor	5.36747	6.25404	6.15366	5.85884	6.78335	6.59846	7.32585	6.91149
Il34	76527	2010004A03Rik|AI593503	interleukin 34	7.76114	7.78108	7.91597	8.18949	8.05083	8.43245	9.09138	8.25851
Cyfip2	76884	1500004I01Rik|6430511D02Rik|AA930218|AU022376|Pir121|mKIAA1168	cytoplasmic FMR1 interacting protein 2	7.06137	7.75654	6.93734	6.82007	7.36236	7.13379	6.49868	6.96125
Atg16l1	77040	1500009K01Rik|Apg16l|Atg16l|WDR30	autophagy related 16-like 1 (S. cerevisiae)	7.66371	7.02075	7.89972	7.47266	7.50959	7.02909	6.9368	7.16607
Ulbp1	77777	A430108B07Rik|MULT1	UL16 binding protein 1	6.65505	7.01485	6.93734	6.67243	6.69142	6.44413	6.45138	6.53803
Icam4	78369	1810015M19Rik|Cd242|ICAM-4	intercellular adhesion molecule 4, Landsteiner-Wiener blood group	2.01698	2.25404	2.43484	1.39941	3.02846	4.07489	4.35184	1.0786
Ifitm2	80876	DSPA2c|Ifitm3l|fragilis3|mil-3	interferon induced transmembrane protein 2	11.1836	10.7975	11.0434	11.1546	10.9273	11.2059	10.7948	10.5982
Cxcr6	80901	BB217514|BONZO|STRL33	chemokine (C-X-C motif) receptor 6	7.49595	8.27146	7.63778	7.4655	8.34436	8.12656	7.61057	7.63319
Tlr9	81897	-	toll-like receptor 9	7.08306	7.11753	7.02978	6.67243	6.86976	6.48993	5.9368	6.123
Il23a	83430	IL-23|p19	interleukin 23, alpha subunit p19	1.01698	2.25404	1.84988	1.39941	2.4435	2.81186	4.12945	4.0786
Trem2	83433	TREM-2|Trem2a|Trem2b|Trem2c	triggering receptor expressed on myeloid cells 2	8.43651	8.77061	8.84988	8.89393	8.90702	8.90779	8.96234	8.8665
Jam3	83964	1110002N23Rik|JAM-3|JAM-C|Jcam3	junction adhesion molecule 3	6.01697	5.68402	5.97916	5.4583	5.90293	5.48993	4.54449	5.40053
Mcam	84004	1-gicerin|AV025631|CD146|CD149|Muc18|s-endo|s-gicerin	melanoma cell adhesion molecule	8.92747	8.16892	9.36163	8.82847	9.34738	9.62692	8.55571	9.12845
Hamp	84506	Hamp1|Hepc|Hepc1	hepcidin antimicrobial peptide	3.3389	2.78455	2.84988	3.13638	3.25085	1.48993	3.54449	3.0786
Cd96	84544	1700109I12Rik|Tactile	CD96 antigen	2.78251	3.54354	3.1718	2.98437	4.02846	3.65986	3.86641	4.24853
Cd163	93671	CD163v2|CD163v3	CD163 antigen	5.30976	4.44166	4.0978	4.13638	4.76542	5.39682	4.35184	4.98549
Il24	93672	FISP|Mda-7|Mda7|St16	interleukin 24	2.15448	1.40604	3.0198	1.6218	3.61342	3.0749	4.12945	3.66357
Klra20	93967	Ly49t	killer cell lectin-like receptor subfamily A, member 20	2.39549	1.66907	2.84988	2.27388	3.76542	3.94936	5.9368	4.77904
Klra21	93968	Klra-ps1|Ly49H|Ly49u	killer cell lectin-like receptor subfamily A, member 21	2.69505	2.08411	2.43484	2.51489	3.25085	3.0749	3.54449	3.88596
Ifi44	99899	A430056A10Rik|AW261460|MTAP44|p44	interferon-induced protein 44	9.59818	8.96828	9.82286	9.3652	8.23791	7.84748	6.06805	7.45364
Cd276	102657	6030411F23Rik|AU016588|B7RP-2|B7h3	CD276 antigen	8.79439	8.48286	8.89972	8.74961	8.62837	8.86497	7.63195	7.69331
Nup107	103468	AW541137|C76801	nucleoporin 107	7.95479	8.05853	8.1718	7.95911	8.07285	7.69939	7.71441	7.48799
Dock9	105445	AA959601|AW538057|B230309H04Rik|D14Wsu89e|Zizimin1|mKIAA1058	dedicator of cytokinesis 9	6.98967	8.12303	7.79239	7.55254	8.43785	8.79827	9.09907	9.31701
Ticam1	106759	AW046014|AW547018|TICAM-1|TRIF	toll-like receptor adaptor molecule 1	5.8346	6.01485	5.80407	5.98437	6.22486	6.5774	6.63195	6.72246
Il1rl2	107527	AI481289|AW551444|IL-1Rrp2	interleukin 1 receptor-like 2	6.29496	6.36024	5.70786	6.26566	5.93535	5.84748	7.45138	5.47092
Nod1	107607	C230079P11|Card4|F830007N14Rik|Nlrc1	nucleotide-binding oligomerization domain containing 1	7.3171	8.84898	8.21182	7.94373	9.06555	9.42951	10.1332	9.61776
Usp9y	107868	Dffry|Fafl2	ubiquitin specific peptidase 9, Y chromosome	1.28001	1.08411	1.84988	1.39941	2.76542	2.48993	3.54449	3.0786
Epsti1	108670	2310046K10Rik|5033415K03Rik|BRESI1	epithelial stromal interaction 1 (breast)	2.01698	1.40604	1.43484	2.39941	2.4435	0.489933	3.54449	3.66357
Card11	108723	0610008L17Rik|2410011D02Rik|BIMP3|CARMA1	caspase recruitment domain family, member 11	5.5024	6.8523	5.65723	5.58263	7.01335	6.86497	7.45138	7.52155
Irak2	108960	6330415L08Rik|AI649099|IRAK-2	interleukin-1 receptor-associated kinase 2	7.04378	7.41503	7.35767	7.59581	7.90293	7.61922	8.03634	8.05588
Itga1	109700	CD49A|E130012M19Rik|Vla1	integrin alpha 1	6.65505	6.70616	6.65723	6.42916	6.65295	7.42067	6.54449	7.14469
C7	109828	A530026G17|Gm1238	complement component 7	1.86497	1.66907	0.849876	2.81445	2.4435	2.81186	1.54449	3.40053
Syt17	110058	Bk	synaptotagmin XVII	4.12131	4.08411	4.60476	4.33801	5.02846	5.07489	5.24493	5.53803
Pmch	110312	A230109K23Rik	pro-melanin-concentrating hormone	1.28001	1.08411	2.84988	2.27388	3.02846	2.48993	1.54449	3.0786
C8b	110382	4930439B20Rik|AI595927	complement component 8, beta polypeptide	4.44993	3.54354	3.1718	3.13638	3.61342	2.81186	4.35184	3.66357
Lyve1	114332	1200012G08Rik|Crsbp-1|Lyve-1|Xlkd1	lymphatic vessel endothelial hyaluronan receptor 1	4.47641	2.54354	2.84988	2.39941	2.4435	1.48993	3.86641	3.66357
Tirap	117149	AA407980|C130027E04Rik|Mal|Tlr4ap|Wyatt	toll-interleukin 1 receptor (TIR) domain-containing adaptor protein	6.5024	6.24398	6.47923	6.576	6.50959	6.59846	6.58888	6.63319
Cspg4	121021	4732461B14Rik|AN2|NG2	chondroitin sulfate proteoglycan 4	4.71741	6.24398	6.11666	5.86973	5.57278	6.46721	7.49868	7.14469
Colec12	140792	CL-P1|SRCL|Scara4	collectin sub-family member 12	8.57922	7.53532	7.99962	8.08358	6.83581	7.16236	5.35184	5.60216
Il25	140806	IL-17e|Il17e	interleukin 25	2.39549	2.66907	3.55032	2.39941	3.4435	3.29729	3.54449	3.40053
Tlr3	142980	AI957183	toll-like receptor 3	6.73397	6.42396	6.87224	6.58924	6.19838	6.48993	6.06805	6.47092
Klra17	170733	Ly49q|Ly49q1	killer cell lectin-like receptor, subfamily A, member 17	5.3389	5.40604	4.60476	3.81445	4.14394	4.19037	4.54449	4.40053
Tlr7	170743	-	toll-like receptor 7	6.81917	6.3415	6.61806	6.47978	5.69142	5.73786	5.12945	5.0786
Tlr8	170744	-	toll-like receptor 8	8.48946	8.07847	8.41973	8.24281	7.77441	7.69939	6.79241	7.20789
Cd209e	170780	SIGNR4|mSIGNR4	CD209e antigen	1.86497	2.78455	3.84988	1.39941	4.02846	3.29729	4.12945	3.66357
Havcr2	171285	TIM-3|Tim3|Timd3	hepatitis A virus cellular receptor 2	3.44993	3.72797	4.1718	3.94373	3.61342	4.5774	3.12945	3.40053
Ripk2	192656	2210420D18Rik|CARD3|CARDIAK|CCK|D4Bwg0615e|RICK|RIP2	receptor (TNFRSF)-interacting serine-threonine kinase 2	5.98045	5.36951	5.73252	6.0239	5.4435	4.48993	5.35184	4.77904
Itgb4	192897	AA407042|C230078O20|CD104	integrin beta 4	5.98967	6.64635	6.72024	6.85884	6.80105	7.28435	8.80187	7.60216
Btla	208154	A630002H24	B and T lymphocyte associated	5.8346	6.74232	5.89427	5.11823	7.42078	8.00563	8.02022	7.64846
Tfe3	209446	F830016E06Rik|Tcfe3|Tfe-3|bHLHe33	transcription factor E3	6.93822	6.95448	6.87224	6.92819	7.04341	7.13379	6.54449	6.57046
Il23r	209590	IL-23R	interleukin 23 receptor	2.28001	3.25404	1.84988	2.13638	3.02846	3.29729	3.54449	3.0786
Ythdf2	213541	9430020E02Rik|HGRG8|NY-REN-2	YTH domain family 2	8.23032	8.13939	8.07869	8.16096	8.07285	8.07489	8.11434	7.93658
Sbno2	216161	BC019206|F730040C21|Sno|Stno	strawberry notch homolog 2 (Drosophila)	7.91663	8.49138	8.37735	8.23441	8.84864	9.40581	9.11434	9.11752
Nlrp3	216799	AGTAVPRL|AII/AVP|Cias1|FCAS|FCU|MWS|Mmig1|NALP3|Pypaf1	NLR family, pyrin domain containing 3	5.86497	6.25404	6.98943	6.82007	6.88644	7.27129	5.63195	6.53803
Mpped1	223726	6230403M19|AW456965|D15Bwg0669e	metallophosphoesterase domain containing 1	1.28001	1.66907	0.849876	1.39941	1.4435	0.489933	2.54449	2.0786
Ticam2	225471	B430113A10|TICAM-2|TRAM|Tirp|Trif	toll-like receptor adaptor molecule 2	6.3171	6.19264	5.70786	5.74519	6.19838	6.34791	5.24493	4.88596
Cxcr1	227288	Il8ra	chemokine (C-X-C motif) receptor 1	2.39549	0.0841118	1.43484	0.814448	0.443497	2.48993	2.54449	1.0786
Mavs	228607	D430028G21Rik|IPS-1|Visa|cardif	mitochondrial antiviral signaling protein	7.21468	7.37873	7.25076	7.28612	7.35039	7.52336	7.58888	7.47092
Gbp5	229898	5330409J06Rik|Gbp5a	guanylate binding protein 5	9.07659	10.0578	9.47558	9.37095	10.5203	10.556	9.33239	10.1474
Ddx58	230073	6430573D20Rik|C330021E21|RIG-I|RLR-1	DEAD (Asp-Glu-Ala-Asp) box polypeptide 58	9.76718	9.23513	9.80116	9.5364	9.07649	8.95346	7.88434	8.70065
C8a	230558	-	complement component 8, alpha polypeptide	1.28001	1.66907	2.84988	1.6218	2.4435	3.48993	3.86641	2.66357
Il22ra1	230828	9130219A07Rik|ENSMUSG00000073746|IL-22R|Il22r	interleukin 22 receptor, alpha 1	2.01698	4.47643	3.55032	4.79173	3.61342	3.29729	7.35184	4.53803
Tnfrsf14	230979	Atar|HveA|Hvem|Tnfrs14	tumor necrosis factor receptor superfamily, member 14 (herpesvirus entry mediator)	8.37629	9.93664	9.03227	8.80739	10.19	10.522	10.371	10.4427
Oasl1	231655	7530414C13Rik|oasl9	2'-5' oligoadenylate synthetase-like 1	7.34968	7.9759	7.84988	7.83959	6.08735	6.27129	6.18834	6.32653
Creb5	231991	Crebpa|D430026C09Rik	cAMP responsive element binding protein 5	5.54054	5.77061	5.93734	5.98437	6.08735	6.5774	6.40247	5.77904
A2m	232345	A2mp	alpha-2-macroglobulin	3.82433	3.66907	3.75677	1.6218	4.25085	3.94936	5.00392	4.66357
Lilra5	232801	E030017K20|EG232801|Gm4878|Lilrc1	leukocyte immunoglobulin-like receptor, subfamily A (with TM domain), member 5	4.62578	3.60767	4.24219	3.90191	4.4435	5.07489	4.86641	4.88596
Gtf3c1	233863	-	general transcription factor III C 1	7.54367	7.25904	7.59807	7.47623	7.8272	7.38475	6.97075	7.10097
Ddx60	234311	9830118M07	DEAD (Asp-Glu-Ala-Asp) box polypeptide 60	7.72571	8.76359	8.74772	8.50445	7.93535	8.2314	8.02022	8.23847
Fez1	235180	UNC-76|UNC76	fasciculation and elongation protein zeta 1 (zygin I)	2.78251	2.78455	3.75677	2.81445	3.4435	3.94936	2.54449	3.0786
Il22ra2	237310	CRF2-10|CRF2-s1|CRF2X|Il-22bp	interleukin 22 receptor, alpha 2	2.5024	3.08411	2.84988	3.51489	4.69142	4.48993	5.45138	5.16607
Lamp3	239739	1200002D17Rik|Cd208|DC-LAMP|DCLAMP|LAMP|TSC403	lysosomal-associated membrane protein 3	0.695047	0.0841118	1.84988	1.6218	3.02846	2.81186	3.86641	2.66357
Tnfsf18	240873	Gitrl	tumor necrosis factor (ligand) superfamily, member 18	4.08736	3.40604	4.1718	3.33801	4.61342	4.94936	5.12945	5.40053
Mill2	243864	Micb	MHC I like leukocyte 2	4.57769	4.96675	5.5223	5.00427	4.76542	5.24482	6.29937	5.93658
Fcgr4	246256	4833442P21Rik|CD16-2|FcgRIV|FcgammaRIV|Fcgr3a|Fcrl3	Fc receptor, IgG, low affinity IV	8.69786	8.33914	8.99198	8.50095	7.65295	7.2314	5.54449	6.40053
Cd207	246278	-	CD207 antigen	3.73944	4.54354	4.84988	5.00427	6.46586	7.2314	8.31267	7.00934
Oas3	246727	Oasl10	2'-5' oligoadenylate synthetase 3	5.54054	5.74232	6.22492	5.54237	4.69142	5.34791	5.54449	4.66357
Oas2	246728	Oasl11	2'-5' oligoadenylate synthetase 2	8.45494	8.88663	9.16049	8.52181	7.38601	7.34791	7.03634	7.79285
Il27	246779	IL-27|IL-27p28|Il30|p28	interleukin 27	2.5024	2.991	3.1718	2.13638	2.76542	3.0749	3.12945	1.0786
Il17f	257630	C87042|IL-17F	interleukin 17F	1.01698	1.66907	2.43484	1.13638	2.02846	2.0749	3.54449	2.0786
Nod2	257632	ACUG|BLAU|CD|Card15|F830032C23Rik|IBD1|Nlrc2	nucleotide-binding oligomerization domain containing 2	3.73944	4.917	4.93734	4.94373	5.61342	5.84748	6.63195	5.53803
Irak4	266632	8430405M07Rik|9330209D03Rik|IRAK-4|NY-REN-64	interleukin-1 receptor-associated kinase 4	7.83715	7.15557	7.5223	7.33408	7.60337	7.39682	6.67377	7.00934
Amica1	270152	AMICA|Crea7|Gm638|Jaml	adhesion molecule, interacts with CXADR antigen 1	6.98045	7.5312	6.78061	6.39941	7.9592	7.77533	7.29937	7.91149
Timd4	276891	B430010N18Rik|TIM-4|Tim4	T cell immunoglobulin and mucin domain containing 4	4.62578	4.25404	4.37344	3.90191	4.69142	4.65986	4.54449	4.53803
Dusp4	319520	2700078F24Rik|AI844617|BB104621|E130306H24Rik|MKP2	dual specificity phosphatase 4	5.98045	6.31293	6.32561	6.50794	7.35039	7.3603	6.29937	7.45364
Gpr183	321019	Ebi2	G protein-coupled receptor 183	6.20284	5.29357	5.87224	5.55592	5.30148	5.44413	5.00392	5.0786
Tnfsf15	326623	Tl1|Tl1a|Vegi	tumor necrosis factor (ligand) superfamily, member 15	2.60194	4.21339	2.43484	2.39941	3.76542	3.29729	4.54449	3.40053
Xaf1	327959	Fbox39	XIAP associated factor 1	9.42041	9.80777	10.0236	9.68712	9.92126	10.0749	9.40247	9.79285
Ep300	328572	A430090G16|A730011L11|KAT3B|p300|p300 HAT	E1A binding protein p300	8.68657	8.58396	8.53987	8.75403	8.46586	8.66486	8.32584	8.15542
Il19	329244	-	interleukin 19	2.01698	2.08411	2.1718	2.27388	4.25085	3.48993	3.86641	4.0786
Cxcl3	330122	Dcip1|Gm1960	chemokine (C-X-C motif) ligand 3	2.01698	1.66907	2.1718	2.13638	5.08735	3.94936	1.54449	4.0786
Ifnl2	330496	EG330496|IL-28A|Il28a	interferon lambda 2	1.01698	1.66907	2.65723	1.98437	1.4435	2.48993	4.35184	2.66357
Card9	332579	Gm782	caspase recruitment domain family, member 9	4.5024	4.51038	4.30931	4.09985	4.4435	5.07489	4.86641	4.40053
Cd59b	333883	-	CD59b antigen	3.15448	3.17157	4.0978	3.4583	4.53096	4.19037	5.86641	5.0786
Nlrc5	434341	AI451557|AK220210|NOD27	NLR family, CARD domain containing 5	8.52001	9.19916	8.99962	8.93728	9.11592	9.23477	9.24493	9.40503
Ccl26	541307	Ccl26l	chemokine (C-C motif) ligand 26	2.78251	2.40604	2.84988	1.6218	2.76542	2.81186	4.35184	2.66357
Klra27	639946	Ly49e/c2	killer cell lectin-like receptor, subfamily A, member 27	3.01698	3.25404	3.84988	4.172	3.02846	3.65986	2.54449	3.66357
Cd99	673094	1110061M03Rik|2410026K10Rik|D4|Pilr-l|pilr-1	CD99 antigen	7.47641	9.06425	8.32966	8.15652	9.93334	10.5694	10.4958	10.4118
Isg15	100038882	G1p2|IGI15|IP17|Irfp|UCRP	ISG15 ubiquitin-like modifier	9.45992	9.3672	9.73862	9.51749	8.59324	8.70425	7.03634	7.66357
Tigit	100043314	ENSMUSG00000071552|Vstm3	T cell immunoreceptor with Ig and ITIM domains	5.78251	6.08411	5.60476	4.76864	6.59324	6.86497	6.35184	6.32653
Klrb1	100043861	4930431A04Rik|Gm4696|Klrb1g|Klrb6|Ly-55|Ly55|NKR-P1G|Nkrp-1e|Nkrp1g	killer cell lectin-like receptor subfamily B member 1	2.01698	1.66907	2.43484	2.27388	4.02846	4.39682	5.45138	4.88596
Tpsab1	100503895	MMCP-7|Mcp-7|Mcp7|Mcpt7	tryptase alpha/beta 1	4.12131	3.94209	5.24219	4.48687	5.08735	5.01349	5.45138	5.47092
H2-Ea-ps	100504404	AI323765|E-alpha-f|H-2Ea|H2-Ea|I-Ealpha|Ia-3|Ia3|MHC-H2-Ea	histocompatibility 2, class II antigen E alpha, pseudogene	8.63756	9.33085	8.34573	8.39753	8.73812	8.94526	8.35184	8.8795
