# Supplementary material for: Kindlin-1 regulates IL-6 secretion and modulates the immune environment in breast cancer models
Source: eLife. 2023 Mar 8;12:e85739. doi: 10.7554/eLife.85739 (PMC10023156; doi:10.7554/eLife.85739)
Supplement: Source data 2. [file elife-85739-data2.csv]

Nanostring immune exhaustion panel of isolated CD45+ cells from MET-01 tumours at Day 10
Name	Gene ID	Alias	Description	20210317_2021NANO0011_NULL 4 TUM_06.RCC	20210317_2021NANO0011_WT 3 TUM_02.RCC	20210317_2021NANO0011_WT 5 TUM_03.RCC	20210317_2021NANO0011_WT1 TUM_01.RCC	20210317_2021NANO0011_NULL 1 TUM_04.RCC	20210317_2021NANO0011_NULL 2 TUM_05.RCC
Acadl	11363	AA960361|AU018452|C79855|LCAD	acyl-Coenzyme A dehydrogenase, long-chain	10.37	10.0707	9.99363	10.103	10.0314	10.3107
Acadvl	11370	vlcad	acyl-Coenzyme A dehydrogenase, very long chain	9.61117	9.25974	9.32905	9.42534	9.39107	9.5402
Adh1	11522	ADH-AA|AI194826|Adh-1|Adh-1-t|Adh-1e|Adh-1t|Adh-3e|Adh1-e|Adh1-t|Adh1tl|Adh3-e	alcohol dehydrogenase 1 (class I)	6.68518	7.32538	7.36798	7.72799	7.19916	6.86897
Adora2a	11540	A2AAR|A2aR|AA2AR	adenosine A2a receptor	7.74868	8.27586	7.97833	8.33942	8.48064	8.38778
Adora2b	11541	A2BAR|A2BR|A2b|AA2BR|AI480866|AI605384	adenosine A2b receptor	6.23114	6.96533	7.56702	7.23049	7.29007	6.83213
Angpt1	11600	1110046O21Rik|Ang-1|Ang1	angiopoietin 1	6.32672	4.43608	4.9213	4.64552	5.42657	6.99652
Ahr	11622	Ah|Ahh|Ahre|In|bHLHe76	aryl-hydrocarbon receptor	9.13935	8.22931	8.39337	8.07376	8.32273	8.59986
Ak4	11639	AK 4|Ak-3|Ak-4|Ak3|Ak3l1|D4Ertd274e	adenylate kinase 4	5.43364	5.97665	5.94438	5.68734	6.08953	5.01854
Akt1	11651	Akt|PKB|PKB/Akt|PKBalpha|Rac	thymoma viral proto-oncogene 1	10.5756	10.6658	10.6865	10.4903	10.714	10.4839
Akt2	11652	2410016A19Rik|AW554154|PKB|PKBbeta	thymoma viral proto-oncogene 2	10.168	10.1403	9.97273	10.3046	10.1515	10.1627
Aldh1a1	11668	Ahd-2|Ahd2|Aldh1|Aldh1a2|E1|Raldh1	aldehyde dehydrogenase family 1, subfamily A1	5.36325	5.43608	4.9213	5.72799	4.9005	5.92835
Aldh3a1	11670	Ahd-4|Ahd4|Aldh|Aldh3	aldehyde dehydrogenase family 3, subfamily A1	2.84867	3.43608	4.13703	2.55806	3.71607	3.88104
Aldoa	11674	Aldo-1|Aldo1	aldolase A, fructose-bisphosphate	13.1562	14.2274	14.2027	14.5509	14.2679	13.676
Alox5	11689	5-LO|5-LOX|5LO|5LX|AI850497|F730011J02	arachidonate 5-lipoxygenase	9.83736	9.6614	9.76152	9.63488	9.37038	9.83834
Amh	11705	MIS	anti-Mullerian hormone	3.36325	3.67709	3.9671	3.72799	3.57857	2.7815
Fabp4	11770	422/aP2|ALBP/Ap2|Ap2|Lbpl	fatty acid binding protein 4, adipocyte	12.2308	9.51775	10.46	9.04991	10.3481	12.7367
Xiap	11798	1110015C02Rik|Aipa|Api3|Birc4|IAP3|ILP-1|MIHA	X-linked inhibitor of apoptosis	10.802	11.1104	10.9544	11.0668	10.6965	10.9115
Apoc3	11814	apo-CIII|apoC-III	apolipoprotein C-III	2.84867	3.67709	3.13703	3.55806	3.25664	3.43358
Aqp1	11826	CHIP28	aquaporin 1	9.69416	8.84083	9.58181	8.45288	8.60094	10.3372
Aqp7	11832	AQP7L|AQPap	aquaporin 7	7.0966	3.67709	4.55207	4.01749	4.71607	7.23154
Arg1	11846	AI|AI256583|Arg-1|PGIF	arginase, liver	9.86628	12.7592	13.2249	13.1086	13.1876	11.5787
Atf4	11911	Atf-4|C/ATF|CREB2|TAXREB67	activating transcription factor 4	12.0024	11.8462	11.9096	11.8873	11.8759	11.9185
Atm	11920	AI256621|C030026E19Rik	ataxia telangiectasia mutated	8.03	8.3342	8.32466	8.05791	7.64035	7.89301
Atp2a2	11938	9530097L16Rik|D5Wsu150e|SERCA2|SERCA2B|Serca2a|mKIAA4195	ATPase, Ca++ transporting, cardiac muscle, slow twitch 2	11.8758	11.6965	11.7929	11.6861	11.7334	11.7353
Atp7a	11977	MNK	ATPase, Cu++ transporting, alpha polypeptide	9.99987	11.1782	11.0552	11.0678	10.4624	10.4284
Bak1	12018	Bak|N-BAK1|N-Bak	BCL2-antagonist/killer 1	10.1564	10.9816	10.9797	11.2919	10.7977	10.3006
Bax	12028	-	BCL2-associated X protein	8.76924	9.2222	9.05457	9.42534	8.97432	8.70207
Bcl2	12043	AW986256|Bcl-2|C430015F12Rik|D630044D05Rik|D830018M01Rik	B cell leukemia/lymphoma 2	7.63378	7.98227	8.07039	7.9331	7.62296	7.69525
Bcl2l1	12048	Bcl(X)L|Bcl-XL|Bcl2l|BclX|bcl-x|bcl2-L-1	BCL2-like 1	9.0186	10.2701	10.0359	10.0836	9.83218	9.42948
Bcl6	12053	Bcl5	B cell leukemia/lymphoma 6	7.84867	8.83774	8.88298	8.75773	8.47581	8.09309
Bid	12122	2700049M22Rik|AI875481|AU022477	BH3 interacting domain death agonist	8.97501	9.3342	8.9501	9.31628	8.88235	9.11881
Prdm1	12142	Blimp-1|Blimp1|PRDI-BF1|ZNFPR1A1|b2b1765Clo	PR domain containing 1, with ZNF domain	6.76924	8.32538	7.89192	8.39726	8.038	7.74894
Blk	12143	-	B lymphoid kinase	4.50075	4.14657	3.87399	4.14302	4.25664	4.36647
Bmp2	12156	AI467020|Bmp2a	bone morphogenetic protein 2	7.78279	6.85929	7.19592	7.27231	7.18738	8.04024
Bmp8b	12164	Op3	bone morphogenetic protein 8b	3.36325	3.88354	4.21503	3.36542	3.71607	3.67459
Zfp36l2	12193	Brf2|ERF2|Tis11d	zinc finger protein 36, C3H type-like 2	9.88367	9.92502	10.0691	9.94176	9.74649	9.94713
Btk	12229	AI528679|xid	Bruton agammaglobulinemia tyrosine kinase	9.45071	10.343	10.2606	10.3345	10.0608	9.79592
Btrc	12234	Beta-Trcp1|E3RS-IkappaB|E3RSIkappaB|FWD1|Fbw1a|HOS|Slimb|b-TrCP|beta-TrCP	beta-transducin repeat containing protein	7.53317	7.53124	7.4749	7.21627	7.11462	7.69525
Ciita	12265	C2ta|EG669998|Gm9475|Mhc2ta	class II transactivator	9.39005	9.74649	9.93721	9.84115	9.71812	9.76857
Cacnb2	12296	AW060387|CAB2|Cavbeta2|Cchb2	calcium channel, voltage-dependent, beta 2 subunit	5.74176	5.97665	5.84975	6.08162	6.36517	5.97415
Cacnb4	12298	3110038O15Rik|Cchb4|lh	calcium channel, voltage-dependent, beta 4 subunit	4.12878	4.6205	3.66754	4.72799	3.95708	4.22208
Calm1	12313	AI256814|AI327027|AI461935|AL024000|CaM|Calm	calmodulin 1	12.9542	13.5422	13.4902	13.7431	13.4965	13.1373
Casp3	12367	A830040C14Rik|AC-3|Apopain|CASP-3|CC3|CPP-32|CPP32|Caspase-3|Lice|SCA-1|Yama|mldy	caspase 3	10.01	10.1441	10.0782	10.5353	10.0248	10.1163
Casp8	12370	CASP-8|FLICE|MACH|Mch5	caspase 8	10.6235	11.2672	11.2019	11.2172	11.099	10.8484
Casp9	12371	AI115399|APAF-3|AW493809|CASP-9|Caspase-9|ICE-LAP6|Mch6	caspase 9	6.48426	6.85929	6.76152	7.001	6.9005	6.98538
Cbl	12402	4732447J05Rik|Cbl-2|c-Cbl|cbl	Casitas B-lineage lymphoma	8.9809	9.61146	9.71025	9.41293	8.99811	9.31622
Ccna1	12427	-	cyclin A1	2.04132	2.784	3.42653	3.72799	3.25664	3.14407
Ccnt1	12455	2810478G24Rik|AI115585|CycT1	cyclin T1	9.38783	9.32094	9.4489	9.2234	9.10526	9.25492
Cd14	12475	-	CD14 antigen	11.9144	12.6773	12.6619	12.2839	12.4092	12.0369
Ctla4	12477	Cd152|Ctla-4|Ly-56	cytotoxic T-lymphocyte-associated protein 4	8.28449	9.70287	9.34865	10.3492	9.88782	9.66764
Cd19	12478	AW495831	CD19 antigen	3.84867	4.29858	4.21503	5.14302	4.64896	4.29608
Ms4a1	12482	AA960661|Cd20|Ly-44|Ms4a2	membrane-spanning 4-domains, subfamily A, member 1	4.21124	4.43608	4.21503	4.80599	5.21084	4.97415
Cd22	12483	A530093D23|Lyb-8|Lyb8	CD22 antigen	6.97206	7.61327	7.32466	7.20192	8.07042	7.70886
Cd28	12487	-	CD28 antigen	7.66337	8.83152	8.68135	9.12411	8.64896	8.95143
Cd33	12489	Siglec-3|gp67	CD33 antigen	9.11546	10.1188	10.017	9.71035	9.7344	9.5383
Cd38	12494	ADPRC 1|Cd38-rs1|I-19	CD38 antigen	8.90241	9.24343	8.88597	9.62415	8.96745	8.93993
Entpd1	12495	2610206B08Rik|AA408691|Cd39|NTPDase-1	ectonucleoside triphosphate diphosphohydrolase 1	10.9639	11.3903	11.4438	11.5665	11.3381	11.1111
Entpd2	12496	Cd39l1|NTPDase2	ectonucleoside triphosphate diphosphohydrolase 2	5.84867	4.36897	4.05457	3.55806	4.7802	5.72904
Cd3d	12500	T3d	CD3 antigen, delta polypeptide	7.96613	8.76455	8.18627	9.88449	9.56952	9.3339
Cd3e	12501	AI504783|CD3|CD3epsilon|T3e	CD3 antigen, epsilon polypeptide	7.62628	8.87751	8.35081	9.58597	9.13623	9.07481
Cd3g	12502	Ctg-3|Ctg3|T3g	CD3 antigen, gamma polypeptide	9.0186	10.0468	9.514	10.579	10.4215	10.2233
Cd4	12504	L3T4|Ly-4	CD4 antigen	9.01573	9.60236	9.27999	9.93093	9.98966	9.9152
Cd48	12506	AI449234|AW610730|BCM1|BLAST|BLAST-1|BLAST1|Bcm-1|MEM-102|SLAMF2|Sgp-60	CD48 antigen	11.2514	11.696	11.5735	12.0394	11.6965	11.6153
Cd5	12507	Ly-1|Ly-12|Ly-A|Lyt-1	CD5 antigen	7.14984	8.92209	8.42243	9.34922	8.99811	8.71898
Cd6	12511	-	CD6 antigen	6.78279	8.53507	8.13703	9.00927	8.74448	8.392
Cd68	12514	Lamp4|Scard1|gp110	CD68 antigen	12.7024	13.2519	13.2255	13.309	13.2552	13.0122
Cd69	12515	5830438K24Rik|AI452015|AIM|VEA	CD69 antigen	6.62628	8.69089	8.46695	9.18377	8.84536	8.01307
Cd72	12517	CD72c|Ly-19|Ly-32|Ly-m19|Lyb-2	CD72 antigen	3.36325	3.88354	2.28903	4.01749	4.25664	3.55911
Cd80	12519	B71|Cd28l|Ly-53|Ly53|MIC17|TSA1	CD80 antigen	8.58435	9.31204	9.35081	8.97169	8.60537	8.93705
Cd84	12523	A130013D22Rik|CDw84|SLAMF5	CD84 antigen	11.0064	12.1216	12.0701	12.1025	12.0716	11.7399
Cd86	12524	B7|B7-2|B7.2|B70|CLS1|Cd28l2|ETC-1|Ly-58|Ly58|MB7|MB7-2|TS/A-2	CD86 antigen	10.205	10.6358	10.6684	10.6429	10.4539	10.4397
Cd8a	12525	BB154331|Ly-2|Ly-35|Ly-B|Lyt-2	CD8 antigen, alpha chain	4.50075	6.26205	5.66754	6.91561	6.57857	6.06161
Cd8b1	12526	Cd8b|Ly-3|Ly-C|Lyt-3	CD8 antigen, beta chain 1	5.62628	7.51581	7.03319	8.17277	7.47581	6.95143
Cdc25a	12530	D9Ertd393e	cell division cycle 25A	8.84222	8.69432	8.63599	8.72799	8.52343	8.34919
Cdc42	12540	AI747189|AU018915	cell division cycle 42	14.2546	14.5635	14.4591	14.935	14.6275	14.3882
Cdh1	12550	AA960649|E-cad|Ecad|L-CAM|UVO|Um	cadherin 1	11.3856	8.90738	9.44081	8.94176	9.86767	10.6279
Cdkn1c	12577	AL024410|CDKI|Kip2|p57(kip2)|p57Kip2	cyclin-dependent kinase inhibitor 1C (P57)	6.41636	4.6205	4.21503	1.55806	5.16353	5.466
Cdkn2c	12580	C77269|INK4c|p18|p18-INK4c|p18-INK6|p18INK4c	cyclin-dependent kinase inhibitor 2C (p18, inhibits CDK4)	8.9809	9.10077	9.12698	9.36219	9.038	8.79113
Cdyl	12593	AI325931	chromodomain protein, Y chromosome-like	8.23608	8.53124	8.4828	8.4947	8.19328	8.31845
Cebpb	12608	C/EBPbeta|CRP2|IL-6DBP|LAP|LIP|NF-IL6|NF-M|Nfil6	CCAAT/enhancer binding protein (C/EBP), beta	11.8523	12.1683	12.31	12.1322	12.1208	12.0151
Cebpd	12609	-	CCAAT/enhancer binding protein (C/EBP), delta	8.22619	6.02104	6.59646	6.08162	6.69959	8.23154
Cer1	12622	Cerl|Cerl1|Cerr1|cer-1	cerberus 1 homolog (Xenopus laevis)	2.62628	2.784	3.66754	3.55806	3.25664	3.67459
Cflar	12633	2310024N18Rik|A430105C05Rik|CLARP|Cash|Casper|ENSMUSG00000072980|FLAME|FLAME-1|Flip|Gm9845|I-FLICE|MRIT|c-Flip	CASP8 and FADD-like apoptosis regulator	10.9802	11.537	11.5106	11.6045	11.1881	11.2601
Chek1	12649	C85740|Chk1|rad27	checkpoint kinase 1	6.30811	6.1861	6.4749	6.41604	6.18738	5.466
Chrd	12667	Chd	chordin	3.21124	4.06411	3.77446	4.72799	4.3441	3.67459
Chuk	12675	AI256658|Chuk1|Fbx24|Fbxo24|IKBKA|IKK1|Ikka|NFKBIKA	conserved helix-loop-helix ubiquitous kinase	10.0243	10.4835	10.3828	10.433	9.9041	10.1111
Elovl3	12686	CIN-2|Cig30	elongation of very long chain fatty acids (FEN1/Elo2, SUR4/Elo3, yeast)-like 3	3.04132	5.14657	4.49067	3.36542	5.21084	4.29608
Cish	12700	AI385595|CIS1|Cis|F17|F23	cytokine inducible SH2-containing protein	7.64123	6.96533	7.35081	7.27231	7.8491	7.55158
Socs3	12702	Cis3|Cish3|EF-10|Ef10|SSI-3|Ssi3	suppressor of cytokine signaling 3	9.9853	10.0628	10.0938	10.1184	9.82839	10.2362
Socs1	12703	Cish1|Cish7|JAB|SOCS-1|SSI-1	suppressor of cytokine signaling 1	5.28925	6.16647	5.9213	5.95038	6.01153	5.80704
Cxcr3	12766	Cd183|Cmkar3	chemokine (C-X-C motif) receptor 3	8.88052	9.05079	8.6001	9.57765	9.03143	9.31177
Ccr1	12768	Cmkbr1|Mip-1a-R	chemokine (C-C motif) receptor 1	8.17575	10.536	10.1814	10.4529	10.4064	9.08267
Ccr2	12772	Cc-ckr-2|Ccr2a|Ccr2b|Ckr2|Ckr2a|Ckr2b|Cmkbr2|mJe-r	chemokine (C-C motif) receptor 2	12.6396	13.7591	13.6236	13.8912	13.2638	13.1309
Ccr5	12774	AM4-7|CD195|Cmkbr5	chemokine (C-C motif) receptor 5	11.4443	13.5404	13.3664	13.645	12.9739	12.267
Ccr7	12775	CC-CKR-7|CCR-7|CD197|Cdw197|Cmkbr7|EBI1|Ebi1h	chemokine (C-C motif) receptor 7	8.30811	9.32979	9.46894	9.64287	9.13316	9.12136
Cntf	12803	AI429687	ciliary neurotrophic factor	6.21124	6.83463	6.53696	6.53534	6.16353	6.76857
Cpa3	12873	MC-CPA	carboxypeptidase A3, mast cell	12.3809	10.0641	10.6788	10.5721	12.2203	12.5247
Cr2	12902	C3DR|CD21|CD35|Cr-1|Cr-2|Cr1	complement receptor 2	2.04132	3.14657	3.55207	3.72799	3.064	4.14407
Crebbp	12914	AW558298|CBP|CBP/p300|KAT3A|p300/CBP	CREB binding protein	11.3285	11.1831	11.2749	11.0787	10.6692	11.2955
Crlf1	12931	CLF-1|CRLM3|NR6.1	cytokine receptor-like factor 1	7.14984	7.17632	7.45092	7.97591	7.67449	7.55158
Csf1	12977	C87615|Csfm|MCSF|op	colony stimulating factor 1 (macrophage)	9.36775	9.06411	8.91839	8.88449	9.14539	9.05363
Csf1r	12978	AI323359|CD115|CSF-1R|Csfmr|Fim-2|Fms|M-CSF-R|M-CSFR	colony stimulating factor 1 receptor	13.7956	14.4004	14.2841	14.3385	14.212	14.1297
Csf2	12981	Csfgm|GMCSF|Gm-CSf|MGI-IGM	colony stimulating factor 2 (granulocyte-macrophage)	4.8993	5.90739	5.82508	6.08162	6.61419	6.40041
Csf3	12985	Csfg|G-CSF|MGI-IG	colony stimulating factor 3 (granulocyte)	5.12878	5.1861	5.17656	5.87999	5.25664	5.22208
Csf3r	12986	Cd114|Csfgr|G-CSF-R|G-CSFR	colony stimulating factor 3 receptor (granulocyte)	8.7102	10.2827	10.0977	10.2163	9.74649	9.22208
Smc3	13006	Bamacan|Cspg6|HCAP|Mmip1|SMC-3|SmcD	structural maintenance of chromosomes 3	10.4623	10.3484	10.2845	10.3079	9.99304	10.2468
Ctbp2	13017	AA407280|D7Ertd45e|Gtrgeo6|Ribeye	C-terminal binding protein 2	9.74176	9.3098	9.41005	9.18742	9.19916	9.1909
Ctf1	13019	CT-1	cardiotrophin 1	5.71374	3.97665	4.61096	4.46495	5.064	5.43358
Ctsw	13041	lymphopain	cathepsin W	8.72782	9.52161	9.25482	9.95894	9.9041	9.66415
Cyp26a1	13082	Cyp26|P450RA|P450RAI|RAH	cytochrome P450, family 26, subfamily a, polypeptide 1	3.94821	4.22458	3.9671	4.80599	3.42657	3.14407
Cyp7a1	13122	-	cytochrome P450, family 7, subfamily a, polypeptide 1	3.21124	3.43608	3.55207	3.87999	3.8416	3.43358
Cyp8b1	13124	-	cytochrome P450, family 8, subfamily b, polypeptide 1	4.04132	3.97665	4.35942	4.14302	4.25664	4.22208
Dgka	13139	80kDa|AW146112|Dagk1	diacylglycerol kinase, alpha	9.30576	9.48444	9.44688	9.8178	9.39363	9.90193
Dcn	13179	DC|DSPG2|PG40|PGII|PGS2|SLRR1B	decorin	9.3451	7.24343	7.66059	6.82485	7.97774	9.15654
Gadd45a	13197	AA545191|Ddit1|GADD45	growth arrest and DNA-damage-inducible 45 alpha	7.29871	7.08517	7.09639	7.27231	7.038	7.52874
Dld	13382	-	dihydrolipoamide dehydrogenase	9.4207	9.29858	9.24323	9.28938	9.35467	9.21494
Dll3	13389	pu|pudgy	delta-like 3 (Drosophila)	2.84867	3.14657	3.87399	4.36542	3.42657	1.97415
Dnmt3a	13435	MmuIIIA	DNA methyltransferase 3A	9.18343	9.59136	9.61636	9.49764	9.52343	9.30731
Dvl1	13542	Dvl|mKIAA4029	dishevelled, dsh homolog 1 (Drosophila)	8.85189	8.64198	8.76152	8.4407	8.58307	8.91373
E2f1	13555	E2F-1|mKIAA4009	E2F transcription factor 1	7.59591	8.16647	8.00602	8.03379	7.97089	7.52104
E2f5	13559	AU024671|E2F-5	E2F transcription factor 5	8.84867	8.52739	8.40173	8.68218	8.54666	8.51331
Lefty1	13590	AI450052|Ebaf|Leftb|Stra3|Tgfb4|lefty|lefty-1	left right determination factor 1	5.56488	5.83463	4.66754	6.2585	5.81123	5.61801
S1pr1	13609	AI849002|Edg1|Lpb1|S1p|S1p1	sphingosine-1-phosphate receptor 1	8.46338	7.8032	8.08085	7.70781	7.81123	8.58517
Efna1	13636	AI325262|B61|Efl1|Epl1|Eplg1|Lerk1	ephrin A1	8.61497	6.84701	7.13703	6.60245	7.29007	8.72904
Egf	13645	AI790464	epidermal growth factor	4.68518	5.14657	5.52169	4.72799	4.8416	5.14407
Egfr	13649	9030024J15Rik|AI552599|Erbb|Errb1|Errp|Wa5|wa-2|wa2	epidermal growth factor receptor	9.00999	6.93084	7.29802	6.64552	7.18738	8.12897
Eomes	13813	C77258|TBR-2|Tbr2	eomesodermin homolog (Xenopus laevis)	6.69953	7.69089	7.49848	8.10495	7.8265	7.88704
Eya1	14048	bor	eyes absent 1 homolog (Drosophila)	5.25077	5.6205	5.42654	5.60245	5.25664	5.36647
Eya4	14051	B130023L16Rik	eyes absent 4 homolog (Drosophila)	3.84867	5.85929	5.72199	4.87999	5.25664	4.06161
Fabp1	14080	Fabpl|L-FABP	fatty acid binding protein 1, liver	3.84867	4.36897	4.05457	4.2585	4.50457	3.7815
Fadd	14082	Mort1/FADD	Fas (TNFRSF6)-associated via death domain	6.72782	7.05346	7.06514	7.18742	7.064	6.83213
Fas	14102	AI196731|APO1|APT1|CD95|TNFR6|Tnfrsf6|lpr	Fas (TNF receptor superfamily member 6)	6.83573	7.4685	7.43471	7.69761	7.25664	7.1836
Fasl	14103	APT1LG1|CD178|CD95-L|CD95L|Fas-L|Faslg|Tnfsf6|gld	Fas ligand (TNF superfamily, member 6)	6.74176	7.38604	6.77446	7.66658	7.52343	7.55158
Fbp2	14120	Fbp-1|Fbp1|Rae-30	fructose bisphosphatase 2	3.04132	2.56161	3.13703	3.72799	2.8416	3.29608
Ms4a2	14126	FcRB|Fce1b|Fcer1b|Fcrbeta|Ms4a1|fcERI	membrane-spanning 4-domains, subfamily A, member 2	7.38117	6.02104	6.09639	6.20192	7.32273	7.99096
Fcer1g	14127	AI573376|CD23|FcR-gamma|FcR[g]|FcRgamma|Fce1g|FcepsilonRI|Ly-50	Fc receptor, IgE, high affinity I, gamma polypeptide	11.9201	13.1438	12.8915	13.347	12.9012	12.3827
Fcer2a	14128	CD23|Fce2|Fcer2|Ly-42	Fc receptor, IgE, low affinity II, alpha polypeptide	3.50075	4.14657	3.77446	4.72799	4.64896	3.7815
Fcgr1	14129	AI323638|AV092959|CD64|FcgammaRI|IGGHAFC	Fc receptor, IgG, high affinity I	10.6319	12.9424	12.6488	13.196	12.7357	11.4908
Fcgr2b	14130	AI528646|CD32|F630109E10Rik|Fc[g]RII|FcgRII|Fcgr2|Fcgr2a|Fcr-2|Fcr-3|Ly-17|Ly-m20|LyM-1|Lym-1|fcRII	Fc receptor, IgG, low affinity IIb	12.1155	13.2577	13.3922	13.1286	13.1844	12.751
Fga	14161	ENSMUSG00000059807|Fib	fibrinogen alpha chain	3.36325	2.97665	2.55207	3.87999	3.42657	3.14407
Fgf10	14165	AEY17|BB213776|Fgf-10|Gsfaey17	fibroblast growth factor 10	4.79621	3.67709	2.55207	3.36542	3.8416	4.49771
Fgf15	14170	FGF19	fibroblast growth factor 15	2.62628	2.784	3.87399	3.87999	4.16353	2.97415
Fgf18	14172	D130055P09Rik|FGF-18	fibroblast growth factor 18	4.28925	3.14657	3.66754	3.14302	3.8416	4.06161
Fgf2	14173	Fgf-2|Fgfb|bFGF	fibroblast growth factor 2	3.84867	4.22458	4.05457	4.55806	4.3441	4.72904
Fos	14281	D12Rfj1|c-fos|cFos	FBJ osteosarcoma oncogene	14.6869	13.9367	13.974	13.7962	14.0858	14.6388
Fpr1	14293	FPR|LXA4R|fMLF-R	formyl peptide receptor 1	7.50075	7.94819	7.4828	8.30625	7.40639	7.28703
Fut4	14345	AI451562|CD15|FAL|FucT-IV|LeX|SSEA-1|Ssea1	fucosyltransferase 4	4.99552	5.43608	5.52169	6.11265	5.7802	5.58886
Fyn	14360	AI448320|AW552119	Fyn proto-oncogene	9.60356	10.8362	10.8024	11.0489	10.5786	10.4336
Fzd7	14369	Fz7	frizzled homolog 7 (Drosophila)	9.04975	7.41959	7.49848	7.4407	7.97774	7.93415
Gapdhs	14447	Gapd-s|Gapds	glyceraldehyde-3-phosphate dehydrogenase, spermatogenic	3.62628	3.56161	3.77446	4.14302	3.064	3.29608
Gata3	14462	Gata-3|jal	GATA binding protein 3	10.2175	7.69775	8.04392	7.58043	8.886	10.2688
Gata6	14465	AA410133|GATA-6	GATA binding protein 6	5.74176	4.14657	4.61096	3.55806	4.57857	5.75551
Gbp2b	14468	Gbp-1|Gbp1|Mag-1|Mpa-1|Mpa1	guanylate binding protein 2b	7.78279	8.3945	8.21977	9.10881	8.54666	8.38778
Gbp2	14469	-	guanylate binding protein 2	10.3789	11.475	11.4291	11.932	11.3573	10.913
Usp15	14479	4921514G19Rik|AI327321|E430033I05Rik|Gcap18	ubiquitin specific peptidase 15	9.76413	10.0601	10.0977	10.0639	9.77628	9.79433
B4galt1	14595	B-1,4-GalT|B-1,4-GalT1|GalT|Ggtb|Ggtb2|b4Gal-T1|beta-1,4-GalT|beta-1,4-GalT1|beta4Gal-T1	UDP-Gal:betaGlcNAc beta 1,4- galactosyltransferase, polypeptide 1	11.6748	12.2384	12.168	12.3742	12.0273	11.7955
Gh	14599	Gh1	growth hormone	4.28925	3.784	3.87399	3.36542	2.25664	3.67459
Ghr	14600	GHBP|GHR/BP	growth hormone receptor	7.67068	5.73154	5.94438	5.01749	6.32273	7.13402
Gls	14660	6330442B14|AI314027|B230365M23Rik	glutaminase	11.1667	11.4268	11.4069	11.3662	11.0704	11.3399
Glud1	14661	AI118167|Gdh-X|Glud|Gludl	glutamate dehydrogenase 1	11.8475	12.1063	12.0142	12.2843	11.9705	12.0449
Gnas	14683	5530400H20Rik|A930027G11Rik|C130027O20Rik|GPSA|GSP|Galphas|Gnas1|Gnasxl|Gs-alpha|Gsa|Nesp|Nesp55|Nespl|Oed-Sml|Oedsml|P1|P2|P3|PHP1A|PHP1B|POH|SCG6	GNAS (guanine nucleotide binding protein, alpha stimulating) complex locus	11.6422	11.2534	11.2121	11.297	11.4077	11.5011
Gng12	14701	2010305F15Rik|AA536815|AI115529|AI314170|AI842738	guanine nucleotide binding protein (G protein), gamma 12	10.6734	11.0454	10.9067	11.1088	10.9032	10.8126
Got2	14719	AL022787|FABP-pm|Got-2|mAspAT	glutamatic-oxaloacetic transaminase 2, mitochondrial	7.68518	7.19582	7.18627	7.45288	7.49505	7.15406
Lpar1	14745	AI326300|Edg2|Gpcr26|Kdt2|lpA1|vzg-1	lysophosphatidic acid receptor 1	6.76924	6.26205	6.77446	6.70781	6.27901	6.91666
Cmklr1	14747	ChemR23|DEZ|Gpcr27|mcmklr1	chemokine-like receptor 1	10.6169	11.3331	11.3621	11.3129	11.1162	10.9181
Grb10	14783	5730571D09Rik|AI325020|Meg1|mKIAA0207	growth factor receptor bound protein 10	7.30811	5.40291	5.58181	5.64552	5.42657	6.99652
Grb2	14784	AA408164|Ash	growth factor receptor bound protein 2	11.0685	11.8307	11.7153	11.914	11.5887	11.3883
Cxcl1	14825	Fsp|Gro1|KC|Mgsa|N51|Scyb1|gro	chemokine (C-X-C motif) ligand 1	10.9897	9.32538	9.83901	9.26542	9.7802	10.3459
Hspa5	14828	AL022860|AU019543|Bip|D2Wsu141e|D2Wsu17e|Grp78|Hsce70|SEZ-7|Sez7|baffled|mBiP	heat shock protein 5	13.458	13.4206	13.3375	13.5503	13.5271	13.3748
Gk	14933	D930012N15Rik|Gyk	glycerol kinase	8.7208	10.9618	10.5455	11.0559	10.5467	9.18604
Gzma	14938	AW494114|Ctla-3|Ctla3|Hf|SE1|TSP-1|TSP1	granzyme A	9.15506	8.86843	8.4749	9.79168	9.57857	9.65011
Gzmb	14939	AI553453|CCP-1/C11|CCP1|Ctla-1|Ctla1|GZB	granzyme B	6.74176	8.09039	7.64658	8.72799	8.05106	7.60351
Gzmc	14940	AI323531|CCP2|Ctla-5|Ctla5	granzyme C	5.99552	7.606	7.93289	8.20192	8.47096	7.24094
Gzmd	14941	CCP5|Ctla-5|Ctla5	granzyme D	3.74176	4.43608	4.05457	4.46495	3.57857	2.55911
Gzme	14942	CCP3|Ctla-6|Ctla6|MCSP-2	granzyme E	3.84867	3.784	3.9671	4.46495	4.16353	3.67459
Gzmf	14943	CCP4|Ctla-7|Ctla7|MCSP-3	granzyme F	2.62628	2.56161	3.55207	3.72799	1.8416	2.97415
Gzmg	14944	Ctla-7|Ctla7	granzyme G	3.50075	3.784	4.72199	4.2585	3.57857	3.55911
Gzmk	14945	-	granzyme K	4.36325	4.36897	4.35942	3.55806	4.16353	4.14407
H2-Aa	14960	Aalpha|H-2Aa|H2Aa|I-Aalpha|IAalpha|Ia-1|Ia1	histocompatibility 2, class II antigen A, alpha	17.2665	17.3409	17.2543	17.6536	17.6937	17.5792
H2-Ab1	14961	AI845868|Abeta|H-2Ab|H2-Ab|I-Abeta|IAb|Ia-2|Ia2|Rmcs1	histocompatibility 2, class II antigen A, beta 1	15.9564	16.0569	15.9952	16.4925	16.5018	16.3211
H2-D1	14964	H-2D|H2-D	histocompatibility 2, D region locus 1	15.2524	15.7953	15.7214	15.9661	15.82	15.6172
H2-Eb1	14969	Eb|H-2Eb|H2Eb|Ia-4|Ia4	histocompatibility 2, class II antigen E beta	7.21124	8.15157	8.27544	8.31961	7.87135	7.90489
H2-K1	14972	H-2K|H-2K(d)|H2-K|K-f	histocompatibility 2, K1, K region	15.2071	15.6077	15.5128	15.8108	15.7247	15.483
H2-M3	14991	H-2M3|Hmt|M3a|MuprM3|MuprM301|MuprM302|R4B2	histocompatibility 2, M region locus 3	9.97648	10.7299	10.5043	10.6848	10.5604	10.3782
H2-DMa	14998	H-2Ma|H2-Ma	histocompatibility 2, class II, locus DMa	12.9236	13.1881	13.3075	13.5446	13.5137	13.4012
H2-DMb1	14999	AI385589|H-2Mb1|H2-Mb1	histocompatibility 2, class II, locus Mb1	12.677	13.2134	13.2134	13.5124	13.3273	13.1789
H2-DMb2	15000	H-2Mb2|H2-Mb2	histocompatibility 2, class II, locus Mb2	9.36325	9.56723	10.1619	10.0972	10.1378	10.3825
H2-Ob	15002	A-beta-2|A-beta2|H-2Ab|H-2I|H-2Ob|H2-Ab|H2-Ab2|H2-IAb2|Ob	histocompatibility 2, O region beta locus	9.31744	9.26897	9.35512	9.52673	9.29556	9.43563
H2-Pa	15003	H2-Pa-ps	histocompatibility 2, P region alpha locus	4.68518	5.50021	5.45896	5.51226	4.9005	5.43358
H2-Q1	15006	H-2Q1|Q1|Q1b|Q1d|Q1k|Qa-1|Qa1|Qed-1	histocompatibility 2, Q region locus 1	6.14984	6.26205	6.13703	7.01749	6.69959	6.74233
H2-Q10	15007	H-2Q10|Q10|Qa10	histocompatibility 2, Q region locus 10	3.21124	3.67709	4.28903	4.36542	4.064	3.97415
H2-Q2	15013	BE136769|ENSMUSG00000079507|Gm11132|H-2Q2|gs14-2	histocompatibility 2, Q region locus 2	6.19107	4.06411	4.87399	4.72799	4.95708	6.38354
H2-T23	15040	37b|37c|H-2T23|H2-Qa1|Qa-1|Qa-1(b)|Qa1|Qed-1|T18c|T18c(37)|T23b|T23d	histocompatibility 2, T region locus 23	9.93006	10.2884	10.1887	10.4932	10.6142	10.1982
Ptpn6	15170	70Z-SHP|Hcph|PTPTY-42|Ptp1C|SH-PTP1|SHP-1|hcp|me	protein tyrosine phosphatase, non-receptor type 6	10.412	11.696	11.4813	11.851	11.3814	10.887
Hdc	15186	AW108189|Hdc-a|Hdc-c|Hdc-e|Hdc-s	histidine decarboxylase	7.16026	6.28043	7.17656	6.14302	7.44647	7.52104
Hey1	15213	AI316788|AI414254|CHF2|HRT1|Herp2|Hesr1|bHLHb31|hesr-1	hairy/enhancer-of-split related with YRPW motif 1	8.75556	6.35169	6.42654	5.20192	8.07682	9.83988
Hey2	15214	CHF1|Herp1|Hrt2|bHLHb32|hesr2	hairy/enhancer-of-split related with YRPW motif 2	5.53317	4.36897	4.35942	4.55806	5.3441	5.80704
Hgf	15234	C230052L06Rik|HGF/SF|NK1|NK2|SF|SF/HGF	hepatocyte growth factor	8.29398	9.46046	9.25019	9.20911	8.7958	8.60715
Hipk1	15257	1110062K04Rik|Myak	homeodomain interacting protein kinase 1	10.6319	10.7274	10.7575	10.6861	10.4077	10.7879
Hmgb1	15289	HMG-1|Hmg1|SBP-1|p30	high mobility group box 1	11.9505	11.6745	11.7753	11.816	11.6344	11.5544
Nr4a1	15370	GFRP1|Gfrp|Hbr-1|Hbr1|Hmr|N10|NGFI-B|NGFIB|NP10|TIS1|TR3|nur77	nuclear receptor subfamily 4, group A, member 1	11.821	11.0871	11.3621	10.8584	11.2997	11.3819
Hras	15461	H-ras|Ha-ras|Harvey-ras|Hras-1|Hras1|Kras2|c-H-ras|c-Ha-ras|c-rasHa|ras	Harvey rat sarcoma virus oncogene	10.1261	9.48444	9.49848	9.75282	9.85469	9.6624
Hsd11b1	15483	-	hydroxysteroid 11-beta dehydrogenase 1	7.07474	7.56161	7.53696	8.4407	8.04454	8.25027
Icam1	15894	CD54|Icam-1|Ly-47|MALA-2	intercellular adhesion molecule 1	9.61117	9.55973	9.57997	9.81309	9.98626	9.51911
Irf8	15900	AI893568|ICSBP|IRF-8|Icsbp1|Myls	interferon regulatory factor 8	10.3011	11.0917	10.9228	11.465	11.0445	10.7046
Id2	15902	AI255428|C78922|Idb2|bHLHb26	inhibitor of DNA binding 2	12.01	12.3974	12.2118	12.6048	12.4609	12.2716
Ido1	15930	Ido|Indo	indoleamine 2,3-dioxygenase 1	4.68518	5.02104	4.77446	4.80599	5.064	6.67459
Ifit1	15957	ISG56|Ifi56|P56	interferon-induced protein with tetratricopeptide repeats 1	7.1706	9.35386	9.41005	9.38143	9.7485	8.25027
Ifna1	15962	Ifa1	interferon alpha 1	1.62628	3.784	3.42653	4.01749	2.8416	3.14407
Ifng	15978	IFN-g|Ifg	interferon gamma	7.61117	8.74483	8.09639	9.48584	9.04128	8.85985
Cd79b	15985	B29|Ig-beta|Igb|Igbeta	CD79B antigen	7.96613	8.44017	7.83129	8.63488	8.33346	8.47001
Ighm	16019	AI326478|Igh-6|Igh-M|Igh6|Igm|muH	immunoglobulin heavy constant mu	12.2053	12.1742	11.8668	12.3308	11.9846	12.338
Igkc	16071	Igk-C	immunoglobulin kappa constant	13.1361	11.4695	12.1563	12.5217	12.4679	14.2822
Il10	16153	CSIF|Il-10	interleukin 10	8.37671	8.81585	8.39756	9.42534	8.49026	8.31845
Il10ra	16154	AW553859|CDw210|CDw210a|Il10r|mIL-10R	interleukin 10 receptor, alpha	10.8718	12.0336	11.8792	12.0088	11.5976	11.2567
Il10rb	16155	6620401D04Rik|AI528744|CRF2-4|Crfb4|D16H21S58|D21S58h|IL-10R2|Il10r2	interleukin 10 receptor, beta	11.1898	11.7378	11.5313	11.7639	11.5819	11.4635
Il11	16156	IL-11	interleukin 11	3.50075	3.14657	2.9671	3.87999	2.8416	3.43358
Il12a	16159	IL-12p35|Il-12a|Ll12a|p35	interleukin 12a	3.94821	3.43608	4.42654	4.2585	4.50457	4.14407
Il12b	16160	Il-12b|Il-12p40|Il12p40|p40	interleukin 12b	7.65603	8.97946	8.77446	8.80599	7.69959	8.02943
Il12rb1	16161	CD212|IL-12R[b]	interleukin 12 receptor, beta 1	6.79621	7.64198	7.62531	8.27916	7.8416	7.44988
Il13	16163	Il-13	interleukin 13	4.28925	4.6205	4.77446	5.36542	6.21084	5.49771
Il13ra1	16164	AI882074|CD213a1|IL-13R-alpha-1|IL-13r[a]|Il13ra|NR4	interleukin 13 receptor, alpha 1	10.4422	10.4645	10.2525	10.5439	10.3441	10.6884
Il15	16168	AI503618|IL-15	interleukin 15	7.82922	8.25277	8.09122	8.11265	8.19328	8.01854
Il16	16170	mKIAA4048	interleukin 16	9.52312	9.41752	9.07563	9.5296	9.65539	9.81964
Il17a	16171	Ctla-8|Ctla8|IL-17|IL-17A|Il17	interleukin 17A	4.84867	4.56161	3.42653	4.36542	4.25664	3.55911
Il18	16173	Igif|Il-18	interleukin 18	8.4884	8.88053	8.76152	9.27916	8.78802	8.474
Il1a	16175	Il-1a	interleukin 1 alpha	6.78279	5.73154	6.05457	5.91561	6.54204	6.06161
Il1b	16176	IL-1beta|Il-1b	interleukin 1 beta	11.4534	12.907	12.8222	12.6564	12.5926	11.7152
Il1r1	16177	CD121a|CD121b|IL-1R1|IL-iR|Il1r-1	interleukin 1 receptor, type I	7.84222	7.37753	7.72865	7.28598	7.18738	8.392
Il1r2	16178	CD121b|Il1r-2	interleukin 1 receptor, type II	6.61117	6.91916	6.90962	6.68734	6.38593	6.67459
Il1rn	16181	F630041P17Rik|IL-1ra	interleukin 1 receptor antagonist	9.64865	10.8032	11.1207	11.0165	11.1552	10.4129
Il2	16183	Il-2	interleukin 2	4.28925	4.88354	4.28903	5.55806	5.54204	4.67459
Il2ra	16184	CD25|Il2r|Ly-43	interleukin 2 receptor, alpha chain	7.78279	10.4493	10.0142	10.6295	9.95881	9.47599
Il3	16187	BPA|Csfmu|HCGF|Il-3|MCGF|PSF	interleukin 3	2.36325	4.06411	3.55207	3.87999	3.42657	3.67459
Il4	16189	BSF-1|Il-4	interleukin 4	4.04132	2.56161	2.77446	3.55806	3.8416	4.14407
Il5	16191	Il-5	interleukin 5	4.43364	4.29858	4.28903	4.64552	4.95708	4.72904
Il6	16193	Il-6	interleukin 6	6.1706	5.83463	6.17656	5.91561	6.16353	6.58886
Il6ra	16194	CD126|IL-6R|IL-6R-alpha|IL-6RA|Il6r	interleukin 6 receptor, alpha	11.291	11.5144	11.4665	11.3925	11.1903	11.5558
Il6st	16195	5133400A03Rik|AA389424|BB405851|CD130|D13Ertd699e|gp130	interleukin 6 signal transducer	9.16026	8.33859	8.63599	7.99269	8.49026	9.3273
Il7	16196	A630026I06Rik|Il-7|hlb368	interleukin 7	5.59591	4.36897	4.55207	3.87999	5.4661	4.97415
Il7r	16197	CD127|IL-7Ralpha	interleukin 7 receptor	7.67068	8.68055	8.84055	8.73299	8.8227	8.74894
Il9	16198	Il-9|P40	interleukin 9	3.50075	1.56161	2.77446	4.2585	2.8416	2.55911
Il9r	16199	-	interleukin 9 receptor	4.8993	4.14657	4.28903	4.95038	4.71607	4.97415
Inpp5d	16331	SHIP|SHIP-1|SHIP1|SIP-145|p150Ship|s-SHIP	inositol polyphosphate-5-phosphatase D	9.84545	11.0018	10.943	10.9515	10.6065	10.1824
Inppl1	16332	51C|SHIP2	inositol polyphosphate phosphatase-like 1	10.2881	10.6042	10.5633	10.6255	10.3468	10.4928
Ins1	16333	Ins-1|Ins2-rs1	insulin I	1.04132	3.43608	3.9671	3.36542	3.71607	3.29608
Irf2	16363	9830146E22Rik|AI646973|Irf-2	interferon regulatory factor 2	10.914	11.5881	11.636	11.6751	11.3898	11.2916
Irf4	16364	AI385587|IRF-4|LSIRF|Spip	interferon regulatory factor 4	7.54116	7.1162	7.27999	7.65609	7.80354	7.95714
Irs1	16367	G972R|IRS-1	insulin receptor substrate 1	6.43364	4.50021	4.77446	4.01749	4.50457	6.24094
Itch	16396	6720481N21Rik|8030492O04Rik|A130065M08|AIP4|C230047C07Rik	itchy, E3 ubiquitin protein ligase	11.1188	11.0891	11.0599	11.1929	10.7575	11.0576
Itga6	16403	5033401O05Rik|AI115430|Cd49f|VLA-6	integrin alpha 6	11.447	10.9837	10.5596	10.3988	10.4637	10.461
Itgae	16407	A530055J10|CD103|aM290|alpha-E1|alpha-M290	integrin alpha E, epithelial-associated	8.64865	9.32316	9.03319	9.47394	9.41903	9.37929
Itgal	16408	(p180)|Cd11a|LFA-1|LFA-1A|Ly-15|Ly-21	integrin alpha L	9.82922	10.9367	10.7361	11.3221	10.7283	10.5935
Itgav	16410	1110004F14Rik|2610028E01Rik|CD51|D430040G12Rik	integrin alpha V	9.90085	10.3924	10.3722	10.1746	10.0494	9.88104
Itgax	16411	AI449405|Cd11c|Cr4|N418	integrin alpha X	8.68878	9.17877	9.59464	9.2585	9.9005	9.24094
Itgb3	16416	CD61|GP3A|INGRB3	integrin beta 3	7.38117	7.3342	7.44284	7.11265	7.37558	7.76205
Itpr1	16438	D6Pas2|ENSMUSG00000072853|Gm10429|IP3R1|InsP3R|Ip3r|Itpr-1|P400|Pcp-1|Pcp1|opt|wblo	inositol 1,4,5-trisphosphate receptor 1	9.36325	9.606	9.72366	9.39095	8.72832	9.35353
Itpr2	16439	AI649341|InsP3R-2|InsP3R-5|Ip3r2|Itpr5|insP3R2	inositol 1,4,5-triphosphate receptor 2	9.01573	9.50608	9.4887	9.19831	8.62733	9.41709
Jag1	16449	ABE2|Gsfabe2|Htu|Ozz|Ser-1	jagged 1	8.28449	9.03464	8.9271	8.5296	8.56952	8.70547
Jak1	16451	AA960307|BAP004|C130039L05Rik	Janus kinase 1	10.3967	10.7498	10.6984	10.8527	10.5909	10.7588
Jak2	16452	Fd17	Janus kinase 2	10.7836	11.2499	11.3513	11.3304	10.8996	10.9833
Jak3	16453	fae|wil	Janus kinase 3	8.28449	9.80002	9.73529	9.63488	9.26787	9.04293
Jarid2	16468	Jmj|jumonji	jumonji, AT rich interactive domain 2	9.58435	10.1111	10.1408	10.1088	9.49026	9.59254
Jun	16476	AP-1|Junc|c-jun	jun proto-oncogene	12.451	10.9724	11.2268	11.0738	11.4998	12.3025
Junb	16477	-	jun B proto-oncogene	14.3551	14.0998	14.145	14.0631	14.2259	14.4782
Jund	16478	Jund1	jun D proto-oncogene	10.8829	10.1528	10.4265	10.2671	10.6468	11.022
Kcnk2	16526	A430027H14Rik|AI848635|TREK-1	potassium channel, subfamily K, member 2	4.21124	3.43608	-0.0328966	3.36542	2.25664	3.43358
Klf2	16598	Lklf	Kruppel-like factor 2 (lung)	10.294	10.3031	10.6882	10.5983	10.666	10.6333
Klrc1	16641	CD159a|NKG2A|NKG2B	killer cell lectin-like receptor subfamily C, member 1	8.83574	9.53889	9.09381	10.0599	9.49026	9.58148
Klrd1	16643	CD94	killer cell lectin-like receptor, subfamily D, member 1	9.82268	10.5168	10.0925	10.977	10.3872	10.6624
Kras	16653	AI929937|K-ras|Ki-ras|Kras-2|Kras2|p21B|ras	v-Ki-ras2 Kirsten rat sarcoma viral oncogene homolog	9.9809	10.3582	10.4132	10.4829	9.85097	9.95857
Lag3	16768	CD223|LAG-3|Ly66	lymphocyte-activation gene 3	6.94821	8.18122	7.83747	8.50643	8.08319	7.97415
Lamp1	16783	AI196048|CD107a|Lamp-1	lysosomal-associated membrane protein 1	12.3837	12.8233	12.7119	12.8839	12.8364	12.6538
Lck	16818	Hck-3|Lsk|Lskt|p56<lck>|p56Lck	lymphocyte protein tyrosine kinase	8.87104	9.97946	9.56887	10.6666	10.1301	9.95999
Lcp2	16822	AI323664|BB161688|SLP-76|SLP76|twm	lymphocyte cytosolic protein 2	10.4915	11.8497	11.5901	11.9932	11.3099	11.1143
Ldha	16828	Ldh1|Ldhm|l7R2	lactate dehydrogenase A	11.3967	12.1159	12.0893	12.4261	12.1119	11.5971
Lef1	16842	3000002B05|AI451430|Lef-1	lymphoid enhancer binding factor 1	5.92396	6.29858	6.62531	7.11265	6.69959	6.52874
Lepr	16847	LEPROT|Leprb|Modb1|OB-RGRP|Obr|db|diabetes|obese-like|obl	leptin receptor	6.78279	5.36897	6.17656	5.60245	5.9005	7.1836
Lgals9	16859	AA407335|AI194909|AI265545|LGALS35|Lgals5|gal-9|galectin-9	lectin, galactose binding, soluble 9	10.4131	11.5124	11.4075	11.4947	11.6944	10.7332
Lif	16878	-	leukemia inhibitory factor	6.59591	6.36897	6.21503	6.4888	6.3441	6.44988
Lifr	16880	A230075M04Rik|AW061234|LIF	leukemia inhibitory factor receptor	10.7365	10.6124	10.4689	10.3046	9.87686	11.1885
Gzmm	16904	Lmet1|MMET-1	granzyme M (lymphocyte met-ase 1)	3.62628	2.784	3.66754	3.55806	3.25664	4.22208
Psmb9	16912	Lmp-2|Lmp2	proteasome (prosome, macropain) subunit, beta type 9 (large multifunctional peptidase 2)	11.0028	11.465	11.527	11.8879	11.6076	11.2791
Lpl	16956	-	lipoprotein lipase	10.2833	9.53124	10.1445	9.5439	10.4746	10.6858
Xcl1	16963	AI661682|ATAC|LTN|Lptn|SCM-1|SCM-1a|Scyc1	chemokine (C motif) ligand 1	8.67431	9.22931	8.73529	10.1965	9.82839	9.37289
Lrp6	16974	C030016K15Rik|Cd|Gw|ska26|ska<m26Jus>|skax26	low density lipoprotein receptor-related protein 6	10.3209	9.55029	9.74518	9.35248	9.39875	10.2676
Klrb1a	17057	Ly55a|NKR-P1.7|NKR-P1A|NKRP12|Nkrp1-a|Nkrp1a|ly-55A	killer cell lectin-like receptor subfamily B member 1A	6.72782	6.53124	6.58181	6.55806	7.45631	7.48194
Cd180	17079	F630107B15|Ly78|RP105	CD180 antigen	9.72431	11.4315	11.2327	11.5567	10.988	10.3782
Il1rl1	17082	DER4|Fit-1|Ly84|ST2L|St2|St2-rs1|T1|T1/ST2	interleukin 1 receptor-like 1	8.36775	7.84701	8.38073	7.92438	8.59203	8.93125
Ncr1	17086	Ly94|NKp46	natural cytotoxicity triggering receptor 1	9.79621	9.89849	9.64306	10.6731	10.2382	10.575
Lyn	17096	AA407514|Hck-2|p53Lyn|p56Lyn	Yamaguchi sarcoma viral (v-yes-1) oncogene homolog	10.9186	11.9717	11.7587	11.9712	11.4685	11.0957
Smad2	17126	7120426M23Rik|Madh2|Madr2|Smad-2|mMad2	SMAD family member 2	8.73829	8.82527	8.68478	8.66658	8.61859	8.75223
Smad3	17127	AU022421|Madh3	SMAD family member 3	7.36325	7.30756	7.22449	7.69761	7.07682	7.35785
Smad4	17128	AW743858|D18Wsu70e|DPC4|Madh4	SMAD family member 4	9.30576	9.24577	9.27544	9.31961	9.13316	9.38989
Nprl3	17168	Aag|CGTHBA|HS-26|HS-40|Mare|Phg|Prox1|m(alpha)RE	nitrogen permease regulator-like 3	7.10741	7.14657	7.21503	7.14302	6.886	6.79433
Mbd3	17192	AI181826|AU019209	methyl-CpG binding domain protein 3	10.1141	10.0156	10.0237	10.0297	10.0248	9.81807
Mcl1	17210	AW556805|Mcl-1	myeloid cell leukemia sequence 1	12.8054	13.0704	13.0357	13.1076	13.0176	12.963
Mcm5	17218	AA617332|AI324988|AL033333|Cdc46|Mcmd5|P1-CDC46	minichromosome maintenance deficient 5, cell division cycle 46 (S. cerevisiae)	9.13143	9.40501	9.46894	9.46795	9.12083	8.22208
Mcm7	17220	AI747533|Mcmd7|mCDC47	minichromosome maintenance deficient 7 (S. cerevisiae)	9.58435	9.31204	9.35297	9.56929	9.10839	8.49379
Tpsb2	17229	AV011504|MMCP-6|Mcp-6|Mcp6|Mcpt6	tryptase beta 2	10.4022	8.28499	8.9501	8.87547	10.5819	10.9283
Mif	17319	GIF|Glif	macrophage migration inhibitory factor	10.3417	10.6286	10.4936	10.9632	10.7212	9.99513
Cxcl9	17329	BB139920|CMK|Mig|MuMIG|Scyb9|crg-10	chemokine (C-X-C motif) ligand 9	11.7071	13.2688	12.8964	13.5265	12.8732	12.1885
Pias2	17344	6330408K17Rik|AI462206|ARIP3|AU018068|Dib|Miz1|PIASxalpha|PIASxb|PIASxbeta|SIZ2	protein inhibitor of activated STAT 2	7.29871	6.43608	6.58181	6.23049	6.59649	7.05097
Mmp14	17387	AI325305|MT-MMP-1|MT1-MMP|sabe	matrix metallopeptidase 14 (membrane-inserted)	10.5201	11.7202	11.5474	11.6835	11.2686	10.9034
Mmp3	17392	EMS-2|MMP-3|SL-1|SLN-1|SLN1|STR-1|Stmy1|Str1	matrix metallopeptidase 3	4.8993	4.83463	4.77446	5.14302	4.16353	4.22208
Mmp9	17395	AW743869|B/MMP9|Clg4b|MMP-9|pro-MMP-9	matrix metallopeptidase 9	8.10741	5.93084	6.19592	6.08162	7.36517	7.34047
Grap2	17444	GRAP-2|GRB2L|GRBLG|GRID|Gads|GrbX|Grf40|GrpL|Mona|P38	GRB2-related adaptor protein 2	7.18087	8.3165	8.24787	8.39726	8.16953	7.86289
Mras	17532	2900078C09Rik|AI326250	muscle and microspikes RAS	8.47595	8.13652	8.27999	7.79646	8.12701	8.94569
Mx1	17857	AI893580|Mx|Mx-1	MX dynamin-like GTPase 1	7.03	9.74483	9.9501	9.29953	9.48786	8.17872
Mx2	17858	AI528743|Mx-2	MX dynamin-like GTPase 2	6.41636	8.68055	8.81259	8.18742	8.53277	7.1137
Ncf4	17972	AI451400|p40phox	neutrophil cytosolic factor 4	11.3616	12.797	12.7542	12.9635	12.4281	11.8583
Nfatc1	18018	2210017P03Rik|AI449492|AV076380|NF-ATc|NFAT2|NFATc|Nfatcb	nuclear factor of activated T cells, cytoplasmic, calcineurin dependent 1	8.58435	9.29406	9.27544	9.28938	8.93612	8.8102
Nfatc2	18019	AI607462|NF-ATc2|NF-ATp|NFAT1|NFAT1-D|Nfatp	nuclear factor of activated T cells, cytoplasmic, calcineurin dependent 2	9.28925	10.0046	10.0412	9.91561	9.52577	9.65714
Nfatc3	18021	C80703|D8Ertd281e|NFAT4|NFATx	nuclear factor of activated T cells, cytoplasmic, calcineurin dependent 3	8.87104	9.10335	9.04659	9.21627	8.95708	8.95429
Nfe2l2	18024	Nrf2	nuclear factor, erythroid derived 2, like 2	10.9991	11.8854	11.8134	11.8336	11.6382	11.2642
Nfil3	18030	AV225605|E4BP4	nuclear factor, interleukin 3, regulated	9.34738	10.5129	10.7623	10.5777	10.1316	9.94569
Nfkb1	18033	NF-KB1|NF-kappaB|NF-kappaB1|p105|p50|p50/p105	nuclear factor of kappa light polypeptide gene enhancer in B cells 1, p105	10.7487	11.2025	11.1959	11.1965	10.9405	10.9283
Nfkb2	18034	NF-kappaB2|lyt|p49|p49/p100|p50B|p52	nuclear factor of kappa light polypeptide gene enhancer in B cells 2, p49/p100	10.9542	10.9696	11.0808	10.9727	10.7782	10.6987
Nfkbia	18035	AI462015|Nfkbi	nuclear factor of kappa light polypeptide gene enhancer in B cells inhibitor, alpha	12.2401	11.3402	11.5284	11.4777	11.7689	11.8239
Nfkbib	18036	I(Kappa)B(beta)|I-kappa-B-beta|IKB-beta|IKappaBbeta|IkB|IkBb|NF-kappa-BIB|ikB-B	nuclear factor of kappa light polypeptide gene enhancer in B cells inhibitor, beta	7.91168	8.29406	8.38073	8.43458	7.91485	8.07744
Nfkbie	18037	I-kappa-B-epsilon|IKBE|IkB-E|NF-kappa-BIE|ikB-epsilon	nuclear factor of kappa light polypeptide gene enhancer in B cells inhibitor, epsilon	9.66154	9.82371	9.90815	10.0031	9.88418	9.52297
Nos2	18126	MAC-NOS|NOS-II|Nos-2|Nos2a|i-NOS|iNOS	nitric oxide synthase 2, inducible	6.68518	8.33859	8.47093	8.73797	7.90769	7.474
Notch2	18129	AI853703|N2	notch 2	10.558	10.571	10.7178	10.6322	10.2524	10.7563
Uhrf1	18140	AL022808|ICBP90|Np95|RNF106	ubiquitin-like, containing PHD and RING finger domains, 1	9.00999	9.01557	9.07301	9.23754	8.67871	7.83834
Pnoc	18155	N/OFQ|Npnc1|OFQ/N	prepronociceptin	3.50075	4.14657	4.28903	4.87999	3.95708	5.14407
Nras	18176	AV095280|N-ras	neuroblastoma ras oncogene	10.2963	10.4933	10.4808	10.723	10.3321	10.2468
Nrl	18185	D14H14S46E	neural retina leucine zipper gene	3.62628	2.784	3.77446	3.14302	3.25664	3.67459
Ntf3	18205	AI316846|AI835689|Nt3|Ntf-3	neurotrophin 3	4.56488	3.56161	3.77446	3.14302	3.42657	4.7815
Oat	18242	AI194874	ornithine aminotransferase	10.904	10.8639	10.8452	10.9685	10.9405	11.1124
Orc2	18393	AU041563|Orc2l	origin recognition complex, subunit 2	8.06923	8.58398	8.32905	8.40355	8.13316	8.17872
Osm	18413	OncoM	oncostatin M	9.06091	10.6892	10.7704	10.3079	10.1162	9.56286
Osmr	18414	OSMRB	oncostatin M receptor	8.47595	6.82214	7.31583	6.14302	6.63168	8.74894
Pbx1	18514	2310056B04Rik|D230003C07Rik|Pbx-1	pre B cell leukemia homeobox 1	8.89307	6.53124	7.27088	6.17277	6.92907	7.67459
Pbx3	18516	-	pre B cell leukemia homeobox 3	8.33134	8.4685	8.38917	8.42225	8.11462	8.29156
Pck1	18534	AI265463|PEPCK|Pck-1	phosphoenolpyruvate carboxykinase 1, cytosolic	3.74176	3.29858	2.9671	3.55806	4.3441	4.43358
Pctp	18559	PC-TP|StarD2	phosphatidylcholine transfer protein	6.21124	6.80954	6.62531	6.86184	6.52343	6.3317
Pdcd1	18566	Ly101|PD-1|Pdc1	programmed cell death 1	6.45071	7.83463	7.63244	8.10495	8.21084	7.58886
Pdgfra	18595	AI115593|CD140a|Pdgfr-2	platelet derived growth factor receptor, alpha polypeptide	6.99552	6.56161	6.83747	6.23049	5.54204	6.58886
Pdgfrb	18596	AI528809|CD140b|PDGFR-1|Pdgfr	platelet derived growth factor receptor, beta polypeptide	6.38117	6.50021	6.82508	6.04991	6.23392	6.6884
Pecam1	18613	C85791|Cd31|PECAM-1|Pecam	platelet/endothelial cell adhesion molecule 1	10.2904	9.9323	10.369	9.82485	9.82839	10.9159
Prf1	18646	Pfn|Pfp|Prf-1	perforin 1 (pore forming protein)	7.70666	8.0588	7.7153	8.54105	8.31192	8.31845
Pik3ca	18706	6330412C24Rik|caPI3K|p110|p110alpha	phosphatidylinositol 3-kinase, catalytic, alpha polypeptide	10.4369	10.4645	10.4163	10.1355	10.0752	10.5016
Pik3cd	18707	2410099E07Rik|2610208K16Rik|AW545373|p110delta	phosphatidylinositol 3-kinase catalytic delta polypeptide	9.84545	10.8539	10.874	10.8709	10.5034	10.4346
Pik3r1	18708	PI3K|p50alpha|p55alpha|p85alpha	phosphatidylinositol 3-kinase, regulatory subunit, polypeptide 1 (p85 alpha)	11.3022	10.3506	10.4669	10.3146	10.4378	11.146
Pik3r2	18709	p85beta	phosphatidylinositol 3-kinase, regulatory subunit, polypeptide 2 (p85 beta)	7.11813	7.16647	6.9213	6.76751	6.98456	7.08267
Pik3r3	18710	AA414954|p55pik	phosphatidylinositol 3 kinase, regulatory subunit, polypeptide 3 (p55)	7.41636	6.20547	6.13703	5.80599	6.3441	7.1239
Pira1	18722	6M21|Ly89|PIR-A1|Pir|Gm15922	paired-Ig-like receptor A1	11.555	12.3245	12.1953	12.4638	11.7048	11.7682
Lilra6	18726	7M1|Pira3	leukocyte immunoglobulin-like receptor, subfamily A (with TM domain), member 6	6.14984	6.14657	6.42654	6.66658	6.064	6.25955
Pirb	18733	Gp91|LIR-3|Lilrb3|PIR-B	paired Ig-like receptor B	10.5521	11.4092	11.1953	11.3411	10.8179	10.8522
Pitx2	18741	9430085M16Rik|Brx1|Brx1b|Munc30|Otlx2|Ptx2|Rieg	paired-like homeodomain transcription factor 2	3.94821	4.36897	3.55207	3.72799	3.71607	3.14407
Prkcb	18751	A130082F03Rik|PKC-Beta|Pkcb|Prkcb1|Prkcb2	protein kinase C, beta	9.36325	10.0238	9.98252	9.94608	9.61419	9.69525
Prkcz	18762	AI098070|C80388|Pkcz|R74924|aPKCzeta|nPKC-zeta|zetaPKC	protein kinase C, zeta	5.87421	3.88354	4.35942	4.36542	4.64896	5.52874
Plcg1	18803	AI894140|Cded|Plc-1|Plc-gamma1|Plcg-1	phospholipase C, gamma 1	8.22123	8.21505	8.33779	8.2234	8.17551	8.35785
Pml	18854	1200009E24Rik|AI661194|Trim19	promyelocytic leukemia	9.8567	10.433	10.591	10.5693	10.4637	10.0603
Pparg	19016	Nr1c3|PPAR-gamma|PPAR-gamma2|PPARgamma|PPARgamma2	peroxisome proliferator activated receptor gamma	7.3542	7.13652	6.73529	6.4407	6.7485	7.66065
Ppargc1a	19017	A830037N07Rik|ENSMUSG00000079510|Gm11133|PGC-1|PGC-1v|Pgc-1alpha|Pgc1|Pgco1|Ppargc1	peroxisome proliferative activated receptor, gamma, coactivator 1 alpha	4.36325	4.73154	4.55207	4.80599	4.9005	4.49771
Ppm1a	19042	2310003C21Rik|2900017D14Rik|AI427932|AU017636|MMPa-2|MPPa-1	protein phosphatase 1A, magnesium dependent, alpha isoform	10.4592	10.2006	10.1705	10.1654	10.1255	10.3306
Ppp1cb	19046	1200010B19	protein phosphatase 1, catalytic subunit, beta isoform	12.4087	11.3303	11.3871	11.5181	11.6065	11.8468
Ppp2ca	19052	PP2A|R75353	protein phosphatase 2 (formerly 2A), catalytic subunit, alpha isoform	11.7504	11.7109	11.677	11.8254	11.666	11.6333
Ppp2cb	19053	AI115466|D8Ertd766e|PP2Ac	protein phosphatase 2 (formerly 2A), catalytic subunit, beta isoform	10.3666	9.90294	9.93865	9.96107	10.1162	10.1982
Ppp3ca	19055	2900074D19Rik|CN|Caln|Calna|CnA	protein phosphatase 3, catalytic subunit, alpha isoform	10.512	10.6814	10.6606	10.5137	10.2804	10.643
Ppp3cc	19057	Calnc|PP2BA gamma	protein phosphatase 3, catalytic subunit, gamma isoform	8.98676	9.32094	9.18869	9.57765	9.33346	9.43563
Ppp3r1	19058	CaNB1|Cnb1|MCIP1	protein phosphatase 3, regulatory subunit B, alpha isoform (calcineurin B, type I)	10.7435	10.9007	10.8087	11.0429	10.8686	10.8728
Ppt1	19063	9530043G02Rik|AA960502|C77813|CLN1|D4Ertd184e|INCL|PPT	palmitoyl-protein thioesterase 1	11.5357	11.9812	11.6719	12.0504	11.7242	11.6044
Prkdc	19090	AI326420|AU019811|DNA-PKcs|DNAPDcs|DNAPK|DNPK1|DOXNPH|HYRC1|XRCC7|dxnph|p460|scid|slip	protein kinase, DNA activated, catalytic polypeptide	8.38562	8.68745	8.77123	8.55241	7.97774	8.29608
Mapk11	19094	P38b|Prkm11|Sapk2|Sapk2b|p38-2|p38beta|p38beta2	mitogen-activated protein kinase 11	5.65603	5.4685	5.42654	6.28598	5.16353	5.61801
Prl	19109	AV290867|Prl1a1	prolactin	3.74176	3.56161	4.72199	4.80599	4.42657	4.49771
Prlr	19116	AI987712|Pr-1|Pr-3|Prlr-rs1	prolactin receptor	10.871	6.57656	8.04925	5.2585	9.53973	11.9414
Npepps	19155	AAP-S|MP100|Psa|R74825|goku	aminopeptidase puromycin sensitive	9.38339	9.51775	9.41831	9.29953	9.21374	9.35353
Psmb10	19171	Mecl-1|Mecl1	proteasome (prosome, macropain) subunit, beta type 10	9.63003	10.0521	9.98947	10.5887	10.3038	9.78953
Ptafr	19204	PAFR	platelet-activating factor receptor	12.2492	11.8443	12.0091	12.1566	12.2382	12.4602
Ptger4	19219	EP4|Ptgerep4	prostaglandin E receptor 4 (subtype EP4)	8.45917	9.25277	9.05722	9.46795	8.85283	8.68496
Ptgs2	19225	COX2|Cox-2|PES-2|PGHS-2|PHS II|PHS-2|Pghs2|TIS10|gripghs	prostaglandin-endoperoxide synthase 2	8.62252	9.87902	9.70351	9.68476	9.10213	8.75223
Ptk2b	19229	CADTK|CAKB|CAKbeta|E430023O05Rik|FADK2|FAK2|PYK2|Raftk	PTK2 protein tyrosine kinase 2 beta	9.38562	10.8608	10.6307	10.9439	10.3859	10.1264
Ptpn11	19247	2700084A17Rik|AW536184|PTP1D|PTP2C|SAP-2|SH-PTP2|SH-PTP3|SHP-2|Shp2|Syp	protein tyrosine phosphatase, non-receptor type 11	10.3889	10.3966	10.5043	10.4769	10.4228	10.3665
Dusp1	19252	3CH134|MKP1|Ptpn16|U19515|erp|mkp-1	dual specificity phosphatase 1	12.68	12.3903	12.4848	12.2974	12.6268	12.641
Ptpn18	19253	FLP1|HSCF|PTP-HSCF|PTP-K1|Ptpk1	protein tyrosine phosphatase, non-receptor type 18	10.516	10.5119	10.2043	11.0175	10.7831	10.6918
Ptpn2	19255	AI325124|Ptpt|TC-PTP	protein tyrosine phosphatase, non-receptor type 2	9.48426	9.55219	9.55582	9.75035	9.51403	9.49575
Ptpn22	19260	70zpep|PEP|Ptpn8	protein tyrosine phosphatase, non-receptor type 22 (lymphoid)	9.44646	10.4092	10.3594	10.6375	9.98966	10.2256
Ptprc	19264	B220|CD45R|Cd45|L-CA|Ly-5|Lyt-4|T200|loc	protein tyrosine phosphatase, receptor type, C	11.6874	12.8951	12.7937	12.9743	12.4237	12.2549
Ptprj	19271	AI450271|BET|Byp|CD148|DEP-1|PTPbeta2|Ptpb2|RPTPJ|Scc-1|Scc1	protein tyrosine phosphatase, receptor type, J	11.5347	12.0757	11.9682	11.8946	11.5604	11.8031
Ptprk	19272	AI853699|PTPk|RPTPkappa	protein tyrosine phosphatase, receptor type, K	8.61117	5.50021	6.39337	5.08162	6.27901	7.75551
Ptprs	19280	AL022616|PTP|PTP-NU3|PTPNU-3|PTPsigma|Ptpt9|R-PTP-S|RPTPsigma	protein tyrosine phosphatase, receptor type, S	8.71374	8.22931	8.49067	8.20911	8.23392	8.30058
Rac1	19353	AL023026|D5Ertd559e	RAS-related C3 botulinum substrate 1	11.8627	12.1491	12.1095	12.3917	12.2354	12.0325
Rag1	19373	Rag-1	recombination activating gene 1	2.36325	3.14657	3.55207	3.72799	3.25664	2.55911
Rara	19401	Nr1b1|RAR|RARalpha1	retinoic acid receptor, alpha	8.81611	8.41544	8.55956	8.20911	8.4514	8.89599
Rasgrf1	19417	AI844718|CDC25|CDC25Mm|Gnrp|Grf1|Grfbeta|P190-A|Ras-GRF1|p190|p190RhoGEF	RAS protein-specific guanine nucleotide-releasing factor 1	4.21124	3.97665	4.9671	3.87999	4.25664	5.1836
Rasgrp1	19419	Rasgrp	RAS guanyl releasing protein 1	8.34053	9.4665	9.75174	9.76995	9.35204	9.30731
Rbl2	19651	PRB2|RBR-2|Rb2|p130	retinoblastoma-like 2	9.11278	9.68401	9.43063	9.84346	9.49026	9.59254
Rela	19697	p65	v-rel reticuloendotheliosis viral oncogene homolog A (avian)	9.0385	8.83463	8.98391	8.59148	8.99811	8.93415
Reln	19699	reeler|rl	reelin	7.62628	3.784	4.77446	4.87999	5.16353	4.61801
Rgs16	19734	Rgs14|Rgsr	regulator of G-protein signaling 16	8.04132	8.23404	8.34648	8.87094	8.88235	8.47798
Rgs2	19735	GOS8	regulator of G-protein signaling 2	11.1706	11.7428	11.3907	11.909	11.7389	11.3437
Rheb	19744	Rheb1	Ras homolog enriched in brain	11.0434	11.1226	11.1251	11.3129	11.213	11.084
Rock1	19877	1110055K06Rik|Rock-I	Rho-associated coiled-coil containing protein kinase 1	9.44859	9.90738	9.98669	9.72045	9.30377	9.6624
Mst1r	19882	CD136|CDw136|Fv-2|Fv2|PTK8|Ron|STK	macrophage stimulating 1 receptor (c-met-related tyrosine kinase)	3.50075	4.22458	3.87399	3.36542	4.16353	4.06161
Rora	19883	9530021D13Rik|Nr1f1|ROR1|ROR2|ROR3|nmf267|sg|staggerer|tmgc26	RAR-related orphan receptor alpha	8.54515	8.61327	8.70181	8.73299	8.71607	9.0563
Rras	20130	AI573426	Harvey rat sarcoma oncogene, subgroup R	9.49047	9.30532	9.35727	9.46795	9.42907	9.55723
Dhrs3	20148	Rsdr1|retSDR1	dehydrogenase/reductase (SDR family) member 3	8.90551	9.03193	9.06777	8.69761	9.07042	9.33609
Rxrg	20183	Nr2b3	retinoid X receptor gamma	3.04132	3.97665	3.13703	3.14302	2.25664	3.43358
Scp2	20280	AA409774|AA409893|C76618|C79031|NSL-TP|SCP-2|SCP-X|SCPX|ns-LTP	sterol carrier protein 2, liver	8.68517	8.99067	8.93577	8.92438	8.60979	8.90784
Ccl12	20293	MCP-5|Scya12	chemokine (C-C motif) ligand 12	10.6933	13.4398	13	13.3353	13.3395	11.7596
Ccl2	20296	AI323594|HC11|JE|MCAF|MCP-1|MCP1|SMC-CF|Scya2|Sigje	chemokine (C-C motif) ligand 2	12.1245	12.9968	13.0355	13.1529	13.1562	12.2439
Ccl20	20297	CKb4|LARC|MIP-3A|MIP-3[a]|MIP3A|ST38|Scya20|exodus-1	chemokine (C-C motif) ligand 20	6.12878	4.29858	4.42654	4.55806	3.95708	4.06161
Ccl22	20299	ABCD-1|DCBCK|MDC|Scya22	chemokine (C-C motif) ligand 22	8.36325	8.49628	9.14701	9.1203	9.04128	8.87502
Ccl3	20302	AI323804|G0S19-1|LD78alpha|MIP-1alpha|MIP1-(a)|MIP1-alpha|Mip1a|Scya3	chemokine (C-C motif) ligand 3	8.9086	9.21505	9.2174	9.49175	9.56042	8.99929
Ccl4	20303	AT744.1|Act-2|MIP-1B|Mip1b|Scya4	chemokine (C-C motif) ligand 4	8.53717	8.70457	8.72865	9.16539	9.44647	8.82277
Ccl5	20304	MuRantes|RANTES|SISd|Scya5|TCP228	chemokine (C-C motif) ligand 5	11.4153	12.7631	12.2207	13.095	12.3075	12.2105
Cxcl2	20310	CINC-2a|GROb|Gro2|MIP-2|MIP-2a|Mgsa-b|Mip2|Scyb|Scyb2	chemokine (C-X-C motif) ligand 2	9.70666	9.67013	9.83747	9.5296	9.50457	9.50358
Sel1l	20338	AW493766|Sel1h|mKIAA4137	sel-1 suppressor of lin-12-like (C. elegans)	9.47803	9.71136	9.84822	9.68734	9.5898	9.75551
Sele	20339	CD62E|E-selectin|ELAM-1|Elam|LECAM2	selectin, endothelial cell	5.46758	5.53124	5.66754	5.14302	5.50457	6.48194
Sell	20343	AI528707|CD62L|L-selectin|LECAM-1|Lnhr|Ly-22|Ly-m22|Lyam-1|Lyam1	selectin, lymphocyte	8.56488	9.70797	9.33997	10.2393	9.52343	9.41294
Sema4d	20354	CD100|Semacl2|Semaj|Semcl2|coll-4	sema domain, immunoglobulin domain (Ig), transmembrane domain (TM) and short cytoplasmic domain, (semaphorin) 4D	9.28211	10.7896	10.6571	10.9482	10.5741	9.85679
Foxp3	20371	JM2|scurfin|sf	forkhead box P3	6.53317	7.96533	7.70181	8.37184	7.92907	7.70886
Sfrp1	20377	2210415K03Rik|AW011917|AW107218|AW742929|sFRP-1	secreted frizzled-related protein 1	6.69953	5.14657	6.30695	5.64552	5.3441	6.14407
Sftpa1	20387	SP-A|Sftp-1|Sftp1	surfactant associated protein A1	3.04132	3.67709	3.13703	4.80599	4.25664	4.36647
Sh2d1a	20400	Gm686|SAP	SH2 domain containing 1A	6.72782	7.13652	6.95579	8.30625	7.59649	7.67459
Slc2a3	20527	AA408729|AL023014|AL024341|AU040424|C78366|Glut-3|Glut3	solute carrier family 2 (facilitated glucose transporter), member 3	6.30811	6.93084	6.86192	7.4888	7.11462	6.97415
Slc7a5	20539	4F2LC|D0H16S474E|LAT1|TA1	solute carrier family 7 (cationic amino acid transporter, y+ system), member 5	9.04975	8.16152	8.59281	8.50058	8.42657	8.3317
Slc8a1	20541	AI852629|AV344025|D930008O12Rik|Ncx1	solute carrier family 8 (sodium/calcium exchanger), member 1	9.46758	10.5578	10.4669	10.2877	9.76444	9.83057
Snai2	20583	Slug|Slugh|Snail2	snail family zinc finger 2	8.15506	5.3342	5.82508	5.14302	5.81123	6.48194
Smarca4	20586	Brg1|HP1-BP72|SNF2beta|SW1/SNF|b2b508.1Clo|b2b692Clo	SWI/SNF related, matrix associated, actin dependent regulator of chromatin, subfamily a, member 4	10.3497	10.4584	10.5293	10.3096	10.11	10.2066
Siglec1	20612	Cd169|Siglec-1|Sn	sialic acid binding Ig-like lectin 1, sialoadhesin	10.8012	12.038	12.3921	12.0036	11.7851	11.2756
Sos1	20662	4430401P03Rik|9630010N06|AI449023	son of sevenless homolog 1 (Drosophila)	9.12613	9.26667	9.22685	9.01749	8.72832	9.02127
Sos2	20663	SOS-2|mSOS-2	son of sevenless homolog 2 (Drosophila)	9.60737	9.77593	9.6536	9.57208	9.55814	9.67632
Sp100	20684	A430075G10Rik	nuclear antigen Sp100	10.6253	11.873	11.7964	11.8755	11.74	11.212
Stag2	20843	9230105L23Rik|B230112I07Rik|SA-2|SAP2	stromal antigen 2	9.56684	9.60783	9.5483	9.54105	9.19622	9.51911
Stat1	20846	2010005J02Rik|AA408197	signal transducer and activator of transcription 1	12.0929	13.0732	13.0312	13.4422	13.2025	12.5659
Stat3	20848	1110034C02Rik|AW109958|Aprf	signal transducer and activator of transcription 3	12.1632	12.2519	12.1878	12.2628	12.04	12.0375
Stat4	20849	-	signal transducer and activator of transcription 4	6.93614	7.38604	7.33343	8.04188	7.3441	7.75551
Stc1	20855	Stc	stanniocalcin 1	8.11813	6.93084	7.28903	5.80599	6.32273	6.466
Stc2	20856	AW125853|Stc2l|mustc2	stanniocalcin 2	9.54316	7.69089	7.94438	6.62415	9.62733	10.6918
Stim1	20866	SIM	stromal interaction molecule 1	9.41418	9.44425	9.56329	9.52673	9.56498	9.54211
Syk	20963	Sykb	spleen tyrosine kinase	11.3394	11.6714	11.7497	11.5567	11.5501	11.6948
Tapbp	21356	D17Wsu91e|TPN	TAP binding protein	9.24833	9.52354	9.77767	9.94176	9.91842	9.53066
Hnf1a	21405	AI323641|HNF1|HNF1-alpha|HNF1[a]|Hnf-1|Hnf1alpha|LFB1|Tcf-1|Tcf1	HNF1 homeobox A	2.62628	2.97665	2.9671	4.14302	4.16353	2.97415
Tcf7	21414	AI465550|TCF-1|Tcf1	transcription factor 7, T cell specific	7.8551	8.28953	8.05457	8.98012	8.56498	8.60351
Tcl1	21432	Tcl1a	T cell lymphoma breakpoint 1	3.84867	4.06411	2.9671	4.14302	4.25664	3.97415
Tcrg-V4	21638	AI528624|TRGV4|Vg4	T cell receptor gamma, variable 4	5.36325	5.10593	5.21503	6.04991	5.4661	5.40041
Tcrg-V5	21639	TRGV5	T cell receptor gamma, variable 5	3.74176	4.73154	4.42654	5.01749	4.7802	4.43358
Tcrg-V6	21640	TRGV6	T cell receptor gamma, variable 6	4.36325	4.73154	3.87399	4.80599	4.16353	3.7815
Tcrg-V7	21641	TRGV7|Vg7	T cell receptor gamma, variable 7	4.74176	4.29858	4.77446	4.2585	5.01153	4.83213
Tert	21752	EST2|TCS1|TP2|TR|TRT	telomerase reverse transcriptase	5.79621	3.97665	4.42654	4.87999	4.64896	4.43358
Tgfb1	21803	TGF-beta1|TGFbeta1|Tgfb|Tgfb-1	transforming growth factor, beta 1	11.8511	12.5262	12.4749	12.6042	12.3351	12.2567
Tgfb2	21808	BB105277|Tgf-beta2|Tgfb-2	transforming growth factor, beta 2	7.48426	4.784	5.21503	5.01749	5.95708	6.29608
Timp1	21857	Clgi|EPA|TIMP-1|TPA-S1|Timp	tissue inhibitor of metalloproteinase 1	6.59591	7.99902	8.3114	7.59148	7.62296	6.6884
Tle4	21888	5730411M05Rik|AA792082|Bce-1|Bce1|ESTM13|ESTM14|Grg4|X83332|X83333|grg-4	transducin-like enhancer of split 4, homolog of Drosophila E(spl)	8.53317	8.90146	8.89784	9.08162	8.5281	8.58886
Tlr1	21897	-	toll-like receptor 1	8.46758	10.0548	9.56702	9.78928	9.21374	8.89301
Tnf	21926	DIF|TNF-a|TNF-alpha|TNFSF2|TNFalpha|Tnfa|Tnfsf1a	tumor necrosis factor	9.31278	9.134	9.16678	9.4799	9.38076	9.12897
Tnfaip3	21929	A20|Tnfip3	tumor necrosis factor, alpha-induced protein 3	11.2599	11.9033	12.1677	11.8834	11.8524	11.7742
Tnfrsf10b	21933	DR5|KILLER|Ly98|MK|TRAILR2|TRICK2A|TRICK2B|TRICKB	tumor necrosis factor receptor superfamily, member 10b	7.8615	6.77106	7.41005	6.70781	6.98456	7.50553
Tnfrsf17	21935	BCM|BCMA|Tnfrsf13|Tnfrsf13a	tumor necrosis factor receptor superfamily, member 17	7.07474	5.3342	6.25251	6.04991	6.71607	7.314
Tnfrsf18	21936	AITR|Gitr	tumor necrosis factor receptor superfamily, member 18	7.88681	9.07205	8.87399	9.54675	8.99473	8.8165
Tnfrsf1a	21937	CD120a|FPF|TNF-R|TNF-R-I|TNF-R1|TNF-R55|TNF-alphaR1|TNFAR|TNFR60|TNFRI|TNFRp55|TNFalpha-R1|Tnfr-2|Tnfr1|p55|p55-R	tumor necrosis factor receptor superfamily, member 1a	11.1013	11.2516	11.1802	11.2706	11.171	11.2126
Tnfrsf1b	21938	CD120b|TNF-R-II|TNF-R2|TNF-R75|TNF-alphaR2|TNFBR|TNFR80|TNFRII|TNFalpha-R2|Tnfr-1|Tnfr2|p75	tumor necrosis factor receptor superfamily, member 1b	8.39447	9.21744	9.18869	9.47394	9.13009	9.04829
Cd40	21939	AI326936|Bp50|GP39|HIGM1|IGM|IMD3|T-BAM|TRAP|Tnfrsf5|p50	CD40 antigen	8.47595	10.0561	9.84822	10.3654	9.65965	9.01854
Cd27	21940	S152|Tnfrsf7|Tp55	CD27 antigen	5.46758	6.1861	5.58181	6.17277	5.9005	6.22208
Tnfrsf9	21942	4-1BB|A930040I11Rik|AA408498|AI325004|CDw137|Cd137|ILA|Ly63	tumor necrosis factor receptor superfamily, member 9	7.8095	9.77106	9.57073	10.3443	9.54666	9.04024
Cd40lg	21947	CD154|CD40-L|Cd40l|HIGM1|IGM|IMD3|Ly-62|Ly62|T-BAM|TRAP|Tnfsf5|gp39	CD40 ligand	5.94821	6.64907	6.42654	7.59148	7.7485	7.49771
Cd70	21948	CD27LG|Cd27l|Tnfsf7	CD70 antigen	4.79621	4.36897	4.28903	5.14302	4.42657	3.88104
Tnfsf9	21950	4-1BB-L|4-1BBL|AI848817|Cd137l|Ly63l	tumor necrosis factor (ligand) superfamily, member 9	5.99552	6.1264	6.27088	5.95038	6.01153	5.7815
Tpp2	22019	TPP-2|TppII	tripeptidyl peptidase II	11.1544	11.8162	11.7257	11.7405	11.226	11.2699
Traf2	22030	AI325259	TNF receptor-associated factor 2	10.2175	9.90294	9.79999	9.90236	9.76642	9.91666
Tnfsf10	22035	A330042I21Rik|AI448571|APO-2L|Ly81|TL2|Trail	tumor necrosis factor (ligand) superfamily, member 10	8.85189	9.43608	9.34431	9.55241	9.66391	9.40878
Plscr1	22038	MmTRA1a|MmTRA1b|Nor1|Tra1|Tra1a|Tra1b|Tras1|Tras2	phospholipid scramblase 1	9.8551	9.70287	9.36585	9.73049	9.37558	9.06955
Trpc1	22063	Mtrp1|Trp1|Trrp1	transient receptor potential cation channel, subfamily C, member 1	4.8993	4.43608	4.35942	4.14302	4.64896	5.06161
Trpc6	22068	AV025995|LLHWJM002|LLHWJM003|LLHWJM004|TRP-6|Trrp6|mtrp6	transient receptor potential cation channel, subfamily C, member 6	5.87421	4.67709	5.35942	3.55806	5.7485	7.28703
Ttk	22137	AL022661|Esk1|Mps1|PYT|esk	Ttk protein kinase	6.32672	6.28043	6.39337	6.36542	5.57857	5.22208
Twist1	22160	AA960487|M-Twist|Pde|Ska10|Ska<m10Jus>|Twist|bHLHa38|pdt	twist basic helix-loop-helix transcription factor 1	6.1706	6.36897	5.94438	5.76751	5.54204	5.75551
Tnfrsf4	22163	ACT35|CD134|Ly-70|Ox40|TXGP1L|Txgp1	tumor necrosis factor receptor superfamily, member 4	6.99552	8.23404	7.89784	9.03379	8.46121	8.10343
Tnfsf4	22164	Ath-1|Ath1|CD134L|OX-40L|Ox40l|TXGP1|Txgp1l|gp34	tumor necrosis factor (ligand) superfamily, member 4	3.62628	5.29858	4.82508	5.36542	5.11462	4.29608
Tyrobp	22177	DAP12|KARAP|Ly83	TYRO protein tyrosine kinase binding protein	13.6976	14.217	14.0001	14.6401	14.3439	13.976
Ube2i	22196	5830467E05Rik|F830028O17Rik|UBC9|Ubce2i|Ubce9	ubiquitin-conjugating enzyme E2I	12.325	12.4167	12.2986	12.5407	12.3241	12.2283
Sumo1	22218	GMP1|PIC1|SENTRIN|SMT3|SMT3H3|SMTP3|SUMO-1|Smt3C|Ubl1	small ubiquitin-like modifier 1	11.2946	10.8339	10.796	11.1774	11.205	11.2161
Ucp1	22227	AI385626|Slc25a7|Ucp	uncoupling protein 1 (mitochondrial, proton carrier)	3.50075	3.14657	2.77446	3.36542	3.8416	3.55911
Vav2	22325	2810040F13Rik|AI847175	vav 2 oncogene	9.84545	9.95964	9.95721	9.64552	9.74046	9.9152
Vcam1	22329	CD106|Vcam-1	vascular cell adhesion molecule 1	9.07749	8.60964	8.93	8.55241	8.89689	9.3295
Vdac1	22333	AL033343|Vdac5	voltage-dependent anion channel 1	10.4422	10.3342	10.3454	10.6079	10.4341	10.2791
Vegfa	22339	Vegf|Vpf	vascular endothelial growth factor A	9.79954	11.1371	11.0399	11.1021	10.3936	9.7815
Wnt11	22411	-	wingless-type MMTV integration site family, member 11	5.56488	3.97665	5.79999	4.55806	5.16353	4.97415
Wnt2	22413	2610510E18Rik|Int1l1|Irp|Mirp|Wnt-2|Wnt2a	wingless-type MMTV integration site family, member 2	3.50075	2.784	3.42653	3.36542	3.8416	3.55911
Wnt3	22415	Int-4|Wnt-3	wingless-type MMTV integration site family, member 3	3.94821	4.22458	3.9671	3.36542	4.16353	3.7815
Wnt3a	22416	Wnt-3a|vt	wingless-type MMTV integration site family, member 3A	2.36325	2.97665	3.77446	3.14302	3.25664	1.97415
Wnt4	22417	Wnt-4	wingless-type MMTV integration site family, member 4	5.97206	3.67709	4.13703	4.2585	4.71607	5.43358
Wnt6	22420	AA409270|Wnt-6	wingless-type MMTV integration site family, member 6	5.59591	4.6205	4.05457	4.36542	5.064	4.49771
Dctn6	22428	AU044699|WS-3|p27	dynactin 6	9.49459	9.82057	9.73363	9.98642	9.56042	9.6884
Yes1	22612	Yes|p61-Yes	Yamaguchi sarcoma viral (v-yes) oncogene homolog 1	8.82922	5.99902	6.77446	5.46495	7.064	8.15406
Ywhaz	22631	1110013I11Rik|14-3-3zeta|AI596267|AL022924|AU020854	tyrosine 3-monooxygenase/tryptophan 5-monooxygenase activation protein, zeta polypeptide	11.9977	11.9858	11.979	12.0484	11.9854	11.8855
Yy1	22632	AW488674|NF-E1	YY1 transcription factor	10.9429	11.0448	10.9853	11.0358	10.8556	10.8652
Zap70	22637	Srk|ZAP-70|mrtle|mur	zeta-chain (TCR) associated protein kinase	7.05255	8.06941	7.67446	8.69249	8.23392	8.00757
Ikzf1	22778	5832432G11Rik|Ikaros|LyF-1|Zfpn1a1|Znfn1a1|hlk-1|mKIAA4227	IKAROS family zinc finger 1	10.1301	11.2151	11.0379	11.3029	10.8695	10.691
Akt3	23797	AI851531|D930002M15Rik|Nmf350	thymoma viral proto-oncogene 3	9.24589	9.5484	9.6501	9.47692	9.20209	9.4046
Clca1	23844	Clca2|Clca3|gob-5|gob5	chloride channel calcium activated 1	4.04132	3.56161	4.42654	3.87999	5.68291	5.01854
Grem2	23893	Gremlin2|Prdc	gremlin 2 homolog, cysteine knot superfamily (Xenopus laevis)	4.94821	5.22458	5.28903	5.64552	4.71607	5.22208
Hcst	23900	DAP10|KAP10	hematopoietic cell signal transducer	7.3451	7.28953	7.32466	8.08944	7.8491	7.70886
Nt5e	23959	2210401F01Rik|AI447961|CD73|NT|Nt5|eNT	5' nucleotidase, ecto	7.3451	8.6277	8.42653	8.45288	8.41146	7.89896
Tlr2	24088	Ly105	toll-like receptor 2	11.0013	12.1702	11.96	12.2309	11.8991	11.2768
Ceacam1	26365	Bgp|Bgp1|C-CAM|CD66a|Cc1|Cea-1|Cea-7|Cea1|Cea7|Hv-2|Hv2|MHVR|MHVR1|Mhv-1|bb-1|mCEA1|mmCGM1|mmCGM1a|mmCGM2	carcinoembryonic antigen-related cell adhesion molecule 1	9.00999	7.45238	7.98391	7.53534	7.54204	8.22208
Ceacam2	26367	AI267129|Bgp2|Ceacam2-L	carcinoembryonic antigen-related cell adhesion molecule 2	4.56488	4.67709	5.0115	4.80599	4.8416	4.55911
Dapp1	26377	Bam32	dual adaptor for phosphotyrosine and 3-phosphoinositides 1	9.00132	9.12893	9.13452	9.33942	9.0543	9.22918
Map2k2	26396	AA589381|MEK2|MK2|Prkmk2	mitogen-activated protein kinase kinase 2	9.94219	10.1213	10.2537	10.1635	10.1037	9.95999
Map3k8	26410	Cot|Cot/Tpl2|Est|Estf|Tpl-2|Tpl2|c-COT	mitogen-activated protein kinase kinase kinase 8	9.45071	9.78883	9.68991	9.91561	9.54435	9.65363
Mapk1	26413	9030612K14Rik|AA407128|AU018647|C78273|ERK|Erk2|MAPK2|PRKM2|Prkm1|p41mapk|p42mapk	mitogen-activated protein kinase 1	11.1374	11.1541	11.0717	11.2732	11.0592	11.134
Mapk10	26414	C230008H04Rik|JNK3|JNK3B1|JNK3B2|SAPK(beta)|Serk2|p493F12|p54bSAPK	mitogen-activated protein kinase 10	3.21124	3.29858	2.77446	3.55806	3.71607	3.55911
Mapk13	26415	SAPK4|Serk4	mitogen-activated protein kinase 13	9.38562	6.90739	6.94438	6.62415	7.73238	8.51331
Mapk14	26416	CSBP2|Crk1|Csbp1|Mxi2|PRKM14|PRKM15|p38|p38-alpha|p38MAPK|p38a|p38alpha	mitogen-activated protein kinase 14	11.0129	11.2452	11.1911	11.1654	10.9956	11.1378
Mapk3	26417	Erk-1|Erk1|Ert2|Esrk1|Mnk1|Mtap2k|Prkm3|p44|p44erk1|p44mapk	mitogen-activated protein kinase 3	10.9698	11.1021	11.0585	10.9916	11.1355	11.1365
Mapk8	26419	AI849689|JNK|JNK1|Prkm8|SAPK1	mitogen-activated protein kinase 8	8.41636	8.25742	8.15198	8.1203	7.8265	8.19815
Mapk9	26420	AI851083|JNK2|Prkm9|p54aSAPK	mitogen-activated protein kinase 9	8.84222	9.11364	9.05986	9.3096	9.00148	9.10085
Nbea	26422	Lyst2|mKIAA1544	neurobeachin	7.54116	5.29858	5.69502	4.87999	5.92907	6.91666
Orc4	26428	Orc4P|Orc4l|mMmORC4	origin recognition complex, subunit 4	9.90085	10.0628	9.98669	9.89345	9.66815	9.89599
Psma1	26440	C2|HC2|Pros-30|alpha-type	proteasome (prosome, macropain) subunit, alpha type 1	11.7071	11.8764	11.7869	12.268	11.8942	11.5893
Psma6	26443	IOTA	proteasome (prosome, macropain) subunit, alpha type 6	12.465	12.1991	12.0187	12.6973	12.3895	12.1258
Aifm1	26926	AIF|AIFsh2|Hq|Pdcd8	apoptosis-inducing factor, mitochondrion-associated 1	9.42934	9.06676	9.24323	9.02158	8.964	8.94856
Ppp2r5c	26931	2610043M05Rik|2700063L20Rik|AI060890|AW545884|C85228|D12Bwg0916e|mKIAA0044	protein phosphatase 2, regulatory subunit B', gamma	11.142	11.2073	11.0618	11.371	11.0728	11.0996
Ppp2r5e	26932	4633401M22Rik|AI449017|B56beta	protein phosphatase 2, regulatory subunit B', epsilon	8.72782	8.41128	8.35512	8.29953	8.08953	8.49379
Cul1	26965	-	cullin 1	10.8993	10.9928	10.9082	10.9568	10.6787	10.9086
Klrk1	27007	D6H12S2489E|NKG2-D|Nkg2d	killer cell lectin-like receptor subfamily K, member 1	10.2361	11.5456	11.1655	12.0574	11.5587	10.8997
Pdk4	27273	AV005916	pyruvate dehydrogenase kinase, isoenzyme 4	7.40764	5.02104	5.52169	4.2585	5.38593	7.07218
Trim36	28105	D18Wsu100e|haprin	tripartite motif-containing 36	7.55702	7.69775	7.77446	7.45288	7.50457	7.61801
Fbxw4	30838	Dac|Fbw4|SHFM3|SHSF3|dactylin|dactylyn	F-box and WD-40 domain protein 4	7.30811	7.23404	7.12697	7.08162	7.038	7.44176
Slamf6	30925	KAL1|KAL1b|Ly108|NTB-A|NTBA|SF2000	SLAM family member 6	6.64123	8.25742	8.03857	8.36541	7.97089	7.70207
Icosl	50723	AU044799|B7-H2|B7RP-1|B7h|BG071784|GI50|GL50|GL50-B|ICOS-L|Icoslg|LICOS|Ly115l|mKIAA0653	icos ligand	8.87104	10.285	9.95721	10.1411	9.69335	9.28021
Acsl4	50790	9430020A05Rik|ACS4|AU018108|Facl4|Lacs4	acyl-CoA synthetase long-chain family member 4	10.5756	11.2043	11.0618	11.2393	10.9032	10.7903
Magi2	50791	AIP-1|Acvri1|Acvrinp1|Acvrip1|Magi-2|S-SCAM|mKIAA0705	membrane associated guanylate kinase, WW and PDZ domain containing 2	4.04132	3.97665	4.28903	4.95038	3.8416	3.88104
Klrg1	50928	2F1-Ag|MAFA|MAFA-L	killer cell lectin-like receptor subfamily G, member 1	6.8993	7.40291	6.88597	8.03379	7.69959	7.91666
Il27ra	50931	CRL1|IL-27R|Tccr|WSX-1|Wsx1|zcytor1	interleukin 27 receptor, alpha	5.74176	6.48444	6.19592	6.95038	6.56042	6.22208
Ppp2r1a	51792	6330556D22Rik|PP2A|PR65	protein phosphatase 2, regulatory subunit A, alpha	11.677	11.5465	11.5374	11.7448	11.6339	11.6194
Ccnc	51813	AI451004|AU020987|CG1C	cyclin C	8.42934	8.45238	8.48674	8.75773	8.51403	8.40041
Anapc4	52206	2610306D21Rik|APC4|D5Ertd249e	anaphase promoting complex subunit 4	7.77603	7.50803	7.72199	7.60245	7.35467	7.69525
Tax1bp1	52440	1200003J11Rik|1700069J21Rik|AA930106|D6Ertd404e|D6Ertd772e|T6bp|TXBP151	Tax1 (human T cell leukemia virus type I) binding protein 1	11.4374	11.2545	11.2421	11.28	11.1613	11.2653
Lair1	52855	5133400O11Rik|BB115266|D7Bwg0421e|Lair-1	leukocyte-associated Ig-like receptor 1	8.17575	9.87298	9.40173	9.93744	9.43157	8.64303
Batf	53314	B-ATF|SFA-2	basic leucine zipper transcription factor, ATF-like	8.4884	8.97665	8.91547	9.26196	8.89327	8.97415
Tslp	53603	-	thymic stromal lymphopoietin	9.88994	8.50021	8.27544	8.30625	9.34675	10.2244
Icos	54167	AILIM|CCLP|CRP-1|H4|Ly115	inducible T cell co-stimulator	8.41636	10.3754	10.017	10.6976	10.2832	10.0996
Rragc	54170	AU041672|Gtr2|RAGC|TIB929|YGR163W	Ras-related GTP binding C	10.7547	11.1603	10.9769	11.2706	10.9922	10.9291
Cd160	54215	AU045688|By55	CD160 antigen	6.38117	6.80954	6.41005	7.58043	7.31192	7.38354
Elovl2	54326	AI317360|Ssc2	elongation of very long chain fatty acids (FEN1/Elo2, SUR4/Elo3, yeast)-like 2	3.21124	2.97665	3.55207	3.87999	3.57857	4.22208
Dnmt3l	54427	D6Ertd14e|ecat7	DNA (cytosine-5-)-methyltransferase 3-like	3.94821	4.67709	3.9671	4.36542	3.42657	3.7815
Nfat5	54446	AI225870|B130038B15Rik|CAG-8|CAG80|NFATL1|OREBP|TonEBP|mKIAA0827|nfatz	nuclear factor of activated T cells 5	9.22371	9.22458	9.25943	8.69249	8.39619	9.10343
Dll4	54485	Delta4	delta-like 4 (Drosophila)	6.41636	5.56161	6.44284	5.20192	5.3441	6.70207
St3gal6	54613	1700023B24Rik|AI930218|AW552396|Siat10|St3galVI	ST3 beta-galactoside alpha-2,3-sialyltransferase 6	8.25564	8.23404	7.94438	8.35896	8.38076	8.59254
Crtam	54698	-	cytotoxic and regulatory T cell molecule	4.28925	5.90739	4.87399	5.72799	5.01153	4.97415
Tyk2	54721	JTK1	tyrosine kinase 2	8.7102	9.00455	9.18627	8.95038	8.99473	8.92835
Sfn	55948	Er|Mme1|Ywhas	stratifin	9.9926	7.3945	8.66059	6.58043	8.02483	8.79433
Smad9	55994	MADH6|Madh8|Madh9|Smad8	SMAD family member 9	2.36325	3.29858	3.42653	2.87999	3.71607	3.7815
Cxcl11	56066	Cxc11|H174|I-tac|Ip9|Itac|Scyb11|Scyb9b|b-R1|betaR1	chemokine (C-X-C motif) ligand 11	7.70666	11.0258	10.9985	11.8295	10.6164	9.14407
Hdac7	56233	5830434K02Rik|HD7|HD7a|Hdac7a|mFLJ00062	histone deacetylase 7	7.19107	7.7382	7.66059	7.66658	7.33346	7.81964
Tmed2	56334	1110032D12Rik|1810020N21Rik|Rnp24|Sid394|p24beta1	transmembrane emp24 domain trafficking protein 2	10.1341	9.87902	9.97833	10.2757	10.1332	10.097
Rbx1	56438	1500002P15Rik|AA517855|ROC1	ring-box 1	11.2665	11.3193	11.1606	11.6705	11.4127	11.1434
Foxo1	56458	AI876417|Afxh|FKHR|Fkhr1|Foxo1a	forkhead box O1	9.20119	8.27586	8.43878	8.57487	8.3441	8.83213
Pias1	56469	2900068C24Rik|Ddxbp1|GBP	protein inhibitor of activated STAT 1	8.66337	8.971	8.71865	8.76751	8.65752	8.89896
Tbk1	56480	1200008B05Rik|AI462036|AW048562	TANK-binding kinase 1	10.0966	10.5332	10.4132	10.3654	10.1177	10.2561
Foxo3	56484	1110048B16Rik|2010203A17Rik|C76856|FKHRL1|Fkhr2|Foxo3a	forkhead box O3	10.3934	9.91329	9.9271	9.8178	9.67238	10.1353
Gsk3b	56637	7330414F15Rik|8430431H08Rik|C86142|GSK-3|GSK-3beta|GSK3	glycogen synthase kinase 3 beta	9.74002	9.86082	9.90079	9.80123	9.43157	9.68668
Lamtor3	56692	AW556229|Map2k1ip1|Mapbp|Mapksp1|Mp1	late endosomal/lysosomal adaptor, MAPK and MTOR activator 3	9.94821	10.0773	10.0625	10.1838	10.0082	10.1124
Clcf1	56708	BSF-3|Bsf3|CLC|NNT-1	cardiotrophin-like cytokine factor 1	5.62628	6.06411	5.9671	5.84346	6.23392	6.1239
Aldh1a3	56847	ALDH6|RALDH3|V1	aldehyde dehydrogenase family 1, subfamily A3	7.3451	3.43608	4.35942	4.14302	4.71607	7.1836
Vav3	57257	A530094I06Rik|AA986410|Idd18.1	vav 3 oncogene	8.71374	8.75801	8.82508	8.66658	8.38076	8.73237
Fzd2	57265	AL033370|AW456835|Fz10|Fzd10|Mfz10|Mfz10a	frizzled homolog 2 (Drosophila)	6.68518	4.29858	5.49067	4.95038	5.01153	5.25955
Pglyrp2	57757	C730002N09Rik|PGRP-L|Pglyrpl|tagL	peptidoglycan recognition protein 2	4.36325	5.6205	4.61096	6.01749	5.95708	5.3317
Tbx21	57765	TBT1|Tbet|Tblym	T-box 21	5.79621	6.38604	5.89784	6.70781	6.57857	6.22208
Cd200r1	57781	CD200R|Mox2r|OX2R	CD200 receptor 1	9.27494	9.56911	9.64482	9.69761	9.70579	9.80862
Crlf2	57914	CRLM2|Ly114|Tpte2|Tslpr	cytokine receptor-like factor 2	8.89619	9.53698	9.23623	9.57765	9.52108	9.28021
Rsad2	58185	2510004L01Rik|Vig1|cig5	radical S-adenosyl methionine domain containing 2	5.82268	8.07994	8.50238	8.001	8.25664	6.86897
Pdcd1lg2	58205	B7-DC|Btdc|F730015O22Rik|PD-L2	programmed cell death 1 ligand 2	8.84867	9.60783	10.1181	10.2109	10.4153	9.97415
Trpm7	58800	2310022G15Rik|4833414K03Rik|5033407O22Rik|CHAK|CHAK1|LTrpC-7|Ltpr7|Ltrpc7|TRPPLIK	transient receptor potential cation channel, subfamily M, member 7	10.3967	10.5206	10.4679	10.3814	9.89327	10.314
Il21r	60504	NILR	interleukin 21 receptor	7.96018	10.2043	10.0291	10.3734	9.6766	8.85373
Il21	60505	IL-21	interleukin 21	4.04132	4.22458	4.21503	5.08162	4.7802	4.67459
Cd274	60533	A530045L16Rik|B7h1|Pdcd1l1|Pdcd1lg1|Pdl1	CD274 antigen	9.16802	10.6952	10.7444	11.1402	10.352	9.94426
Pmepa1	65112	2210418I02Rik|AW455466|Erg1.2|N4wbp4|Stag1|Tmepai	prostate transmembrane protein, androgen induced 1	8.55702	10.2759	10.2162	9.96533	9.99811	8.82902
Asb4	65255	8430401O13Rik|AV117194|AW060255	ankyrin repeat and SOCS box-containing 4	2.84867	3.43608	4.21503	3.55806	3.42657	3.14407
Snw1	66354	2310008B08Rik|AW048543|NCoA-62|SKIP|Skiip	SNW domain containing 1	9.34282	9.30756	9.14203	9.29615	9.20501	9.23389
Psmd6	66413	2400006A19Rik	proteasome (prosome, macropain) 26S subunit, non-ATPase, 6	10.9646	10.8174	10.6933	11.0267	10.8388	10.6781
Drap1	66556	2310074H19Rik|NC2-alpha	Dr1 associated protein 1 (negative cofactor 2 alpha)	11.1094	11.12	11.0101	11.3702	11.2079	11.1365
Diablo	66593	0610041G12Rik|1700006L01Rik|AU040403|Smac	diablo homolog (Drosophila)	9.14198	8.84393	8.74518	9.04991	9.01819	9.08267
Lrrk2	66725	4921513O20Rik|9330188B09Rik|AW561911|D630001M17Rik|Gm927|cI-46	leucine-rich repeat kinase 2	7.66337	8.06411	8.30249	7.99269	7.58756	7.81335
Trim35	66854	0710005M05Rik|A430106H13Rik|AW046487|HLS5|Mair|NC8|mKIAA1098	tripartite motif-containing 35	7.75556	7.5987	7.92711	7.68734	7.7802	7.76205
Psmc6	67089	2300001E01Rik|AI451058	proteasome (prosome, macropain) 26S subunit, ATPase, 6	11.3823	11.2701	11.0925	11.5028	11.1492	11.0761
Ptgr1	67103	2510002C21Rik|Ltb4dh|Zadh3	prostaglandin reductase 1	9.77772	9.84393	9.77767	10.0559	10.2482	9.70886
Fgf22	67112	2210414E06Rik|FGF-22	fibroblast growth factor 22	3.21124	3.43608	4.35942	3.72799	3.25664	3.55911
Pdhb	68263	2610103L06Rik|AL024199|C81408	pyruvate dehydrogenase (lipoamide) beta	10.0706	9.90146	9.73197	10.0579	9.83596	9.90045
Ppm1f	68606	1110021B16Rik|4933427B07Rik|CaMKPase|Popx2|mKIAA0015	protein phosphatase 1F (PP2C domain containing)	7.4422	7.41128	7.38496	7.03379	7.25664	7.15406
Tab2	68652	1110030N06Rik|A530078N03Rik|Map3k7ip2|mKIAA0733	TGF-beta activated kinase 1/MAP3K7 binding protein 2	10.9232	11.1104	11.0579	11.0757	10.8112	10.8975
Pycr2	69051	1810018M05Rik|P5cr2	pyrroline-5-carboxylate reductase family, member 2	7.86787	8.18122	8.17656	8.46495	8.07042	7.95714
Dydc1	69496	1700029M23Rik	DPY30 domain containing 1	4.21124	3.97665	3.55207	4.2585	3.95708	3.7815
Bst2	69550	2310015I10Rik|Bst-2|C87040|CD317|DAMP-1|GREG	bone marrow stromal cell antigen 2	10.9706	11.9148	11.9458	12.0062	12.4064	11.1403
Cdc16	69957	2700071J12Rik|2810431D22Rik|APC6	CDC16 cell division cycle 16	9.90241	9.17386	9.21266	9.20552	9.41399	9.33828
Prdm16	70673	5730557K01Rik|csp1|mel1	PR domain containing 16	4.28925	2.97665	3.66754	3.36542	4.064	4.29608
Spag9	70834	3110018C07Rik|4733401I23Rik|4831406C20Rik|AW552012|JLP|JSAP2|JSAP2a|Jip4|Mapk8ip4|syd1	sperm associated antigen 9	9.39005	9.5484	9.67619	9.29615	9.05754	9.52874
Telo2	71718	1200003M09Rik|AI415602|Tel2|mKIAA0683	TEL2, telomere maintenance 2, homolog (S. cerevisiae)	6.32672	6.74483	6.6536	6.74788	6.16353	6.40041
Cul2	71745	1300003D18Rik|4932411N15Rik|AI327301|mKIAA4106	cullin 2	9.47595	9.38604	9.15198	9.46795	9.25664	9.1315
Map3k13	71751	C130026N12Rik|LZK	mitogen-activated protein kinase kinase kinase 13	4.36325	3.67709	3.87399	3.72799	3.71607	4.7815
Pdgfd	71785	1110003I09Rik	platelet-derived growth factor, D polypeptide	6.10741	4.83463	5.09639	5.14302	5.61419	6.67459
Cpa4	71791	1110019K20Rik|AV009555	carboxypeptidase A4	3.84867	3.67709	3.87399	4.95038	3.57857	3.88104
Naa50	72117	2600005K24Rik|2810441M03Rik|AW112078|Mak3|Mak3p|Nat13|Nat5|San	N(alpha)-acetyltransferase 50, NatE catalytic subunit	11.2175	11.0555	11.0285	11.1792	11.0445	10.9012
Trim29	72169	1110047J21Rik|2810431N19Rik|4732461M22Rik|AI119726	tripartite motif-containing 29	9.01573	6.50021	7.46695	5.55806	7.64035	7.392
Nkg7	72310	2500004F03Rik	natural killer cell group 7 sequence	9.69416	10.1072	9.78249	11.0072	10.602	10.5249
Aldh1b1	72535	2700007F14Rik	aldehyde dehydrogenase 1 family, member B1	6.8615	7.99902	7.9501	8.13549	7.98456	7.51331
Ccnt2	72949	2900041I18Rik|C81304|CycT2|CycT2a|CycT2b	cyclin T2	8.06369	8.4725	8.48674	8.001	7.89327	8.25492
Nfatc4	73181	3110041H08Rik|AW107667|AW546455|Nfat3	nuclear factor of activated T cells, cytoplasmic, calcineurin dependent 4	6.27014	5.40291	5.52169	4.87999	5.064	5.99652
Ppp2r1b	73699	2410091N08Rik|AI790395	protein phosphatase 2, regulatory subunit A, beta	7.27014	7.69089	7.49848	7.68734	7.36517	7.52874
Irak3	73914	4833428C18Rik|AI563835|IRAK-M	interleukin-1 receptor-associated kinase 3	8.06923	8.61689	8.63244	8.60245	8.29006	8.61077
Dnm1l	74006	6330417M19Rik|AI450666|Dlp1|Dnmlp1|Drp1|python	dynamin 1-like	10.0172	10.285	10.3081	10.0894	9.91307	10.0144
4632428N05Rik	74048	Dies1|PD-1H|VISTA|Vsir	RIKEN cDNA 4632428N05 gene	12.0218	12.9166	12.5742	12.9353	12.4933	12.2662
Usp16	74112	1200004E02Rik|2810483I07Rik|6330514E22Rik|UBPM	ubiquitin specific peptidase 16	9.17575	9.22695	9.19592	9.11648	9.02813	8.98817
Ehhadh	74147	1300002P22Rik|HD|L-PBE|LBFP|LBP|MFP|MFP1|PBFE	enoyl-Coenzyme A, hydratase/3-hydroxyacyl Coenzyme A dehydrogenase	7.84222	7.29858	7.00053	7.40355	7.44647	7.70886
Acsl3	74205	2610510B12Rik|Acs3|C85929|Facl3|Pro2194	acyl-CoA synthetase long-chain family member 3	9.50484	8.10593	8.12698	8.02567	8.31192	8.8165
Cyld	74256	2010013M14Rik|2900009M21Rik|C130039D01Rik|CDMT|CYLD1|EAC|mKIAA0849	cylindromatosis (turban tumor syndrome)	10.138	10.3198	10.1105	10.3718	10.1992	10.2549
Elovl7	74559	9130013K24Rik|AI840082	ELOVL family member 7, elongation of long chain fatty acids (yeast)	7.88052	5.14657	5.09639	4.46495	6.68291	7.392
Pik3cb	74769	1110001J02Rik|AI447572|p110beta	phosphatidylinositol 3-kinase, catalytic, beta polypeptide	9.759	10.1213	9.8934	9.84577	9.69543	9.78793
Dusp9	75590	Dusp4|Mpk4|Pyst3	dual specificity phosphatase 9	5.59591	4.97665	5.49067	5.08162	4.7802	5.06161
Eif4b	75705	2310046H11Rik|AL024095|C85189|Eif4a2	eukaryotic translation initiation factor 4B	11.8008	11.5235	11.513	11.4491	11.3943	11.6602
Sesn3	75747	5630400E15Rik|BC003348|SEST3	sestrin 3	9.83574	8.78722	8.72533	9.08944	8.87135	9.39411
Il31	76399	1700013B14Rik	interleukin 31	4.21124	4.6205	3.42653	4.55806	4.57857	3.67459
Trat1	77647	C030046M14Rik|Tcrim|Trim	T cell receptor associated transmembrane adaptor 1	5.50075	6.64907	6.42654	6.96745	7.02483	6.60351
Ulbp1	77777	A430108B07Rik|MULT1	UL16 binding protein 1	6.78279	7.46046	7.46695	7.17277	6.68291	6.49771
Cpt1c	78070	6530437J22Rik|9630004I06Rik	carnitine palmitoyltransferase 1c	5.46758	4.83463	5.25251	4.72799	4.71607	5.466
Rictor	78757	4921505C17Rik|6030405M08Rik|AVO3|AW492497|D530039E11Rik	RPTOR independent companion of MTOR, complex 2	9.33134	9.35169	9.41005	9.24806	8.87135	9.44988
Hdac9	79221	AV022454|D030072B18Rik|HD7B|HD9|HDRP|Hdac7b|Mitr|mKIAA0744	histone deacetylase 9	7.67794	7.67014	7.72865	7.20192	7.18738	7.8007
Tusc2	80385	1190001E22Rik|AA407686|Fus1|Lgcc|PAP|Pdap2	tumor suppressor candidate 2	8.59207	8.39028	8.15198	8.51806	8.58756	8.64303
Trim2	80890	mKIAA0517|narf	tripartite motif-containing 2	7.84222	5.93084	6.37649	5.68734	5.98456	7.21255
Cxcr6	80901	BB217514|BONZO|STRL33	chemokine (C-X-C motif) receptor 6	8.75556	9.46449	8.84975	10.2826	10.3065	9.9979
Tbl1xr1	81004	8030499H02Rik|A630076E03Rik|AW539987|C21|C230089I12Rik|DC42|Ira1|TBLR1	transducin (beta)-like 1X-linked receptor 1	10.516	10.9752	10.8815	11.0816	10.5931	10.7265
Sf3b1	81898	155kDa|2810001M05Rik|AA409119|Prp10|SAP155|SF3b155|TA-8|Targ4	splicing factor 3b, subunit 1	11.5575	11.9265	11.8848	11.7693	11.4514	11.6828
Trem2	83433	TREM-2|Trem2a|Trem2b|Trem2c	triggering receptor expressed on myeloid cells 2	9.84384	11.7253	11.329	11.7059	11.6142	10.5815
Chrdl1	83453	CHL|CHL1|Nrln1|VOPT	chordin-like 1	5.56488	4.6205	5.45896	4.72799	4.9005	5.88104
Pik3ap1	83490	1810044J04Rik|BCAP	phosphoinositide-3-kinase adaptor protein 1	11.0946	12.3733	12.2135	12.1806	11.9184	11.3675
Tdrd1	83561	MTR-1	tudor domain containing 1	2.62628	4.06411	3.77446	3.36542	3.064	2.7815
Elovl4	83603	-	elongation of very long chain fatty acids (FEN1/Elo2, SUR4/Elo3, yeast)-like 4	6.61117	7.36897	6.62531	4.95038	9.42657	7.1239
Cd96	84544	1700109I12Rik|Tactile	CD96 antigen	6.0186	7.02104	6.68135	7.42842	7.08953	7.1137
Cd163	93671	CD163v2|CD163v3	CD163 antigen	12.2785	10.7012	11.1301	10.9958	11.0672	12.3527
Il24	93672	FISP|Mda-7|Mda7|St16	interleukin 24	6.28925	6.6205	6.66754	7.21627	6.9005	6.98538
Echs1	93747	C80529	enoyl Coenzyme A hydratase, short chain, 1, mitochondrial	10.0789	9.68228	9.60735	9.89345	9.96917	9.84297
Brwd1	93871	5330419I02Rik|D530019K20Rik|G1-403-16|Wdr9|repro5	bromodomain and WD repeat domain containing 1	8.9691	8.75144	8.86797	8.65609	8.43157	8.96567
Trim9	94090	-	tripartite motif-containing 9	3.84867	4.14657	3.13703	3.72799	3.064	3.14407
Trim33	94093	8030451N04Rik|AI413936|Ecto|Tif1g	tripartite motif-containing 33	7.88681	7.56161	7.53696	7.4407	7.53277	7.52874
Cd276	102657	6030411F23Rik|AU016588|B7RP-2|B7h3	CD276 antigen	8.11278	7.606	7.60373	7.50057	7.40639	7.25955
Kdm3a	104263	1700105C21Rik|C230043E16Rik|JHDM2a|Jmjd1|Jmjd1a|KDM2A|TGSA|Tsga	lysine (K)-specific demethylase 3A	9.71374	9.67882	9.77123	9.65346	9.30104	9.70207
Dgkz	104418	E130307B02Rik|ENSMUSG00000075035|F730209L11Rik|mDGK[z]	diacylglycerol kinase zeta	10.6615	11.1689	11.0834	11.2145	10.9777	10.893
Prkaa1	105787	AI194361|AI450832|AL024255|AMPKalpha1|C130083N04Rik	protein kinase, AMP-activated, alpha 1 catalytic subunit	9.71728	10.0694	9.99363	10.1374	9.87135	9.86137
Ldhal6b	106557	4933402O15Rik|AI326310|LDHL|Ldhal	lactate dehydrogenase A-like 6B	5.28925	5.26205	5.55207	5.01749	5.11462	5.10343
Ticam1	106759	AW046014|AW547018|TICAM-1|TRIF	toll-like receptor adaptor molecule 1	7.92396	8.04274	8.01695	7.96745	8.00484	7.99652
Acaca	107476	A530025K05Rik|Acac|Acc1|Gm738	acetyl-Coenzyme A carboxylase alpha	9.8567	8.87147	9.06777	8.68734	8.94314	9.04561
Il1rl2	107527	AI481289|AW551444|IL-1Rrp2	interleukin 1 receptor-like 2	7.49253	7.42786	7.91547	7.11265	7.85655	7.74894
Tcrg-C4	107576	TRGC4	T cell receptor gamma, constant 4	5.74176	6.3165	5.79999	6.70781	6.4661	6.70207
Cdc20	107995	2310042N09Rik|C87100|p55CDC	cell division cycle 20	6.99552	6.91916	7.19592	7.09722	6.59649	5.466
Camk2d	108058	2810011D23Rik|8030469K03Rik|CaMK II|[d]-CaMKII	calcium/calmodulin-dependent protein kinase II, delta	9.41418	10.6588	10.5818	10.5942	10.127	9.70547
Prkaa2	108079	2310008I11Rik|A830082D05|AMPKalpha2	protein kinase, AMP-activated, alpha 2 catalytic subunit	6.46758	4.83463	4.61096	3.14302	5.064	5.7815
Card11	108723	0610008L17Rik|2410011D02Rik|BIMP3|CARMA1	caspase recruitment domain family, member 11	7.80287	8.52739	8.33779	8.58597	8.12701	8.23154
Pkn2	109333	6030436C20Rik|AI507382|PRK2|Prkcl2|Stk7	protein kinase N2	9.50892	9.3342	9.28903	9.26196	9.11151	9.25724
Acat2	110460	AW742799|Tcp-1x|Tcp1-rs1	acetyl-Coenzyme A acetyltransferase 2	7.23114	6.45238	6.68135	6.9331	6.91485	6.86897
Iglc1	110785	Clambda1|Igl-C1	immunoglobulin lambda constant 1	5.28925	4.6205	5.49067	5.51226	5.38593	5.90489
Scn2a1	110876	6430408L10|A230052E19Rik|Nav1.2|Scn2a	sodium channel, voltage-gated, type II, alpha 1	2.84867	1.97665	0.967103	0.55806	0.256642	3.88104
Sesn1	140742	1110002G11Rik|AU044290|Pa26|Sest1	sestrin 1	9.75385	10.3743	9.94008	10.3029	9.71812	9.9327
Tlr7	170743	-	toll-like receptor 7	9.7102	10.1327	9.88448	9.83651	10.1162	10.0335
Cd209e	170780	SIGNR4|mSIGNR4	CD209e antigen	7.27014	6.71811	6.72199	7.21627	7.70785	8.05097
Acot3	171281	AW108394|PTE-Ia|Pte2a	acyl-CoA thioesterase 3	4.50075	3.784	4.49067	4.72799	4.64896	4.55911
Havcr2	171285	TIM-3|Tim3|Timd3	hepatitis A virus cellular receptor 2	2.84867	5.43608	5.49067	5.68734	3.95708	4.14407
Rimkla	194237	B930030J24|NAAGS|NAAGS-II|Rimk	ribosomal modification protein rimK-like family member A	3.62628	4.22458	4.28903	4.36542	3.71607	4.36647
Dtx4	207521	AI449438|BC044798|D930042H13|RNF155	deltex 4 homolog (Drosophila)	7.84867	7.95964	7.74846	8.10495	7.52343	6.92835
Btla	208154	A630002H24	B and T lymphocyte associated	8.06923	7.94819	8.00053	7.65609	7.17551	7.76857
Creb3l2	208647	BBF2H7|C530025K05Rik|SCIRR69	cAMP responsive element binding protein 3-like 2	9.03284	7.85929	8.32466	7.89791	8.3441	9.00482
Cblb	208650	AI429560|AI851073|Cbl-b	Casitas B-lineage lymphoma b	8.30341	8.91623	8.75827	8.71793	8.56498	8.79433
Pycr1	209027	-	pyrroline-5-carboxylate reductase 1	6.48426	4.06411	5.28903	4.55806	5.25664	5.22208
Ccnb3	209091	-	cyclin B3	3.04132	2.29858	2.9671	3.72799	3.57857	3.29608
Ido2	209176	AI265623|C230043N17Rik|Ido-2|Indol1	indoleamine 2,3-dioxygenase 2	3.36325	3.43608	4.13703	3.14302	4.3441	3.55911
Itga10	213119	A630048L14	integrin, alpha 10	4.36325	4.43608	4.9671	4.46495	4.7802	4.67459
Il1f9	215257	Il36g	interleukin 1 family, member 9	5.39887	4.6205	3.9671	4.36542	6.3441	5.29608
9230019H11Rik	215728	-	RIKEN cDNA 9230019H11 gene	3.04132	2.56161	1.9671	2.55806	3.71607	1.97415
Ube2d1	216080	UBCH5	ubiquitin-conjugating enzyme E2D 1	9.32903	9.27814	9.22685	9.36863	9.37038	9.22918
Socs2	216233	8030460M17|AI527257|AW108012|CIS2|Cish2|D130043N08Rik|JAB|SOCS-2|SSI-2|hg	suppressor of cytokine signaling 2	9.23114	8.33859	8.34214	8.48287	8.63602	9.024
Gls2	216456	A330074B06Rik|AI195532|GA|GLS|Lga	glutaminase 2 (liver, mitochondrial)	5.1706	3.784	4.13703	4.55806	4.25664	4.22208
Acsl6	216739	A330035H04Rik|AW050338|Facl6|LACS|Lacsl|mKIAA0837	acyl-CoA synthetase long-chain family member 6	3.04132	3.29858	3.28903	3.87999	3.95708	3.43358
Cdc14b	218294	2810432N10Rik|A530086E13Rik|AA472821|CDC14B3|Cdc14B1	CDC14 cell division cycle 14B	5.59591	5.97665	6.03319	5.95038	5.4661	5.22208
Il31ra	218624	CRL3|GLM-R|GPL|Glmr|NR10	interleukin 31 receptor A	3.62628	4.22458	3.77446	3.87999	4.064	3.7815
Rarb	218772	A830025K23|Hap|Nr1b2	retinoic acid receptor, beta	4.21124	3.88354	4.28903	3.36542	4.57857	4.55911
Cd226	225825	BC051526|DNAM-1|DNAM1|Pta1|TLiSA1	CD226 antigen	9.53717	9.21027	9.42858	9.78928	9.97774	10.0814
Ppp2r5b	225849	B'beta|BC026670	protein phosphatase 2, regulatory subunit B', beta	8.13935	8.22931	8.24787	8.10495	8.15751	8.20777
Taf6l	225895	2810417N14Rik|BB223262|C530024J06Rik|Paf65a	TAF6-like RNA polymerase II, p300/CBP-associated factor (PCAF)-associated factor	8.33134	8.39871	8.45494	8.58043	8.49505	8.19815
Aph1a	226548	6530402N02Rik|APH-1a	anterior pharynx defective 1a homolog (C. elegans)	8.82595	8.70116	8.94438	9.12792	9.05754	8.91079
Ppp2r5a	226849	PR61alpha	protein phosphatase 2, regulatory subunit B', alpha	11.516	11.6393	11.6316	11.8231	11.5518	11.647
Slc2a6	227659	A330096C23|F630103L12Rik|Glut6|Glut9	solute carrier family 2 (facilitated glucose transporter), member 6	6.10741	7.63486	7.98391	7.94176	8.251	7.06161
Aldob	230163	Aldo-2|Aldo2|BC016435	aldolase B, fructose-bisphosphate	2.84867	2.97665	2.28903	3.14302	2.57857	2.7815
Sesn2	230784	HI95|SEST2|Ses2	sestrin 2	8.14461	8.16647	8.3114	8.17277	8.18145	7.91666
Tnfrsf14	230979	Atar|HveA|Hvem|Tnfrs14	tumor necrosis factor receptor superfamily, member 14 (herpesvirus entry mediator)	9.71374	10.4422	10.5955	10.6809	10.2804	10.1175
Hadhb	231086	4930479F15Rik|Mtpb|TP-beta	hydroxyacyl-Coenzyme A dehydrogenase/3-ketoacyl-Coenzyme A thiolase/enoyl-Coenzyme A hydratase (trifunctional protein), beta subunit	11.0567	10.7896	10.6719	11.0489	10.9631	11.1689
Gckr	231103	GKRP	glucokinase regulatory protein	4.12878	4.88354	5.17656	4.95038	4.8416	4.36647
Creb5	231991	Crebpa|D430026C09Rik	cAMP responsive element binding protein 5	6.28925	7.09559	7.36798	6.98432	6.3441	6.01854
Gys2	232493	BC021322|LGS	glycogen synthase 2	4.43364	3.67709	4.21503	4.46495	3.95708	4.36647
Lilra5	232801	E030017K20|EG232801|Gm4878|Lilrc1	leukocyte immunoglobulin-like receptor, subfamily A (with TM domain), member 5	6.04132	6.22458	5.55207	5.80599	6.30104	6.01854
Siglecf	233186	Siglec5|mSiglec-F	sialic acid binding Ig-like lectin F	4.28925	4.83463	5.66754	5.41604	6.21084	6.06161
Siglech	233274	6430529G09Rik|Siglec-H	sialic acid binding Ig-like lectin H	8.73481	9.16152	8.86192	9.10495	8.41146	9.09568
Plcg2	234779	PLCgamma2|Plcg-2	phospholipase C, gamma 2	10.3267	11.5742	11.5497	11.4665	10.976	10.7315
Zbtb16	235320	AI467657|PLZF|Zfp145|lu	zinc finger and BTB domain containing 16	8.45917	6.82214	6.98947	6.64552	6.42657	8.38778
Fbll1	237730	AI595406	fibrillarin-like 1	2.36325	2.784	3.13703	3.87999	2.8416	4.22208
Apob	238055	AI315052|Apo B-100|apob-100|apob-48	apolipoprotein B	3.62628	4.22458	4.49067	5.14302	4.50457	4.72904
Igha	238447	IgA|Igh-2	immunoglobulin heavy constant alpha	4.36325	4.14657	4.42654	4.14302	3.42657	4.43358
Rasgrp3	240168	BC066069|Gm327	RAS, guanyl releasing protein 3	7.67068	7.52354	7.4828	6.82485	7.39619	7.79433
Malt1	240354	A630046N12|D430033E09Rik	MALT1 paracaspase	9.39667	10.191	10.152	10.1911	9.77824	9.92106
Tnfsf18	240873	Gitrl	tumor necrosis factor (ligand) superfamily, member 18	4.50075	4.22458	4.77446	4.55806	4.25664	4.67459
Prkag3	241113	AMPKg3L|AMPKg3S|Amkg3|Ampkg3	protein kinase, AMP-activated, gamma 3 non-catatlytic subunit	2.84867	3.88354	3.13703	3.14302	3.25664	2.7815
Phc3	241915	E030046K01Rik|Edr3|Hph3	polyhomeotic-like 3 (Drosophila)	9.55899	9.64553	9.71194	9.41604	9.19033	9.80862
Pglyrp3	242100	Gm420	peptidoglycan recognition protein 3	3.50075	4.06411	4.35942	4.87999	4.16353	2.55911
Vtcn1	242122	B7h4|B7s1|B7x|BC032925	V-set domain containing T cell activation inhibitor 1	8.02431	4.97665	5.32466	4.36542	6.69959	8.02943
Gdf6	242316	BMP-13|BMP13|GDF16	growth differentiation factor 6	3.21124	3.67709	3.87399	4.14302	3.95708	2.97415
E2f2	242705	E2F-2	E2F transcription factor 2	6.74176	7.93665	8.13201	8.19468	7.61419	6.84451
Tox3	244579	500-9|BC052044|C230068E13|CAGF9|Tnrc9	TOX high mobility group box family member 3	6.04132	3.97665	5.32466	4.64552	5.064	6.3317
Atr	245000	-	ataxia telangiectasia and Rad3 related	8.20119	8.4685	8.41831	8.31295	7.55126	8.00757
Gzmn	245839	GrN	granzyme N	3.36325	3.56161	2.55207	4.01749	4.8416	3.97415
Fcgr4	246256	4833442P21Rik|CD16-2|FcgRIV|FcgammaRIV|Fcgr3a|Fcrl3	Fc receptor, IgG, low affinity IV	9.36099	11.1988	10.8642	11.677	10.8141	9.79273
Oas3	246727	Oasl10	2'-5' oligoadenylate synthetase 3	6.41636	8.50803	8.73859	8.69761	8.86767	7.34047
Oas2	246728	Oasl11	2'-5' oligoadenylate synthetase 2	9.29398	10.9468	11.1439	10.2163	10.2354	9.61259
Oas1a	246730	L3	2'-5' oligoadenylate synthetase 1A	9.94219	11.4973	11.5346	11.551	11.7171	10.4377
Tox	252838	1700007F02Rik	thymocyte selection-associated high mobility group box	6.21124	6.40291	6.15693	7.21627	6.8265	6.40041
Irak4	266632	8430405M07Rik|9330209D03Rik|IRAK-4|NY-REN-64	interleukin-1 receptor-associated kinase 4	9.21874	9.71643	9.51593	9.74541	9.41146	9.46199
Ccnb1	268697	Ccnb1-rs1|Ccnb1-rs13|CycB1|Cycb-4|Cycb-5|Cycb1-rs1	cyclin B1	8.60356	8.784	8.58181	8.96745	8.25664	7.392
Tox4	268741	5730589K01Rik|A630040M18|AA410149|LCP1	TOX high mobility group box family member 4	8.90241	9.24343	9.08604	9.37504	9.00484	8.97977
Pkmyt1	268930	6230424P17|AW209059|Myt1	protein kinase, membrane associated tyrosine/threonine 1	6.19107	6.3165	6.88597	6.55806	6.08953	5.52874
Ltbp1	268977	9430031G15Rik|9830146M04|Ltbp-1|Tgfb|b2b1000Clo	latent transforming growth factor beta binding protein 1	8.63378	6.56161	6.69502	6.41604	6.54204	7.26877
Nup54	269113	3110079L04Rik|54kDa	nucleoporin 54	8.54911	8.5987	8.5483	8.62415	8.4013	8.25027
Tox2	269389	AI851523|AV026525|BI987407|Gcx1|RxHMG1	TOX high mobility group box family member 2	6.28925	4.73154	4.87399	4.46495	6.18738	7.63949
Shc4	271849	6230417E10Rik|9930029B02Rik|Gm685|RaLP	SHC (Src homology 2 domain containing) family, member 4	5.04132	4.67709	4.66754	4.46495	4.7802	3.55911
Spib	272382	Spi-B	Spi-B transcription factor (Spi-1/PU.1 related)	6.58048	7.15656	6.6536	7.52384	6.38593	6.88104
Ptpn7	320139	BPTP-4|C920001D21Rik|HEPTP|LC-PTP|LPTP	protein tyrosine phosphatase, non-receptor type 7	8.46758	9.71136	9.58365	9.74294	9.49743	9.14908
Mysm1	320713	C130067A03Rik|C530050H10Rik	myb-like, SWIRM and MPN domains 1	8.09117	8.53889	8.47886	8.29953	7.77234	8.27336
Itgb8	320910	4832412O06Rik	integrin beta 8	7.60356	5.50021	4.9671	4.80599	5.8416	5.97415
Xaf1	327959	Fbox39	XIAP associated factor 1	9.26049	10.7629	10.8543	10.8469	10.9104	9.73736
Hecw2	329152	A730039N16Rik|D030049F17Rik|Gm971|Nedl2|mKIAA1301	HECT, C2 and WW domain containing E3 ubiquitin protein ligase 2	3.94821	3.88354	3.87399	4.80599	3.57857	3.88104
Bpi	329547	9230105K17Rik|Bpifd1	bactericidal permeablility increasing protein	3.94821	4.43608	4.13703	4.95038	4.064	4.06161
Cxcl3	330122	Dcip1|Gm1960	chemokine (C-X-C motif) ligand 3	5.71374	3.67709	3.55207	4.36542	6.42657	4.97415
Il1rapl1	331461	6330532G10Rik|C030039N24|IL1R8|IL1RAPL|MRX34|OPHN4|TIGIRR-2	interleukin 1 receptor accessory protein-like 1	3.50075	3.97665	3.13703	2.14302	3.57857	3.7815
Atp6v1g3	338375	-	ATPase, H+ transporting, lysosomal V1 subunit G3	2.84867	3.14657	3.42653	3.14302	3.42657	3.14407
Slc2a12	353169	GLUT-12|Glut12	solute carrier family 2 (facilitated glucose transporter), member 12	4.21124	4.43608	4.35942	4.2585	4.16353	4.14407
Trim46	360213	TRIFIC	tripartite motif-containing 46	4.28925	4.56161	4.55207	5.36542	4.42657	4.7815
Ighg	380794	AU044919|IGHG2A	Immunoglobulin heavy chain (gamma polypeptide)	6.64123	6.14657	6.53696	5.95038	3.95708	6.6884
Ceacam3	384557	EG384557|Psg24|cea12	carcinoembryonic antigen-related cell adhesion molecule 3	2.04132	2.784	3.9671	4.2585	3.42657	3.55911
Ifnk	387510	-	interferon kappa	2.84867	3.43608	2.55207	1.55806	2.57857	3.67459
Maml3	433586	AV234550|BC049812|Mam-2|mKIAA1816	mastermind like 3 (Drosophila)	7.74868	7.95393	8.07563	7.63488	7.23392	7.79433
Fcrlb	435653	FREB-2|FREB2|FcRL2|Fcrlm2|Fcry|mFCRL2	Fc receptor-like B	4.36325	6.95393	7.41005	6.66658	6.76444	5.61801
Cyp26c1	546726	EG546726	cytochrome P450, family 26, subfamily c, polypeptide 1	3.04132	3.784	4.13703	2.87999	3.8416	3.55911
Aldh3b2	621603	AI848594|C130048D07Rik	aldehyde dehydrogenase 3 family, member B2	5.25077	4.784	4.55207	5.08162	5.64896	5.67459
Trdv5	626545	EG626545|Gm6683|Tcrd	T cell receptor delta variable 5	4.56488	5.02104	4.9671	6.20192	5.4661	4.97415
Trdv1	627813	Gm13895|OTTMUSG00000015027	T cell receptor delta variable 1	4.43364	4.22458	3.9671	5.20192	4.3441	4.06161
Cd101	630146	EWI-101|Gm1016|Gm734|Igsf2	CD101 antigen	5.84867	7.08517	6.53696	6.9331	6.85655	6.51331
Ms4a4a	666907	EG666907	membrane-spanning 4-domains, subfamily A, member 4A	11.0272	11.2603	11.1086	11.2766	10.8805	11.3686
Rnf213	672511	6030403J01|D11Ertd759e|mKIAA1554	ring finger protein 213	10.0129	11.4304	11.6382	11.0539	10.7615	10.4161
Tigit	100043314	ENSMUSG00000071552|Vstm3	T cell immunoreceptor with Ig and ITIM domains	7.41636	9.15407	8.62888	9.57765	8.9041	8.84451
Klrb1	100043861	4930431A04Rik|Gm4696|Klrb1g|Klrb6|Ly-55|Ly55|NKR-P1G|Nkrp-1e|Nkrp1g	killer cell lectin-like receptor subfamily B member 1	3.94821	4.22458	3.42653	4.64552	4.25664	3.55911
Trac	100101484	Gm16914|Tcra|Tcra-C	T cell receptor alpha constant	8.33134	9.74318	9.33343	10.4574	10.0265	9.87954
Trdv3	100114900	-	T cell receptor delta variable 3	2.04132	3.56161	3.66754	4.36542	2.8416	3.88104
Trdv4	100114901	-	T cell receptor delta variable 4	6.10741	6.02104	6.17656	6.84346	6.11462	6.74233
Trdc	100123473	Tcrd-C	T cell receptor delta, constant region	7.06369	7.3342	7.03319	8.2234	7.72425	7.94569
Zfp683	100503878	Gm13060|Hobit|OTTMUSG00000010217	zinc finger protein 683	3.84867	4.50021	4.49067	5.20192	5.064	4.43358
Tpsab1	100503895	MMCP-7|Mcp-7|Mcp7|Mcpt7	tryptase alpha/beta 1	9.78951	8.61327	9.5082	8.82016	10.3626	10.3899
Cd244a				2.04132	3.97665	3.55207	4.01749	3.8416	3.7815
Pvrig				7.48426	8.65964	8.21028	8.45893	8.3281	7.91079
Kir3dl1/2				2.04132	4.06411	3.42653	3.14302	3.42657	4.14407
Cyp4a12a/b				3.50075	2.56161	3.13703	3.14302	3.57857	2.97415
Ccl21a/b/c				4.43364	5.59136	5.39337	4.72799	6.76444	5.43358
Cyp4a31/32				3.36325	4.22458	3.55207	3.72799	3.57857	2.97415
Ifit3/3b				8.81611	11.2458	11.2969	11.3071	11.6398	10.115
Ighv3				6.8615	6.41959	6.39337	5.64552	5.4661	7.67459
Il11ra1/2				8.27014	7.91329	7.9213	8.001	8.38076	8.15406
LCMV				3.04132	3.67709	3.66754	4.2585	3.42657	3.97415
Psme2/2b				12.1165	12.5856	12.402	13.0333	12.6779	12.3084
Rorg				7.48426	3.29858	5.63953	4.46495	5.92907	6.98538
Rorgt				4.8993	4.36897	4.61096	5.08162	5.16353	5.55911
Stat5a/b				11.0462	10.4775	10.5892	10.6796	10.6457	10.6806
Trbc1/2				8.99552	9.79203	9.36157	10.402	10.0048	10.0131
Trdv2-1/2-2				4.28925	4.93084	5.09639	5.84346	5.01153	5.95143
Trgc1/2/3				7.25077	6.93084	6.68135	7.69761	7.53277	7.72904
Trgv1/Trgv2/Trgv3				5.46758	6.08517	5.61096	6.74788	6.44647	6.14407
