# Supplementary material for: Kindlin-1 regulates IL-6 secretion and modulates the immune environment in breast cancer models
Source: eLife journal article supplement (doi:10.7554/elife.85739), 2023-03-08
Supplement: supp [file elife-85739-supp-v1.zip]

Unedited raw gel for Figure 1-Figure supplement 1A

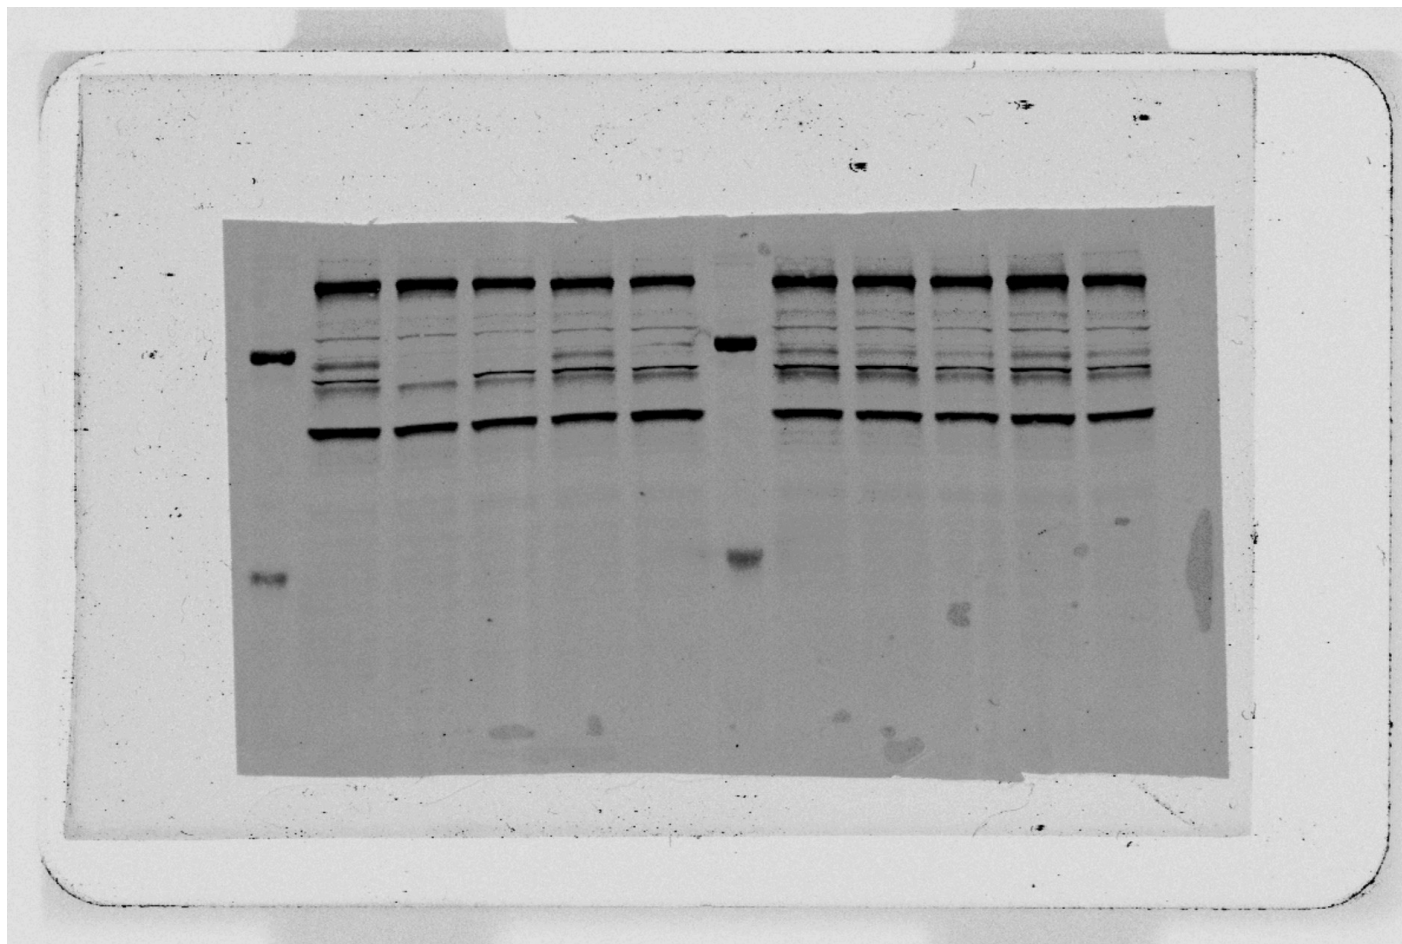

Labelled gel for Figure 1-Figure supplement 1A

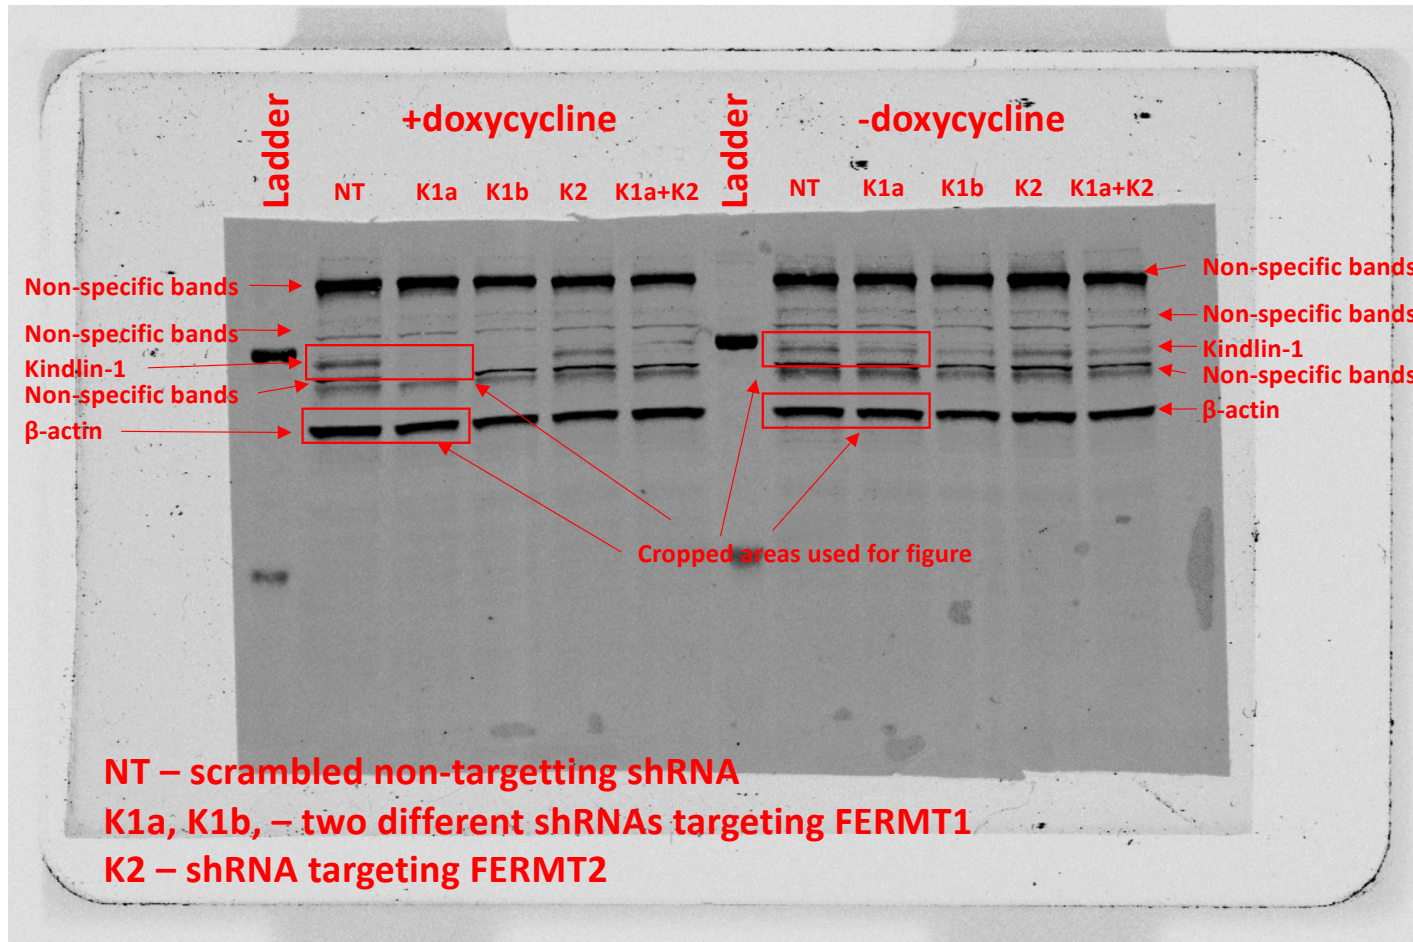

Unedited raw gel for Figure 1-Figure supplement 1C

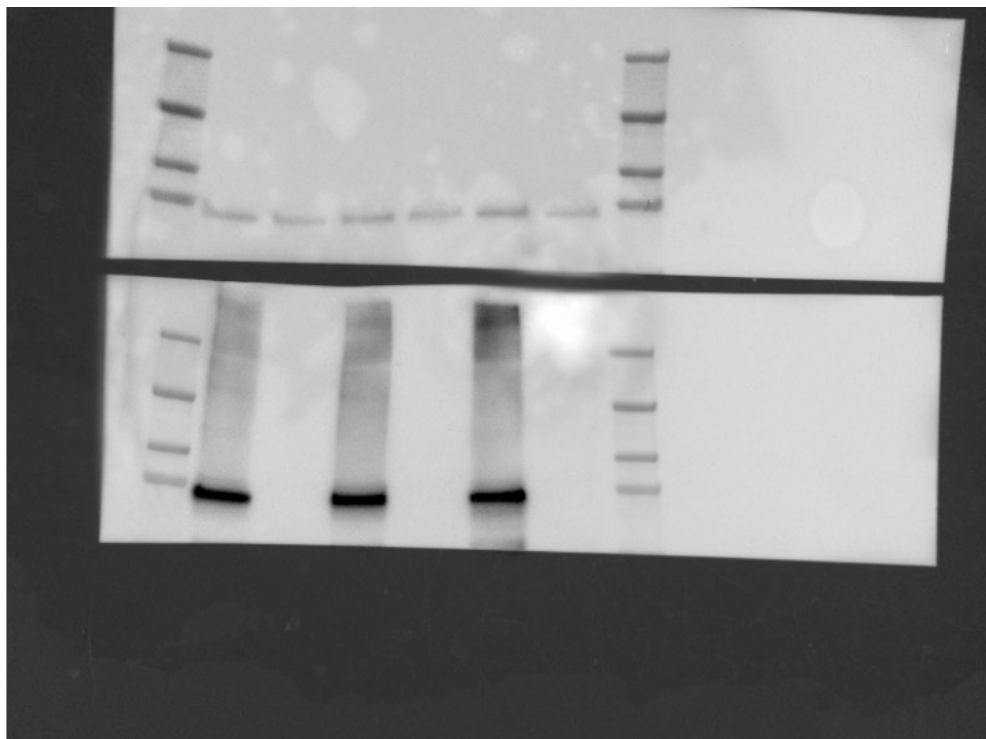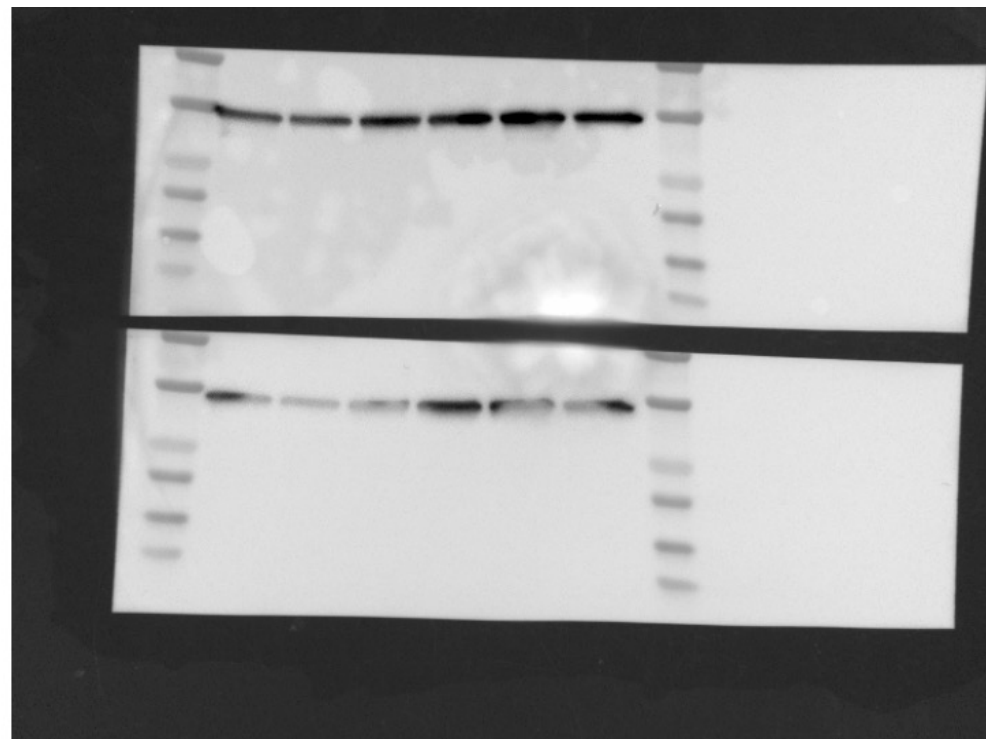

Unedited raw gel for Figure 1-Figure supplement 1C

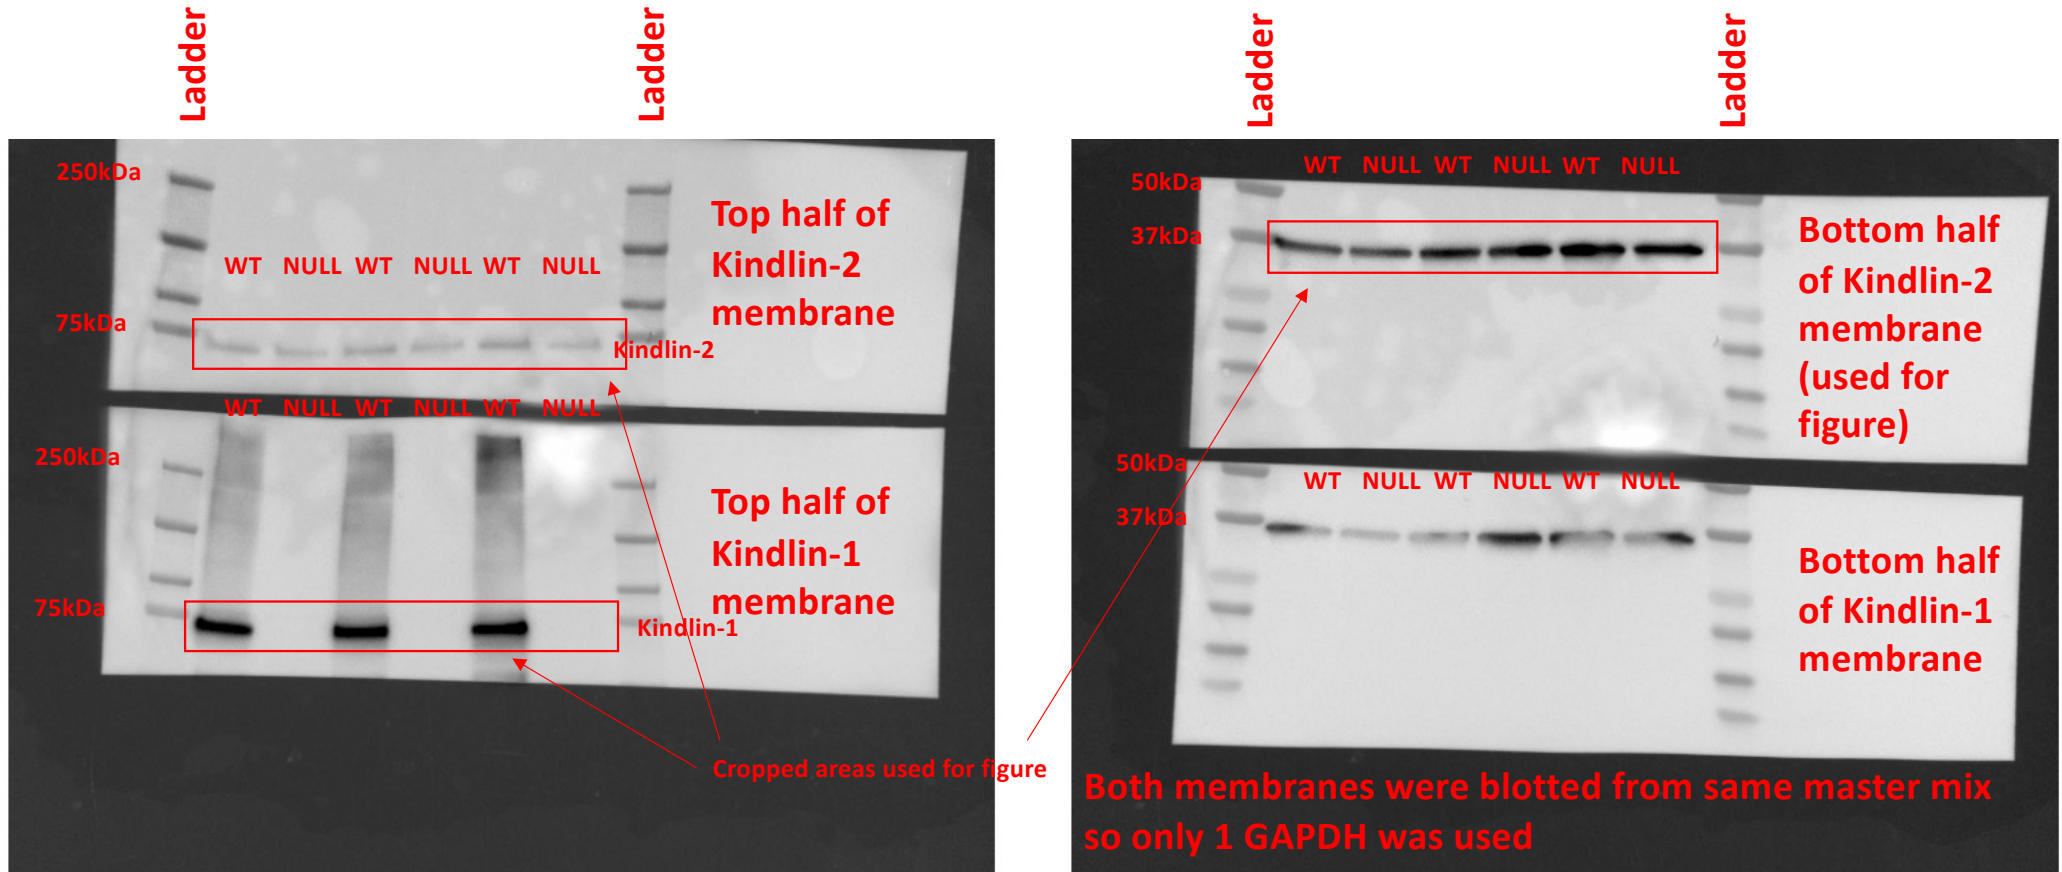

Both are merges with colorimetric images to show ladder. For figure, just the band image was used
