# Supplementary material for: Kindlin-1 regulates IL-6 secretion and modulates the immune environment in breast cancer models
Source: eLife. 2023 Mar 8;12:e85739. doi: 10.7554/eLife.85739 (PMC10023156; doi:10.7554/eLife.85739)
Supplement: Supplementary file 1. [file elife-85739-supp1.xlsx]

## Sheet: Sheet1
Supplementary file 1 - List of antibodies used for immunophenotyping
Antigen	Flurophore	Supplier	Cat #
CD3	PerCP-Cy5.5	Biolegend	100218
CD3	BUV496	BD Biosciences	612955
CD4	Brilliant Violet 711™	Biolegend	100447
CD4	APC-H7	BD Biosciences	560246
CD8	Brilliant Violet 510™	Biolegend	100752
FoxP3	PE	ThermoFischer	12-5773-82
γδTCR	Brilliant Violet 421™	Biolegend	118120
CD44	APC-R700	BD Biosciences	565480
CD62L	PE-Cy7	Biolegend	104418
RoRγT	BV650	BD Biosciences	564722
CD25	Brilliant Violet 785™	Biolegend	102051
PD-1	Brilliant Violet 605™	Biolegend	135220
TIM-3	APC	ThermoFischer	17-5871-80
CD45	BV786	BD Biosciences	564225
CD11b	APC-R700	BD Biosciences	564985
CD11c	PE/Dazzle™ 594	Biolegend	117348
F4/80	FITC	Biolegend	123108
Ly6C	PerCP-Cy5.5	Biolegend	128012
Ly6G	PE-Cy7	Biolegend	108415
MHC II	Brilliant Violet 510™	Biolegend	107636
CD206	Brilliant Violet 711™	Biolegend	141727
PD-L1	Brilliant Violet 650™	Biolegend	124336
CD103	Brilliant Violet 605™	Biolegend	121433
SIRPa	PE	Biolegend	144012
CLEC9a	BV421	BD Biosciences	564271
Ki67	Brilliant Violet 421™	Biolegend	151208
CD107a	Brilliant Violet 510™	Biolegend	121629
Granzyme B	FITC	Biolegend	515403
TNFα	PE-Dazzle 594	Biolegend	506345
GITR	FITC	Biolegend	120205
TIGIT	Brilliant Violet 421™	Biolegend	142111
OX40	PerCP-Cy5.5	Biolegend	119424
CD83	Brilliant Violet 650™	Biolegend	121515
4-1BB	eFluor450	ThermoFischer	48-1371-80
CTLA-4	PerCP-Cy5.5	Biolegend	106315
LAG3	BV711	BD Biosciences	563179
CD39	APC	Biolegend	143809
CD73	Brilliant Violet 605™	Biolegend	127215
CD29	APC-Cy7	Biolegend	102225
